# Supplementary material for: Paired mutation calling and spatial transcriptomics identify cellular neighbourhoods dictating the neoplastic outcome of colitis
Source: Research Square preprint supplement (doi:10.21203/rs.3.rs-6401505/v1), 2025-05-08
Supplement: Supplementary file 1 [file 3cc4a3aab865521498d83883.xlsx]

## Sheet: Sheet1
Gene	Number amplicons	% dual coverage	% coverage
Fbxw7	50	100	100
Idh1	28	100	100
Rnf43	43	100	100
Smad4	39	98	100
Rela	40	100	100
Apc	162	99.2	100
Ctnnb1	51	100	100
Kras	15	100	100
Trp53	31	100	100
Braf	4	100	1
Hras	2	100	2
Nras	2	100	1
Pten	6	77	2
Il17ra	58	100	100
Il17rc	54	98.8	100
Zc3h12a	34	100	100
Nfkbiz	48	94.7	94.7
Pigr	48	99.6	100
Bcor	104	100	100
Traf5	32	99.6	100
Etv6	32	99.6	100
Traf3ip2	34	100	100
