# Supplementary material for: Paired mutation calling and spatial transcriptomics identify cellular neighbourhoods dictating the neoplastic outcome of colitis
Source: Research Square preprint supplement (doi:10.21203/rs.3.rs-6401505/v1), 2025-05-08
Supplement: Supplementary file 2 [file f666c956c0c38175b842a0a4.xlsx]

## Sheet: Sheet1
Panel	Gene/Chr	Assay_ID	Assay_Name	F-sp	R-sp	Len	GC	Amplicon	Chr	From	To	Flag	Pool
Inflammation_1	chr9	TXA0491126	CTNNB1_t2_1	ATTTCAATGGGTCATTGTCGTAG	ATCTTCTTCCTCAGGGTTGCC	230	50	ATTTCAATGGGTCATTGTCGTAGATGGCTTCTTCAGGTAGCATTTTCAGTTCACTAACATACTCTGTTTTTACAGCTGACCTGATGGAGTTGGACATGGCCATGGAGCCGGACAGAAAAGCTGCTGTCAGCCACTGGCAGCAGCAGTCTTACTTGGATTCTGGAATCCATTCTGGTGCCACCACCACAGCTCCTTCCCTGAGTGGCAAGGGCAACCCTGAGGAAGAAGAT	chr9	120950447	120950676	Assays designed by relax mode and have no off-target hits	3
Inflammation_1	TRP53_t7	TXA0491117	TRP53_t7_2	TGGTCCTTTTCTTGTCCCGG	AGCAAGAGGTGACTTTGGGG	226	57	TGGTCCTTTTCTTGTCCCGGATAGTGGGAACCTTCTGGGACGGGACAGCTTTGAGGTTCGTGTTTGTGCCTGCCCTGGGAGAGACCGCCGTACAGAAGAAGAAAATTTCCGCAAAAAGGAAGTCCTTTGCCCTGAACTGCCCCCAGGGAGCGCAAAGAGAGGTACGCAGGCGGGACCAAGGAGGCGGAGGAGCCTGTTGAGCTTCACCCCAAAGTCACCTCTTGCT	chr11	69589549	69589774		2
Inflammation_1	ARID1A_t13	TXA0491116	ARID1A_t13_2	CAGCGTTCCTGATCATTCCT	ACACATTCTACAGCGTTCGT	240	48	CAGCGTTCCTGATCATTCCTTACCTCATGCCTGGTAAGGGGGGAATTTGACTATGTGGTGTGGATGCTGGAGTTGGTGGCTTCAGGTCTCCTCCTTCTGCCATAGAACTGCTGGTTGACTGAGGAGTTTGTGGCCCCTGCATAGACCCTGATCCCGCTGTGGACAGAGATGCAGAGTGAGCTGCTAACTTGTAAGAAAAGTATTTAACTCTTACAATATTACGAACGCTGTAGAATGTGT	chr4	133687515	133687754		3
Inflammation_1	Pten_3	TXA0491115	Pten_3_2	TGTTTGTTTTGTTTTAAGGTTTTTGGA	CGCTTCGAGACCCAACAACT	220	28	TGTTTGTTTTGTTTTAAGGTTTTTGGATTCAAAGCATAAAAACCATTACAAGATATACAATCTGTAAGTATGCTTTTTTTATTTGTCTCTGTTAAAATAACTAAATAAAAGTTATTTCTTTGTTGAAGataaaaatatatttagatatttttatatttGAGGAACTGGATTCCTGAAAACAGTTGCAGTCTGATAGAGAGAGTTGTTGGGTCTCGAAGCG	chr19	32792531	32792750		2
Inflammation_1	RELA_t1	TXA0491114	RELA_t1_1	GGATTCCGGGCAGTGACG	GGGAGATTCCGCCGCAGG	195	72	GGATTCCGGGCAGTGACGCGACGACGGGCGCGCGCCGCGCATTTCCGCCTCTGGCGAATGGCTTTACTTTAGCGCGCCGTGGGCTCAGCTGCGACCCCGGCCCCGCCCCCGGGACCCTGACCATGGACGGTGAGGCTGCCCTCTGGCTCGGGGGATGGCTGCCCTAGAGCTCCGGGGCCTGCGGCGGAATCTCCC	chr19	5637713	5637907		8
Inflammation_1	chr4	TXA0491113	ARID1A_t1_11	CCGTTCGAGTTCTTCAGGTC	AAGAAAGCCGAGCAGCAA	239	77	CCGTTCGAGTTCTTCAGGTCCGGCTCCGCGCCGGGCccgccgccgctgccggctccgccgccgccgccaccCCCATTGCTCTCGGCCCCGTCCTGCAGCTCCTTTCCCAGCGGCTGCGGCGGCCCCACGGCGGGGCCCTCGCTCTCCTGCCCGGCGGCTGCCTTCATTTCCCCGCGCTCGGCCGCTGCCGCCGCCGCCTCGCCCCCCGCCTCCTCCCGCTGTTGCTGCTCGGCTTTCTT	chr4	133753304	133753542	Assays designed by relax mode and have no off-target hits	5
Inflammation_1	ARID1A	TXA0491112	ARID1A_t1_10	GCTTGCCCGAAGCCGTA	GGCCGAGAGCAATGGG	240	79	GCTTGCCCGAAGCCGTAGGCTGGGGGCGGCAGGGCGGCCGCGGCCGAGTGAGGAGGCGCCCCCACCccgtcgctgctgctgctgccgccgccgccgccgccgccgGGCGGCTCCGGGAGGTTATTGTTCAGGGCGGGCCTAGGGCCCGCGTTCCCGTTCGAGTTCTTCAGGTCCGGCTCCGCGCCGGGCccgccgccgctgccggctccgccgccgccgccaccCCCATTGCTCTCGGCC	chr4	133753151	133753390		7
Inflammation_1	ARID1A	TXA0491111	ARID1A_t1_5	GAAGCGCTGCTGTGCGAA	GGGCCCCAGCAGAACTC	225	72	GAAGCGCTGCTGTGCGAAGGACGAAGACGACGAGGAGGCAGAGGCGCTGGAGGAGGGAGGCGGCTTGGAgccggcggccgccgccgcgccggAGCCCGGAGTGCCACCTCTCGGGGAGCTCAGCGCGTAGGCCTGGGGAGGCGGGGGGTAGGCGCTGCGGTTGGGGTAGTAGGAGTTGTACTGGTGGTTGGGGAAGCCGTGGTCGTGCGAGTTCTGCTGGGGCCC	chr4	133752796	133753020		8
Inflammation_1	ARID1A	TXA0491110	ARID1A_t1_1	CCCAAGCCCGAGGGGAG	CTCGGGAGGGGCCCAA	198	80	CCCAAGCCCGAGGGGAGCCCACGGCCGGGGCCTGCTTCCCCGCAGCCGCCACCCAGCCCACCCCCCGGCCCCGCTGGCCCCAGCCCCCTCCCCGCTCGGCTGTGTACCTGAGGGGTCCGGGCGAGCGGCTGCCCCCCGCCGCCGCTGCTCCCGGGGCTCATGGGCGCGTGGTGGCTCCTTTGTTGGGCCCCTCCCGAG	chr4	133752362	133752559		4
Inflammation_1	ARID1A	TXA0491109	ARID1A_t1_2	TGCTCCCGGGGCTCAT	CACCCTCAACCAACTGCTCA	224	77	TGCTCCCGGGGCTCATGGGCGCGTGGTGGCTCCTTTGTTGGGCCCCTCCCGAGACGgccgctgccgccgccgccgccgccgccgcagccCCCCAGCACTGCGAGGCCATGTCCGCCGGGCCTTTGCCCGCGCCCCCGTCCTGGGGCCCGCCGCCGTAGTCGCCCCCGGGGTAGCCCTGGTAGCCACGGGCCGAGCTGGGCGACGTGAGCAGTTGGTTGAGGGTG	chr4	133752507	133752730		7
Inflammation_1	ARID1A	TXA0491108	ARID1A_t1_3	TGTCCGCCGGGCCTTT	CCCTCCTCCAGCGCCTC	238	76	TGTCCGCCGGGCCTTTGCCCGCGCCCCCGTCCTGGGGCCCGCCGCCGTAGTCGCCCCCGGGGTAGCCCTGGTAGCCACGGGCCGAGCTGGGCGACGTGAGCAGTTGGTTGAGGGTGGGGGTGGCGGTGGGCTGGGGAGTTCCCCCGCCGGCCGCTGAGGGGCCGCCTCCCCCCATGGCCCCGAAGCGCTGCTGTGCGAAGGACGAAGACGACGAGGAGGCAGAGGCGCTGGAGGAGGG	chr4	133752615	133752852		5
Inflammation_1	chr4	TXA0491107	ARID1A_t1_12	GCGGCTGCCTTCATTTC	CAGGGCCGGGTCTCTC	193	77	GCGGCTGCCTTCATTTCCCCGCGCTCGGCCGCTGCCGCCGCCGCCTCGCCCCCCGCCTCCTCCCGCTGTTGCTGCTCGGCTTTCTTCAGCTCCGAGGGCGGCGGCGGCGGGTTGCCCAGGCTGCTGGCGGCGGCGGGGGCGACCTGCGCGGCCATGATCCCCGCTGTCTCGTCCGCGGAGAGACCCGGCCCTG	chr4	133753457	133753649	Assays designed by relax mode and have no off-target hits	8
Inflammation_1	ARID1A	TXA0491106	ARID1A_t1_9	TTGTACTGGTGGTTGGGGAA	GGCGCCTCCTCACTCG	240	74	TTGTACTGGTGGTTGGGGAAGCCGTGGTCGTGCGAGTTCTGCTGGGGCCCGGCGTAGGGCTCCAAGCCCCCGCCGCCGCCGCTCTGCAGCGCTGCCAGGCCAGGGCTTTGTTGTCCGCCATGTTGTTGGTGGAAGACGGCGGCCGCCGCGGCGGCGACGGCAGACGGGCTCCGGCCGTAGGCTTGCCCGAAGCCGTAGGCTGGGGGCGGCAGGGCGGCCGCGGCCGAGTGAGGAGGCGCC	chr4	133752971	133753210		4
Inflammation_1	FBXW7	TXA0491105	FBXW7_t5_1	GGCCATGCAGGGGCTT	CAGCGGGATGCGGTTGA	227	50	GGCCATGCAGGGGCTTGCGGGTCTTTTGTATGAATTTGTAATGTGTCCAATTCCTCTTTGGTAGAGCTGGAGCGGACCAGAGAAGTTGCTGGCTTTAGATGAGCTCATTGACAGCTGTGAACCAACACAAGTGAAGCATATGATGCAAGTGATAGAGCCCCAGTTCCAGCGAGACTTCATCTCCTTGCTTCCTAAAGAGGTAAGGGGCTGTCAACCGCATCCCGCTG	chr3	84965184	84965410		6
Inflammation_1	RELA	TXA0491104	RELA_t7_1	CTGCAGAAGTGTGGTCAGC	CTCTCCGTGCAGAGTCCAG	232	62	CTGCAGAAGTGTGGTCAGCAGGCTGTGGCCTGGACGTGGCGGGCTGGGCGTGGCGGGCGTTAGAGCTCCTGCAGGGTACCCTGAGACCGCTGATGTTTCAGGGGCCCCCAACACTGCCGAGCTCAAGATCTGCCGAGTAAACCGGAACTCTGGGAGCTGCCTCGGTGGGGATGAGATCTTCTTGCTGTGCGACAAGGTGCAGAAAGGTACACACTGGACTCTGCACGGAGAG	chr19	5641080	5641311		4
Inflammation_1	RELA	TXA0491103	RELA_t6_2	CCACCACAGTGTTTTGTTTTTTGTTT	GGTCCCCATTCAGTTCCCAAG	237	54	CCACCACAGtgttttgttttttgtttttgttgtttttttgtttttgACAGTTCCTATAGAGGAGCAGCGCGGGGACTATGACTTGAATGCAGTGCGCCTCTGCTTCCAGGTGACAGTGCGGGACCCAGCAGGCAGGCCCCTCCTCCTGACCCCTGTCCTCTCACATCCGATTTTTGATAACCGTAAGTGGCCGGCTGCAGTAGGGATGAGGGCGGGCTTGGGAACTGAATGGGGACC	chr19	5640253	5640489	One primer sits in the repeat region	1
Inflammation_1	RNF43	TXA0491102	RNF43_t4_1	ATGGAGGAAGGTTGGGTTCTTGA	CTGCAGACCCAAGGCTGA	237	58	ATGGAGGAAGGTTGGGTTCTTGAGCTGGTAGCAGAAGTCAAACAGCCCTGCTGGGGCTTTGTTCTCTGCAGCTGCAGCAGCCCCTGGGGCTGACTAAGCCAGTGGTGCTGATCTGGGGTAGTGATGCTGCGAAGCTGATGGAGTTTGTGTACAAGAATCGGAAGGCCTATGTGTGGATTGAGCTGAAGGAGCCCCCCGCCGGGGTAAGCGTCTCAGGCCTCAGCCTTGGGTCTGCAG	chr11	87727265	87727501		3
Inflammation_1	CTNNB1	TXA0491099	CTNNB1_t2_4	CCATGGAGCCGGACAGAAAAG	TGCTAGCTTCCAAACACAAATGC	232	52	CCATGGAGCCGGACAGAAAAGCTGCTGTCAGCCACTGGCAGCAGCAGTCTTACTTGGATTCTGGAATCCATTCTGGTGCCACCACCACAGCTCCTTCCCTGAGTGGCAAGGGCAACCCTGAGGAAGAAGATGTTGACACCTCCCAAGTCCTTTATGAATGGGAGCAAGGCTTTTCCCAGTCCTTCACGCAAGAGCAAGTAGCTGGTAAAGCATTTGTGTTTGGAAGCTAGCA	chr9	120950546	120950777		5
Inflammation_1	chr19	TXA0491095	RELA_t3_1	GGCCGTGGGGATAGCA	CCCCTGGGGGCTCTTG	216	60	GGCCGTGGGGATAGCACCTGATGGCTGACTGTGTCACCCACAGAGCCAGCCCAGGCTTCTGGGCCTTATGTGGAGATCATCGAACAGCCGAAGCAACGGGGCATGCGATTCCGCTATAAATGCGAGGGGCGCTCAGCGGGCAGTATTCCTGGCGAGAGAAGCACAGATACCACCAAGACACACCCCACCATCAAGGTAAGCAAGAGCCCCCAGGGG	chr19	5638508	5638723		6
Inflammation_1	chr6	TXA0491085	KRAS_t4_2	AGTGTGCCTTAAGAAAGAGTACAA	TGGCAAGCCATCGCATATTAAC	201	35	AGTGTGCCTTAAGAAAGAGTACAAAGTATTCACATAACTGTACACCTTGTCCTTGACTTCTTCTTCTTCTTCTTCCCATCTTTGCTCATCTTTTCTTTATGTTTTCGAATTTCTCGGACTAATGTATAGAAGGCATCGTCAACACCCTGAAATATAAAAAAAAAGTATATATAAGACATGTTAATATGCGATGGCTTGCCA	chr6	145220579	145220779		5
Inflammation_1	chr18	TXA0490898	APC_t16_49	GCTACTGGAGATGGGGTCAGAG	TCGGAAAGGCTTGTGGCTT	219	44	GCTACTGGAGATGGGGTCAGAGCGGGTATACAGTCAGGTGAATTTGAAAAACGAGATACCATTCCTACAGAAGGCAGAAGTACAGATGATGCTCAGCGAGGAAAAATCTCATCTATAGTTACACCAGACCTGGATGACAACAAAGCAGAGGAAGGAGATATTCTTGCAGAATGTATCAATTCTGCTATGCCCAAAGGAAAAAGCCACAAGCCTTTCCGA	chr18	34315054	34315272		7
Inflammation_1	chr18	TXA0490897	APC_t16_69	GGAAGGCGCAAACTCCATAGTAA	GGGCCTTTATTGCTTGTGAATGG	183	49	GGAAGGCGCAAACTCCATAGTAAGTAGTTTGCACCAAGCTGCTGCAGCCGCCGCGTGCTTATCTAGACAAGCGTCATCCGACTCAGATTCCATTCTGTCACTAAAGTCCGGCATTTCTCTGGGATCGCCTTTTCATCTTACACCTGATCAAGAGGAAAAGCCATTCACAAGCAATAAAGGCCC	chr18	34316364	34316546		4
Inflammation_1	chr18	TXA0490896	APC_t16_67	CCTAGAAAAGTGGGTGGCATATT	GTCGGATGACGCTTGTCTA	204	49	CCTAGAAAAGTGGGTGGCATATTAGCTGAAGACCTGACGCTTGATTTGAAAGATCTACAGAGGCCAGATTCAGAACACGCTTTCTCCCCCGACTCAGAAAATTTTGACTGGAAAGCTATTCAGGAAGGCGCAAACTCCATAGTAAGTAGTTTGCACCAAGCTGCTGCAGCCGCCGCGTGCTTATCTAGACAAGCGTCATCCGAC	chr18	34316242	34316445		2
Inflammation_1	chr18	TXA0490895	APC_t16_86	TTGAATCCCTTTCTCCATCTTCT	GCCTTCCGTCATTATACTCGAT	180	53	TTGAATCCCTTTCTCCATCTTCTAGACCAGATTCTCCCACCAGGTCGCAGGCACAGACCCCAGTTTTAAGCCCTTCCCTTCCTGATATGTCTCTGTCCACACATCCATCTGTTCAGGCAGGTGGGTGGCGAAAGCTCCCGCCTAATCTCAGCCCCACTATCGAGTATAATGACGGAAGGC	chr18	34317437	34317616		4
Inflammation_1	chr18	TXA0490894	APC_t16_95	GAATTGAGGACTGCCCCATTAAC	GAGGCGGGTTTCCAGAC	185	53	GAATTGAGGACTGCCCCATTAACAACCCTAGATCTGGACGGTCCCCCACAGGCAACACCCCCCCAGTGATTGACAGTGTTTCAGAGAAGGGAAGTTCAAGCATTAAAGATTCAAAAGACACCCATGGGAAACAGAGTGTGGGCAGTGGCAGTCCTGTGCAAACCGTGGGTCTGGAAACCCGCCTC	chr18	34318031	34318215		6
Inflammation_1	chr18	TXA0490893	APC_t16_3	GTCAGTAATGCATGTGGAACTTTGT	TGGCATCCTTATACTTTGCAGGT	193	46	GTCAGTAATGCATGTGGAACTTTGTGGAATCTCTCAGCAAGAAATCCTAAAGACCAGGAAGCCTTGTGGGACATGGGGGCAGTGAGCATGCTCAAGAACCTCATTCATTCCAAGCACAAAATGATTGCCATGGGAAGTGCAGCAGCTTTAAGGAATCTCATGGCAAACAGACCTGCAAAGTATAAGGATGCCA	chr18	34312075	34312267		4
Inflammation_1	chr18	TXA0490892	APC_t16_58	TGATGACGATGTTGACCTTTCCA	CTGTTTCTGCAGCACTGGTTTG	187	49	TGATGACGATGTTGACCTTTCCAGGGAAAAGGCCGAGTTAAGAAAGGGCAAAGAAAGCAAGGATTCCGAAGCCAAAGTTACCTGCCGCCCAGAACCAAACTCAAGCCAGCAGGCAGCTAGTAAGTCACAAGCCAGTATAAAACATCCAGCAAACAGAGCACAGTCCAAACCAGTGCTGCAGAAACAG	chr18	34315650	34315836		4
Inflammation_1	chr18	TXA0490891	APC_t16_102	GGCCGTCTCAGATCCCTA	AGCTTTTCTACGTTTGTCCTTCT	161	50	GGCCGTCTCAGATCCCTACGCCAGTGAGCACCAACACGAAGAAGAGAGATTCGAAGACTGACAGCACAGAATCCAGTGGAGCCCAAAGTCCTAAACGCCATTCCGGGTCTTACCTCGTGACGTCTGTTTAAAAGAGCTAGAAGGACAAACGTAGAAAAGCT	chr18	34318451	34318611	Assays designed by relax mode and have no off-target hits	8
Inflammation_1	chr18	TXA0490890	APC_t16_73	TCTGAAAACAAAGGAATCAAAGG	GAGCTATTCCGAAGCCCTG	173	44	TCTGAAAACAAAGGAATCAAAGGCGGGAAAAAGGTTTATAAAAGCTTGATTACGGGAAAGATTCGCTCCAATTCAGAAATTTCCAGCCAAATGAAACAACCCCTCCCGACAAACATGCCTTCAATCTCAAGAGGCAGGACGATGATTCACATCCCAGGGCTTCGGAATAGCTC	chr18	34316599	34316771		6
Inflammation_1	chr18	TXA0490889	APC_t16_56	AGCTACCTAACAATGAAGACAGAGTG	TCCTTGCTTTCTTTGCCCTTTCT	190	50	AGCTACCTAACAATGAAGACAGAGTGCGGGGGAGCTTCGCCTTGGACTCACCGCATCACTACACCCCTATTGAGGGGACGCCGTACTGCTTTTCCCGAAATGACTCCTTGAGTTCTCTGGATTTTGATGATGACGATGTTGACCTTTCCAGGGAAAAGGCCGAGTTAAGAAAGGGCAAAGAAAGCAAGGA	chr18	34315523	34315712		2
Inflammation_1	chr18	TXA0490888	APC_t16_100	GTAGCTCCAGCAAGCACA	GGATTCTGTGCTGTCAGTCTT	182	55	GTAGCTCCAGCAAGCACAGCTCACCTAGCGGGACTGTTGCTGCCAGAGTGACACCTTTTAATTACAACCCTAGCCCTAGGAAGAGCAGCGCAGACAGCACTTCAGCCCGGCCGTCTCAGATCCCTACGCCAGTGAGCACCAACACGAAGAAGAGAGATTCGAAGACTGACAGCACAGAATCC	chr18	34318343	34318524		5
Inflammation_1	chr18	TXA0490887	APC_t16_62	CAACTGACGAAAAACTGCAGAA	GGGGTGTCTTCGACGTG	220	45	CAACTGACGAAAAACTGCAGAATTTTGCTATTGAAAATACTCCAGTTTGCTTTTCTCGAAATTCCTCTCTGAGTTCCCTTAGTGACATTGACCAGGAAAACAACAATAACAAAGAAAGTGAACCAATCAAAGAAGCTGAACCTGCCAACTCACAAGGAGAGCCCAGTAAGCCTCAGGCATCCGGGTATGCTCCCAAGTCCTTCCACGTCGAAGACACCCC	chr18	34315883	34316102		3
Inflammation_1	chr18	TXA0490886	APC_t16_11	GGGAAGTTTAGACAGTTCTCGTT	GGTATGAATGGCTGATACTTCTT	184	46	GGGAAGTTTAGACAGTTCTCGTTCTGAGAAAGACAGAAGTTTGGAGAGAGAGCGAGGTATTGGCCTCAGTGCTTACCATCCAACAACAGAAAATGCAGGAACCTCATCAAAACGAGGTCTGCAGATCACTACCACTGCAGCCCAGATAGCCAAAGTTATGGAAGAAGTATCAGCCATTCATACC	chr18	34312560	34312743		6
Inflammation_1	chr18	TXA0490885	APC_t16_54	GCGTGTGAGAAAGAATACAGACTCAA	GTCATTTCGGGAAAAGCAGTACG	220	45	GCGTGTGAGAAAGAATACAGACTCAAAAGTTAATGTAAATACTGAAGAAACTTTCTCAGACAACAAAGACTCAAAGAAACCAAGCTTACAAACCAATGCCAAGGCCTTCAATGAAAAGCTACCTAACAATGAAGACAGAGTGCGGGGGAGCTTCGCCTTGGACTCACCGCATCACTACACCCCTATTGAGGGGACGCCGTACTGCTTTTCCCGAAATGAC	chr18	34315407	34315626		5
Inflammation_1	chr18	TXA0490884	APC_t16_97	CAGAGTGTGGGCAGTGG	TGGAGCTACTGGAACTGAAAG	190	54	CAGAGTGTGGGCAGTGGCAGTCCTGTGCAAACCGTGGGTCTGGAAACCCGCCTCAACTCCTTTGTTCAGGTAGAGGCCCCAGAACAGAAAGGAACTGAGGCAAAACCAGGACAGAGTAACCCAGTCTCTATAGCAGAGACTGCTGAGACGTGTATAGCAGAGCGTACCCCTTTCAGTTCCAGTAGCTCCA	chr18	34318162	34318351		2
Inflammation_1	chr18	TXA0490883	APC_t16_17	TTGCAGTTATGGTCAGTATCCAG	CTATCACATGCTTTGGTCTTGCC	188	41	TTGCAGTTATGGTCAGTATCCAGCTGACCTAGCCCATAAGATACACAGTGCAAATCATATGGATGATAATGATGGAGAACTGGATACACCAATAAATTACAGTCTTAAATATTCAGATGAGCAGTTGAACTCAGGAAGGCAGAGTCCCTCACAGAATGAAAGGTGGGCAAGACCAAAGCATGTGATAG	chr18	34313028	34313215		7
Inflammation_1	chr18	TXA0490882	APC_t16_30	GCGTAGAAGACACCCCAATATGT	GTTTGGCTCTAGCATTCTGGGAC	213	44	GCGTAGAAGACACCCCAATATGTTTTTCAAGGTGCAGTTCATTATCATCACTGTCATCAGCTGACGATGAAATAGGATGTGATCAGACAACACAGGAAGCAGATTCTGCTAATACTCTGCAGACAGCAGAAGTAAAAGAGAATGATGTAACTCGGTCAGCTGAAGATCCTGCAACTGAAGTTCCAGCAGTGTCCCAGAATGCTAGAGCCAAAC	chr18	34313834	34314046		6
Inflammation_1	chr18	TXA0490881	APC_t16_71	TGGGATCGCCTTTTCATCTTACA	GGGTTGTTTCATTTGGCTGGAAA	218	39	TGGGATCGCCTTTTCATCTTACACCTGATCAAGAGGAAAAGCCATTCACAAGCAATAAAGGCCCAAGAATTCTCAAACCTGGAGAGAAAAGCACATTAGAAGCAAAAAAAATAGAATCTGAAAACAAAGGAATCAAAGGCGGGAAAAAGGTTTATAAAAGCTTGATTACGGGAAAGATTCGCTCCAATTCAGAAATTTCCAGCCAAATGAAACAACCC	chr18	34316483	34316700		3
Inflammation_1	chr18	TXA0490880	APC_t16_25	AGAAGAAGAAGAGAGACCGACAA	CTGCTTGGAGAGAGATGTTCAGG	186	34	AGAAGAAGAAGAGAGACCGACAAATTATAGCATAAAATATAATGAAGAGAAACATCATGTGGATCAGCCTATTGATTATAGTTTAAAATATGCCACTGACATTTCTTCCTCACAAAAACCATCATTTTCATTCTCAAAGAATTCATCAGCACAAAGCACTAAACCTGAACATCTCTCTCCAAGCAG	chr18	34313508	34313693		3
Inflammation_1	chr18	TXA0490879	APC_t16_89	AAAGTCCTTCCAGACTACCAATC	GAGCTCACATGCCTTTCATC	181	48	AAAGTCCTTCCAGACTACCAATCAACCGGGCGGGAACCTGGAAGCGTGAACACAGCAAACATTCCTCGTCCCTTCCTCGAGTGAGTACTTGGAGAAGAACTGGAAGCTCATCTTCTATTCTTTCTGCTTCATCAGAGTCCAGTGAAAAAGCAAAAAGTGAGGATGAAAGGCATGTGAGCTC	chr18	34317653	34317833		2
Inflammation_1	chr18	TXA0490878	APC_t16_78	GATCAGGATCTAGAGACTCCACT	AGCTGTCTACCTGGGGATGTAT	217	48	GATCAGGATCTAGAGACTCCACTCCCTCAAGACCTACACAGCAACCATTAAGTAGGCCAATGCAGTCTCCAGGGCGAAACTCAATTTCCCCTGGTAGAAATGGAATAAGCCCTCCTAACAAACTGTCTCAGCTGCCCAGAACATCATCTCCCAGTACTGCTTCAACTAAGTCCTCCGGTTCTGGGAAAATGTCATATACATCCCCAGGTAGACAGCT	chr18	34316954	34317170		4
Inflammation_1	chr18	TXA0490877	APC_t16_38	CACCAAGCAGAAGCAAAACC	AGTGTAACAAAGTATCCACGTCT	177	54	CACCAAGCAGAAGCAAAACCCCTCCACCTCCTCCACAGACAGTGCAGGCCAAGAGAGAGGTGCCAAAAAGTAAAGTCCCTGCTGCTGAGAAGAGAGAGAGTGGGCCTAAGCAGACTGCTGTAAATGCTGCCGTGCAGAGGGTGCAGGTCCTTCCAGACGTGGATACTTTGTTACACT	chr18	34314344	34314520		1
Inflammation_1	chr18	TXA0490876	APC_t16_15	GTGGCAGACGACAGGAGTG	GGCCTCTTTTACCATATCCATCA	190	43	GTGGCAGACGACAGGAGTGCGGCACGAAGAAGCTCTGCCTCCCACACACACTCAAACACATACAACTTCACTAAGTCGGAAAATTCAAATAGGACATGCTCTATGCCTTATGCCAAAGTGGAATATAAACGATCTTCAAATGACAGTTTAAATAGTGTCACTAGTAGTGATGGATATGGTAAAAGAGGCC	chr18	34312789	34312978		8
Inflammation_1	chr18	TXA0490875	APC_t16_80	CTCAGCTGCCCAGAACATCATC	ATTCAGTCCTTTAGATGCCGACT	179	46	CTCAGCTGCCCAGAACATCATCTCCCAGTACTGCTTCAACTAAGTCCTCCGGTTCTGGGAAAATGTCATATACATCCCCAGGTAGACAGCTGAGCCAACAAAATCTTACCAAACAAGCAAGTTTATCCAAGAATGCCAGCAGTATCCCCAGAAGTGAGTCGGCATCTAAAGGACTGAAT	chr18	34317080	34317258		2
Inflammation_1	chr18	TXA0490874	APC_t16_5	TGCCATGGGAAGTGCAG	GGTTGTCAATGTTGTCGAAGGTTT	182	46	TGCCATGGGAAGTGCAGCAGCTTTAAGGAATCTCATGGCAAACAGACCTGCAAAGTATAAGGATGCCAATATCATGTCTCCCGGCTCAAGTCTGCCATCCCTTCACGTTAGGAAACAGAAAGCTCTAGAAGCTGAGCTAGATGCTCAGCATTTATCAGAAACCTTCGACAACATTGACAACC	chr18	34312200	34312381		6
Inflammation_1	chr18	TXA0490873	APC_t16_63	AGTGAACCAATCAAAGAAGCTGA	TGGCATGGCAGAACTTATACACT	195	50	AGTGAACCAATCAAAGAAGCTGAACCTGCCAACTCACAAGGAGAGCCCAGTAAGCCTCAGGCATCCGGGTATGCTCCCAAGTCCTTCCACGTCGAAGACACCCCTGTCTGTTTCTCAAGAAACAGCTCTCTCAGTTCTCTTAGCATTGACTCTGAGGACGACCTGTTACAGGAGTGTATAAGTTCTGCCATGCCA	chr18	34315999	34316193		4
Inflammation_1	chr18	TXA0490872	APC_t16_99	GAAAGGAACTGAGGCAAAACC	TGTAATTAAAAGGTGTCACTCTGG	161	50	GAAAGGAACTGAGGCAAAACCAGGACAGAGTAACCCAGTCTCTATAGCAGAGACTGCTGAGACGTGTATAGCAGAGCGTACCCCTTTCAGTTCCAGTAGCTCCAGCAAGCACAGCTCACCTAGCGGGACTGTTGCTGCCAGAGTGACACCTTTTAATTACA	chr18	34318248	34318408	Multiple hits	4
Inflammation_1	chr18	TXA0490871	APC_t16_52	GTCCAACAAGCATCCTCGACTTC	GGCATTGGTTTGTAAGCTTGGTT	213	38	GTCCAACAAGCATCCTCGACTTCATCTGGAGCTAACAAAAATCAAGTAGACACTAAGAAAAAGAAGCCTACTTCACCAGTAAAGCCCATGCCACAAAATACTGAATATAGAACGCGTGTGAGAAAGAATACAGACTCAAAAGTTAATGTAAATACTGAAGAAACTTTCTCAGACAACAAAGACTCAAAGAAACCAAGCTTACAAACCAATGCC	chr18	34315294	34315506		7
Inflammation_1	chr18	TXA0490870	APC_t16_23	TCGAATGGGTTCTAGTCATGCAA	AACTATAATCAATAGGCTGATCCACA	206	34	TCGAATGGGTTCTAGTCATGCAATTAATCAAAATGTAAACCAGTCTCTGTGTCAGGAAGATGATTATGAAGATGATAAACCTACCAACTACAGTGAACGTTATTCTGAGGAAGAACAACATGAAGAAGAAGAAGAGAGACCGACAAATTATAGCATAAAATATAATGAAGAGAAACATCATGTGGATCAGCCTATTGATTATAGTT	chr18	34313385	34313590		6
Inflammation_1	chr18	TXA0490869	APC_t16_47	TGTTAGCTTTACACCAGGGGATG	AGCATCATCTGTACTTCTGCCTT	214	46	TGTTAGCTTTACACCAGGGGATGATGTGCCCCGGGTGTACTGTGTAGAAGGGACACCTATAAACTTTTCCACAGCAACGTCTCTAAGTGATCTGACAATAGAGTCCCCTCCAAATGAATTGGCTACTGGAGATGGGGTCAGAGCGGGTATACAGTCAGGTGAATTTGAAAAACGAGATACCATTCCTACAGAAGGCAGAAGTACAGATGATGCT	chr18	34314933	34315146		4
Inflammation_1	chr18	TXA0490868	APC_t16_91	TCATCAGAGTCCAGTGAAAAAGCA	CAGCACCACTGGCAGCA	187	51	TCATCAGAGTCCAGTGAAAAAGCAAAAAGTGAGGATGAAAGGCATGTGAGCTCCATGCCAGCACCCAGACAGATGAAGGAAAACCAGGTGCCCACCAAAGGAACATGGAGGAAAATCAAGGAAAGTGACATTTCTCCCACAGGCATGGCTTCTCAGAGCGCTTCCTCAGGTGCTGCCAGTGGTGCTG	chr18	34317781	34317967		5
Inflammation_1	chr18	TXA0490867	APC_t16_9	TGACTATGCTTTTGACGCCAATC	GATGGTAAGCACTGAGGCCAATA	203	42	TGACTATGCTTTTGACGCCAATCGACATGATGATAGTAGGTCAGACAATTTCAATACTGGAAACATGACTGTTCTTTCACCATATTTAAATACTACGGTATTGCCCAGCTCTTCTTCCTCAAGGGGAAGTTTAGACAGTTCTCGTTCTGAGAAAGACAGAAGTTTGGAGAGAGAGCGAGGTATTGGCCTCAGTGCTTACCATC	chr18	34312437	34312639		2
Inflammation_1	chr18	TXA0490866	APC_t16_82	ACAAGCAAGTTTATCCAAGAATGCC	AAAGTAGACTGGCGTACTAATGC	189	41	ACAAGCAAGTTTATCCAAGAATGCCAGCAGTATCCCCAGAAGTGAGTCGGCATCTAAAGGACTGAATCAGATGAGTAACGGCAATGGGTCAAATAAAAAGGTAGAACTTTCTAGAATGTCTTCAACTAAATCAAGTGGAAGTGAATCAGACAGATCAGAAAGGCCTGCATTAGTACGCCAGTCTACTTT	chr18	34317192	34317380		3
Inflammation_1	chr18	TXA0490865	APC_t16_93	AGGAACATGGAGGAAAATCAAGGA	GGGGTGTTGCCTGTGGG	213	52	AGGAACATGGAGGAAAATCAAGGAAAGTGACATTTCTCCCACAGGCATGGCTTCTCAGAGCGCTTCCTCAGGTGCTGCCAGTGGTGCTGAATCCAAGCCTCTGATCTATCAGATGGCACCTCCTGTCTCTAAAACAGAGGATGTTTGGGTGAGAATTGAGGACTGCCCCATTAACAACCCTAGATCTGGACGGTCCCCCACAGGCAACACCCC	chr18	34317879	34318091		4
Inflammation_1	chr18	TXA0490864	APC_t16_42	CAGAACAGCCTGAGGAATCAAATG	GGTAGCTGACTTGGTTTCCTTGC	220	40	CAGAACAGCCTGAGGAATCAAATGAAAACCAGGATAAAGAGGTAGAAAAGCCTGACTCTGAAAAAGACTTATTAGATGATTCTGATGACGATGATATTGAAATATTAGAAGAATGTATTATTTCAGCCATGCCAACAAAGTCATCACGCAAAGCCAAAAAACTAGCCCAGACTGCTTCAAAATTACCTCCACCTGTGGCAAGGAAACCAAGTCAGCTACC	chr18	34314665	34314884		6
Inflammation_1	chr18	TXA0490863	APC_t16_34	AAAGCTGTTGAGTTTTCTTCAGG	TCACTGGGGCTTATGATGC	218	51	AAAGCTGTTGAGTTTTCTTCAGGAGCCAAGTCTCCCTCCAAAAGTGGTGCTCAGACACCCAAAAGTCCCCCAGAACACTATGTCCAGGAGACTCCGCTCGTATTCAGCAGGTGTACTTCTGTCAGCTCCCTTGACAGTTTTGAGAGTCGCTCCATTGCCAGCTCTGTTCAGAGTGAGCCATGTAGTGGAATGGTGAGTGGCATCATAAGCCCCAGTGA	chr18	34314097	34314314		3
Inflammation_1	chr18	TXA0490862	APC_t16_36	TCCCTTGACAGTTTTGAGAGTCG	CCTCTCTCTTGGCCTGCAC	181	55	TCCCTTGACAGTTTTGAGAGTCGCTCCATTGCCAGCTCTGTTCAGAGTGAGCCATGTAGTGGAATGGTGAGTGGCATCATAAGCCCCAGTGACCTTCCAGATAGTCCTGGGCAGACCATGCCACCAAGCAGAAGCAAAACCCCTCCACCTCCTCCACAGACAGTGCAGGCCAAGAGAGAGG	chr18	34314223	34314403		4
Inflammation_1	chr18	TXA0490861	APC_t16_87	CTTCCTGATATGTCTCTGTCCAC	TTCACGCTTCCAGGTTCC	189	53	CTTCCTGATATGTCTCTGTCCACACATCCATCTGTTCAGGCAGGTGGGTGGCGAAAGCTCCCGCCTAATCTCAGCCCCACTATCGAGTATAATGACGGAAGGCCCACAAAACGGCATGATATTGCACGCTCCCATTCTGAAAGTCCTTCCAGACTACCAATCAACCGGGCGGGAACCTGGAAGCGTGAA	chr18	34317514	34317702		6
Inflammation_1	chr18	TXA0490860	APC_t16_65	AGCTCTCTCAGTTCTCTTAGCAT	AATCTGGCCTCTGTAGATCTTTC	190	45	AGCTCTCTCAGTTCTCTTAGCATTGACTCTGAGGACGACCTGTTACAGGAGTGTATAAGTTCTGCCATGCCAAAAAAGAAAAGGCCTTCAAGACTCAAGAGTGAGAGCGAAAAGCAGAGCCCTAGAAAAGTGGGTGGCATATTAGCTGAAGACCTGACGCTTGATTTGAAAGATCTACAGAGGCCAGATT	chr18	34316122	34316311		7
Inflammation_1	chr18	TXA0490859	APC_t16_32	CAGACAGCAGAAGTAAAAGAGAA	GTGTCTGAGCACCACTTTTG	202	48	CAGACAGCAGAAGTAAAAGAGAATGATGTAACTCGGTCAGCTGAAGATCCTGCAACTGAAGTTCCAGCAGTGTCCCAGAATGCTAGAGCCAAACCCAGCCGACTCCAGGCTTCTGGCTTATCTTCAGAATCAACCAGGCATAATAAAGCTGTTGAGTTTTCTTCAGGAGCCAAGTCTCCCTCCAAAAGTGGTGCTCAGACAC	chr18	34313953	34314154		8
Inflammation_1	chr18	TXA0490858	APC_t16_39	GCAGACTGCTGTAAATGCTG	GTTTTCCTGAACTGGAGGCAT	190	48	GCAGACTGCTGTAAATGCTGCCGTGCAGAGGGTGCAGGTCCTTCCAGACGTGGATACTTTGTTACACTTCGCCACAGAAAGTACTCCAGACGGGTTTTCTTGTTCCTCCAGCCTAAGTGCTCTGAGCCTGGATGAGCCATTTATACAGAAAGATGTAGAATTAAGAATCATGCCTCCAGTTCAGGAAAAC	chr18	34314453	34314642		5
Inflammation_1	chr18	TXA0490857	APC_t16_21	CAGAACACCAGTTATCCTGTCTA	AGTTGGTAGGTTTATCATCTTCA	217	39	CAGAACACCAGTTATCCTGTCTATTCTGAGAATACCGATGACAAACACCTCAAATTCCAACCACATTTTGGACAACAAGAATGTGTTTCCCCATATAGGTCAAGGGGAACCAGTGGTTCAGAAACAAATCGAATGGGTTCTAGTCATGCAATTAATCAAAATGTAAACCAGTCTCTGTGTCAGGAAGATGATTATGAAGATGATAAACCTACCAACT	chr18	34313257	34313473		4
Inflammation_1	chr18	TXA0490856	APC_t16_26	GCCACTGACATTTCTTCCTCACA	TTTCTTGGTTGATGGAGGGGACT	220	44	GCCACTGACATTTCTTCCTCACAAAAACCATCATTTTCATTCTCAAAGAATTCATCAGCACAAAGCACTAAACCTGAACATCTCTCTCCAAGCAGCGAGAATACAGCTGTACCTCCATCTAATGCCAAAAGGCAGAATCAGCTGCGTCCAAGTTCAGCACAAAGAAATGGCCAGACTCAAAAAGGCACTACTTGCAAAGTCCCCTCCATCAACCAAGAAA	chr18	34313599	34313818		5
Inflammation_1	chr18	TXA0490855	APC_t16_44	CAACAAAGTCATCACGCAAAGC	AGAGACGTTGCTGTGGAAAAGT	220	47	CAACAAAGTCATCACGCAAAGCCAAAAAACTAGCCCAGACTGCTTCAAAATTACCTCCACCTGTGGCAAGGAAACCAAGTCAGCTACCTGTGTATAAACTTCTGCCAGCACAGAATAGGCTGCAGGCACAAAAACATGTTAGCTTTACACCAGGGGATGATGTGCCCCGGGTGTACTGTGTAGAAGGGACACCTATAAACTTTTCCACAGCAACGTCTCT	chr18	34314797	34315016		2
Inflammation_1	chr18	TXA0490854	APC_t16_28	CATCTAATGCCAAAAGGCAGAAT	GTGATGATAATGAACTGCACCTT	171	43	CATCTAATGCCAAAAGGCAGAATCAGCTGCGTCCAAGTTCAGCACAAAGAAATGGCCAGACTCAAAAAGGCACTACTTGCAAAGTCCCCTCCATCAACCAAGAAACAATACAGACTTACTGCGTAGAAGACACCCCAATATGTTTTTCAAGGTGCAGTTCATTATCATCAC	chr18	34313714	34313884		8
Inflammation_1	chr18	TXA0490853	APC_t16_13	CTCATCAAAACGAGGTCTGC	TATGTGTTTGAGTGTGTGTGGGA	189	51	CTCATCAAAACGAGGTCTGCAGATCACTACCACTGCAGCCCAGATAGCCAAAGTTATGGAAGAAGTATCAGCCATTCATACCTCCCAGGACGACAGAAGTTCTGCTTCTACCACCGAGTTCCATTGTGTGGCAGACGACAGGAGTGCGGCACGAAGAAGCTCTGCCTCCCACACACACTCAAACACATA	chr18	34312662	34312850		7
Inflammation_1	chr18	TXA0490852	APC_t16_76	GTGAAGGGCCGGGAGCTA	TGGAGACTGCATTGGCCTACTTA	188	51	GTGAAGGGCCGGGAGCTACCACTTCTCCTCGAGGAACTAAGCCAGCAGGAAAGTCAGAGCTTAGCCCTATCACCAGGCAAACTTCCCAAATCAGTGGGTCAAATAAGGGGTCTTCTAGATCAGGATCTAGAGACTCCACTCCCTCAAGACCTACACAGCAACCATTAAGTAGGCCAATGCAGTCTCCA	chr18	34316837	34317024		8
Inflammation_1	chr18	TXA0490851	APC_t16_84	TGGAAGTGAATCAGACAGATCAGAA	GAAGGGCTTAAAACTGGGGTCT	186	50	TGGAAGTGAATCAGACAGATCAGAAAGGCCTGCATTAGTACGCCAGTCTACTTTCATCAAAGAAGCCCCAAGCCCAACCCTGAGGAGGAAACTGGAGGAATCTGCCTCATTTGAATCCCTTTCTCCATCTTCTAGACCAGATTCTCCCACCAGGTCGCAGGCACAGACCCCAGTTTTAAGCCCTTC	chr18	34317327	34317512		8
Inflammation_1	chr18	TXA0490850	APC_t16_75	AATCTCAAGAGGCAGGACGATGA	TAGGGCTAAGCTCTGACTTTCCT	185	54	AATCTCAAGAGGCAGGACGATGATTCACATCCCAGGGCTTCGGAATAGCTCCTCTAGTACAAGCCCTGTCTCTAAGAAAGGCCCACCCCTCAAGACTCCAGCCTCTAAAAGCCCCAGTGAAGGGCCGGGAGCTACCACTTCTCCTCGAGGAACTAAGCCAGCAGGAAAGTCAGAGCTTAGCCCTA	chr18	34316721	34316905		2
Inflammation_1	chr18	TXA0490849	APC_t16_60	CAGCTAGTAAGTCACAAGCCAGT	TCACTAAGGGAACTCAGAGAGGA	205	46	CAGCTAGTAAGTCACAAGCCAGTATAAAACATCCAGCAAACAGAGCACAGTCCAAACCAGTGCTGCAGAAACAGCCCACTTTCCCCCAGTCCTCCAAAGACGGACCAGATAGAGGGGCAGCAACTGACGAAAAACTGCAGAATTTTGCTATTGAAAATACTCCAGTTTGCTTTTCTCGAAATTCCTCTCTGAGTTCCCTTAGTGA	chr18	34315763	34315967		6
Inflammation_1	chr18	TXA0490848	APC_t16_19	AGATGAGCAGTTGAACTCAGGAA	TTCTTGTTGTCCAAAATGTGGTT	196	42	AGATGAGCAGTTGAACTCAGGAAGGCAGAGTCCCTCACAGAATGAAAGGTGGGCAAGACCAAAGCATGTGATAGAAGATGAAATAAAGCAAAACGAGCAAAGACAAGCAAGAAGCCAGAACACCAGTTATCCTGTCTATTCTGAGAATACCGATGACAAACACCTCAAATTCCAACCACATTTTGGACAACAAGAA	chr18	34313142	34313337		3
Inflammation_1	chr18	TXA0490847	APC_t16_1	ACTCTTTTCTGCCCCTTTACTTGT	CACAAGGCTTCCTGGTCTTTAGG	214	38	ACTCTTTTCTGCCCCTTTACTTGTTGTCACTAATCACATTTTCCCCTTAATCTCATGTGTTTTTGTTTTAATTCAGGCAAATCCTAAGAGAGAACAATTGCCTACAAACTTTATTACAGCACTTGAAATCTCACAGCTTGACAATAGTCAGTAATGCATGTGGAACTTTGTGGAATCTCTCAGCAAGAAATCCTAAAGACCAGGAAGCCTTGTG	chr18	34311929	34312142		3
Inflammation_1	chr18	TXA0490846	APC_t16_51	CCAGACCTGGATGACAACAAA	GGCTTCTTTTTCTTAGTGTCTACTT	185	42	CCAGACCTGGATGACAACAAAGCAGAGGAAGGAGATATTCTTGCAGAATGTATCAATTCTGCTATGCCCAAAGGAAAAAGCCACAAGCCTTTCCGAGTGAAAAAGATAATGGACCAAGTCCAACAAGCATCCTCGACTTCATCTGGAGCTAACAAAAATCAAGTAGACACTAAGAAAAAGAAGCC	chr18	34315177	34315361		2
Inflammation_1	chr18	TXA0490845	APC_t16_7	ACGTTAGGAAACAGAAAGCTCTA	TGAAATTGTCTGACCTACTATCATC	186	44	ACGTTAGGAAACAGAAAGCTCTAGAAGCTGAGCTAGATGCTCAGCATTTATCAGAAACCTTCGACAACATTGACAACCTAAGTCCCAAGGCCTCTCACCGGAGTAAGCAGAGACACAAGCAGAATCTTTATGGTGACTATGCTTTTGACGCCAATCGACATGATGATAGTAGGTCAGACAATTTCA	chr18	34312304	34312489		7
Inflammation_1	APC	TXA0490844	APC_t16_46	AACTTCTGCCAGCACAGAATAGG	GCCTTCTGTAGGAATGGTATCTCG	236	47	AACTTCTGCCAGCACAGAATAGGCTGCAGGCACAAAAACATGTTAGCTTTACACCAGGGGATGATGTGCCCCGGGTGTACTGTGTAGAAGGGACACCTATAAACTTTTCCACAGCAACGTCTCTAAGTGATCTGACAATAGAGTCCCCTCCAAATGAATTGGCTACTGGAGATGGGGTCAGAGCGGGTATACAGTCAGGTGAATTTGAAAAACGAGATACCATTCCTACAGAAGGC	chr18	34314893	34315128		1
Inflammation_1	APC	TXA0490843	APC_t16_31	AGGATGTGATCAGACAACACAGG	TGGCTCCTGAAGAAAACTCAACA	218	46	AGGATGTGATCAGACAACACAGGAAGCAGATTCTGCTAATACTCTGCAGACAGCAGAAGTAAAAGAGAATGATGTAACTCGGTCAGCTGAAGATCCTGCAACTGAAGTTCCAGCAGTGTCCCAGAATGCTAGAGCCAAACCCAGCCGACTCCAGGCTTCTGGCTTATCTTCAGAATCAACCAGGCATAATAAAGCTGTTGAGTTTTCTTCAGGAGCCA	chr18	34313907	34314124		7
Inflammation_1	APC	TXA0490842	APC_t16_64	ATCAAAGAAGCTGAACCTGCCAA	CTCTGCTTTTCGCTCTCACTCTT	233	49	ATCAAAGAAGCTGAACCTGCCAACTCACAAGGAGAGCCCAGTAAGCCTCAGGCATCCGGGTATGCTCCCAAGTCCTTCCACGTCGAAGACACCCCTGTCTGTTTCTCAAGAAACAGCTCTCTCAGTTCTCTTAGCATTGACTCTGAGGACGACCTGTTACAGGAGTGTATAAGTTCTGCCATGCCAAAAAAGAAAAGGCCTTCAAGACTCAAGAGTGAGAGCGAAAAGCAGAG	chr18	34316008	34316240		1
Inflammation_1	APC	TXA0490841	APC_t16_59	AGGATTCCGAAGCCAAAGTTACC	AGGAATTTCGAGAAAAGCAAACTGG	240	48	AGGATTCCGAAGCCAAAGTTACCTGCCGCCCAGAACCAAACTCAAGCCAGCAGGCAGCTAGTAAGTCACAAGCCAGTATAAAACATCCAGCAAACAGAGCACAGTCCAAACCAGTGCTGCAGAAACAGCCCACTTTCCCCCAGTCCTCCAAAGACGGACCAGATAGAGGGGCAGCAACTGACGAAAAACTGCAGAATTTTGCTATTGAAAATACTCCAGTTTGCTTTTCTCGAAATTCCT	chr18	34315709	34315948		5
Inflammation_1	APC	TXA0490840	APC_t16_81	GTCCTCCGGTTCTGGGAAAATG	AATGCAGGCCTTTCTGATCTGTC	240	43	GTCCTCCGGTTCTGGGAAAATGTCATATACATCCCCAGGTAGACAGCTGAGCCAACAAAATCTTACCAAACAAGCAAGTTTATCCAAGAATGCCAGCAGTATCCCCAGAAGTGAGTCGGCATCTAAAGGACTGAATCAGATGAGTAACGGCAATGGGTCAAATAAAAAGGTAGAACTTTCTAGAATGTCTTCAACTAAATCAAGTGGAAGTGAATCAGACAGATCAGAAAGGCCTGCATT	chr18	34317123	34317362		5
Inflammation_1	APC	TXA0490839	APC_t16_43	ACCAGGATAAAGAGGTAGAAAAGCC	CTATTCTGTGCTGGCAGAAGTTT	223	39	ACCAGGATAAAGAGGTAGAAAAGCCTGACTCTGAAAAAGACTTATTAGATGATTCTGATGACGATGATATTGAAATATTAGAAGAATGTATTATTTCAGCCATGCCAACAAAGTCATCACGCAAAGCCAAAAAACTAGCCCAGACTGCTTCAAAATTACCTCCACCTGTGGCAAGGAAACCAAGTCAGCTACCTGTGTATAAACTTCTGCCAGCACAGAATAG	chr18	34314692	34314914		7
Inflammation_1	APC	TXA0490838	APC_t16_68	TGAAGACCTGACGCTTGATTTGA	TGTAAGATGAAAAGGCGATCCCA	238	47	TGAAGACCTGACGCTTGATTTGAAAGATCTACAGAGGCCAGATTCAGAACACGCTTTCTCCCCCGACTCAGAAAATTTTGACTGGAAAGCTATTCAGGAAGGCGCAAACTCCATAGTAAGTAGTTTGCACCAAGCTGCTGCAGCCGCCGCGTGCTTATCTAGACAAGCGTCATCCGACTCAGATTCCATTCTGTCACTAAAGTCCGGCATTTCTCTGGGATCGCCTTTTCATCTTACA	chr18	34316268	34316505		5
Inflammation_1	APC	TXA0490837	APC_t16_50	TGCTCAGCGAGGAAAAATCTCAT	ATGGGCTTTACTGGTGAAGTAGG	240	42	TGCTCAGCGAGGAAAAATCTCATCTATAGTTACACCAGACCTGGATGACAACAAAGCAGAGGAAGGAGATATTCTTGCAGAATGTATCAATTCTGCTATGCCCAAAGGAAAAAGCCACAAGCCTTTCCGAGTGAAAAAGATAATGGACCAAGTCCAACAAGCATCCTCGACTTCATCTGGAGCTAACAAAAATCAAGTAGACACTAAGAAAAAGAAGCCTACTTCACCAGTAAAGCCCAT	chr18	34315143	34315382		8
Inflammation_1	APC	TXA0490836	APC_t16_55	ACTTTCTCAGACAACAAAGACTCA	TTCTTAACTCGGCCTTTTCCCTG	238	47	ACTTTCTCAGACAACAAAGACTCAAAGAAACCAAGCTTACAAACCAATGCCAAGGCCTTCAATGAAAAGCTACCTAACAATGAAGACAGAGTGCGGGGGAGCTTCGCCTTGGACTCACCGCATCACTACACCCCTATTGAGGGGACGCCGTACTGCTTTTCCCGAAATGACTCCTTGAGTTCTCTGGATTTTGATGATGACGATGTTGACCTTTCCAGGGAAAAGGCCGAGTTAAGAA	chr18	34315456	34315693		3
Inflammation_1	APC	TXA0490835	APC_t16_40	GTGCAGGTCCTTCCAGACG	AGAGTCAGGCTTTTCTACCTCTT	240	44	GTGCAGGTCCTTCCAGACGTGGATACTTTGTTACACTTCGCCACAGAAAGTACTCCAGACGGGTTTTCTTGTTCCTCCAGCCTAAGTGCTCTGAGCCTGGATGAGCCATTTATACAGAAAGATGTAGAATTAAGAATCATGCCTCCAGTTCAGGAAAACGACAATGGGAATGAAACTGAATCAGAACAGCCTGAGGAATCAAATGAAAACCAGGATAAAGAGGTAGAAAAGCCTGACTCT	chr18	34314484	34314723		8
Inflammation_1	APC	TXA0490834	APC_t16_18	AGCCCATAAGATACACAGTGCAAA	TCTCAGAATAGACAGGATAACTGGT	230	40	AGCCCATAAGATACACAGTGCAAATCATATGGATGATAATGATGGAGAACTGGATACACCAATAAATTACAGTCTTAAATATTCAGATGAGCAGTTGAACTCAGGAAGGCAGAGTCCCTCACAGAATGAAAGGTGGGCAAGACCAAAGCATGTGATAGAAGATGAAATAAAGCAAAACGAGCAAAGACAAGCAAGAAGCCAGAACACCAGTTATCCTGTCTATTCTGAGA	chr18	34313058	34313287		6
Inflammation_1	chr18	TXA0490833	APC_t16_41	AGCCTGGATGAGCCATTTATAC	TGTTGGCATGGCTGAAATAATAC	225	36	AGCCTGGATGAGCCATTTATACAGAAAGATGTAGAATTAAGAATCATGCCTCCAGTTCAGGAAAACGACAATGGGAATGAAACTGAATCAGAACAGCCTGAGGAATCAAATGAAAACCAGGATAAAGAGGTAGAAAAGCCTGACTCTGAAAAAGACTTATTAGATGATTCTGATGACGATGATATTGAAATATTAGAAGAATGTATTATTTCAGCCATGCCAACA	chr18	34314577	34314801		4
Inflammation_1	APC	TXA0490832	APC_t16_10	TGGAAACATGACTGTTCTTTCACC	TCTTCCATAACTTTGGCTATCTGGG	231	45	TGGAAACATGACTGTTCTTTCACCATATTTAAATACTACGGTATTGCCCAGCTCTTCTTCCTCAAGGGGAAGTTTAGACAGTTCTCGTTCTGAGAAAGACAGAAGTTTGGAGAGAGAGCGAGGTATTGGCCTCAGTGCTTACCATCCAACAACAGAAAATGCAGGAACCTCATCAAAACGAGGTCTGCAGATCACTACCACTGCAGCCCAGATAGCCAAAGTTATGGAAGA	chr18	34312494	34312724		3
Inflammation_1	APC	TXA0490831	APC_t16_85	ACTGGAGGAATCTGCCTCATTTG	TTTCAGAATGGGAGCGTGCAATA	239	51	ACTGGAGGAATCTGCCTCATTTGAATCCCTTTCTCCATCTTCTAGACCAGATTCTCCCACCAGGTCGCAGGCACAGACCCCAGTTTTAAGCCCTTCCCTTCCTGATATGTCTCTGTCCACACATCCATCTGTTCAGGCAGGTGGGTGGCGAAAGCTCCCGCCTAATCTCAGCCCCACTATCGAGTATAATGACGGAAGGCCCACAAAACGGCATGATATTGCACGCTCCCATTCTGAAA	chr18	34317417	34317655		1
Inflammation_1	APC	TXA0490830	APC_t16_77	GGGAGCTACCACTTCTCCTCG	GCTGAGACAGTTTGTTAGGAGGG	239	49	GGGAGCTACCACTTCTCCTCGAGGAACTAAGCCAGCAGGAAAGTCAGAGCTTAGCCCTATCACCAGGCAAACTTCCCAAATCAGTGGGTCAAATAAGGGGTCTTCTAGATCAGGATCTAGAGACTCCACTCCCTCAAGACCTACACAGCAACCATTAAGTAGGCCAATGCAGTCTCCAGGGCGAAACTCAATTTCCCCTGGTAGAAATGGAATAAGCCCTCCTAACAAACTGTCTCAGC	chr18	34316847	34317085		6
Inflammation_1	APC	TXA0490829	APC_t16_8	CAACCTAAGTCCCAAGGCCTCTC	CGCTCTCTCTCCAAACTTCTGTC	237	43	CAACCTAAGTCCCAAGGCCTCTCACCGGAGTAAGCAGAGACACAAGCAGAATCTTTATGGTGACTATGCTTTTGACGCCAATCGACATGATGATAGTAGGTCAGACAATTTCAATACTGGAAACATGACTGTTCTTTCACCATATTTAAATACTACGGTATTGCCCAGCTCTTCTTCCTCAAGGGGAAGTTTAGACAGTTCTCGTTCTGAGAAAGACAGAAGTTTGGAGAGAGAGCG	chr18	34312377	34312613		5
Inflammation_1	APC	TXA0490828	APC_t16_90	GAACACAGCAAACATTCCTCGTC	TGGGAGAAATGTCACTTTCCTTGA	220	46	GAACACAGCAAACATTCCTCGTCCCTTCCTCGAGTGAGTACTTGGAGAAGAACTGGAAGCTCATCTTCTATTCTTTCTGCTTCATCAGAGTCCAGTGAAAAAGCAAAAAGTGAGGATGAAAGGCATGTGAGCTCCATGCCAGCACCCAGACAGATGAAGGAAAACCAGGTGCCCACCAAAGGAACATGGAGGAAAATCAAGGAAAGTGACATTTCTCCCA	chr18	34317700	34317919		3
Inflammation_1	APC	TXA0490827	APC_t16_12	ATGCAGGAACCTCATCAAAACGA	TCCGACTTAGTGAAGTTGTATGTG	217	50	ATGCAGGAACCTCATCAAAACGAGGTCTGCAGATCACTACCACTGCAGCCCAGATAGCCAAAGTTATGGAAGAAGTATCAGCCATTCATACCTCCCAGGACGACAGAAGTTCTGCTTCTACCACCGAGTTCCATTGTGTGGCAGACGACAGGAGTGCGGCACGAAGAAGCTCTGCCTCCCACACACACTCAAACACATACAACTTCACTAAGTCGGA	chr18	34312652	34312868		4
Inflammation_1	APC	TXA0490826	APC_t16_74	CCGACAAACATGCCTTCAATCTC	TTTGGGAAGTTTGCCTGGTGATA	223	53	CCGACAAACATGCCTTCAATCTCAAGAGGCAGGACGATGATTCACATCCCAGGGCTTCGGAATAGCTCCTCTAGTACAAGCCCTGTCTCTAAGAAAGGCCCACCCCTCAAGACTCCAGCCTCTAAAAGCCCCAGTGAAGGGCCGGGAGCTACCACTTCTCCTCGAGGAACTAAGCCAGCAGGAAAGTCAGAGCTTAGCCCTATCACCAGGCAAACTTCCCAAA	chr18	34316704	34316926		5
Inflammation_1	APC	TXA0490825	APC_t16_48	TCCCCTCCAAATGAATTGGCTAC	GCTTTTTCCTTTGGGCATAGCAG	222	44	TCCCCTCCAAATGAATTGGCTACTGGAGATGGGGTCAGAGCGGGTATACAGTCAGGTGAATTTGAAAAACGAGATACCATTCCTACAGAAGGCAGAAGTACAGATGATGCTCAGCGAGGAAAAATCTCATCTATAGTTACACCAGACCTGGATGACAACAAAGCAGAGGAAGGAGATATTCTTGCAGAATGTATCAATTCTGCTATGCCCAAAGGAAAAAGC	chr18	34315036	34315257		5
Inflammation_1	APC	TXA0490824	APC_t16_14	TTCTACCACCGAGTTCCATTGTG	AGGATTCAACTGAGGGTTTCATT	236	43	TTCTACCACCGAGTTCCATTGTGTGGCAGACGACAGGAGTGCGGCACGAAGAAGCTCTGCCTCCCACACACACTCAAACACATACAACTTCACTAAGTCGGAAAATTCAAATAGGACATGCTCTATGCCTTATGCCAAAGTGGAATATAAACGATCTTCAAATGACAGTTTAAATAGTGTCACTAGTAGTGATGGATATGGTAAAAGAGGCCAAATGAAACCCTCAGTTGAATCCT	chr18	34312767	34313002		1
Inflammation_1	APC	TXA0490823	APC_t16_4	GCATGTGGAACTTTGTGGAATCT	TGTTTCCTAACGTGAAGGGATGG	233	47	GCATGTGGAACTTTGTGGAATCTCTCAGCAAGAAATCCTAAAGACCAGGAAGCCTTGTGGGACATGGGGGCAGTGAGCATGCTCAAGAACCTCATTCATTCCAAGCACAAAATGATTGCCATGGGAAGTGCAGCAGCTTTAAGGAATCTCATGGCAAACAGACCTGCAAAGTATAAGGATGCCAATATCATGTCTCCCGGCTCAAGTCTGCCATCCCTTCACGTTAGGAAACA	chr18	34312084	34312316		8
Inflammation_1	APC	TXA0490822	APC_t16_88	TCTGTCCACACATCCATCTGTTC	TGAGCTTCCAGTTCTTCTCCAAG	235	53	TCTGTCCACACATCCATCTGTTCAGGCAGGTGGGTGGCGAAAGCTCCCGCCTAATCTCAGCCCCACTATCGAGTATAATGACGGAAGGCCCACAAAACGGCATGATATTGCACGCTCCCATTCTGAAAGTCCTTCCAGACTACCAATCAACCGGGCGGGAACCTGGAAGCGTGAACACAGCAAACATTCCTCGTCCCTTCCTCGAGTGAGTACTTGGAGAAGAACTGGAAGCTCA	chr18	34317528	34317762		7
Inflammation_1	APC	TXA0490821	APC_t16_61	CTCCAAAGACGGACCAGATAGAG	GTGGAAGGACTTGGGAGCATAC	235	46	CTCCAAAGACGGACCAGATAGAGGGGCAGCAACTGACGAAAAACTGCAGAATTTTGCTATTGAAAATACTCCAGTTTGCTTTTCTCGAAATTCCTCTCTGAGTTCCCTTAGTGACATTGACCAGGAAAACAACAATAACAAAGAAAGTGAACCAATCAAAGAAGCTGAACCTGCCAACTCACAAGGAGAGCCCAGTAAGCCTCAGGCATCCGGGTATGCTCCCAAGTCCTTCCAC	chr18	34315854	34316088		8
Inflammation_1	APC	TXA0490820	APC_t16_27	TCTCAAAGAATTCATCAGCACAAAGC	ATATTGGGGTGTCTTCTACGCAGT	216	44	TCTCAAAGAATTCATCAGCACAAAGCACTAAACCTGAACATCTCTCTCCAAGCAGCGAGAATACAGCTGTACCTCCATCTAATGCCAAAAGGCAGAATCAGCTGCGTCCAAGTTCAGCACAAAGAAATGGCCAGACTCAAAAAGGCACTACTTGCAAAGTCCCCTCCATCAACCAAGAAACAATACAGACTTACTGCGTAGAAGACACCCCAATAT	chr18	34313639	34313854		2
Inflammation_1	APC	TXA0490819	APC_t16_53	TCCTCGACTTCATCTGGAGCTAA	TCTGTCTTCATTGTTAGGTAGCTTT	240	38	TCCTCGACTTCATCTGGAGCTAACAAAAATCAAGTAGACACTAAGAAAAAGAAGCCTACTTCACCAGTAAAGCCCATGCCACAAAATACTGAATATAGAACGCGTGTGAGAAAGAATACAGACTCAAAAGTTAATGTAAATACTGAAGAAACTTTCTCAGACAACAAAGACTCAAAGAAACCAAGCTTACAAACCAATGCCAAGGCCTTCAATGAAAAGCTACCTAACAATGAAGACAGA	chr18	34315306	34315545		6
Inflammation_1	chr18	TXA0490818	APC_t16_45	ATCACGCAAAGCCAAAAAACTA	GGGACTCTATTGTCAGATCACTT	233	47	ATCACGCAAAGCCAAAAAACTAGCCCAGACTGCTTCAAAATTACCTCCACCTGTGGCAAGGAAACCAAGTCAGCTACCTGTGTATAAACTTCTGCCAGCACAGAATAGGCTGCAGGCACAAAAACATGTTAGCTTTACACCAGGGGATGATGTGCCCCGGGTGTACTGTGTAGAAGGGACACCTATAAACTTTTCCACAGCAACGTCTCTAAGTGATCTGACAATAGAGTCCC	chr18	34314807	34315039		3
Inflammation_1	chr18	TXA0490817	APC_t16_37	GTGACCTTCCAGATAGTCCTG	TACTTTCTGTGGCGAAGTGTAA	225	54	GTGACCTTCCAGATAGTCCTGGGCAGACCATGCCACCAAGCAGAAGCAAAACCCCTCCACCTCCTCCACAGACAGTGCAGGCCAAGAGAGAGGTGCCAAAAAGTAAAGTCCCTGCTGCTGAGAAGAGAGAGAGTGGGCCTAAGCAGACTGCTGTAAATGCTGCCGTGCAGAGGGTGCAGGTCCTTCCAGACGTGGATACTTTGTTACACTTCGCCACAGAAAGTA	chr18	34314311	34314535		7
Inflammation_1	APC	TXA0490816	APC_t16_94	GCTGAATCCAAGCCTCTGATCTAT	CTGCCACTGCCCACACTC	218	50	GCTGAATCCAAGCCTCTGATCTATCAGATGGCACCTCCTGTCTCTAAAACAGAGGATGTTTGGGTGAGAATTGAGGACTGCCCCATTAACAACCCTAGATCTGGACGGTCCCCCACAGGCAACACCCCCCCAGTGATTGACAGTGTTTCAGAGAAGGGAAGTTCAAGCATTAAAGATTCAAAAGACACCCATGGGAAACAGAGTGTGGGCAGTGGCAG	chr18	34317964	34318181		1
Inflammation_1	APC	TXA0490815	APC_t16_96	ACAGTGTTTCAGAGAAGGGAAGT	GAAAGGGGTACGCTCTGCTATAC	233	50	ACAGTGTTTCAGAGAAGGGAAGTTCAAGCATTAAAGATTCAAAAGACACCCATGGGAAACAGAGTGTGGGCAGTGGCAGTCCTGTGCAAACCGTGGGTCTGGAAACCCGCCTCAACTCCTTTGTTCAGGTAGAGGCCCCAGAACAGAAAGGAACTGAGGCAAAACCAGGACAGAGTAACCCAGTCTCTATAGCAGAGACTGCTGAGACGTGTATAGCAGAGCGTACCCCTTTC	chr18	34318103	34318335		7
Inflammation_1	chr18	TXA0490814	APC_t16_101	CTAGCCCTAGGAAGAGCA	CAGTAGTGATTAACACCAGCTTT	217	52	CTAGCCCTAGGAAGAGCAGCGCAGACAGCACTTCAGCCCGGCCGTCTCAGATCCCTACGCCAGTGAGCACCAACACGAAGAAGAGAGATTCGAAGACTGACAGCACAGAATCCAGTGGAGCCCAAAGTCCTAAACGCCATTCCGGGTCTTACCTCGTGACGTCTGTTTAAAAGAGCTAGAAGGACAAACGTAGAAAAGCTGGTGTTAATCACTACTG	chr18	34318412	34318628		4
Inflammation_1	APC	TXA0490813	APC_t16_22	CCATATAGGTCAAGGGGAACCAG	TGATCCACATGATGTTTCTCTTCATT	227	37	CCATATAGGTCAAGGGGAACCAGTGGTTCAGAAACAAATCGAATGGGTTCTAGTCATGCAATTAATCAAAATGTAAACCAGTCTCTGTGTCAGGAAGATGATTATGAAGATGATAAACCTACCAACTACAGTGAACGTTATTCTGAGGAAGAACAACATGAAGAAGAAGAAGAGAGACCGACAAATTATAGCATAAAATATAATGAAGAGAAACATCATGTGGATCA	chr18	34313347	34313573		8
Inflammation_1	APC	TXA0490812	APC_t16_6	GGAATCTCATGGCAAACAGACCT	GTCGATTGGCGTCAAAAGCATAG	237	46	GGAATCTCATGGCAAACAGACCTGCAAAGTATAAGGATGCCAATATCATGTCTCCCGGCTCAAGTCTGCCATCCCTTCACGTTAGGAAACAGAAAGCTCTAGAAGCTGAGCTAGATGCTCAGCATTTATCAGAAACCTTCGACAACATTGACAACCTAAGTCCCAAGGCCTCTCACCGGAGTAAGCAGAGACACAAGCAGAATCTTTATGGTGACTATGCTTTTGACGCCAATCGAC	chr18	34312226	34312462		1
Inflammation_1	APC	TXA0490811	APC_t16_35	GCTCGTATTCAGCAGGTGTACTT	GCAGCAGGGACTTTACTTTTTGG	237	54	GCTCGTATTCAGCAGGTGTACTTCTGTCAGCTCCCTTGACAGTTTTGAGAGTCGCTCCATTGCCAGCTCTGTTCAGAGTGAGCCATGTAGTGGAATGGTGAGTGGCATCATAAGCCCCAGTGACCTTCCAGATAGTCCTGGGCAGACCATGCCACCAAGCAGAAGCAAAACCCCTCCACCTCCTCCACAGACAGTGCAGGCCAAGAGAGAGGTGCCAAAAAGTAAAGTCCCTGCTGC	chr18	34314192	34314428		2
Inflammation_1	APC	TXA0490810	APC_t16_20	AGATGAAATAAAGCAAAACGAGCAA	TCTTCCTGACACAGAGACTGGTT	228	40	AGATGAAATAAAGCAAAACGAGCAAAGACAAGCAAGAAGCCAGAACACCAGTTATCCTGTCTATTCTGAGAATACCGATGACAAACACCTCAAATTCCAACCACATTTTGGACAACAAGAATGTGTTTCCCCATATAGGTCAAGGGGAACCAGTGGTTCAGAAACAAATCGAATGGGTTCTAGTCATGCAATTAATCAAAATGTAAACCAGTCTCTGTGTCAGGAAGA	chr18	34313217	34313444		2
Inflammation_1	APC	TXA0490809	APC_t16_83	ATCAGATGAGTAACGGCAATGGG	CCTGGTGGGAGAATCTGGTCT	224	44	ATCAGATGAGTAACGGCAATGGGTCAAATAAAAAGGTAGAACTTTCTAGAATGTCTTCAACTAAATCAAGTGGAAGTGAATCAGACAGATCAGAAAGGCCTGCATTAGTACGCCAGTCTACTTTCATCAAAGAAGCCCCAAGCCCAACCCTGAGGAGGAAACTGGAGGAATCTGCCTCATTTGAATCCCTTTCTCCATCTTCTAGACCAGATTCTCCCACCAGG	chr18	34317257	34317480		7
Inflammation_1	chr18	TXA0490808	APC_t16_57	GCATCACTACACCCCTATTGAG	GCTCTGTTTGCTGGATGTTTTAT	234	49	GCATCACTACACCCCTATTGAGGGGACGCCGTACTGCTTTTCCCGAAATGACTCCTTGAGTTCTCTGGATTTTGATGATGACGATGTTGACCTTTCCAGGGAAAAGGCCGAGTTAAGAAAGGGCAAAGAAAGCAAGGATTCCGAAGCCAAAGTTACCTGCCGCCCAGAACCAAACTCAAGCCAGCAGGCAGCTAGTAAGTCACAAGCCAGTATAAAACATCCAGCAAACAGAGC	chr18	34315575	34315808		1
Inflammation_1	APC	TXA0490807	APC_t16_33	CCAGGCTTCTGGCTTATCTTCAG	CCACTCACCATTCCACTACATGG	240	50	CCAGGCTTCTGGCTTATCTTCAGAATCAACCAGGCATAATAAAGCTGTTGAGTTTTCTTCAGGAGCCAAGTCTCCCTCCAAAAGTGGTGCTCAGACACCCAAAAGTCCCCCAGAACACTATGTCCAGGAGACTCCGCTCGTATTCAGCAGGTGTACTTCTGTCAGCTCCCTTGACAGTTTTGAGAGTCGCTCCATTGCCAGCTCTGTTCAGAGTGAGCCATGTAGTGGAATGGTGAGTGG	chr18	34314057	34314296		5
Inflammation_1	chr18	TXA0490806	APC_t16_98	CCCAGAACAGAAAGGAACTGA	GCGTAGGGATCTGAGACG	233	54	CCCAGAACAGAAAGGAACTGAGGCAAAACCAGGACAGAGTAACCCAGTCTCTATAGCAGAGACTGCTGAGACGTGTATAGCAGAGCGTACCCCTTTCAGTTCCAGTAGCTCCAGCAAGCACAGCTCACCTAGCGGGACTGTTGCTGCCAGAGTGACACCTTTTAATTACAACCCTAGCCCTAGGAAGAGCAGCGCAGACAGCACTTCAGCCCGGCCGTCTCAGATCCCTACGC	chr18	34318239	34318471		3
Inflammation_1	chr18	TXA0490805	APC_t16_16	TAGGACATGCTCTATGCCTTATG	GGTGTATCCAGTTCTCCATCATT	240	38	TAGGACATGCTCTATGCCTTATGCCAAAGTGGAATATAAACGATCTTCAAATGACAGTTTAAATAGTGTCACTAGTAGTGATGGATATGGTAAAAGAGGCCAAATGAAACCCTCAGTTGAATCCTATTCTGAAGATGATGAAAGTAAATTTTGCAGTTATGGTCAGTATCCAGCTGACCTAGCCCATAAGATACACAGTGCAAATCATATGGATGATAATGATGGAGAACTGGATACACC	chr18	34312878	34313117		5
Inflammation_1	APC	TXA0490804	APC_t16_24	TGAGGAAGAACAACATGAAGAAGAA	TTGGCATTAGATGGAGGTACAGC	237	36	TGAGGAAGAACAACATGAAGAAGAAGAAGAGAGACCGACAAATTATAGCATAAAATATAATGAAGAGAAACATCATGTGGATCAGCCTATTGATTATAGTTTAAAATATGCCACTGACATTTCTTCCTCACAAAAACCATCATTTTCATTCTCAAAGAATTCATCAGCACAAAGCACTAAACCTGAACATCTCTCTCCAAGCAGCGAGAATACAGCTGTACCTCCATCTAATGCCAA	chr18	34313490	34313726		1
Inflammation_1	APC	TXA0490803	APC_t16_2	TGTCACTAATCACATTTTCCCCTT	TGTGCTTGGAATGAATGAGGTTC	240	40	TGTCACTAATCACATTTTCCCCTTAATCTCATGTGTTTTTGTTTTAATTCAGGCAAATCCTAAGAGAGAACAATTGCCTACAAACTTTATTACAGCACTTGAAATCTCACAGCTTGACAATAGTCAGTAATGCATGTGGAACTTTGTGGAATCTCTCAGCAAGAAATCCTAAAGACCAGGAAGCCTTGTGGGACATGGGGGCAGTGAGCATGCTCAAGAACCTCATTCATTCCAAGCACA	chr18	34311953	34312192		5
Inflammation_1	APC	TXA0490802	APC_t16_66	TTGACTCTGAGGACGACCTGTTA	GGAGTTTGCGCCTTCCTGAATA	236	46	TTGACTCTGAGGACGACCTGTTACAGGAGTGTATAAGTTCTGCCATGCCAAAAAAGAAAAGGCCTTCAAGACTCAAGAGTGAGAGCGAAAAGCAGAGCCCTAGAAAAGTGGGTGGCATATTAGCTGAAGACCTGACGCTTGATTTGAAAGATCTACAGAGGCCAGATTCAGAACACGCTTTCTCCCCCGACTCAGAAAATTTTGACTGGAAAGCTATTCAGGAAGGCGCAAACTCC	chr18	34316144	34316379		6
Inflammation_1	APC	TXA0490801	APC_t16_29	AAAGGCACTACTTGCAAAGTCCC	GGAACTTCAGTTGCAGGATCTTC	239	43	AAAGGCACTACTTGCAAAGTCCCCTCCATCAACCAAGAAACAATACAGACTTACTGCGTAGAAGACACCCCAATATGTTTTTCAAGGTGCAGTTCATTATCATCACTGTCATCAGCTGACGATGAAATAGGATGTGATCAGACAACACAGGAAGCAGATTCTGCTAATACTCTGCAGACAGCAGAAGTAAAAGAGAATGATGTAACTCGGTCAGCTGAAGATCCTGCAACTGAAGTTCC	chr18	34313779	34314017		4
Inflammation_1	APC	TXA0490800	APC_t16_72	TCAAACCTGGAGAGAAAAGCACA	GAGACAGGGCTTGTACTAGAGGA	238	42	TCAAACCTGGAGAGAAAAGCACATTAGAAGCAAAAAAAATAGAATCTGAAAACAAAGGAATCAAAGGCGGGAAAAAGGTTTATAAAAGCTTGATTACGGGAAAGATTCGCTCCAATTCAGAAATTTCCAGCCAAATGAAACAACCCCTCCCGACAAACATGCCTTCAATCTCAAGAGGCAGGACGATGATTCACATCCCAGGGCTTCGGAATAGCTCCTCTAGTACAAGCCCTGTCTC	chr18	34316555	34316792		1
Inflammation_1	APC	TXA0490799	APC_t16_92	GCACCCAGACAGATGAAGGAAAA	ACCGTCCAGATCTAGGGTTGTTA	232	51	GCACCCAGACAGATGAAGGAAAACCAGGTGCCCACCAAAGGAACATGGAGGAAAATCAAGGAAAGTGACATTTCTCCCACAGGCATGGCTTCTCAGAGCGCTTCCTCAGGTGCTGCCAGTGGTGCTGAATCCAAGCCTCTGATCTATCAGATGGCACCTCCTGTCTCTAAAACAGAGGATGTTTGGGTGAGAATTGAGGACTGCCCCATTAACAACCCTAGATCTGGACGGT	chr18	34317841	34318072		8
Inflammation_1	chr18	TXA0490798	APC_t2_1	CATGTGTTGCAAAGGTTATTTGGC	TGGACACTGAGCTTCACACAGTA	187	40	CATGTGTTGCAAAGGTTATTTGGCATTTCATGCTGATGCACTGTGCTCTCTCAATAGGAAGTACTTAAGCAGCTACAGGGAAGTATTGAAGATGAGACTATGACTTCTGGACAGATTGACTTACTAGAGCGTCTTAAAGGTACGTTTTTAAAAGCACTTTAAAATACTGTGTGAAGCTCAGTGTCCA	chr18	34268241	34268427		3
Inflammation_1	APC	TXA0490797	APC_t2_2	ATGCACTGTGCTCTCTCAATAGG	TGTATTCAACAGCTACAACCCAG	231	45	ATGCACTGTGCTCTCTCAATAGGAAGTACTTAAGCAGCTACAGGGAAGTATTGAAGATGAGACTATGACTTCTGGACAGATTGACTTACTAGAGCGTCTTAAAGGTACGTTTTTAAAAGCACTTTAAAATACTGTGTGAAGCTCAGTGTCCAGGTCAGCTGCTCTCACTGGATGCTGGGCTCAGCTTGCTCTTCTTCCCCACCTCCCCCTGGGTTGTAGCTGTTGAATACA	chr18	34268276	34268506		1
Inflammation_1	chr3	TXA0490796	FBXW7_t12_5	GAGCGGGGGAGTTGTG	GGGAAGGGTAGGGAGTATATTGT	182	51	GAGCGGGGGAGTTGTGTGGCGGATCAGGGCCTCAAACACAAAGCTGGTGTGTGCAGTCGGGAGTCGGAATGGAACTGAGGAAACCAAGCTCCTGGTGCTGGACTTTGATGTGGACATGAAATGAAAAGCAGACATGATGAATTTTGTCCAACTGTGTAGACAATATACTCCCTACCCTTCCC	chr3	84977418	84977599		1
Inflammation_1	chr18	TXA0490445	APC_t15_4	AAGCGTTTTGAGTGCCTTATGGA	GCTATCAAGCTGGACACATTCCG	183	48	AAGCGTTTTGAGTGCCTTATGGAACCTGTCTGCACACTGCACTGAGAATAAGGCTGACATCTGTGCTGTGGATGGAGCACTGGCATTTCTGGTTGGCACCCTCACTTACCGGAGCCAGACAAATACTTTAGCCATTATTGAAAGTGGAGGTGGGATATTACGGAATGTGTCCAGCTTGATAGC	chr18	34310707	34310889		8
Inflammation_1	chr18	TXA0490435	APC_t13_2	CAGGCAGATTCCTTGATGACT	GCCACTAAATACTAAACCAAAGC	190	40	CAGGCAGATTCCTTGATGACTCTACTCCGCTTCTACTGTTACAGGCTACGCTGTGTTCTATGAAAGGCTGCATGAGAGCACTTGTGGCCCAGTTAAAATCTGAGAGTGAAGACTTACAGCAGGTACTACTTAGAATTTTAGCAAGTTAATGTACTAATTTATATTAAGCTTTGGTTTAGTATTTAGTGGC	chr18	34305522	34305711		3
Inflammation_1	chr18	TXA0490434	APC_t11_1	TGTTCATATGTTCCAATGGACTG	CCAGAGGCCCCATCCT	180	46	TGTTCATATGTTCCAATGGACTGTAGACTAGGACTGACACATTAATTATCTGAATTTGAGAATAAAACTTAGACTCAGTATTTGTTCCTCTTCTTCTTCAGGTAGGAAGGCTACCCGGGGCATTTCATCCCAGGAGCTAGGTCAGGGGCTTTCAGGTGAGGAGCAGGATGGGGCCTCTGG	chr18	34301161	34301340		7
Inflammation_1	chr18	TXA0490433	APC_t9_4	CTCTCCTCATCCAGCTTTTACAT	AGTAAGCTCGTATCTGTTCCAAA	189	50	CTCTCCTCATCCAGCTTTTACATGGCAATGACAAAGACTCTGTATTGTTGGGAAATTCCCGGGGCAGTAAAGAGGCTCGGGCCAGGGCCAGTGCAGCACTCCACAACATCATTCACTCACAGCCTGATGACAAGAGAGGCAGGCGTGAAATCCGAGTCCTTCATCTTTTGGAACAGATACGAGCTTACT	chr18	34298550	34298738		7
Inflammation_1	chr18	TXA0490432	APC_t9_2	GTGGAAATGGTGTATTCCTTGTT	GGAATTTCCCAACAATACAGAGT	186	45	GTGGAAATGGTGTATTCCTTGTTGTCAATGCTTGGTACTCATGATAAGGACGATATGTCACGAACTTTGCTAGCTATGTCCAGCTCCCAAGACAGCTGTATATCCATGCGGCAGTCTGGATGTCTTCCTCTCCTCATCCAGCTTTTACATGGCAATGACAAAGACTCTGTATTGTTGGGAAATTCC	chr18	34298423	34298608		6
Inflammation_1	chr18	TXA0490431	APC_t9_5	TGCAGCACTCCACAACATCA	CATTGAGATGCACACTATAAAGAACA	190	48	TGCAGCACTCCACAACATCATTCACTCACAGCCTGATGACAAGAGAGGCAGGCGTGAAATCCGAGTCCTTCATCTTTTGGAACAGATACGAGCTTACTGTGAAACCTGTTGGGAGTGGCAGGAAGCCCACGAACAAGGCATGGACCAGGACAAAAACCCAAGTATGTTCTTTATAGTGTGCATCTCAATG	chr18	34298641	34298830		4
Inflammation_1	chr18	TXA0490429	APC_t9_1	TCCCATTCATCACTTCATTAGAT	CATTGCCATGTAAAAGCTGGAT	234	41	TCCCATTCATCACTTCATTAGATCTAGTTTTGGGTATTAAAGTTATAATTTTGTTTCTAAACTCATTTGGCCCACAGGTGGAAATGGTGTATTCCTTGTTGTCAATGCTTGGTACTCATGATAAGGACGATATGTCACGAACTTTGCTAGCTATGTCCAGCTCCCAAGACAGCTGTATATCCATGCGGCAGTCTGGATGTCTTCCTCTCCTCATCCAGCTTTTACATGGCAATG	chr18	34298346	34298579	Assays designed by relax mode and have no off-target hits	1
Inflammation_1	APC	TXA0490428	APC_t9_3	CTAGCTATGTCCAGCTCCCAAG	TCCAAAAGATGAAGGACTCGGAT	230	51	CTAGCTATGTCCAGCTCCCAAGACAGCTGTATATCCATGCGGCAGTCTGGATGTCTTCCTCTCCTCATCCAGCTTTTACATGGCAATGACAAAGACTCTGTATTGTTGGGAAATTCCCGGGGCAGTAAAGAGGCTCGGGCCAGGGCCAGTGCAGCACTCCACAACATCATTCACTCACAGCCTGATGACAAGAGAGGCAGGCGTGAAATCCGAGTCCTTCATCTTTTGGA	chr18	34298492	34298721		3
Inflammation_1	chr18	TXA0490427	APC_t8_2	AGCTTCAGAGTGGCCTAT	AGACCATCTTAGCAAAATACCC	220	45	AGCTTCAGAGTGGCCTATATTTATAATCTAAATTGCACTGCCTATAATTTGCTTAACTTCTAGAGTCCAGCTACACGTGTGGATCACGAAACAGCCAGTGTTTTGAGTTCTAGCGGCACGCACTCTGCTCCTCGAAGGTTGACAAGTCATCTGGGGACAAAGGTAACAGCAGATTACAAACCCTCTTGCTAGTGCTAGGGGTATTTTGCTAAGATGGTCT	chr18	34295968	34296187		5
Inflammation_1	chr18	TXA0490426	APC_t4_2	TGAGAGCTACCAGGCAATATGTA	AGTACTCAAAGGTCAAGTTACCAA	220	36	TGAGAGCTACCAGGCAATATGTATTAGCTTGTGTAAATTTACCTTTCTTCTAAACAGATCATTACTCCTTGCTGATCTTGACAAAGAAGAGAAGGAAAAGGACTGGTATTATGCTCAACTTCAGAACCTCACAAAAAGAATAGATAGCCTGCCTTTAACTGAAAATGTAAGTAACTTGACAGTGCAGCTTTTAGATTTGGTAACTTGACCTTTGAGTACT	chr18	34272382	34272601	Assays designed by relax mode and have no off-target hits	5
Inflammation_1	APC	TXA0490425	APC_t4_1	TTCATTATTGTCTTCCAGCAGCA	TCTAAAAGCTGCACTGTCAAGTTA	223	38	TTCATTATTGTCTTCCAGCAGCAGCTGCTGAGAGCTACCAGGCAATATGTATTAGCTTGTGTAAATTTACCTTTCTTCTAAACAGATCATTACTCCTTGCTGATCTTGACAAAGAAGAGAAGGAAAAGGACTGGTATTATGCTCAACTTCAGAACCTCACAAAAAGAATAGATAGCCTGCCTTTAACTGAAAATGTAAGTAACTTGACAGTGCAGCTTTTAGA	chr18	34272354	34272576		2
Inflammation_1	chr18	TXA0490424	APC_t3_2	TGAAACTACGCTCAAAAATGTCCC	cactcccctgTTACCTTTCTTTT	183	48	TGAAACTACGCTCAAAAATGTCCCTTCGCTCCTACGGAAGTCGGGAAGGATCTGTATCCAGCCGTTCAGGAGAATGCAGTCCTGTCCCCATGGGGTCATTCCCAAGAAGAACATTTGTAAATGGAAGCAGAGAGAGTACTGGGTATCTAGAAGAGCTTGAAAAAGAAAGGTAAcaggggagtg	chr18	34269086	34269268	One primer sits in the repeat region	7
Inflammation_1	chr18	TXA0490423	APC_t3_3	CAGGAGAATGCAGTCCTGTC	GGAACACATGTTACCTTTTTCTT	223	41	CAGGAGAATGCAGTCCTGTCCCCATGGGGTCATTCCCAAGAAGAACATTTGTAAATGGAAGCAGAGAGAGTACTGGGTATCTAGAAGAGCTTGAAAAAGAAAGGTAAcaggggagtgggggtgggtgggtatgggggacttttggtatagcattggaaatgtaaatgacctaaatacctaataaaaaatggaaaaaaaaaAAGAAAAAGGTAACATGTGTTCC	chr18	34269152	34269374		2
Inflammation_1	chr18	TXA0490422	APC_t3_1	ATTTTACATGGCATAAAGCAGTT	CAGTACTCTCTCTGCTTCCATTT	221	43	ATTTTACATGGCATAAAGCAGTTACTACATAAGAACTTGTTTCTGTTTAGAATTTAACTTAGATAGTAATTTCCCCGGAGTGAAACTACGCTCAAAAATGTCCCTTCGCTCCTACGGAAGTCGGGAAGGATCTGTATCCAGCCGTTCAGGAGAATGCAGTCCTGTCCCCATGGGGTCATTCCCAAGAAGAACATTTGTAAATGGAAGCAGAGAGAGTACTG	chr18	34269006	34269226		5
Inflammation_1	chr18	TXA0490382	SMAD4_t4_2	TCCAAGTGGCTACACATAAATACT	GCCAAGTAATCGCGCATC	182	53	TCCAAGTGGCTACACATAAATACTTGATGGTGAGGAAAACTTTCGACTCGATCTGACTGCAACACTCACTTGTGGAAGCCACAGGAATGTTGGGGAAGTTGGTGGTGCTGGTGGCGTTAGACTCTGCCGGGGCTAACAGAGCCGGGGCGCTGTACGTCTCCGTTGATGCGCGATTACTTGGC	chr18	73662589	73662770		4
Inflammation_1	chr18	TXA0490381	SMAD4_t5_2	GGCTGCCTATTTTTTCTCAACTA	AATCGCATCTATCCATGTGC	220	45	GGCTGCCTATTTTTTCTCAACTATTTAAAAGGTTTTAAAAAGCATGTACATACTATGATGGTAAGTAGCTGGCTGAGCAGTAAATCCATTCTGCTGCTGTCCTGGCTGAGGCCCTGAAGCTATCTGCAACAGTCCTTCACTATGGCTGCCCGCCAGAATACTGGCCGGCTGACCTAGAGAAACAAGAAGACATTAACATGGCACATGGATAGATGCGATT	chr18	73658726	73658945		7
Inflammation_1	chr3	TXA0490196	FBXW7_t8_2	AGCCATCTCTACAGTATGTCACT	TGACCGCTGACCAAACTTTTA	186	41	agcCATCTCTACAGTATGTCACTGTATTCTGAAGAATGTGATATAGTAACATCCATGTGATCTGTACACTTTTCTTATAGGTGCTGAAAGGGCATGATGACCATGTGATCACATGCCTACAGTTTTGTGGCAACCGCATAGTTAGTGGTTCTGATGACAACACTTTAAAAGTTTGGTCAGCGGTCA	chr3	84970716	84970901	One primer sits in the repeat region	1
Inflammation_1	chr4	TXA0490161	ARID1A_t3_4	GCTGGGAGAGCGACGA	CAGCAACCACAGCTTCAGT	208	61	GCTGGGAGAGCGACGAGGATGCTGGCTGCTGAGGTTGCTGCTGCTGGTAGGGAGACTGTGCCTGTGGTTGTGAGTAGGGGGGCTGGCTCTGGGGATGCTGTTGTGTGGTGGACTGCTGGGAGGGATATGGAGTTGGGGACTGCTGATGTGGAGGCTGGGATGGCTGCTGGGAATATGGAGGCTGAGAGGACTGAAGCTGTGGTTGCTG	chr4	133720627	133720834		1
Inflammation_1	chr4	TXA0490160	ARID1A_t5_4	GTGAGGAGAAAAGGGAGACTG	TGATTATTTTGCTTCCTTTCACT	179	50	GTGAGGAGAAAAGGGAGACTGAGCTGGATTGCTCTGCTCTCCTTGGCTGCTGGAAATCCCTGATGTGCTCACGCCAGGACTCAGAGCTCCTTCTGTCCCCATGGGGAGATCATCGATTGAACCAGACAGATCCTGAAACACACACGCAAGGATATTAGTGAAAGGAAGCAAAATAATCA	chr4	133696025	133696203		6
Inflammation_1	chr11	TXA0490108	TRP53_t5_2	CGCCTGTGGGGTTAGG	AACTGTCTCTAAGACGCACAAA	217	53	CGCCTGTGGGGTTAGGACTGGCAGCCTCCCATCTCCCGGCTTCTGACTTATTCTTGCTCTTAGGCCTGGCTCCTCCCCAGCATCTTATCCGGGTGGAAGGAAATTTGTATCCCGAGTATCTGGAAGACAGGCAGACTTTTCGCCACAGCGTGGTGGTACCTTATGAGCCACCCGAGGTCTGTAATTTTGTTTTGGTttgtgcgtcttagagacagtt	chr11	69588563	69588779	One primer sits in the repeat region	6
Inflammation_1	chr6	TXA0490069	KRAS_t1_1	GGACATCACATATAACTGAAATAACT	ACTGAGTATAAACTTGTGGTGGT	232	41	GGACATCACATATAACTGAAATAACTTTCaatataattttctaataaatataaaaatGATATCTTTTTCAAAGCGGCTGGCTGCCGTCCTTTACAAGCGCACGCAGACTGTAGAGCAGCGTTACCTCTATCGTAGGGTCATACTCATCCACAAAGTGATTCTGAATTAGCTGTATCGTCAAGGCGCTCTTGCCTACGCCACCAGCTCCAACCACCACAAGTTTATACTCAGT	chr6	145246571	145246802		5
Inflammation_1	chr6	TXA0490068	KRAS_t2_1	TCATGCAGGCATAACAATTAGCA	GATATTCTCGACACAGCAGGTCA	219	37	TCATGCAGGCATAACAATTAGCAAAGAATCAATAAATGTAAGCTATCATTACTTCACATGCCAACTTTCTTATTCAACTTAAACCCACCTATAATGGTGAATATCTTCAAATGATTTAGTATTATTTATGGCAAATACACAAAGAAAGCCCTCCCCAGTTCTCATGTACTGGTCCCTCATTGCACTGTACTCCTCTTGACCTGCTGTGTCGAGAATATC	chr6	145234160	145234378		3
Inflammation_1	chr6	TXA0490067	KRAS_t2_3	GGCAAATACACAAAGAAAGCCCTC	gttgagctgtTTACATCACCTTG	207	44	GGCAAATACACAAAGAAAGCCCTCCCCAGTTCTCATGTACTGGTCCCTCATTGCACTGTACTCCTCTTGACCTGCTGTGTCGAGAATATCCAAGAGACAGGTTTCTCCATCAATTACTACTTGTTTCCTGTAGGAGTCCTGAGAAGGGAGAAACACAGTCTGGATTATTACAGTGCATCTTTTACAAGGTGATGTAAacagctcaac	chr6	145234289	145234495	One primer sits in the repeat region	6
Inflammation_1	chr9	TXA0490017	CTNNB1_t10_2	TCAGAGAGTGCCAGCTT	TCTCCAATCCTCTCAATGTCTA	220	52	TCAGAGAGTGCCAGCTTAACTGCTTTTCTCCTCCTAGGAGGGCGTGCGCATGGAGGAGATAGTAGAAGGGTGTACTGGAGCTCTCCACATCCTTGCTCGGGACGTTCACAACCGGATTGTAATCCGAGGACTCAATACCATTCCATTGTTTGTGCAGGTACGTCGGCTTCAGGTGACTGCTCTCCAGACTTGAGTCCCTAGACATTGAGAGGATTGGAGA	chr9	120957070	120957289		8
Inflammation_1	chr9	TXA0490016	CTNNB1_t7_2	GACACCATGAGGGCTAACAG	CCAAGGCAGCAACTTGTGTA	179	50	GACACCATGAGGGCTAACAGGCCTGCCTTTGATGTCTGACTTTGCAGGTGGGATGCAGGCACTGGGGCTTCATCTGACAGACCCAAGTCAGCGACTTGTTCAAAACTGTCTTTGGACTCTCAGAAACCTTTCAGATGCAGCGACTAAGCAGGTATATTGTACACAAGTTGCTGCCTTGG	chr9	120955101	120955279		5
Inflammation_1	chr9	TXA0490015	CTNNB1_t3_4	GCAGTTTGACGCTGCT	TGAGAACTTCCCTCAAAGTAAAC	210	45	GCAGTTTGACGCTGCTCATCCCACTAATGTCCAGCGCTTGGCTGAACCATCACAGATGTTGAAACATGCAGTTGTCAATTTGATTAACTATCAGGATGACGCGGAACTTGCCACACGTGCAATTCCTGAGCTGACAAAACTGCTAAACGATGAGGACCAGGTAAGCAGTGATGTAACTTGCTTTTCAGTTTACTTTGAGGGAAGTTCTCA	chr9	120950988	120951197		4
Inflammation_1	chr9	TXA0490014	CTNNB1_t2_3	TGGCTTCTTCAGGTAGCATTTTCA	CTTGCCACTCAGGGAAGGAG	185	51	TGGCTTCTTCAGGTAGCATTTTCAGTTCACTAACATACTCTGTTTTTACAGCTGACCTGATGGAGTTGGACATGGCCATGGAGCCGGACAGAAAAGCTGCTGTCAGCCACTGGCAGCAGCAGTCTTACTTGGATTCTGGAATCCATTCTGGTGCCACCACCACAGCTCCTTCCCTGAGTGGCAAG	chr9	120950471	120950655		6
Inflammation_1	CTNNB1	TXA0490013	CTNNB1_t2_2	TTGTCGTAGATGGCTTCTTCAGG	TGGGAGGTGTCAACATCTTCTTC	230	51	TTGTCGTAGATGGCTTCTTCAGGTAGCATTTTCAGTTCACTAACATACTCTGTTTTTACAGCTGACCTGATGGAGTTGGACATGGCCATGGAGCCGGACAGAAAAGCTGCTGTCAGCCACTGGCAGCAGCAGTCTTACTTGGATTCTGGAATCCATTCTGGTGCCACCACCACAGCTCCTTCCCTGAGTGGCAAGGGCAACCCTGAGGAAGAAGATGTTGACACCTCCCA	chr9	120950461	120950690		8
Inflammation_1	chr3	TXA0459221	FBXW7_t12_3	GAGCGCTGTGACCTGCTTA	CGACTGCACACACCAGCTTT	188	53	GAGCGCTGTGACCTGCTTACAGTTCAACAAGAACTTCGTAATTACCAGCTCAGACGACGGAACGGTCAAACTCTGGGACTTGAAAACGGGTGAATTTATCCGAAACCTCGTCACATTGGAGAGTGGGGGGAGCGGGGGAGTTGTGTGGCGGATCAGGGCCTCAAACACAAAGCTGGTGTGTGCAGTCG	chr3	84977289	84977476		6
Inflammation_1	chr3	TXA0459220	FBXW7_t12_1	CAGAAGCCCTGAACGTCCT	CCAATGTGACGAGGTTTCGGAT	188	50	CAGAAGCCCTGAACGTCCTTCCTAAGCAGTAACCCGCATTTGCCTTTGCCTAGGTCCCAGCAAGCATCAGAGCGCTGTGACCTGCTTACAGTTCAACAAGAACTTCGTAATTACCAGCTCAGACGACGGAACGGTCAAACTCTGGGACTTGAAAACGGGTGAATTTATCCGAAACCTCGTCACATTGG	chr3	84977220	84977407		5
Inflammation_1	FBXW7	TXA0459218	FBXW7_t12_4	CAAACTCTGGGACTTGAAAACGG	TGTCTACACAGTTGGACAAAATTCA	225	50	CAAACTCTGGGACTTGAAAACGGGTGAATTTATCCGAAACCTCGTCACATTGGAGAGTGGGGGGAGCGGGGGAGTTGTGTGGCGGATCAGGGCCTCAAACACAAAGCTGGTGTGTGCAGTCGGGAGTCGGAATGGAACTGAGGAAACCAAGCTCCTGGTGCTGGACTTTGATGTGGACATGAAATGAAAAGCAGACATGATGAATTTTGTCCAACTGTGTAGACA	chr3	84977355	84977579		7
Inflammation_1	FBXW7	TXA0459217	FBXW7_t12_2	TGAACGTCCTTCCTAAGCAGTAA	CCCTGATCCGCCACACAAC	218	53	TGAACGTCCTTCCTAAGCAGTAACCCGCATTTGCCTTTGCCTAGGTCCCAGCAAGCATCAGAGCGCTGTGACCTGCTTACAGTTCAACAAGAACTTCGTAATTACCAGCTCAGACGACGGAACGGTCAAACTCTGGGACTTGAAAACGGGTGAATTTATCCGAAACCTCGTCACATTGGAGAGTGGGGGGAGCGGGGGAGTTGTGTGGCGGATCAGGG	chr3	84977229	84977446		4
Inflammation_1	chr3	TXA0459216	FBXW7_t10_4	TGTTTACACGTCCTGATGGGTC	CTTATGAGTCAACGGCAGAGAA	220	49	TGTTTACACGTCCTGATGGGTCACGTAGCAGCGGTCCGCTGCGTTCAGTATGATGGCAGGAGGGTTGTTAGTGGAGCTTATGATTTTATGGTGAAGGTGTGGGATCCAGAGACTGAGACCTGTCTACACACGTTACAGGGACACACTAATAGAGTCTATTCATTACAGGTAAGAGGCCGTGTCTCTCCCACCCTTTGATTCTCTGCCGTTGACTCATAAG	chr3	84974461	84974680		6
Inflammation_1	chr3	TXA0459215	FBXW7_t10_2	TGTCCTGTGCATTCATTTCCTGA	TAAGCTCCACTAACAACCCTCCT	187	52	TGTCCTGTGCATTCATTTCCTGACTCTTGTGTTCTGTTCTGCTCTGCAGGGTTGTAAGCGGTTCTCGAGATGCCACTCTCAGGGTTTGGGATATTGAGACCGGCCAGTGTTTACACGTCCTGATGGGTCACGTAGCAGCGGTCCGCTGCGTTCAGTATGATGGCAGGAGGGTTGTTAGTGGAGCTTA	chr3	84974354	84974540		4
Inflammation_1	chr3	TXA0459214	FBXW7_t11_3	CGAGTCTGGGATGTGGAGACA	GGCTAACAGAGGGCCAGGA	190	44	CGAGTCTGGGATGTGGAGACAGGGAATTGTATTCACACGCTAACAGGACACCAGTCATTAACGAGTGGAATGGAACTCAAAGACAATATTCTTGTCTCTGGGAATGCAGATTCTACAGTTAAGATCTGGGATATCAAAACAGGACAGTGTTTACAAACTTTGCAAGGTAAGTCCTGGCCCTCTGTTAGCC	chr3	84976219	84976408		3
Inflammation_1	chr3	TXA0459213	FBXW7_t11_2	CAGGAATCCGTGTTTCTGTTCTA	AGAATCTGCATTCCCAGAGACAA	202	44	CAGGAATCCGTGTTTCTGTTCTAATACTCTGTGTCTGTTGTAGTTTGATGGCATCCATGTGGTGAGTGGATCTCTTGATACATCAATCCGAGTCTGGGATGTGGAGACAGGGAATTGTATTCACACGCTAACAGGACACCAGTCATTAACGAGTGGAATGGAACTCAAAGACAATATTCTTGTCTCTGGGAATGCAGATTCT	chr3	84976131	84976332		8
Inflammation_1	FBXW7	TXA0459212	FBXW7_t11_1	GCTTGTACCCTCTCCCTATTGTG	GTCTTTGAGTTCCATTCCACTCG	218	45	GCTTGTACCCTCTCCCTATTGTGAGTAATGTCAACAGCTGATAGGACAGGAATCCGTGTTTCTGTTCTAATACTCTGTGTCTGTTGTAGTTTGATGGCATCCATGTGGTGAGTGGATCTCTTGATACATCAATCCGAGTCTGGGATGTGGAGACAGGGAATTGTATTCACACGCTAACAGGACACCAGTCATTAACGAGTGGAATGGAACTCAAAGAC	chr3	84976085	84976302		7
Inflammation_1	FBXW7	TXA0459211	FBXW7_t11_4	AGACAGGGAATTGTATTCACACG	TCTGTTCTCCACAGGTTCTCTCT	224	41	AGACAGGGAATTGTATTCACACGCTAACAGGACACCAGTCATTAACGAGTGGAATGGAACTCAAAGACAATATTCTTGTCTCTGGGAATGCAGATTCTACAGTTAAGATCTGGGATATCAAAACAGGACAGTGTTTACAAACTTTGCAAGGTAAGTCCTGGCCCTCTGTTAGCCTATCTTTAAAAACATCATTGCTATTCAAGAGAGAACCTGTGGAGAACAGA	chr3	84976235	84976458		2
Inflammation_1	FBXW7	TXA0459210	FBXW7_t10_1	ATGGTTTACCTGTCCTGTGCATT	GGATCCCACACCTTCACCATAAA	224	51	ATGGTTTACCTGTCCTGTGCATTCATTTCCTGACTCTTGTGTTCTGTTCTGCTCTGCAGGGTTGTAAGCGGTTCTCGAGATGCCACTCTCAGGGTTTGGGATATTGAGACCGGCCAGTGTTTACACGTCCTGATGGGTCACGTAGCAGCGGTCCGCTGCGTTCAGTATGATGGCAGGAGGGTTGTTAGTGGAGCTTATGATTTTATGGTGAAGGTGTGGGATCC	chr3	84974344	84974567		5
Inflammation_1	FBXW7	TXA0459209	FBXW7_t10_3	TATTGAGACCGGCCAGTGTTTAC	AGAGAATCAAAGGGTGGGAGAGA	220	50	TATTGAGACCGGCCAGTGTTTACACGTCCTGATGGGTCACGTAGCAGCGGTCCGCTGCGTTCAGTATGATGGCAGGAGGGTTGTTAGTGGAGCTTATGATTTTATGGTGAAGGTGTGGGATCCAGAGACTGAGACCTGTCTACACACGTTACAGGGACACACTAATAGAGTCTATTCATTACAGGTAAGAGGCCGTGTCTCTCCCACCCTTTGATTCTCT	chr3	84974445	84974664		1
Inflammation_1	chr3	TXA0459208	FBXW7_t9_1	AATGGGATGTTAGTGTAGTCTTTGA	TCCAGTTTCAGCATTCCACA	190	42	AATGGGATGTTAGTGTAGTCTTTGACTTACTTGCATTTCTACCTAAAATTAATCATCTGAAGTGTTTTTCCAGTGTCTGAGAACGTTAGTGGGACATACAGGTGGAGTGTGGTCATCACAGATGAGAGACAATATCATCATCAGTGGATCGACTGACCGGACTCTCAAAGTGTGGAATGCTGAAACTGGA	chr3	84972302	84972491		2
Inflammation_1	chr3	TXA0459207	FBXW7_t9_4	TGGTCATCACAGATGAGAGACAAT	CAGTAATGCGAGCCCCAATCATA	185	43	TGGTCATCACAGATGAGAGACAATATCATCATCAGTGGATCGACTGACCGGACTCTCAAAGTGTGGAATGCTGAAACTGGAGAGTGTATACATACTTTATATGGGCACACTTCTACTGTACGGTGTATGCATCTCCATGAAAAAAGGTAAAGGATGTGCCATTATGATTGGGGCTCGCATTACTG	chr3	84972411	84972595		8
Inflammation_1	FBXW7	TXA0459206	FBXW7_t9_2	AGTGTAGTCTTTGACTTACTTGCAT	CGTACAGTAGAAGTGTGCCCATA	220	41	AGTGTAGTCTTTGACTTACTTGCATTTCTACCTAAAATTAATCATCTGAAGTGTTTTTCCAGTGTCTGAGAACGTTAGTGGGACATACAGGTGGAGTGTGGTCATCACAGATGAGAGACAATATCATCATCAGTGGATCGACTGACCGGACTCTCAAAGTGTGGAATGCTGAAACTGGAGAGTGTATACATACTTTATATGGGCACACTTCTACTGTACG	chr3	84972313	84972532		7
Inflammation_1	FBXW7	TXA0459205	FBXW7_t9_3	CATACAGGTGGAGTGTGGTCATC	TCCCAGAGTCACAAGGAACAGTA	218	44	CATACAGGTGGAGTGTGGTCATCACAGATGAGAGACAATATCATCATCAGTGGATCGACTGACCGGACTCTCAAAGTGTGGAATGCTGAAACTGGAGAGTGTATACATACTTTATATGGGCACACTTCTACTGTACGGTGTATGCATCTCCATGAAAAAAGGTAAAGGATGTGCCATTATGATTGGGGCTCGCATTACTGTTCCTTGTGACTCTGGGA	chr3	84972396	84972613		3
Inflammation_1	chr3	TXA0459204	FBXW7_t8_3	GTTTTGTGGCAACCGCATAGTTA	AAGGGACGTGTTTCTAAAGGAGG	190	43	GTTTTGTGGCAACCGCATAGTTAGTGGTTCTGATGACAACACTTTAAAAGTTTGGTCAGCGGTCACGGGCAAGGTAAGTTCACTCACTTCTTTCTATATGTCAGGGAGTCACCATTTTGTGTGTGTAGTCACAGTAAAGTGGGTGTTTCTTAATAGCAAATATCAGGCCTCCTTTAGAAACACGTCCCTT	chr3	84970837	84971026		6
Inflammation_1	FBXW7	TXA0459202	FBXW7_t8_1	GTCCTGTATATCTGAGCCATCTCTA	CCTGACATATAGAAAGAAGTGAGTGA	240	42	gtcctgtatatctgagcCATCTCTACAGTATGTCACTGTATTCTGAAGAATGTGATATAGTAACATCCATGTGATCTGTACACTTTTCTTATAGGTGCTGAAAGGGCATGATGACCATGTGATCACATGCCTACAGTTTTGTGGCAACCGCATAGTTAGTGGTTCTGATGACAACACTTTAAAAGTTTGGTCAGCGGTCACGGGCAAGGTAAGTTCACTCACTTCTTTCTATATGTCAGG	chr3	84970702	84970941	One primer sits in the repeat region	5
Inflammation_1	chr3	TXA0459201	FBXW7_t7_1	CTGCACAGCCCAGTATCT	TTCTGTGCTGTCTGATATACGC	205	38	CTGCACAGCCCAGTATCTGGGCCAAGCAGAGAAAACAAGAACTTTATAAGATGTGTAATTTTTATTAGTGGTGAAAAGAATTATTCTCTTGAACTCTTTGATACTTTAGGGATTGATGAACCGTTGCACATCAAGAGAAGAAAAATAATAAAACCAGGTTTCATACACAGCCCATGGAAGAGTGCGTATATCAGACAGCACAGAA	chr3	84969056	84969260		3
Inflammation_1	chr3	TXA0459200	FBXW7_t7_4	CCAGGTTTCATACACAGCCCAT	AACACATGAAGAGAGCAGGCATT	160	43	CCAGGTTTCATACACAGCCCATGGAAGAGTGCGTATATCAGACAGCACAGAATTGATACAAACTGGAGACGAGGAGAACTCAAATCTCCTAAGGTAACAGACTCTTGACATACTAACAGAAACCTTTCTTCAGGAACAATGCCTGCTCTCTTCATGTGTT	chr3	84969209	84969368		2
Inflammation_1	FBXW7	TXA0459199	FBXW7_t7_3	GATGAACCGTTGCACATCAAGAG	CTGAGTTACACTGCAGCCAACA	217	42	GATGAACCGTTGCACATCAAGAGAAGAAAAATAATAAAACCAGGTTTCATACACAGCCCATGGAAGAGTGCGTATATCAGACAGCACAGAATTGATACAAACTGGAGACGAGGAGAACTCAAATCTCCTAAGGTAACAGACTCTTGACATACTAACAGAAACCTTTCTTCAGGAACAATGCCTGCTCTCTTCATGTGTTGGCTGCAGTGTAACTCAG	chr3	84969170	84969386		4
Inflammation_1	FBXW7	TXA0459198	FBXW7_t7_2	CTGGGCCAAGCAGAGAAAACAAG	TTGAGTTCTCCTCGTCTCCAGTT	220	37	CTGGGCCAAGCAGAGAAAACAAGAACTTTATAAGATGTGTAATTTTTATTAGTGGTGAAAAGAATTATTCTCTTGAACTCTTTGATACTTTAGGGATTGATGAACCGTTGCACATCAAGAGAAGAAAAATAATAAAACCAGGTTTCATACACAGCCCATGGAAGAGTGCGTATATCAGACAGCACAGAATTGATACAAACTGGAGACGAGGAGAACTCAA	chr3	84969072	84969291		8
Inflammation_1	chr3	TXA0459195	FBXW7_t6_1	TCAGCCTGGGTAGAGTAACCTTT	GGTTATCCTCAGCCAAAATTCTCC	183	42	TCAGCCTGGGTAGAGTAACCTTTTTTTCTGTGATTTTTTTTTTTTTTTTTTGAAGTGTGAGTATGCCTTCCCTATTTCCTTTTCCATAGTTGGCACTCTATGTGCTTTCATTCCTGGAACCCAAAGACCTGCTGCAAGCGGCTCAGACTTGTCGATACTGGAGAATTTTGGCTGAGGATAACC	chr3	84967351	84967533		2
Inflammation_1	chr3	TXA0459194	FBXW7_t6_3	CGGCTCAGACTTGTCGATACT	GAGCCAGCCATCTACTCTCACTC	165	44	CGGCTCAGACTTGTCGATACTGGAGAATTTTGGCTGAGGATAACCTTCTCTGGAGAGAGAAATGTAAAGAAGAGGGTAAGTTCAGAATCACACACAGATGTGTTTCTACTCTGGAAACAAGTTAACAGAATAACTTGGCTGTGAGTGAGAGTAGATGGCTGGCTC	chr3	84967489	84967653		7
Inflammation_1	FBXW7	TXA0459193	FBXW7_t6_2	TTGAAGTGTGAGTATGCCTTCCC	ACTCACAGCCAAGTTATTCTGTT	235	43	TTGAAGTGTGAGTATGCCTTCCCTATTTCCTTTTCCATAGTTGGCACTCTATGTGCTTTCATTCCTGGAACCCAAAGACCTGCTGCAAGCGGCTCAGACTTGTCGATACTGGAGAATTTTGGCTGAGGATAACCTTCTCTGGAGAGAGAAATGTAAAGAAGAGGGTAAGTTCAGAATCACACACAGATGTGTTTCTACTCTGGAAACAAGTTAACAGAATAACTTGGCTGTGAGT	chr3	84967400	84967634		5
Inflammation_1	FBXW7	TXA0459192	FBXW7_t5_2	GCTTGCGGGTCTTTTGTATGAAT	CCCATAACCACTGGACAGCAC	237	50	GCTTGCGGGTCTTTTGTATGAATTTGTAATGTGTCCAATTCCTCTTTGGTAGAGCTGGAGCGGACCAGAGAAGTTGCTGGCTTTAGATGAGCTCATTGACAGCTGTGAACCAACACAAGTGAAGCATATGATGCAAGTGATAGAGCCCCAGTTCCAGCGAGACTTCATCTCCTTGCTTCCTAAAGAGGTAAGGGGCTGTCAACCGCATCCCGCTGGGTGCTGTCCAGTGGTTATGGG	chr3	84965196	84965432		8
Inflammation_1	chr3	TXA0459191	FBXW7_t4_3	TTCAGCAACACCAACAACTTT	AAACGAGCGAAGCATTTCAAC	161	52	TTCAGCAACACCAACAACTTTTGGGGACCTGAGAGCAGCCAATGGGCAAGGGCAGCAGCGGCGGAGGATTACATCTGTCCAACCACCCACAGGCCTTCAAGAGTGGCTGAAAATGTTTCAGGTGACTACGTGAACACACTGTTGAAATGCTTCGCTCGTTT	chr3	84958525	84958685		6
Inflammation_1	chr3	TXA0459190	FBXW7_t4_1	TTTAAATACATCTGGGGCAAGC	GCCCATTGGCTGCTCT	188	35	TTTAAATACATCTGGGGCAAGCTTAAGGTCTTACGTATAAGCAGGAAATCCAAAATTTTTAACTCTGAAATATTGGTAACATTAATACTTTCATACtttttattttattttattttttaGTACCACTGGCCTTGTACCATGTTCAGCAACACCAACAACTTTTGGGGACCTGAGAGCAGCCAATGGGC	chr3	84958384	84958571	Multiple hits	3
Inflammation_1	chr3	TXA0459189	FBXW7_t3_2	AAGTCTGATAATGGACCAAGTAA	TCAAAGAAATGTTTCCAGATGAC	190	36	AAGTCTGATAATGGACCAAGTAATTTTTTTTATTTTATCTGTTTTACTTTATAGATGAAAAGAAAGTTGGACCATGGTTCTGAAGTTCGTTCCTTTTCTTTGGGAAAGAAACCATGCAAAGTCTCAGATTATACCAGGTAACGTTGAATAGAGGGGTAGGCGGGCATGTCATCTGGAAACATTTCTTTGA	chr3	84954821	84955010		2
Inflammation_1	FBXW7	TXA0459188	FBXW7_t4_4	AACAACTTTTGGGGACCTGAGAG	AAATGGTAGAGCATCAGACACAC	225	49	AACAACTTTTGGGGACCTGAGAGCAGCCAATGGGCAAGGGCAGCAGCGGCGGAGGATTACATCTGTCCAACCACCCACAGGCCTTCAAGAGTGGCTGAAAATGTTTCAGGTGACTACGTGAACACACTGTTGAAATGCTTCGCTCGTTTGCTTGGGGTCAGGGTGGGAGTACAGAAGAatttggccattaacaaaaaaagtagtgtgtctgatgctctaccattt	chr3	84958537	84958761	One primer sits in the repeat region	4
Inflammation_1	FBXW7	TXA0459187	FBXW7_t4_2	GGTCTTACGTATAAGCAGGAAATCCA	GAAACATTTTCAGCCACTCTTGA	234	41	GGTCTTACGTATAAGCAGGAAATCCAAAATTTTTAACTCTGAAATATTGGTAACATTAATACTTTCATACtttttattttattttattttttaGTACCACTGGCCTTGTACCATGTTCAGCAACACCAACAACTTTTGGGGACCTGAGAGCAGCCAATGGGCAAGGGCAGCAGCGGCGGAGGATTACATCTGTCCAACCACCCACAGGCCTTCAAGAGTGGCTGAAAATGTTTC	chr3	84958410	84958643		5
Inflammation_1	FBXW7	TXA0459186	FBXW7_t3_1	TAGCATGCAAACTCAAAGTCTGATAA	GCCCGCCTACCCCTCTATTC	180	37	TAGCATGCAAACTCAAAGTCTGATAATGGACCAAGTAATTTTTTTTATTTTATCTGTTTTACTTTATAGATGAAAAGAAAGTTGGACCATGGTTCTGAAGTTCGTTCCTTTTCTTTGGGAAAGAAACCATGCAAAGTCTCAGATTATACCAGGTAACGTTGAATAGAGGGGTAGGCGGGC	chr3	84954806	84954985		3
Inflammation_1	chr3	TXA0459185	FBXW7_t2_1	ACAGGGCATAGTCTCCTCCAAT	AGGCACGCCAGAAAAGGAAG	181	56	ACAGGGCATAGTCTCCTCCAATAATCTTGTGGGTTCTCGCTCATTATTCCCCGAGTTCTCCTCAGTGGAGCTGCATGCGTGTGTGCGTCCCGAGCAGCGTTCTGGTTCTGAGCTGCGTCTGCTGGTGCTGGGGAGTTTTGCTGCCGGTTCCGCTGCCTAATCTTCCTTTTCTGGCGTGCCT	chr3	84952299	84952479		4
Inflammation_1	chr3	TXA0459184	FBXW7_t2_3	TTCTGAGCTGCGTCTGCTG	ATTTTTCCCCTTCAGGGATTCTG	188	53	TTCTGAGCTGCGTCTGCTGGTGCTGGGGAGTTTTGCTGCCGGTTCCGCTGCCTAATCTTCCTTTTCTGGCGTGCCTGAGCATGTCCACGTTAGAATCTGTGACATACCTACCTGAAAAGGGGTTATATTGTCAGAGACTGCCAAGCAGCCGGACACACGGGGGCACAGAATCCCTGAAGGGGAAAAAT	chr3	84952404	84952591		1
Inflammation_1	chr3	TXA0459183	FBXW7_t2_5	ACATACCTACCTGAAAAGGGGTT	ACACACACACAACCACACAG	180	42	ACATACCTACCTGAAAAGGGGTTATATTGTCAGAGACTGCCAAGCAGCCGGACACACGGGGGCACAGAATCCCTGAAGGGGAAAAATACAGAAAATATGGGTTTCTACGGCACATTAAAAATGATTTTTTACAAAGTAAGTAATCTGTTTTCTTCCtgtgctgtgtggttgtgtgtgtgt	chr3	84952505	84952684	One primer sits in the repeat region	5
Inflammation_1	FBXW7	TXA0459182	FBXW7_t2_4	CCGGTTCCGCTGCCTAAT	acacagcacaGGAAGAAAACAGA	229	45	CCGGTTCCGCTGCCTAATCTTCCTTTTCTGGCGTGCCTGAGCATGTCCACGTTAGAATCTGTGACATACCTACCTGAAAAGGGGTTATATTGTCAGAGACTGCCAAGCAGCCGGACACACGGGGGCACAGAATCCCTGAAGGGGAAAAATACAGAAAATATGGGTTTCTACGGCACATTAAAAATGATTTTTTACAAAGTAAGTAATCTGTTTTCTTCCtgtgctgtgt	chr3	84952442	84952670	One primer sits in the repeat region	8
Inflammation_1	FBXW7	TXA0459181	FBXW7_t2_2	AATCTTGTGGGTTCTCGCTCATT	TGGCAGTCTCTGACAATATAACCC	226	54	AATCTTGTGGGTTCTCGCTCATTATTCCCCGAGTTCTCCTCAGTGGAGCTGCATGCGTGTGTGCGTCCCGAGCAGCGTTCTGGTTCTGAGCTGCGTCTGCTGGTGCTGGGGAGTTTTGCTGCCGGTTCCGCTGCCTAATCTTCCTTTTCTGGCGTGCCTGAGCATGTCCACGTTAGAATCTGTGACATACCTACCTGAAAAGGGGTTATATTGTCAGAGACTGCCA	chr3	84952321	84952546		7
Inflammation_1	chr4	TXA0459180	ARID1A_t1_4	CCCCATGGCCCCGAAG	TCCCCAACCACCAGTACAACTC	206	72	CCCCATGGCCCCGAAGCGCTGCTGTGCGAAGGACGAAGACGACGAGGAGGCAGAGGCGCTGGAGGAGGGAGGCGGCTTGGAgccggcggccgccgccgcgccggAGCCCGGAGTGCCACCTCTCGGGGAGCTCAGCGCGTAGGCCTGGGGAGGCGGGGGGTAGGCGCTGCGGTTGGGGTAGTAGGAGTTGTACTGGTGGTTGGGGA	chr4	133752784	133752989		2
Inflammation_1	chr4	TXA0459179	ARID1A_t1_7	GAGCTCAGCGCGTAGG	CAACATGGCGGACAACAAAG	185	70	GAGCTCAGCGCGTAGGCCTGGGGAGGCGGGGGGTAGGCGCTGCGGTTGGGGTAGTAGGAGTTGTACTGGTGGTTGGGGAAGCCGTGGTCGTGCGAGTTCTGCTGGGGCCCGGCGTAGGGCTCCAAGCCCCCGCCGCCGCCGCTCTGCAGCGCTGCCAGGCCAGGGCTTTGTTGTCCGCCATGTTG	chr4	133752911	133753095		6
Inflammation_1	chr3	TXA0459178	FBXW7_t1_9	GGAGAGTGATGATTTTGATCCGT	GAACTAGCGAGGTAGCATACCAG	190	47	GGAGAGTGATGATTTTGATCCGTCTGATGACAGTAGCAGAGAAGATGAACATACGCACAATAGCAATGTCACAAACTGCAGTAGTGTCTCGGACCTGCCCGCTCACCAGCTCTCCTCTCCATTCTATACAAAGACAACAAAAGTGAGTACCTTTAGTCCCCTTCCAGCTGGTATGCTACCTCGCTAGTTC	chr3	84903938	84904127		3
Inflammation_1	chr3	TXA0459177	FBXW7_t1_1	AAAACCTTTGCATCTTCTGATAGTC	CTGTGGATCCTCCTCAACCA	189	50	AAAACCTTTGCATCTTCTGATAGTCTAGCCAAGGTCCAAGAAGTAGCAAGCTGGCTTTTGGAAATGAATCAGGAACTGCTCTCTGTGGGCAGCAAAAGACGACGAACTGGAGGCTCTCTGAGAGGGAATGCTTCCTCAAGCCAGGTTGATGAGGGACAGATGAATCGCGTGGTTGAGGAGGATCCACAG	chr3	84903507	84903695		4
Inflammation_1	chr3	TXA0459176	FBXW7_t1_5	CGGAATGGTGAACTTGTGGGT	ATCATCACTCTCCTGGTCCATCT	219	50	CGGAATGGTGAACTTGTGGGTGCAAACCCTAGGCCTGGAGACCAGAACGATACCCAGCAAGGACAAGTGGAGGAAAATAATAACCGCTTTATTTCAGTAGATGAGGACTCTTCGGGAAATCAGGAAGAGCAAGAGGAAGATGAAGAGCATGCTGGGGAACaggaggaggaagaggaggaagaggaagaggaggaggagATGGACCAGGAGAGTGATGAT	chr3	84903732	84903950	One primer sits in the repeat region	2
Inflammation_1	chr3	TXA0459175	FBXW7_t1_3	TGAGAGGGAATGCTTCCTCAAG	CTTGCTGGGTATCGTTCTGG	168	55	TGAGAGGGAATGCTTCCTCAAGCCAGGTTGATGAGGGACAGATGAATCGCGTGGTTGAGGAGGATCCACAGCAGCAAGCGAGACATCAAGAGGAGGAGCACACTGCGCGGAATGGTGAACTTGTGGGTGCAAACCCTAGGCCTGGAGACCAGAACGATACCCAGCAAG	chr3	84903625	84903792		8
Inflammation_1	chr3	TXA0459174	FBXW7_t1_7	TAGATGAGGACTCTTCGGGAAA	CGTATGTTCATCTTCTCTGCTACT	164	49	TAGATGAGGACTCTTCGGGAAATCAGGAAGAGCAAGAGGAAGATGAAGAGCATGCTGGGGAACaggaggaggaagaggaggaagaggaagaggaggaggagATGGACCAGGAGAGTGATGATTTTGATCCGTCTGATGACAGTAGCAGAGAAGATGAACATACG	chr3	84903829	84903992		1
Inflammation_1	ARID1A	TXA0459173	ARID1A_t1_8	CTGCGGTTGGGGTAGTAGGA	CCTACGGCTTCGGGCAA	220	70	CTGCGGTTGGGGTAGTAGGAGTTGTACTGGTGGTTGGGGAAGCCGTGGTCGTGCGAGTTCTGCTGGGGCCCGGCGTAGGGCTCCAAGCCCCCGCCGCCGCCGCTCTGCAGCGCTGCCAGGCCAGGGCTTTGTTGTCCGCCATGTTGTTGGTGGAAGACGGCGGCCGCCGCGGCGGCGACGGCAGACGGGCTCCGGCCGTAGGCTTGCCCGAAGCCGTAGG	chr4	133752950	133753169		3
Inflammation_1	ARID1A	TXA0459172	ARID1A_t1_6	CTGTGCGAAGGACGAAGACG	GGGCTTGGAGCCCTACG	235	72	CTGTGCGAAGGACGAAGACGACGAGGAGGCAGAGGCGCTGGAGGAGGGAGGCGGCTTGGAgccggcggccgccgccgcgccggAGCCCGGAGTGCCACCTCTCGGGGAGCTCAGCGCGTAGGCCTGGGGAGGCGGGGGGTAGGCGCTGCGGTTGGGGTAGTAGGAGTTGTACTGGTGGTTGGGGAAGCCGTGGTCGTGCGAGTTCTGCTGGGGCCCGGCGTAGGGCTCCAAGCCC	chr4	133752805	133753039		1
Inflammation_1	FBXW7	TXA0459171	FBXW7_t1_4	AGGTTGATGAGGGACAGATGAAT	TCATCTTCCTCTTGCTCTTCCTG	226	50	AGGTTGATGAGGGACAGATGAATCGCGTGGTTGAGGAGGATCCACAGCAGCAAGCGAGACATCAAGAGGAGGAGCACACTGCGCGGAATGGTGAACTTGTGGGTGCAAACCCTAGGCCTGGAGACCAGAACGATACCCAGCAAGGACAAGTGGAGGAAAATAATAACCGCTTTATTTCAGTAGATGAGGACTCTTCGGGAAATCAGGAAGAGCAAGAGGAAGATGA	chr3	84903649	84903874		3
Inflammation_1	FBXW7	TXA0459170	FBXW7_t1_2	TCTGATAGTCTAGCCAAGGTCCA	TGCACCCACAAGTTCACCATTC	234	53	TCTGATAGTCTAGCCAAGGTCCAAGAAGTAGCAAGCTGGCTTTTGGAAATGAATCAGGAACTGCTCTCTGTGGGCAGCAAAAGACGACGAACTGGAGGCTCTCTGAGAGGGAATGCTTCCTCAAGCCAGGTTGATGAGGGACAGATGAATCGCGTGGTTGAGGAGGATCCACAGCAGCAAGCGAGACATCAAGAGGAGGAGCACACTGCGCGGAATGGTGAACTTGTGGGTGCA	chr3	84903522	84903755		5
Inflammation_1	FBXW7	TXA0459169	FBXW7_t1_6	AGCAAGGACAAGTGGAGGAAAAT	TTGTGACATTGCTATTGTGCGTA	225	46	AGCAAGGACAAGTGGAGGAAAATAATAACCGCTTTATTTCAGTAGATGAGGACTCTTCGGGAAATCAGGAAGAGCAAGAGGAAGATGAAGAGCATGCTGGGGAACaggaggaggaagaggaggaagaggaagaggaggaggagATGGACCAGGAGAGTGATGATTTTGATCCGTCTGATGACAGTAGCAGAGAAGATGAACATACGCACAATAGCAATGTCACAA	chr3	84903787	84904011		6
Inflammation_1	FBXW7	TXA0459168	FBXW7_t1_8	CTGGGGAACAGGAGGAGGAA	CAGCTGGAAGGGGACTAAAGGTA	225	50	CTGGGGAACaggaggaggaagaggaggaagaggaagaggaggaggagATGGACCAGGAGAGTGATGATTTTGATCCGTCTGATGACAGTAGCAGAGAAGATGAACATACGCACAATAGCAATGTCACAAACTGCAGTAGTGTCTCGGACCTGCCCGCTCACCAGCTCTCCTCTCCATTCTATACAAAGACAACAAAAGTGAGTACCTTTAGTCCCCTTCCAGCTG	chr3	84903883	84904107	One primer sits in the repeat region	7
Inflammation_1	chr4	TXA0459167	ARID1A_t3_2	GAGTACATGGAGGGCAAGAGG	CAGTCTCCCTACCAGCAGCA	177	60	GAGTACATGGAGGGCAAGAGGCAGACCATCCGTCTGTCTTACCTGTGGTGGAGGGAAGCGCTGCTGGGAATAGGCAGTTTGCTGGGACTGCTGAGGCTGGGGCTGAGGATATGCAGCCTGCTGGGAGAGCGACGAGGATGCTGGCTGCTGAGGTTGCTGCTGCTGGTAGGGAGACTG	chr4	133720508	133720684		2
Inflammation_1	chr4	TXA0459166	ARID1A_t3_7	TGAAGCTGTGGTTGCTGAGT	AGGTGAGTCACTTTAAAAGGATGTT	220	55	TGAAGCTGTGGTTGCTGAGTCTGCGGCTGCTGCTGATACGAAGGCTGGGCATGAGGGGTCTGGGATGGTGGTTGCTGGGCGTAAGGTGGCTGCTGCTGGGGATGAGGACTTTGCTGGTTATAGTATGGAGTCTGGCCCTGCTGGCCATACGCACTGGGGCCTTGCTGGCCATAAGGTGGAATCTGTAAGAAAGAAAACATCCTTTTAAAGTGACTCACCT	chr4	133720818	133721037		7
Inflammation_1	chr4	TXA0459165	ARID1A_t3_6	GACTGCTGGGAGGGATATGGA	CCAGCAGCAGCCACCTTAC	180	61	GACTGCTGGGAGGGATATGGAGTTGGGGACTGCTGATGTGGAGGCTGGGATGGCTGCTGGGAATATGGAGGCTGAGAGGACTGAAGCTGTGGTTGCTGAGTCTGCGGCTGCTGCTGATACGAAGGCTGGGCATGAGGGGTCTGGGATGGTGGTTGCTGGGCGTAAGGTGGCTGCTGCTGG	chr4	133720737	133720916		6
Inflammation_1	chr4	TXA0459163	ARID1A_t2_4	GTACCGCTGTGGAGTCTGG	AGCCTGAGGTTAATGTAAATGTTCT	189	50	GTACCGCTGTGGAGTCTGGGACCCATATGGCTGCCCTGGGTACCCATGTCCTTGTTGCGGTCCTGAAGGAGGTCCCTGTTGTTGCGAGTATGGGTTAGTCCCACCATACGGCTGAGGTCTCATCTTTCCCATCTGATCCATTGGACTGGATGACTATAAAATAAAGAACATTTACATTAACCTCAGGCT	chr4	133722899	133723087		7
Inflammation_1	chr4	TXA0459162	ARID1A_t2_2	CTCAAACACCAATTGTGGACAGC	CTTCAGGACCGCAACAAGGA	180	56	CTCAAACACCAATTGTGGACAGCAAAAAAGCTCAAGGTAATCCATCACCTACCTGCTGTGCATAAGAGAGGCTGCCCATGGCACTCTGAGCCCGGCCCTGCATGGTCATGGGGTACCGCTGTGGAGTCTGGGACCCATATGGCTGCCCTGGGTACCCATGTCCTTGTTGCGGTCCTGAAG	chr4	133722787	133722966		1
Inflammation_1	ARID1A	TXA0459161	ARID1A_t2_3	CCCTGCATGGTCATGGGGTA	GTGTTGGCAAGAGACCATTGAAG	227	51	CCCTGCATGGTCATGGGGTACCGCTGTGGAGTCTGGGACCCATATGGCTGCCCTGGGTACCCATGTCCTTGTTGCGGTCCTGAAGGAGGTCCCTGTTGTTGCGAGTATGGGTTAGTCCCACCATACGGCTGAGGTCTCATCTTTCCCATCTGATCCATTGGACTGGATGACTATAAAATAAAGAACATTTACATTAACCTCAGGCTTCAATGGTCTCTTGCCAACAC	chr4	133722882	133723108		8
Inflammation_1	ARID1A	TXA0459160	ARID1A_t2_1	GCATCAAGAAGCCATTCTGACCT	ACTAACCCATACTCGCAACAACA	239	54	GCATCAAGAAGCCATTCTGACCTTATACCTCAAACACCAATTGTGGACAGCAAAAAAGCTCAAGGTAATCCATCACCTACCTGCTGTGCATAAGAGAGGCTGCCCATGGCACTCTGAGCCCGGCCCTGCATGGTCATGGGGTACCGCTGTGGAGTCTGGGACCCATATGGCTGCCCTGGGTACCCATGTCCTTGTTGCGGTCCTGAAGGAGGTCCCTGTTGTTGCGAGTATGGGTTAGT	chr4	133722759	133722997		4
Inflammation_1	ARID1A	TXA0459159	ARID1A_t3_1	GCAAAGCTCTCAAAACACCAAGC	CTACTCACAACCACAGGCACAG	240	58	GCAAAGCTCTCAAAACACCAAGCTTATGTAAGCTGCCTCTGGCGGAGTACATGGAGGGCAAGAGGCAGACCATCCGTCTGTCTTACCTGTGGTGGAGGGAAGCGCTGCTGGGAATAGGCAGTTTGCTGGGACTGCTGAGGCTGGGGCTGAGGATATGCAGCCTGCTGGGAGAGCGACGAGGATGCTGGCTGCTGAGGTTGCTGCTGCTGGTAGGGAGACTGTGCCTGTGGTTGTGAGTAG	chr4	133720464	133720703		5
Inflammation_1	ARID1A	TXA0459158	ARID1A_t3_8	CTGCTGATACGAAGGCTGGG	AGTCTCTAGATGGGTGGTAGAAGG	240	54	CTGCTGATACGAAGGCTGGGCATGAGGGGTCTGGGATGGTGGTTGCTGGGCGTAAGGTGGCTGCTGCTGGGGATGAGGACTTTGCTGGTTATAGTATGGAGTCTGGCCCTGCTGGCCATACGCACTGGGGCCTTGCTGGCCATAAGGTGGAATCTGTAAGAAAGAAAACATCCTTTTAAAGTGACTCACCTCCATGAAGTTAGGCTCAGGGGCCTTCCTTCTACCACCCATCTAGAGACT	chr4	133720847	133721086		3
Inflammation_1	ARID1A	TXA0459157	ARID1A_t3_3	GCTGCTGGGAATAGGCAGTTT	AGCCATCCCAGCCTCCA	225	61	GCTGCTGGGAATAGGCAGTTTGCTGGGACTGCTGAGGCTGGGGCTGAGGATATGCAGCCTGCTGGGAGAGCGACGAGGATGCTGGCTGCTGAGGTTGCTGCTGCTGGTAGGGAGACTGTGCCTGTGGTTGTGAGTAGGGGGGCTGGCTCTGGGGATGCTGTTGTGTGGTGGACTGCTGGGAGGGATATGGAGTTGGGGACTGCTGATGTGGAGGCTGGGATGGCT	chr4	133720567	133720791		4
Inflammation_1	ARID1A	TXA0459156	ARID1A_t3_5	GGATGCTGTTGTGTGGTGGAC	GGGCCAGACTCCATACTATAACC	237	59	GGATGCTGTTGTGTGGTGGACTGCTGGGAGGGATATGGAGTTGGGGACTGCTGATGTGGAGGCTGGGATGGCTGCTGGGAATATGGAGGCTGAGAGGACTGAAGCTGTGGTTGCTGAGTCTGCGGCTGCTGCTGATACGAAGGCTGGGCATGAGGGGTCTGGGATGGTGGTTGCTGGGCGTAAGGTGGCTGCTGCTGGGGATGAGGACTTTGCTGGTTATAGTATGGAGTCTGGCCC	chr4	133720719	133720955		8
Inflammation_1	chr4	TXA0459155	ARID1A_t4_2	GGTTGCTCTGTATTAGATCACCCT	gcaccaccaTTGGAGCA	216	53	GGTTGCTCTGTATTAGATCACCCTGTACGGGGATTAGAGACACTCACAGGCAAGCTGGAGGGCCTTGACTGAAGACTCAGGTTCATATCTTCTTGCCCTCCCTTACTGGAGGTCATTGAGGGGGCTGAGGATGCCTGAGACCCAAATGAATCTTGAGAAAGCTCCTGCAAGGAAACACAACAAAGCTGTGAGGGCGGGCTGCTCCAAtggtggtgc	chr4	133719490	133719705	One primer sits in the repeat region	8
Inflammation_1	ARID1A	TXA0459154	ARID1A_t4_1	TGCTACCAAGACACCTGGTTTTA	CCTCACAGCTTTGTTGTGTTTCC	220	49	TGCTACCAAGACACCTGGTTTTAAATTGGTTGCTCTGTATTAGATCACCCTGTACGGGGATTAGAGACACTCACAGGCAAGCTGGAGGGCCTTGACTGAAGACTCAGGTTCATATCTTCTTGCCCTCCCTTACTGGAGGTCATTGAGGGGGCTGAGGATGCCTGAGACCCAAATGAATCTTGAGAAAGCTCCTGCAAGGAAACACAACAAAGCTGTGAGG	chr4	133719463	133719682		6
Inflammation_1	chr4	TXA0459153	ARID1A_t5_2	CCAGCCAGCTTTTCCTCTTCC	GCACATCAGGGATTTCCAGCAG	220	61	CCAGCCAGCTTTTCCTCTTCCCAAAAACCAGTACTGAGGGTACCTGGCACTGCAGCAGGCGAGAGTGGTCCTGAGCGAGACTGCGCGACACTGGCAGGAGAGCCAACAGGGGACGGGGACGGGCCTCGGATGCCAGGCAGGTGAGGGGAGGTGTGAGGAGAAAAGGGAGACTGAGCTGGATTGCTCTGCTCTCCTTGGCTGCTGGAAATCCCTGATGTGC	chr4	133695873	133696092		2
Inflammation_1	ARID1A	TXA0459151	ARID1A_t5_1	ATGCTAAGGGAAAAACCATGCAG	CAAGGAGAGCAGAGCAATCCAG	234	59	ATGCTAAGGGAAAAACCATGCAGGCACGAGTCAAAGCCCAGCCAGCTTTTCCTCTTCCCAAAAACCAGTACTGAGGGTACCTGGCACTGCAGCAGGCGAGAGTGGTCCTGAGCGAGACTGCGCGACACTGGCAGGAGAGCCAACAGGGGACGGGGACGGGCCTCGGATGCCAGGCAGGTGAGGGGAGGTGTGAGGAGAAAAGGGAGACTGAGCTGGATTGCTCTGCTCTCCTTG	chr4	133695836	133696069		8
Inflammation_1	ARID1A	TXA0459150	ARID1A_t5_3	CTGGCAGGAGAGCCAACAG	CCTTTCACTAATATCCTTGCGTGTG	227	57	CTGGCAGGAGAGCCAACAGGGGACGGGGACGGGCCTCGGATGCCAGGCAGGTGAGGGGAGGTGTGAGGAGAAAAGGGAGACTGAGCTGGATTGCTCTGCTCTCCTTGGCTGCTGGAAATCCCTGATGTGCTCACGCCAGGACTCAGAGCTCCTTCTGTCCCCATGGGGAGATCATCGATTGAACCAGACAGATCCTGAAACACACACGCAAGGATATTAGTGAAAGG	chr4	133695963	133696189		1
Inflammation_1	chr4	TXA0459149	ARID1A_t6_1	ACAATAGTGGTAGATTGGGGTGG	TGTTTGTTTGTTTTTCTTTTGTCTGG	183	52	ACAATAGTGGTAGATTGGGGTGGGTGCTCCTGCTAGTCCTCTGTCGAAACCCAAGCTCTCACCTCGATCTTGGGCAATGCTTGATTGGTTCATGGAAGGGTGCATGATGCTGTCTGACTGGCCACTGGGTGGCCGAGGTGGCATCTGGTTGCCTGCTCCAGACaaaagaaaaacaaacaaaca	chr4	133695510	133695692	One primer sits in the repeat region	4
Inflammation_1	ARID1A	TXA0459148	ARID1A_t6_2	GGTGCTCCTGCTAGTCCTCT	TTCCAGGTCCAAATTCACTCCTT	234	47	GGTGCTCCTGCTAGTCCTCTGTCGAAACCCAAGCTCTCACCTCGATCTTGGGCAATGCTTGATTGGTTCATGGAAGGGTGCATGATGCTGTCTGACTGGCCACTGGGTGGCCGAGGTGGCATCTGGTTGCCTGCTCCAGACaaaagaaaaacaaacaaacaaacaaaaaaaaaaaaacaaaaaacCATGGCTCAGCCTGAGAATCTTAAATAAGGAGTGAATTTGGACCTGGAA	chr4	133695532	133695765		7
Inflammation_1	chr4	TXA0459147	ARID1A_t8_6	GAGTGTGCCGTAAGGTGGGAT	ACCAAGGCTTGTGTTGTTTCCTC	178	57	GAGTGTGCCGTAAGGTGGGATTCCAGGCTGCCCATGCATCTGACCTCCAGCACCCATAGGGTTCATACTTCCGGCCATGCCTGCATTGGGGTAGTTGGCGTTGGGCAAGGCATTATAGTTAGGCTGCCTAGGATAGCCTCCTGGGGAGAGGTGGGGAGGAAACAACACAAGCCTTGGT	chr4	133693931	133694108		4
Inflammation_1	chr4	TXA0459146	ARID1A_t8_2	GCTTGTACACCAGAACCCTC	TATGGCCAATATGCCACCTC	160	52	GCTTGTACACCAGAACCCTCTCTTCACTCCCAGGCCTTACCTGTTTTGGATAGAGTTGGCAGCAACATGCATGGCAACAGCAGACTCTTGAGTTTTCCTGTTCATTCCCCCTGGTGGAGGACACATCCCTGACCCAACCTGAGGTGGCATATTGGCCATA	chr4	133693718	133693877		5
Inflammation_1	chr4	TXA0459145	ARID1A_t8_4	ATTCCCCCTGGTGGAGGAC	AAGTATGAACCCTATGGGTGCTG	180	57	ATTCCCCCTGGTGGAGGACACATCCCTGACCCAACCTGAGGTGGCATATTGGCCATATTAGGGCCATAGGGCCTGTTGCCCATAGACGCATGAGCCATTCTCCCTGGAGGGAGTGTGCCGTAAGGTGGGATTCCAGGCTGCCCATGCATCTGACCTCCAGCACCCATAGGGTTCATACTT	chr4	133693821	133694000		7
Inflammation_1	chr4	TXA0459144	ARID1A_t7_2	AACACAGTACCTCTCTTTCCTTC	GATGCCCCAGTACACTTCCC	189	60	AACACAGTACCTCTCTTTCCTTCTAAAGGGGTAGCACACTTACCTTGTGGGCCATACTGACTGCCCTGGGGGCCGTAGCTCCCCATGGAGTTCTGCTGGTAGGAGCCCACGCCCGAGTGCATCTGTCCTCCAGACGGCTGACGTGGGGATAAGGCCGAGCCAGGCTGAGGGGAAGTGTACTGGGGCATC	chr4	133694620	133694808		5
Inflammation_1	chr4	TXA0459143	ARID1A_t7_4	CCATGGAGTTCTGCTGGTAGGA	CCATGCCAGAGGCGTTCAG	216	55	CCATGGAGTTCTGCTGGTAGGAGCCCACGCCCGAGTGCATCTGTCCTCCAGACGGCTGACGTGGGGATAAGGCCGAGCCAGGCTGAGGGGAAGTGTACTGGGGCATCTGGGGGTTCCTCTGCATATAACCTATGTGTGGAATGTATCCAAATAATTATCTGCTCAGTATAATGGGAATAAACGGCTTCCCCACTCCGCTGAACGCCTCTGGCATGG	chr4	133694702	133694917		1
Inflammation_1	ARID1A	TXA0459142	ARID1A_t7_3	CCTTGTGGGCCATACTGACTG	GGGGAAGCCGTTTATTCCCATT	231	56	CCTTGTGGGCCATACTGACTGCCCTGGGGGCCGTAGCTCCCCATGGAGTTCTGCTGGTAGGAGCCCACGCCCGAGTGCATCTGTCCTCCAGACGGCTGACGTGGGGATAAGGCCGAGCCAGGCTGAGGGGAAGTGTACTGGGGCATCTGGGGGTTCCTCTGCATATAACCTATGTGTGGAATGTATCCAAATAATTATCTGCTCAGTATAATGGGAATAAACGGCTTCCCC	chr4	133694662	133694892		3
Inflammation_1	ARID1A	TXA0459141	ARID1A_t7_1	GGATGCCCTACTCTTTTAACCCA	TATATGCAGAGGAACCCCCAGAT	238	58	GGATGCCCTACTCTTTTAACCCAGCCGTTAACACAGTACCTCTCTTTCCTTCTAAAGGGGTAGCACACTTACCTTGTGGGCCATACTGACTGCCCTGGGGGCCGTAGCTCCCCATGGAGTTCTGCTGGTAGGAGCCCACGCCCGAGTGCATCTGTCCTCCAGACGGCTGACGTGGGGATAAGGCCGAGCCAGGCTGAGGGGAAGTGTACTGGGGCATCTGGGGGTTCCTCTGCATATA	chr4	133694591	133694828		6
Inflammation_1	ARID1A	TXA0459140	ARID1A_t8_1	TCAATAACATACAAGTTCCGTTGC	AGAATGGCTCATGCGTCTATGG	236	51	TCAATAACATACAAGTTCCGTTGCATGCATGCGCTTGTACACCAGAACCCTCTCTTCACTCCCAGGCCTTACCTGTTTTGGATAGAGTTGGCAGCAACATGCATGGCAACAGCAGACTCTTGAGTTTTCCTGTTCATTCCCCCTGGTGGAGGACACATCCCTGACCCAACCTGAGGTGGCATATTGGCCATATTAGGGCCATAGGGCCTGTTGCCCATAGACGCATGAGCCATTCT	chr4	133693686	133693921		1
Inflammation_1	ARID1A	TXA0459139	ARID1A_t8_5	CCATAGACGCATGAGCCATTCT	TGTAGTTCTGGGACTTGCTAACC	229	56	CCATAGACGCATGAGCCATTCTCCCTGGAGGGAGTGTGCCGTAAGGTGGGATTCCAGGCTGCCCATGCATCTGACCTCCAGCACCCATAGGGTTCATACTTCCGGCCATGCCTGCATTGGGGTAGTTGGCGTTGGGCAAGGCATTATAGTTAGGCTGCCTAGGATAGCCTCCTGGGGAGAGGTGGGGAGGAAACAACACAAGCCTTGGTTAGCAAGTCCCAGAACTACA	chr4	133693900	133694128		8
Inflammation_1	chr4	TXA0459138	ARID1A_t8_3	CAGACTCTTGAGTTTTCCTGTTC	CAACGCCAACTACCCCAAT	236	56	CAGACTCTTGAGTTTTCCTGTTCATTCCCCCTGGTGGAGGACACATCCCTGACCCAACCTGAGGTGGCATATTGGCCATATTAGGGCCATAGGGCCTGTTGCCCATAGACGCATGAGCCATTCTCCCTGGAGGGAGTGTGCCGTAAGGTGGGATTCCAGGCTGCCCATGCATCTGACCTCCAGCACCCATAGGGTTCATACTTCCGGCCATGCCTGCATTGGGGTAGTTGGCGTTG	chr4	133693798	133694033		3
Inflammation_1	chr4	TXA0459137	ARID1A_t9_1	GGTCCAGTAGATTTTACTACCGCTT	CTCCCTATGGACAGGGGATCAAT	171	48	GGTCCAGTAGATTTTACTACCGCTTGAAGATCTTTCTTGAAGAAACTCCTGTGATGAGCACTCAATTACACTGACCTGCTGAATTGTTGGCCATGGTTCCACCCATAGGATATGGGGGTCCCTGAGGGTTGATCATGCCAGCCATACTATTGATCCCCTGTCCATAGGGAG	chr4	133692930	133693100		8
Inflammation_1	chr4	TXA0459136	ARID1A_t9_3	GGGGTCCCTGAGGGTTGAT	TCCTCATTCCCAAATGTAGAGGT	176	49	GGGGTCCCTGAGGGTTGATCATGCCAGCCATACTATTGATCCCCTGTCCATAGGGAGGTCCAGTTCCCATCATGCCCCCTTGATTCATATTTGGGTAGCCTGGTGGCCTAAGGAAGAAGATGAACATTAAAGAGAAGGTTAGAGACACAGTGAACCTCTACATTTGGGAATGAGGA	chr4	133693044	133693219		7
Inflammation_1	ARID1A	TXA0459135	ARID1A_t9_2	TTGAAGAAACTCCTGTGATGAGC	AGAGGTTCACTGTGTCTCTAACC	237	48	TTGAAGAAACTCCTGTGATGAGCACTCAATTACACTGACCTGCTGAATTGTTGGCCATGGTTCCACCCATAGGATATGGGGGTCCCTGAGGGTTGATCATGCCAGCCATACTATTGATCCCCTGTCCATAGGGAGGTCCAGTTCCCATCATGCCCCCTTGATTCATATTTGGGTAGCCTGGTGGCCTAAGGAAGAAGATGAACATTAAAGAGAAGGTTAGAGACACAGTGAACCTCT	chr4	133692966	133693202		4
Inflammation_1	chr4	TXA0459134	ARID1A_t10_2	TGTATCATTCAGCAAAGGGGATA	ATCTTCAAGCGGTAGTAAAATCT	218	42	TGTATCATTCAGCAAAGGGGATAAGATACAAAATTGAAAGGGCAAAAGATAAAAACCTTAGATTTGGATTCTGTCTTGGGTGTTCCATCTGCCTTGTTGTTCATTTTTGTGGCGGGAGTTAACTTAACATCCCCAAGGCCCATCATCTCTGGGCTGGCTGCCATCCCTGTAAAAAGATACCAGTTCAGGTCCAGTAGATTTTACTACCGCTTGAAGAT	chr4	133692743	133692960		2
Inflammation_1	ARID1A	TXA0459133	ARID1A_t10_1	ctccctggctCTCAATTTTCCTT	ACTGGACCTGAACTGGTATCTTT	217	44	ctccctggctCTCAATTTTCCTTGTATCATTCAGCAAAGGGGATAAGATACAAAATTGAAAGGGCAAAAGATAAAAACCTTAGATTTGGATTCTGTCTTGGGTGTTCCATCTGCCTTGTTGTTCATTTTTGTGGCGGGAGTTAACTTAACATCCCCAAGGCCCATCATCTCTGGGCTGGCTGCCATCCCTGTAAAAAGATACCAGTTCAGGTCCAGT	chr4	133692721	133692937	One primer sits in the repeat region	1
Inflammation_1	chr4	TXA0459132	ARID1A_t11_1	GTGTCTTGGAGCACGAACT	CCGGTACCTGGCCTTCAC	189	54	GTGTCTTGGAGCACGAACTCCATGGGATGAATGGTACTCTCAGAAGCAAACTGTCTGGTGCTTACCTGAGTCAACCCACCAATCTCCTTCACAGACACATAGAGGCGATAGAGGTCCAGAGGCTTCCTCCCCACAGCAGGCAGATTTGTCATGCCCATGGCCTTCTCCTCTGTGAAGGCCAGGTACCGG	chr4	133691005	133691193		6
Inflammation_1	chr4	TXA0459131	ARID1A_t11_4	CCACAGCAGGCAGATTTGTCAT	GTTTCTCTGGTTTCAACCCACCC	173	53	CCACAGCAGGCAGATTTGTCATGCCCATGGCCTTCTCCTCTGTGAAGGCCAGGTACCGGTCCACCCACATCTTCCTCTCGGGCTCACCACCCAACTCATACAATTTGGTGATCTTCTCATTGGTGGTGGTAGAAGAACTGGATTTCTGGAGGGTGGGTTGAAACCAGAGAAAC	chr4	133691135	133691307		5
Inflammation_1	chr4	TXA0459130	ARID1A_t12_4	GGTCTTCTCCACGCTCGAT	TATTCTGACTCTTCTGGTGGTCT	167	46	GGTCTTCTCCACGCTCGATCTTGCACTCAAAGGCATAGAGACATTGGATATACTGCTTTTTCAGTGAGCTGGCAGCACTGCTTGATGTACCCACATTGAGGTTGGTTGCAAGTTCCCGCCATTTTTTGTTCTTGTTGACCTGAAAGACCACCAGAAGAGTCAGAATA	chr4	133689123	133689289		4
Inflammation_1	chr4	TXA0459129	ARID1A_t12_2	CTCTCAGCTTTGGGGTGAGG	ACTGAAAAAGCAGTATATCCAATGTC	189	54	CTCTCAGCTTTGGGGTGAGGGGGTGGGGTAGGGTAGGGTACTCAGCCATTCTTACCAGGAGAGGGGGGCTGGATCTTGGGTTGGGACTTCTTGGAGTCAGCAGCTGCGAAGATATCGGGGGGAGGGTCTTCTCCACGCTCGATCTTGCACTCAAAGGCATAGAGACATTGGATATACTGCTTTTTCAGT	chr4	133688999	133689187		2
Inflammation_1	ARID1A	TXA0459128	ARID1A_t11_2	CGAACTCCATGGGATGAATGGTA	ATTGTATGAGTTGGGTGGTGAGC	221	54	CGAACTCCATGGGATGAATGGTACTCTCAGAAGCAAACTGTCTGGTGCTTACCTGAGTCAACCCACCAATCTCCTTCACAGACACATAGAGGCGATAGAGGTCCAGAGGCTTCCTCCCCACAGCAGGCAGATTTGTCATGCCCATGGCCTTCTCCTCTGTGAAGGCCAGGTACCGGTCCACCCACATCTTCCTCTCGGGCTCACCACCCAACTCATACAAT	chr4	133691018	133691238		7
Inflammation_1	ARID1A	TXA0459127	ARID1A_t11_3	ATAGAGGCGATAGAGGTCCAGAG	GTGTGCATAGGCTTTGACTTTGA	228	52	ATAGAGGCGATAGAGGTCCAGAGGCTTCCTCCCCACAGCAGGCAGATTTGTCATGCCCATGGCCTTCTCCTCTGTGAAGGCCAGGTACCGGTCCACCCACATCTTCCTCTCGGGCTCACCACCCAACTCATACAATTTGGTGATCTTCTCATTGGTGGTGGTAGAAGAACTGGATTTCTGGAGGGTGGGTTGAAACCAGAGAAACTCAAAGTCAAAGCCTATGCACAC	chr4	133691103	133691330		3
Inflammation_1	ARID1A	TXA0459126	ARID1A_t12_3	GGTTGGGACTTCTTGGAGTCAG	AACTGGAAGGCTGGGTCATCTAT	235	49	GGTTGGGACTTCTTGGAGTCAGCAGCTGCGAAGATATCGGGGGGAGGGTCTTCTCCACGCTCGATCTTGCACTCAAAGGCATAGAGACATTGGATATACTGCTTTTTCAGTGAGCTGGCAGCACTGCTTGATGTACCCACATTGAGGTTGGTTGCAAGTTCCCGCCATTTTTTGTTCTTGTTGACCTGAAAGACCACCAGAAGAGTCAGAATATAGATGACCCAGCCTTCCAGTT	chr4	133689077	133689311		8
Inflammation_1	ARID1A	TXA0459125	ARID1A_t12_1	TAAGGAAGTGTGCTCTCAGCTTT	TCAATGTGGGTACATCAAGCAGT	235	54	TAAGGAAGTGTGCTCTCAGCTTTGGGGTGAGGGGGTGGGGTAGGGTAGGGTACTCAGCCATTCTTACCAGGAGAGGGGGGCTGGATCTTGGGTTGGGACTTCTTGGAGTCAGCAGCTGCGAAGATATCGGGGGGAGGGTCTTCTCCACGCTCGATCTTGCACTCAAAGGCATAGAGACATTGGATATACTGCTTTTTCAGTGAGCTGGCAGCACTGCTTGATGTACCCACATTGA	chr4	133688987	133689221		5
Inflammation_1	chr4	TXA0459122	ARID1A_t14_1	CCAAGCCACTCAAACTCCACAAG	GAAGTGACCCCACATTCCAGAAG	179	50	CCAAGCCACTCAAACTCCACAAGCATAAGCCAGCAGTCAGTTACCTTTCCTCATGCTGCCATAAGGATCCTTATTTGGCTCATAGGACATGCGCCCCATCATGTCAGAGGTATTCATACTGGGCTGGTACCCAGGGTTTGGAGTCATGGAATTCCGCTTCTGGAATGTGGGGTCACTTC	chr4	133687160	133687338		4
Inflammation_1	chr4	TXA0459121	ARID1A_t14_3	GCCCCATCATGTCAGAGGTATTC	CCGTGGTTCTTGGCTTAGCTG	189	53	GCCCCATCATGTCAGAGGTATTCATACTGGGCTGGTACCCAGGGTTTGGAGTCATGGAATTCCGCTTCTGGAATGTGGGGTCACTTCCATCAGGAAAGGCATCCTGGATTCCGACTGAGTTGCTCCTGCTCCAGAGTGAGGAAAACTAATGAAGCCTCCCACAGAGCTCAGCTAAGCCAAGAACCACGG	chr4	133687252	133687440		7
Inflammation_1	ARID1A	TXA0459120	ARID1A_t13_1	GTTACCCAAGTTTCACCCCCAG	GTTAGCAGCTCACTCTGCATCTC	217	53	GTTACCCAAGTTTCACCCCCAGAGACACTCAGCGTTCCTGATCATTCCTTACCTCATGCCTGGTAAGGGGGGAATTTGACTATGTGGTGTGGATGCTGGAGTTGGTGGCTTCAGGTCTCCTCCTTCTGCCATAGAACTGCTGGTTGACTGAGGAGTTTGTGGCCCCTGCATAGACCCTGATCCCGCTGTGGACAGAGATGCAGAGTGAGCTGCTAAC	chr4	133687486	133687702		6
Inflammation_1	ARID1A	TXA0459119	ARID1A_t14_2	AAGCATAAGCCAGCAGTCAGTTA	CTCTGTGGGAGGCTTCATTAGTT	238	50	AAGCATAAGCCAGCAGTCAGTTACCTTTCCTCATGCTGCCATAAGGATCCTTATTTGGCTCATAGGACATGCGCCCCATCATGTCAGAGGTATTCATACTGGGCTGGTACCCAGGGTTTGGAGTCATGGAATTCCGCTTCTGGAATGTGGGGTCACTTCCATCAGGAAAGGCATCCTGGATTCCGACTGAGTTGCTCCTGCTCCAGAGTGAGGAAAACTAATGAAGCCTCCCACAGAG	chr4	133687180	133687417		1
Inflammation_1	chr4	TXA0459118	ARID1A_t15_2	CTTCAGGGTAGCAAGAGTTGGG	AGTGATCCCTTCATGTCCTCA	186	63	CTTCAGGGTAGCAAGAGTTGGGCAGGGCCGGGGCAGGGCTCACCTCACTCTGTCGTAAGGACCTCCATAGGGATAGTGCTGCCGTGGTCCCATCGCCACACTTCCCAGCCCAGGGCCAGCAGCACGGCTGTAGGGATCACCCATCCCGCCATTGGGGCCCTGCCCTGAGGACATGAAGGGATCACT	chr4	133686597	133686782		5
Inflammation_1	chr4	TXA0459117	ARID1A_t15_3	GGACCTCCATAGGGATAGTGCT	AACCGTGGGGTAGGGATGTG	218	60	GGACCTCCATAGGGATAGTGCTGCCGTGGTCCCATCGCCACACTTCCCAGCCCAGGGCCAGCAGCACGGCTGTAGGGATCACCCATCCCGCCATTGGGGCCCTGCCCTGAGGACATGAAGGGATCACTTCCTGGCGCTGAGGGCAGAAAAGAAGGCAATGAGTGAGAAAACCAGCATGTTGGCAGGCTCTGCAGTCTACACATCCCTACCCCACGGTT	chr4	133686655	133686872		8
Inflammation_1	chr4	TXA0459116	ARID1A_t16_3	TTACTCACCGTTGCTGTTGCT	AACTCTTGCTACCCTGAAGCTAT	220	54	TTACTCACCGTtgctgttgctgctgttgctgctgttgctgctgctgctgcGGGGGGTAGCGGCTAGGAGAATACATCCCCGAATCTGGGGTGGAAGGCATGAGATTTGGCTGAGGGGCTCCAGTGCCCATATTTCCTTCAGGCCCGATTCCAGGCTCCGTCCTAAACACAATTAGAGAAGGGAATTGAGCATGGTCTATAGCTTCAGGGTAGCAAGAGTT	chr4	133686396	133686615	One primer sits in the repeat region	4
Inflammation_1	chr4	TXA0459115	ARID1A_t16_2	ATTGCCATAGGAATCATGTCTGC	CATGCCTTCCACCCCAG	190	51	ATTGCCATAGGAATCATGTCTGCAGAAAACAAAAAGGGTCAAGGTGGAGAATCACAAAACCTGAGAAACACAGACAGAGGAACCAGGATTTACTCACCGTtgctgttgctgctgttgctgctgttgctgctgctgctgcGGGGGGTAGCGGCTAGGAGAATACATCCCCGAATCTGGGGTGGAAGGCATG	chr4	133686307	133686496		1
Inflammation_1	ARID1A	TXA0459114	ARID1A_t15_1	GAGCATGGTCTATAGCTTCAGGG	TCACTCATTGCCTTCTTTTCTGC	238	61	GAGCATGGTCTATAGCTTCAGGGTAGCAAGAGTTGGGCAGGGCCGGGGCAGGGCTCACCTCACTCTGTCGTAAGGACCTCCATAGGGATAGTGCTGCCGTGGTCCCATCGCCACACTTCCCAGCCCAGGGCCAGCAGCACGGCTGTAGGGATCACCCATCCCGCCATTGGGGCCCTGCCCTGAGGACATGAAGGGATCACTTCCTGGCGCTGAGGGCAGAAAAGAAGGCAATGAGTGA	chr4	133686582	133686819		2
Inflammation_1	ARID1A	TXA0459113	ARID1A_t16_1	GGTGCCTTGGGTAGAGAATTGAT	TGGAGCCCCTCAGCCAAAT	232	52	GGTGCCTTGGGTAGAGAATTGATTGCCATAGGAATCATGTCTGCAGAAAACAAAAAGGGTCAAGGTGGAGAATCACAAAACCTGAGAAACACAGACAGAGGAACCAGGATTTACTCACCGTtgctgttgctgctgttgctgctgttgctgctgctgctgcGGGGGGTAGCGGCTAGGAGAATACATCCCCGAATCTGGGGTGGAAGGCATGAGATTTGGCTGAGGGGCTCCA	chr4	133686286	133686517		7
Inflammation_1	ARID1A	TXA0459112	ARID1A_t16_4	GGTAGCGGCTAGGAGAATACATC	CCTATGGAGGTCCTTACGACAGA	218	56	GGTAGCGGCTAGGAGAATACATCCCCGAATCTGGGGTGGAAGGCATGAGATTTGGCTGAGGGGCTCCAGTGCCCATATTTCCTTCAGGCCCGATTCCAGGCTCCGTCCTAAACACAATTAGAGAAGGGAATTGAGCATGGTCTATAGCTTCAGGGTAGCAAGAGTTGGGCAGGGCCGGGGCAGGGCTCACCTCACTCTGTCGTAAGGACCTCCATAGG	chr4	133686450	133686667		3
Inflammation_1	chr4	TXA0459111	ARID1A_t17_2	CTTCCTGCTTTCTAGGGGTGTG	AGGTTTTGTGATTCTCCACCTTG	190	52	CTTCCTGCTTTCTAGGGGTGTGCCAGCAGATCCCCAACTGCCTTCCTTACCTGCTGCTGCTGCTGATACATTGTGGTCTGCTGGCTGGGGAAGGGGCTGCTGGAAGGGGTGCCTTGGGTAGAGAATTGATTGCCATAGGAATCATGTCTGCAGAAAACAAAAAGGGTCAAGGTGGAGAATCACAAAACCT	chr4	133686179	133686368		3
Inflammation_1	chr4	TXA0459110	ARID1A_t18_6	AGACTTGCTAGGAGAAGTACGG	GGCCCATGGCCTTCCC	186	62	AGACTTGCTAGGAGAAGTACGGTTCTCCATGGGCCGGGGGAGGGGAGCGGGGCTGGATACCTGAGGAATGTGATTCGGCATGCTTGGTGGGGGCTGGTAGTTAGATGGAGGGGGCCTTGTCATGGGGGGAACAGGGGCTGAAGGACCATACGGAGGCTGGCGTGTGCCATGGGAAGGCCATGGGCC	chr4	133685055	133685240		5
Inflammation_1	chr4	TXA0459109	ARID1A_t18_11	CATGTCATTTCGCCCCTG	CAGCAATGCCTACCCTG	220	60	CATGTCATTTCGCCCCTGCCACATGGTGCCCTGCTGAGCAACCTCAGCTGATGCCTGTATGGGGCCACCCATCATTTGTGGTGGCATGTTCTGCTGGGCACTGGAACCAGGAGGTGCAGAGACTCGGTCTCGGCCAAACTGGAATGGAAATTGGTTCTGGGGGCCGCCTGCTGGTCGGCGATCAGTAGCAGCGGTGGCGGAGGCAGGGTAGGCATTGCTG	chr4	133685355	133685574		3
Inflammation_1	chr4	TXA0459108	ARID1A_t18_15	TCCTGCTGAGGGGAAGG	TCGGTACACAGTATTAATCTCCC	219	57	TCCTGCTGAGGGGAAGGCTGGGCAGCTTGTGGCTGGCTGGCAGGCTGGGACTGAGCTGCAGGCAACTGCTGCTGTTGAGGCTGGCCTTGCCCAGCGCTGTACGGCACACTGTACATCTCCCCTTCATGCCGCTTGGCAGGGGGGCCATATGTGCCATCCATTGGCCTCTTATAATTCTAAAACAGAGAACGCAAAGGGGAGATTAATACTGTGTACCGA	chr4	133685590	133685808		4
Inflammation_1	chr4	TXA0459107	ARID1A_t18_3	CTCTACAGAGCCAGGTGGGAAG	GTATCCAGCCCCGCTCC	189	60	CTCTACAGAGCCAGGTGGGAAGGTGATATCCCGCCGAATCATAGGCGGCTGCACAGGGGTAGGCGCTATGTGCGAAGCAGGCACCGGTGGACCCGCCTTTTGCATTTTCATCCCAGAGTGCAGGAATGGAGACTTGCTAGGAGAAGTACGGTTCTCCATGGGCCGGGGGAGGGGAGCGGGGCTGGATAC	chr4	133684926	133685114		8
Inflammation_1	chr4	TXA0459106	ARID1A_t18_2	AGATGGAAAGGGGTAGATTGAGC	CTTCGCACATAGCGCCTACC	177	55	AGATGGAAAGGGGTAGATTGAGCCACCCAATCAGGGAGGTATCCTTACCAATGTCTTTCATTGTGAGCCGCCTTCTCTGCTTCAACACAGGCTGAGTGGCCTCTACAGAGCCAGGTGGGAAGGTGATATCCCGCCGAATCATAGGCGGCTGCACAGGGGTAGGCGCTATGTGCGAAG	chr4	133684826	133685002		6
Inflammation_1	chr4	TXA0459105	ARID1A_t18_13	AACTGGAATGGAAATTGGTTCTG	AGATGTACAGTGTGCCGTA	217	62	AACTGGAATGGAAATTGGTTCTGGGGGCCGCCTGCTGGTCGGCGATCAGTAGCAGCGGTGGCGGAGGCAGGGTAGGCATTGCTGTACTGGTTGTACACGTCCTGCTGAGGGGAAGGCTGGGCAGCTTGTGGCTGGCTGGCAGGCTGGGACTGAGCTGCAGGCAACTGCTGCTGTTGAGGCTGGCCTTGCCCAGCGCTGTACGGCACACTGTACATCT	chr4	133685491	133685707		8
Inflammation_1	chr4	TXA0459104	ARID1A_t18_9	TGGAGCATTTCATCTGTTCGGTT	AGCAGAACATGCCACCACAAA	184	55	TGGAGCATTTCATCTGTTCGGTTCACACCATGATACGCAGGGCCCTGGGTGGCAGAGCCTGTGTTCTGCCTGTTGGCATAATTGTAGGTCATGTCATTTCGCCCCTGCCACATGGTGCCCTGCTGAGCAACCTCAGCTGATGCCTGTATGGGGCCACCCATCATTTGTGGTGGCATGTTCTGCT	chr4	133685266	133685449		7
Inflammation_1	chr4	TXA0459103	ARID1A_t18_7	GCTGGTAGTTAGATGGAGGG	AGGCAGAACACAGGCTC	190	59	GCTGGTAGTTAGATGGAGGGGGCCTTGTCATGGGGGGAACAGGGGCTGAAGGACCATACGGAGGCTGGCGTGTGCCATGGGAAGGCCATGGGCCTTCATGGTTGGCCCTCTGATCTGTGTGGAGCATTTCATCTGTTCGGTTCACACCATGATACGCAGGGCCCTGGGTGGCAGAGCCTGTGTTCTGCCT	chr4	133685147	133685336		1
Inflammation_1	ARID1A	TXA0459102	ARID1A_t17_1	TCTTGGTTGCTTCCTGCTTTCTA	aACGGTGAGTAAATCCTGGTTCC	238	51	TCTTGGTTGCTTCCTGCTTTCTAGGGGTGTGCCAGCAGATCCCCAACTGCCTTCCTTACCTGCTGCTGCTGCTGATACATTGTGGTCTGCTGGCTGGGGAAGGGGCTGCTGGAAGGGGTGCCTTGGGTAGAGAATTGATTGCCATAGGAATCATGTCTGCAGAAAACAAAAAGGGTCAAGGTGGAGAATCACAAAACCTGAGAAACACAGACAGAGGAACCAGGATTTACTCACCGTt	chr4	133686170	133686407	One primer sits in the repeat region	6
Inflammation_1	ARID1A	TXA0459101	ARID1A_t18_12	CTGGGCACTGGAACCAGGA	AAGGCCAGCCTCAACAGC	230	63	CTGGGCACTGGAACCAGGAGGTGCAGAGACTCGGTCTCGGCCAAACTGGAATGGAAATTGGTTCTGGGGGCCGCCTGCTGGTCGGCGATCAGTAGCAGCGGTGGCGGAGGCAGGGTAGGCATTGCTGTACTGGTTGTACACGTCCTGCTGAGGGGAAGGCTGGGCAGCTTGTGGCTGGCTGGCAGGCTGGGACTGAGCTGCAGGCAACTGCTGCTGTTGAGGCTGGCCTT	chr4	133685448	133685677		6
Inflammation_1	ARID1A	TXA0459100	ARID1A_t18_8	GAACAGGGGCTGAAGGACCATA	CTGAGGTTGCTCAGCAGGG	219	58	GAACAGGGGCTGAAGGACCATACGGAGGCTGGCGTGTGCCATGGGAAGGCCATGGGCCTTCATGGTTGGCCCTCTGATCTGTGTGGAGCATTTCATCTGTTCGGTTCACACCATGATACGCAGGGCCCTGGGTGGCAGAGCCTGTGTTCTGCCTGTTGGCATAATTGTAGGTCATGTCATTTCGCCCCTGCCACATGGTGCCCTGCTGAGCAACCTCAG	chr4	133685183	133685401		8
Inflammation_1	ARID1A	TXA0459099	ARID1A_t18_14	TTGCTGTACTGGTTGTACACGTC	TCCCCTTTGCGTTCTCTGTTTTA	221	58	TTGCTGTACTGGTTGTACACGTCCTGCTGAGGGGAAGGCTGGGCAGCTTGTGGCTGGCTGGCAGGCTGGGACTGAGCTGCAGGCAACTGCTGCTGTTGAGGCTGGCCTTGCCCAGCGCTGTACGGCACACTGTACATCTCCCCTTCATGCCGCTTGGCAGGGGGGCCATATGTGCCATCCATTGGCCTCTTATAATTCTAAAACAGAGAACGCAAAGGGGA	chr4	133685569	133685789		5
Inflammation_1	ARID1A	TXA0459098	ARID1A_t18_10	TGCCTGTTGGCATAATTGTAGGT	CCACCGCTGCTACTGATCG	220	58	TGCCTGTTGGCATAATTGTAGGTCATGTCATTTCGCCCCTGCCACATGGTGCCCTGCTGAGCAACCTCAGCTGATGCCTGTATGGGGCCACCCATCATTTGTGGTGGCATGTTCTGCTGGGCACTGGAACCAGGAGGTGCAGAGACTCGGTCTCGGCCAAACTGGAATGGAAATTGGTTCTGGGGGCCGCCTGCTGGTCGGCGATCAGTAGCAGCGGTGG	chr4	133685332	133685551		5
Inflammation_1	ARID1A	TXA0459097	ARID1A_t18_5	CAGGAATGGAGACTTGCTAGGAG	AAATGCTCCACACAGATCAGAGG	230	60	CAGGAATGGAGACTTGCTAGGAGAAGTACGGTTCTCCATGGGCCGGGGGAGGGGAGCGGGGCTGGATACCTGAGGAATGTGATTCGGCATGCTTGGTGGGGGCTGGTAGTTAGATGGAGGGGGCCTTGTCATGGGGGGAACAGGGGCTGAAGGACCATACGGAGGCTGGCGTGTGCCATGGGAAGGCCATGGGCCTTCATGGTTGGCCCTCTGATCTGTGTGGAGCATTT	chr4	133685046	133685275		2
Inflammation_1	ARID1A	TXA0459096	ARID1A_t18_4	GTGATATCCCGCCGAATCATAGG	CAAGGCCCCCTCCATCTAACTA	226	60	GTGATATCCCGCCGAATCATAGGCGGCTGCACAGGGGTAGGCGCTATGTGCGAAGCAGGCACCGGTGGACCCGCCTTTTGCATTTTCATCCCAGAGTGCAGGAATGGAGACTTGCTAGGAGAAGTACGGTTCTCCATGGGCCGGGGGAGGGGAGCGGGGCTGGATACCTGAGGAATGTGATTCGGCATGCTTGGTGGGGGCTGGTAGTTAGATGGAGGGGGCCTTG	chr4	133684948	133685173		4
Inflammation_1	ARID1A	TXA0459095	ARID1A_t18_1	AGGGAACCATGTGAAAGATGGAA	TCTGGGATGAAAATGCAAAAGGC	232	55	AGGGAACCATGTGAAAGATGGAAAGGGGTAGATTGAGCCACCCAATCAGGGAGGTATCCTTACCAATGTCTTTCATTGTGAGCCGCCTTCTCTGCTTCAACACAGGCTGAGTGGCCTCTACAGAGCCAGGTGGGAAGGTGATATCCCGCCGAATCATAGGCGGCTGCACAGGGGTAGGCGCTATGTGCGAAGCAGGCACCGGTGGACCCGCCTTTTGCATTTTCATCCCAGA	chr4	133684811	133685042		3
Inflammation_1	chr4	TXA0459094	ARID1A_t20_12	CTCTCAGGATATGGGGATAGGTC	CACCACAAGCACCCAGAG	185	56	CTCTCAGGATATGGGGATAGGTCCAATTGCCCCGAGATGTTGGCGAGGGTGACCAGCGTGTTTTCTCGGAGCATCTCCAAGCAGTCCCACCACCACTCCACTTTGTCACAGCTCACCCCTTGGTCCTGTTCCTCCTCCTTCTCATAAGTTAGTGGTGCCTGCTTCCGCTCTGGGTGCTTGTGGTG	chr4	133680953	133681137		8
Inflammation_1	chr4	TXA0459093	ARID1A_t20_23	GTGTAGCAGGCCACTGTCAAA	AAGAGGAAGAAGGGGTTGGAAAT	200	49	GTGTAGCAGGCCACTGTCAAACTCCTGCACGCGCCCAAGCTTATCTGAGCAGTCCACCACAAATGGGTCATTCCTCTGCACGATCTTTACCGGAAGCTTGTCAAACTTACTGACTAGCTTCTCCTCATTATTCTCTGAAGATGGCTTGTCCTTGCCCAAAAAGGCCATCTCCTCATCATTTCCAACCCCTTCTTCCTCTT	chr4	133681660	133681859		5
Inflammation_1	chr4	TXA0459092	ARID1A_t20_21	TGTTGTGAGGTGTTTCCGAGG	CCCATTTGTGGTGGACTGCTC	190	57	TGTTGTGAGGTGTTTCCGAGGGGGCGTTGGGCAGGGCACATAAGGCCGGGAAGGCAGCAGCTCTATCTTGCTCTCAAAGTGGGTCTGGATATGCTCAGTGGTATCCCCACCACCAATCCGCCAGTGTAGCAGGCCACTGTCAAACTCCTGCACGCGCCCAAGCTTATCTGAGCAGTCCACCACAAATGGG	chr4	133681537	133681726		6
Inflammation_1	chr4	TXA0459090	ARID1A_t20_8	CCATGGTACTATACAACTTCTCC	CTGGACGGACTCCTACACT	202	57	CCATGGTACTATACAACTTCTCCAGGCGGCTAAAAGGGGGAGTGGCCAGGATCAGGTCCACATTGTTGTCCTGGATGCTGAGTTTGCTGAGGGTTTCCAAGACCAATCTCTGGGGGGAGAGGACGGCATTGGGGCCTAGGGTTGAGAAGGGGTCCTGGGCTTCAGCTGAAGGGCAAACTGCCCAGTGTAGGAGTCCGTCCAG	chr4	133680735	133680936		3
Inflammation_1	chr4	TXA0459089	ARID1A_t20_26	TCTTCCTCTTCCTCCTCCAGTTT	AGCTCCTTGTGGAATATTTCCGT	190	45	TCTTCCTCTTCCTCCTCCAGTTTAGGATCAAGGTGTTCTTCCTCTTCTTCCTCTGTATGGGCTGGACTATACACCTTGGTGAATCTCCCAGGGTCTAGTAATGTTCTCTGTCCTGGGTCCCCTACCTCATACTCCTTTAAAATGCCAAAGATTTCAATTAGGCATCTACGGAAATATTCCACAAGGAGCT	chr4	133681850	133682039		6
Inflammation_1	chr4	TXA0459088	ARID1A_t20_19	TGCTAGACCGGGTAGACAACA	GGATACCACTGAGCATATCCAGAC	215	59	TGCTAGACCGGGTAGACAACATGTCATCCATGGTGGCTGTGATCCTTTTCTCTGGAAGGCCATCGGGCGGGGGGCCCTCCTGCTCCGTTGTCCCTGGTGTGCCCTCTACTGTTGTGAGGTGTTTCCGAGGGGGCGTTGGGCAGGGCACATAAGGCCGGGAAGGCAGCAGCTCTATCTTGCTCTCAAAGTGGGTCTGGATATGCTCAGTGGTATCC	chr4	133681428	133681642		7
Inflammation_1	chr4	TXA0459087	ARID1A_t20_3	GACACGGAGATGTCCAACAG	AGCCTTGCTGCCACAC	188	57	GACACGGAGATGTCCAACAGCCGTGACTCATACAGAGTGAACTCTGAGTGGTTCTCATCCACCTTGGCCAGGGCAAGCAGTGCTCGGGCAGCCCGCCGCATCATGTCCACACTAGTTGGTTCAAAGGGTGGATTCTGCATATGCAGGAGGCTTGCCTGGCTCTGCTGGAACTGTGTGGCAGCAAGGCT	chr4	133680398	133680585		8
Inflammation_1	chr4	TXA0459086	ARID1A_t20_28	GTCCCCTACCTCATACTCCTTTA	ggagagagagAATAAATATGAATTGG	174	41	GTCCCCTACCTCATACTCCTTTAAAATGCCAAAGATTTCAATTAGGCATCTACGGAAATATTCCACAAGGAGCTCTAGCAAGCCTGGGAGCTGAAAGAGAGAAAAAAAGGAAGGGAAGAATTCTTGACAGGAGTTCCCAAGATCTTATCCAATTCATATTTATTctctctctcc	chr4	133681966	133682139	One primer sits in the repeat region	7
Inflammation_1	chr4	TXA0459085	ARID1A_t20_10	GAGAGGACGGCATTGGG	CTGTGACAAAGTGGAGTGGT	213	59	GAGAGGACGGCATTGGGGCCTAGGGTTGAGAAGGGGTCCTGGGCTTCAGCTGAAGGGCAAACTGCCCAGTGTAGGAGTCCGTCCAGGACAGGCAGGCAGATGCTCTCAGGATATGGGGATAGGTCCAATTGCCCCGAGATGTTGGCGAGGGTGACCAGCGTGTTTTCTCGGAGCATCTCCAAGCAGTCCCACCACCACTCCACTTTGTCACAG	chr4	133680851	133681063		7
Inflammation_1	chr4	TXA0459084	ARID1A_t20_25	TATTCTCTGAAGATGGCTTGTCC	TACTAGACCCTGGGAGATTCA	162	48	TATTCTCTGAAGATGGCTTGTCCTTGCCCAAAAAGGCCATCTCCTCATCATTTCCAACCCCTTCTTCCTCTTCCTCCTCCAGTTTAGGATCAAGGTGTTCTTCCTCTTCTTCCTCTGTATGGGCTGGACTATACACCTTGGTGAATCTCCCAGGGTCTAGTA	chr4	133681788	133681949		2
Inflammation_1	chr4	TXA0459083	ARID1A_t20_16	GGCACAAACGACAGGCTCC	CCACCAAGGAAAGCAGCAAG	190	52	GGCACAAACGACAGGCTCCGGATGGTATTGGAGACACAGACACAGCGCTTAGCAAGGGAATCCTGCCAGTCCAGAAGGGTACACAGTGGGGTCTCATCCTTACTATGGGGTTCATCCTCTAAAATTTTGATGTTCCGGTGGCTCTGTGCTGGGCTAATGCCAAATGGAAACTTGCTGCTTTCCTTGGTGG	chr4	133681205	133681394		6
Inflammation_1	chr4	TXA0459082	ARID1A_t20_18	TTCCGGTGGCTCTGTG	CAGGGACAACGGAGCAG	187	57	TTCCGGTGGCTCTGTGCTGGGCTAATGCCAAATGGAAACTTGCTGCTTTCCTTGGTGGCCTCTGCACTCTTTGCCCCCTCATCAGTCAATGTGCTAGACCGGGTAGACAACATGTCATCCATGGTGGCTGTGATCCTTTTCTCTGGAAGGCCATCGGGCGGGGGGCCCTCCTGCTCCGTTGTCCCTG	chr4	133681337	133681523		4
Inflammation_1	chr4	TXA0459081	ARID1A_t20_6	ATGCTGCCCTTCTGCAC	AACAATGTGGACCTGATCCTG	188	60	ATGCTGCCCTTCTGCACTGCAATGGCCCGGGCTGCCAGGCTGTCCCCCTGGGCCAGATTTGCCAGCAGTACCACGGCCATCTCCCGGCACACTGGGTTCTTTCGGTCACTGAGGAAGCGCACCATGGTACTATACAACTTCTCCAGGCGGCTAAAAGGGGGAGTGGCCAGGATCAGGTCCACATTGTT	chr4	133680614	133680801		6
Inflammation_1	chr4	TXA0459080	ARID1A_t20_14	CTTGGTCCTGTTCCTCCTC	CTTGCTAAGCGCTGTGTC	190	55	CTTGGTCCTGTTCCTCCTCCTTCTCATAAGTTAGTGGTGCCTGCTTCCGCTCTGGGTGCTTGTGGTGCAGCAGGATCAGCTTGCCCAGGATAAGCAGCAGCCCTGGGTGTTTGGACATCTCAAAGTCGTTGCCTGGCACAAACGACAGGCTCCGGATGGTATTGGAGACACAGACACAGCGCTTAGCAAG	chr4	133681071	133681260		1
Inflammation_1	chr4	TXA0459079	ARID1A_t20_4	CCGCATCATGTCCACACTA	GTGTGCCGGGAGATGG	213	61	CCGCATCATGTCCACACTAGTTGGTTCAAAGGGTGGATTCTGCATATGCAGGAGGCTTGCCTGGCTCTGCTGGAACTGTGTGGCAGCAAGGCTGTCCTCCAGGAAACCCAGGAGGTTGCCGATGCTGCCCTTCTGCACTGCAATGGCCCGGGCTGCCAGGCTGTCCCCCTGGGCCAGATTTGCCAGCAGTACCACGGCCATCTCCCGGCACAC	chr4	133680493	133680705		1
Inflammation_1	chr4	TXA0459078	ARID1A_t19_2	TCTACATCAACAGTACCCCCTCA	AGCTGGGGCTTGGTGGAT	220	53	TCTACATCAACAGTACCCCCTCACCTTGCCCAGACACCTGTACTCACCTGGCTGAGGTTGAAGGTCATAATGCTGTTGTCATCATACAGTAGAATGTTAATGGTGTCTAACGCCCACGTGCTCTCTGCCAGGAGCCCGGACTTGAGGGACATCATTACCCGCCATGCCTCCGGGGTTCCTGAAATAAACCTCTGTGTTGTCCATCCACCAAGCCCCAGCT	chr4	133684388	133684607		1
Inflammation_1	ARID1A	TXA0459077	ARID1A_t19_1	CCTGCTGTGCCATAGTGTTATCT	GTGGATGGACAACACAGAGGTTT	228	52	CCTGCTGTGCCATAGTGTTATCTACATCAACAGTACCCCCTCACCTTGCCCAGACACCTGTACTCACCTGGCTGAGGTTGAAGGTCATAATGCTGTTGTCATCATACAGTAGAATGTTAATGGTGTCTAACGCCCACGTGCTCTCTGCCAGGAGCCCGGACTTGAGGGACATCATTACCCGCCATGCCTCCGGGGTTCCTGAAATAAACCTCTGTGTTGTCCATCCAC	chr4	133684368	133684595		7
Inflammation_1	chr4	TXA0459076	ARID1A_t20_2	ATCAGTGGTGACACGGAGATG	CAACCTCCTGGGTTTCCTG	222	57	ATCAGTGGTGACACGGAGATGTCCAACAGCCGTGACTCATACAGAGTGAACTCTGAGTGGTTCTCATCCACCTTGGCCAGGGCAAGCAGTGCTCGGGCAGCCCGCCGCATCATGTCCACACTAGTTGGTTCAAAGGGTGGATTCTGCATATGCAGGAGGCTTGCCTGGCTCTGCTGGAACTGTGTGGCAGCAAGGCTGTCCTCCAGGAAACCCAGGAGGTTG	chr4	133680389	133680610		5
Inflammation_1	chr4	TXA0459075	ARID1A_t20_27	ATCAAGGTGTTCTTCCTCTTCTT	GATCTTGGGAACTCCTGTCAA	234	45	ATCAAGGTGTTCTTCCTCTTCTTCCTCTGTATGGGCTGGACTATACACCTTGGTGAATCTCCCAGGGTCTAGTAATGTTCTCTGTCCTGGGTCCCCTACCTCATACTCCTTTAAAATGCCAAAGATTTCAATTAGGCATCTACGGAAATATTCCACAAGGAGCTCTAGCAAGCCTGGGAGCTGAAAGAGAGAAAAAAAGGAAGGGAAGAATTCTTGACAGGAGTTCCCAAGATC	chr4	133681876	133682109		4
Inflammation_1	chr4	TXA0459074	ARID1A_t20_9	ATTGTTGTCCTGGATGCTGAGTT	GGAGATGCTCCGAGAAAACA	235	57	ATTGTTGTCCTGGATGCTGAGTTTGCTGAGGGTTTCCAAGACCAATCTCTGGGGGGAGAGGACGGCATTGGGGCCTAGGGTTGAGAAGGGGTCCTGGGCTTCAGCTGAAGGGCAAACTGCCCAGTGTAGGAGTCCGTCCAGGACAGGCAGGCAGATGCTCTCAGGATATGGGGATAGGTCCAATTGCCCCGAGATGTTGGCGAGGGTGACCAGCGTGTTTTCTCGGAGCATCTCC	chr4	133680796	133681030		4
Inflammation_1	ARID1A	TXA0459073	ARID1A_t20_20	TGTGATCCTTTTCTCTGGAAGGC	TTTGACAGTGGCCTGCTACACT	216	59	TGTGATCCTTTTCTCTGGAAGGCCATCGGGCGGGGGGCCCTCCTGCTCCGTTGTCCCTGGTGTGCCCTCTACTGTTGTGAGGTGTTTCCGAGGGGGCGTTGGGCAGGGCACATAAGGCCGGGAAGGCAGCAGCTCTATCTTGCTCTCAAAGTGGGTCTGGATATGCTCAGTGGTATCCCCACCACCAATCCGCCAGTGTAGCAGGCCACTGTCAAA	chr4	133681465	133681680		1
Inflammation_1	chr4	TXA0459072	ARID1A_t20_15	GATCAGCTTGCCCAGGATA	AGCAAGTTTCCATTTGGCATTAG	237	52	GATCAGCTTGCCCAGGATAAGCAGCAGCCCTGGGTGTTTGGACATCTCAAAGTCGTTGCCTGGCACAAACGACAGGCTCCGGATGGTATTGGAGACACAGACACAGCGCTTAGCAAGGGAATCCTGCCAGTCCAGAAGGGTACACAGTGGGGTCTCATCCTTACTATGGGGTTCATCCTCTAAAATTTTGATGTTCCGGTGGCTCTGTGCTGGGCTAATGCCAAATGGAAACTTGCT	chr4	133681144	133681380		2
Inflammation_1	chr4	TXA0459071	ARID1A_t20_5	GGCTTGCCTGGCTCTG	GCCTGGAGAAGTTGTATAGTACC	216	62	GGCTTGCCTGGCTCTGCTGGAACTGTGTGGCAGCAAGGCTGTCCTCCAGGAAACCCAGGAGGTTGCCGATGCTGCCCTTCTGCACTGCAATGGCCCGGGCTGCCAGGCTGTCCCCCTGGGCCAGATTTGCCAGCAGTACCACGGCCATCTCCCGGCACACTGGGTTCTTTCGGTCACTGAGGAAGCGCACCATGGTACTATACAACTTCTCCAGGC	chr4	133680546	133680761		2
Inflammation_1	ARID1A	TXA0459070	ARID1A_t20_17	ATTTTGATGTTCCGGTGGCTCTG	CCTCACAACAGTAGAGGGCACA	219	56	ATTTTGATGTTCCGGTGGCTCTGTGCTGGGCTAATGCCAAATGGAAACTTGCTGCTTTCCTTGGTGGCCTCTGCACTCTTTGCCCCCTCATCAGTCAATGTGCTAGACCGGGTAGACAACATGTCATCCATGGTGGCTGTGATCCTTTTCTCTGGAAGGCCATCGGGCGGGGGGCCCTCCTGCTCCGTTGTCCCTGGTGTGCCCTCTACTGTTGTGAGG	chr4	133681328	133681546		3
Inflammation_1	chr4	TXA0459069	ARID1A_t20_7	AGATTTGCCAGCAGTACCAC	GGACCCCTTCTCAACCCTA	222	57	AGATTTGCCAGCAGTACCACGGCCATCTCCCGGCACACTGGGTTCTTTCGGTCACTGAGGAAGCGCACCATGGTACTATACAACTTCTCCAGGCGGCTAAAAGGGGGAGTGGCCAGGATCAGGTCCACATTGTTGTCCTGGATGCTGAGTTTGCTGAGGGTTTCCAAGACCAATCTCTGGGGGGAGAGGACGGCATTGGGGCCTAGGGTTGAGAAGGGGTCC	chr4	133680668	133680889		8
Inflammation_1	ARID1A	TXA0459068	ARID1A_t20_24	CTCTGCACGATCTTTACCGGAAG	GGACCCAGGACAGAGAACATTAC	237	48	CTCTGCACGATCTTTACCGGAAGCTTGTCAAACTTACTGACTAGCTTCTCCTCATTATTCTCTGAAGATGGCTTGTCCTTGCCCAAAAAGGCCATCTCCTCATCATTTCCAACCCCTTCTTCCTCTTCCTCCTCCAGTTTAGGATCAAGGTGTTCTTCCTCTTCTTCCTCTGTATGGGCTGGACTATACACCTTGGTGAATCTCCCAGGGTCTAGTAATGTTCTCTGTCCTGGGTCC	chr4	133681733	133681969		1
Inflammation_1	ARID1A	TXA0459067	ARID1A_t20_22	ATCTTGCTCTCAAAGTGGGTCTG	TGATGAGGAGATGGCCTTTTTGG	237	50	ATCTTGCTCTCAAAGTGGGTCTGGATATGCTCAGTGGTATCCCCACCACCAATCCGCCAGTGTAGCAGGCCACTGTCAAACTCCTGCACGCGCCCAAGCTTATCTGAGCAGTCCACCACAAATGGGTCATTCCTCTGCACGATCTTTACCGGAAGCTTGTCAAACTTACTGACTAGCTTCTCCTCATTATTCTCTGAAGATGGCTTGTCCTTGCCCAAAAAGGCCATCTCCTCATCA	chr4	133681601	133681837		8
Inflammation_1	chr4	TXA0459066	ARID1A_t20_13	CGTGTTTTCTCGGAGCATCT	TGTCTGTGTCTCCAATACCATC	238	55	CGTGTTTTCTCGGAGCATCTCCAAGCAGTCCCACCACCACTCCACTTTGTCACAGCTCACCCCTTGGTCCTGTTCCTCCTCCTTCTCATAAGTTAGTGGTGCCTGCTTCCGCTCTGGGTGCTTGTGGTGCAGCAGGATCAGCTTGCCCAGGATAAGCAGCAGCCCTGGGTGTTTGGACATCTCAAAGTCGTTGCCTGGCACAAACGACAGGCTCCGGATGGTATTGGAGACACAGACA	chr4	133681009	133681246		5
Inflammation_1	ARID1A	TXA0459065	ARID1A_t20_1	GGCAACAGTCAGTTTCTAAGTTCT	CGAGCACTGCTTGCCCTG	222	51	GGCAACAGTCAGTTTCTAAGTTCTCCACACACTCACACACACACGGGGAGGGGAGGTGTCCCACGGCTGTCATGACTGGCCAATCAAAAACAGTACATCACAAATGACTTGTGAAACCAATGAGTTCATCAGTGGTGACACGGAGATGTCCAACAGCCGTGACTCATACAGAGTGAACTCTGAGTGGTTCTCATCCACCTTGGCCAGGGCAAGCAGTGCTCG	chr4	133680262	133680483		4
Inflammation_1	chr4	TXA0459064	ARID1A_t20_11	CAGCTGAAGGGCAAACTG	CAGGCACCACTAACTTATGAGA	217	57	CAGCTGAAGGGCAAACTGCCCAGTGTAGGAGTCCGTCCAGGACAGGCAGGCAGATGCTCTCAGGATATGGGGATAGGTCCAATTGCCCCGAGATGTTGGCGAGGGTGACCAGCGTGTTTTCTCGGAGCATCTCCAAGCAGTCCCACCACCACTCCACTTTGTCACAGCTCACCCCTTGGTCCTGTTCCTCCTCCTTCTCATAAGTTAGTGGTGCCTG	chr4	133680897	133681113		6
Inflammation_1	chr11	TXA0458921	RNF43_t9_1	CTCTCTGTGGTCCCTTCCCT	GAGCACACTCGCCATCGAA	185	60	CTCTCTGTGGTCCCTTCCCTGCCACAGCCTCTACAGGTGGGAGAAGCAGGAGATTCGCTGGACCCTCGGTGACCTCTCTTCTCCCCTCTCTTCTCACACAGGCTCGGAAGAGGAGCTGGAGGAGCTGTGCGAGCAGGCTGTGTGACGTGAGCTGGTCAGATGAAGCTTCGATGGCGAGTGTGCTC	chr11	87734055	87734239		8
Inflammation_1	RNF43	TXA0458920	RNF43_t9_2	AGCCTCTACAGGTGGGAGAAG	GAAAGGAGATGCTTGCTGTGGTC	236	61	AGCCTCTACAGGTGGGAGAAGCAGGAGATTCGCTGGACCCTCGGTGACCTCTCTTCTCCCCTCTCTTCTCACACAGGCTCGGAAGAGGAGCTGGAGGAGCTGTGCGAGCAGGCTGTGTGACGTGAGCTGGTCAGATGAAGCTTCGATGGCGAGTGTGCTCCAGATGGCTCAGGGTTCGACCTGGCCCCGGGGTCCCGCTCCTGGGAGGAGCAGGACCACAGCAAGCATCTCCTTTC	chr11	87734080	87734315		4
Inflammation_1	chr11	TXA0458919	RNF43_t8_2	TCTTTACTTGTGAAACTAAATGTCC	TCCTGGAAGGCCCCAA	186	51	TCTTTACTTGTGAAACTAAATGTCCATGTTCTCTATTCTTTTTCCCAGAGGGAGATTCATTTTCCCAGGCCCCGGCAGCCTCTCCATCTTACCAGGAACCAGGCAGAAGACTCCACCTCATTCGCCAGCATCCTGGCCACGCCCACTATCATCTTCCTTCTGCCTATCTGTTGGGGCCTTCCAGGA	chr11	87730979	87731164		5
Inflammation_1	chr11	TXA0458918	RNF43_t8_7	CTCCGATGTACCTCTCAGCAT	TGCCGTGGATGCCCTG	217	62	CTCCGATGTACCTCTCAGCATCCTGCAGCTTGCCCAGTGGCCCTACGACGGGCCAGGCCTCATGAGAGCAGCGGGTCTGGAGAAAGCTACTGTACAGAACGCAGCGGTTACTTGGCAGATGGGCCAGCCAGTGACTCCAGCTCAGGGCCCTGTCACGGCTCATCCAGTGACTCGGTGGTCAACTGCACGGACGTCAGCCTGCAGGGCATCCACGGCA	chr11	87731335	87731551		4
Inflammation_1	chr11	TXA0458917	RNF43_t8_19	GGTTTTCCCCCACTACAGTC	CTCTCCAGGTAAGCATGGTC	190	56	GGTTTTCCCCCACTACAGTCCCCGTCTGGCATACCCTTGGCCCCCAGAGGTTCATCCATTGATGTTCAGACCTCCAGGTCCGGATAGGAGGCTGCTACATGAAGTCCCAGGCCCCTGTTACTCAAGTTCACAGCCAGTGTGGTTGTATCTGAATCCCTGCCAGCCTCTGGGACCATGCTTACCTGGAGAG	chr11	87732114	87732303		1
Inflammation_1	chr11	TXA0458916	RNF43_t8_4	GCCACGCCCACTATCA	CAAGTGCTGCTGTTCTTCTG	176	61	GCCACGCCCACTATCATCTTCCTTCTGCCTATCTGTTGGGGCCTTCCAGGACTTCAGTCGCCCGGACCCCAAGACCTAGACCCTTTCTGCCCTCCCAGGAGCCAAGCATGGGCTCTCGGCATCAGCGCCTTCCCAGGACTTCACATCTCCGGGCCCCAGAAGAACAGCAGCACTTG	chr11	87731114	87731289		3
Inflammation_1	chr11	TXA0458915	RNF43_t8_13	CACCACTACAAAAGGCAGTTCCA	AAGCTTCTGCTAGGCCAGGG	214	58	CACCACTACAAAAGGCAGTTCCAGTGGCATGGCAGGAAGCCTGGCCCAGAAACTGGGATCCCACAGTCCATGCCTGCTGCTTCTCACACTCAGCTGGAGCCATCTCTCCCTGACCAGCAGCTCATCACACCCAACCCAACAGCTTCTTCAATGCTTCCCAACCCACAACGGCCCAGGGCTCTTACAGAGccagcccctggcctagcagaagctt	chr11	87731740	87731953	One primer sits in the repeat region	1
Inflammation_1	chr11	TXA0458914	RNF43_t8_15	CAACAGCTTCTTCAATGCTTCC	CCGCCGTTTTCTGTGTG	173	57	CAACAGCTTCTTCAATGCTTCCCAACCCACAACGGCCCAGGGCTCTTACAGAGccagcccctggcctagcagaagcttccagccctagccccagtcccaaacctaaccccagcGGTCTTTTGAACTTGCAGAAATCCAGCCTCACTGTCAGACACCCACACAGAAAACGGCGG	chr11	87731876	87732048		7
Inflammation_1	chr11	TXA0458913	RNF43_t8_17	GCAGAAATCCAGCCTCACTGTC	CTGGAGGTCTGAACATCAATGG	188	60	GCAGAAATCCAGCCTCACTGTCAGACACCCACACAGAAAACGGCGGGGTGGTCCCTCAGAACCCCTGCCAACCTCTCTGCCCCCGGACTTGACTGTGCACACTGCTTGCCCGGTTTTCCCCCACTACAGTCCCCGTCTGGCATACCCTTGGCCCCCAGAGGTTCATCCATTGATGTTCAGACCTCCAG	chr11	87732003	87732190		6
Inflammation_1	chr11	TXA0458912	RNF43_t8_5	TAGACCCTTTCTGCCCTCC	TAGGGCCACTGGGCAA	190	62	TAGACCCTTTCTGCCCTCCCAGGAGCCAAGCATGGGCTCTCGGCATCAGCGCCTTCCCAGGACTTCACATCTCCGGGCCCCAGAAGAACAGCAGCACTTGGCGGTATCTCCACACCCCTATGCACAGGGCTGGGGGCTGAATCGCCTCCGATGTACCTCTCAGCATCCTGCAGCTTGCCCAGTGGCCCTA	chr11	87731190	87731379		1
Inflammation_1	chr11	TXA0458911	RNF43_t8_21	ACAGCCAGTGTGGTTGTAT	CTGTTTTCACCTGCCTTCCAAT	216	54	ACAGCCAGTGTGGTTGTATCTGAATCCCTGCCAGCCTCTGGGACCATGCTTACCTGGAGAGGGACATTCCAAGTGGACTTTTGACAGCCCAGAGGGCAGGAGATGTCCTTACTCACATTGCCAGGTGCTGCCAGCCCAACCTGGTGAGTGTTCAGGGAAGCAGGTGTTCTGGGAAGAGGAGACTCTGTCTGGATATTGGAAGGCAGGTGAAAACAG	chr11	87732243	87732458		7
Inflammation_1	chr11	TXA0458910	RNF43_t8_11	TATACTGTAGTCCTGAAGGGGAT	AGGCTTCCTGCCATGC	182	57	TATACTGTAGTCCTGAAGGGGATCTCCAAGGGAAAGGGATACAACCTAGTGTGACCTCTCGACCCCGCTCGCTGGACTCAGTGGTACCCAGGGGAGAGACCCAGGTTTCCAGCCACATACACTATCACCGGCACCGCCACCACCACTACAAAAGGCAGTTCCAGTGGCATGGCAGGAAGCCT	chr11	87731600	87731781		3
Inflammation_1	chr11	TXA0458909	RNF43_t8_9	AGATGGGCCAGCCAGT	GGGTCGAGAGGTCACACTA	214	59	AGATGGGCCAGCCAGTGACTCCAGCTCAGGGCCCTGTCACGGCTCATCCAGTGACTCGGTGGTCAACTGCACGGACGTCAGCCTGCAGGGCATCCACGGCAGCAGCTCCACCTTCCGAAGCTCCCTGAGCAGTGACTTTGACCCCTTGGTATACTGTAGTCCTGAAGGGGATCTCCAAGGGAAAGGGATACAACCTAGTGTGACCTCTCGACCC	chr11	87731451	87731664		7
Inflammation_1	RNF43	TXA0458908	RNF43_t8_18	CCTCAGAACCCCTGCCAAC	AGGGATTCAGATACAACCACACT	216	57	CCTCAGAACCCCTGCCAACCTCTCTGCCCCCGGACTTGACTGTGCACACTGCTTGCCCGGTTTTCCCCCACTACAGTCCCCGTCTGGCATACCCTTGGCCCCCAGAGGTTCATCCATTGATGTTCAGACCTCCAGGTCCGGATAGGAGGCTGCTACATGAAGTCCCAGGCCCCTGTTACTCAAGTTCACAGCCAGTGTGGTTGTATCTGAATCCCT	chr11	87732056	87732271		5
Inflammation_1	chr11	TXA0458907	RNF43_t8_10	CAGTGACTCGGTGGTCAA	GTGATAGTGTATGTGGCTGGAAA	229	58	CAGTGACTCGGTGGTCAACTGCACGGACGTCAGCCTGCAGGGCATCCACGGCAGCAGCTCCACCTTCCGAAGCTCCCTGAGCAGTGACTTTGACCCCTTGGTATACTGTAGTCCTGAAGGGGATCTCCAAGGGAAAGGGATACAACCTAGTGTGACCTCTCGACCCCGCTCGCTGGACTCAGTGGTACCCAGGGGAGAGACCCAGGTTTCCAGCCACATACACTATCAC	chr11	87731499	87731727		5
Inflammation_1	RNF43	TXA0458906	RNF43_t8_12	CTCCAAGGGAAAGGGATACAACC	CTGCTGGTCAGGGAGAGATGG	237	59	CTCCAAGGGAAAGGGATACAACCTAGTGTGACCTCTCGACCCCGCTCGCTGGACTCAGTGGTACCCAGGGGAGAGACCCAGGTTTCCAGCCACATACACTATCACCGGCACCGCCACCACCACTACAAAAGGCAGTTCCAGTGGCATGGCAGGAAGCCTGGCCCAGAAACTGGGATCCCACAGTCCATGCCTGCTGCTTCTCACACTCAGCTGGAGCCATCTCTCCCTGACCAGCAG	chr11	87731623	87731859		2
Inflammation_1	RNF43	TXA0458905	RNF43_t8_16	ACGGCCCAGGGCTCTTA	AGACGGGGACTGTAGTGGG	234	61	ACGGCCCAGGGCTCTTACAGAGccagcccctggcctagcagaagcttccagccctagccccagtcccaaacctaaccccagcGGTCTTTTGAACTTGCAGAAATCCAGCCTCACTGTCAGACACCCACACAGAAAACGGCGGGGTGGTCCCTCAGAACCCCTGCCAACCTCTCTGCCCCCGGACTTGACTGTGCACACTGCTTGCCCGGTTTTCCCCCACTACAGTCCCCGTCT	chr11	87731907	87732140		4
Inflammation_1	RNF43	TXA0458904	RNF43_t8_6	CTTCCCAGGACTTCACATCTCC	CTGGCCCATCTGCCAAGTAA	220	61	CTTCCCAGGACTTCACATCTCCGGGCCCCAGAAGAACAGCAGCACTTGGCGGTATCTCCACACCCCTATGCACAGGGCTGGGGGCTGAATCGCCTCCGATGTACCTCTCAGCATCCTGCAGCTTGCCCAGTGGCCCTACGACGGGCCAGGCCTCATGAGAGCAGCGGGTCTGGAGAAAGCTACTGTACAGAACGCAGCGGTTACTTGGCAGATGGGCCAG	chr11	87731242	87731461		8
Inflammation_1	chr11	TXA0458903	RNF43_t8_20	CGGATAGGAGGCTGCTACAT	GTCTCCTCTTCCCAGAACAC	232	56	CGGATAGGAGGCTGCTACATGAAGTCCCAGGCCCCTGTTACTCAAGTTCACAGCCAGTGTGGTTGTATCTGAATCCCTGCCAGCCTCTGGGACCATGCTTACCTGGAGAGGGACATTCCAAGTGGACTTTTGACAGCCCAGAGGGCAGGAGATGTCCTTACTCACATTGCCAGGTGCTGCCAGCCCAACCTGGTGAGTGTTCAGGGAAGCAGGTGTTCTGGGAAGAGGAGAC	chr11	87732194	87732425		3
Inflammation_1	RNF43	TXA0458902	RNF43_t8_8	ATGAGAGCAGCGGGTCTGG	TTGGAGATCCCCTTCAGGACTAC	233	59	ATGAGAGCAGCGGGTCTGGAGAAAGCTACTGTACAGAACGCAGCGGTTACTTGGCAGATGGGCCAGCCAGTGACTCCAGCTCAGGGCCCTGTCACGGCTCATCCAGTGACTCGGTGGTCAACTGCACGGACGTCAGCCTGCAGGGCATCCACGGCAGCAGCTCCACCTTCCGAAGCTCCCTGAGCAGTGACTTTGACCCCTTGGTATACTGTAGTCCTGAAGGGGATCTCCAA	chr11	87731396	87731628		6
Inflammation_1	RNF43	TXA0458901	RNF43_t8_1	TCTCTGTATGAAGTCTTTACTTGTGA	GCAGAAAGGGTCTAGGTCTTGG	238	52	TCTCTGTATGAAGTCTTTACTTGTGAAACTAAATGTCCATGTTCTCTATTCTTTTTCCCAGAGGGAGATTCATTTTCCCAGGCCCCGGCAGCCTCTCCATCTTACCAGGAACCAGGCAGAAGACTCCACCTCATTCGCCAGCATCCTGGCCACGCCCACTATCATCTTCCTTCTGCCTATCTGTTGGGGCCTTCCAGGACTTCAGTCGCCCGGACCCCAAGACCTAGACCCTTTCTGC	chr11	87730966	87731203		8
Inflammation_1	RNF43	TXA0458900	RNF43_t8_14	GGATCCCACAGTCCATGCC	GGCTGGATTTCTGCAAGTTC	222	58	GGATCCCACAGTCCATGCCTGCTGCTTCTCACACTCAGCTGGAGCCATCTCTCCCTGACCAGCAGCTCATCACACCCAACCCAACAGCTTCTTCAATGCTTCCCAACCCACAACGGCCCAGGGCTCTTACAGAGccagcccctggcctagcagaagcttccagccctagccccagtcccaaacctaaccccagcGGTCTTTTGAACTTGCAGAAATCCAGCC	chr11	87731795	87732016		8
Inflammation_1	RNF43	TXA0458899	RNF43_t8_3	GGCAGAAGACTCCACCTCATTC	CTGTGCATAGGGGTGTGGAGATA	237	60	GGCAGAAGACTCCACCTCATTCGCCAGCATCCTGGCCACGCCCACTATCATCTTCCTTCTGCCTATCTGTTGGGGCCTTCCAGGACTTCAGTCGCCCGGACCCCAAGACCTAGACCCTTTCTGCCCTCCCAGGAGCCAAGCATGGGCTCTCGGCATCAGCGCCTTCCCAGGACTTCACATCTCCGGGCCCCAGAAGAACAGCAGCACTTGGCGGTATCTCCACACCCCTATGCACAG	chr11	87731080	87731316		2
Inflammation_1	chr11	TXA0458898	RNF43_t7_1	CAAGAGGGAGCTAGGGAGGT	CAGGAGAGCCCTTGAGTTCAC	190	56	CAAGAGGGAGCTAGGGAGGTCCTTGTAACCTTTGGTTGGGGCACTCTTGTCTGCTTCAGGAGCTCCGGGTCATTTCGTGCCTCCACGAGTTTCATCGAACGTGTGTGGACCCCTGGCTATACCAGCATCGGACTTGCCCCCTCTGCATGTTCAACATCGTAGGTAGGAGGTGAACTCAAGGGCTCTCCTG	chr11	87730073	87730262		4
Inflammation_1	RNF43	TXA0458897	RNF43_t7_2	GCTAGGGAGGTCCTTGTAACCTT	TCACAAGAGAAACCCTTTCCCAC	240	55	GCTAGGGAGGTCCTTGTAACCTTTGGTTGGGGCACTCTTGTCTGCTTCAGGAGCTCCGGGTCATTTCGTGCCTCCACGAGTTTCATCGAACGTGTGTGGACCCCTGGCTATACCAGCATCGGACTTGCCCCCTCTGCATGTTCAACATCGTAGGTAGGAGGTGAACTCAAGGGCTCTCCTGTGTGCGTACAGATGGATGTAGGACATAGCTGCCCCAGTGGGAAAGGGTTTCTCTTGTGA	chr11	87730082	87730321		6
Inflammation_1	chr11	TXA0458896	RNF43_t6_2	CAGGAGCGAGGAAAGCAGAG	ACCTGCCCCTCTGAGAACT	220	63	CAGGAGCGAGGAAAGCAGAGCTCTCACTTCAGTGTGAACTCCATCCCTGTCCCCAGGATCCTCTTCAGCAGCGGACAGCCCGGGCCATCAGCCAGCTGGCCACCAGGAGGTACCAAGCCGGCTGTAGACGAGCCCGAGCCGAGTGGCCAGACTCGGGGAGTAGCTGCAGCTCGACCCCCGTGTGTGCCATCTGTCTAGAAGAGTTCTCAGAGGGGCAGGT	chr11	87729344	87729563		2
Inflammation_1	chr11	TXA0458895	RNF43_t6_4	CTGTAGACGAGCCCGAG	GTTGTGACGTAGTCATACCTAGA	173	63	CTGTAGACGAGCCCGAGCCGAGTGGCCAGACTCGGGGAGTAGCTGCAGCTCGACCCCCGTGTGTGCCATCTGTCTAGAAGAGTTCTCAGAGGGGCAGGTGAGATGGGCCCGGCTGGAGATGGGGAGGGTACCTGGGGCGGGGTGGAGAGGTCTAGGTATGACTACGTCACAAC	chr11	87729465	87729637		3
Inflammation_1	RNF43	TXA0458894	RNF43_t6_3	CCACCAGGAGGTACCAAGC	TTGGAGGACACATAGACCCAGAT	221	62	CCACCAGGAGGTACCAAGCCGGCTGTAGACGAGCCCGAGCCGAGTGGCCAGACTCGGGGAGTAGCTGCAGCTCGACCCCCGTGTGTGCCATCTGTCTAGAAGAGTTCTCAGAGGGGCAGGTGAGATGGGCCCGGCTGGAGATGGGGAGGGTACCTGGGGCGGGGTGGAGAGGTCTAGGTATGACTACGTCACAACTACATCTGGGTCTATGTGTCCTCCAA	chr11	87729443	87729663		1
Inflammation_1	RNF43	TXA0458893	RNF43_t6_1	CAAGGGCATTCGGAACTGAGG	TCTAGACAGATGGCACACACG	233	64	CAAGGGCATTCGGAACTGAGGCGTGGCTGGGGCCCAGGAGCGAGGAAAGCAGAGCTCTCACTTCAGTGTGAACTCCATCCCTGTCCCCAGGATCCTCTTCAGCAGCGGACAGCCCGGGCCATCAGCCAGCTGGCCACCAGGAGGTACCAAGCCGGCTGTAGACGAGCCCGAGCCGAGTGGCCAGACTCGGGGAGTAGCTGCAGCTCGACCCCCGTGTGTGCCATCTGTCTAGA	chr11	87729310	87729542		5
Inflammation_1	chr11	TXA0458892	RNF43_t5_2	GGCTCTTTCTAGAGTATGACCCTT	ACTTCTATTAGGCAGCCCACACT	190	56	GGCTCTTTCTAGAGTATGACCCTTTTCTTCTCTGCTTCCCCCACCCACATCTCCAGGCAAACTATGACGTGTGGATCCTCCTGACCGTGGTGGGTACCGTCTTTGTGATCATCCTGGCCTCAGTGCTGCGCATCAGGTGCCGCCCCCACCATAGCAGACCGGTGAGCAGTGTGGGCTGCCTAATAGAAGT	chr11	87727970	87728159		8
Inflammation_1	RNF43	TXA0458891	RNF43_t5_1	CTTTCCTTTCCCTCCTGACTTGG	CCTCCACGTTTATACCCATACCC	239	55	CTTTCCTTTCCCTCCTGACTTGGTCTGGCTCTTTCTAGAGTATGACCCTTTTCTTCTCTGCTTCCCCCACCCACATCTCCAGGCAAACTATGACGTGTGGATCCTCCTGACCGTGGTGGGTACCGTCTTTGTGATCATCCTGGCCTCAGTGCTGCGCATCAGGTGCCGCCCCCACCATAGCAGACCGGTGAGCAGTGTGGGCTGCCTAATAGAAGTGGGTATGGGTATAAACGTGGAGG	chr11	87727944	87728182		7
Inflammation_1	RNF43	TXA0458888	RNF43_t4_2	GAGCTGGTAGCAGAAGTCAAACA	TCTGTTGGATAAAGTGGAAGTGGG	240	57	GAGCTGGTAGCAGAAGTCAAACAGCCCTGCTGGGGCTTTGTTCTCTGCAGCTGCAGCAGCCCCTGGGGCTGACTAAGCCAGTGGTGCTGATCTGGGGTAGTGATGCTGCGAAGCTGATGGAGTTTGTGTACAAGAATCGGAAGGCCTATGTGTGGATTGAGCTGAAGGAGCCCCCCGCCGGGGTAAGCGTCTCAGGCCTCAGCCTTGGGTCTGCAGCCCACTTCCACTTTATCCAACAGA	chr11	87727286	87727525		4
Inflammation_1	chr11	TXA0458887	RNF43_t3_2	TGAATGTGTGAGCACCCGAG	AGACCCCTCTCCTGGAACAC	186	60	TGAATGTGTGAGCACCCGAGGTTGAGAGCCAGCCGTGGTCAGGGTGGGACGAGCCTCTGCTCTGTTTCCACAGGCCCGAATGGCTGGTGAGCGAGGAGCCAACGCAGTACTCTTTGACATCACCGAGGATCGATCAGCTGCTGAGCAGGTGCCTAGGGACACGAGGGTGTTCCAGGAGAGGGGTCT	chr11	87727077	87727262		1
Inflammation_1	RNF43	TXA0458886	RNF43_t3_1	AGGGAGAGATGAATGTGTGAGCA	ACTTCTGCTACCAGCTCAAGAAC	235	59	AGGGAGAGATGAATGTGTGAGCACCCGAGGTTGAGAGCCAGCCGTGGTCAGGGTGGGACGAGCCTCTGCTCTGTTTCCACAGGCCCGAATGGCTGGTGAGCGAGGAGCCAACGCAGTACTCTTTGACATCACCGAGGATCGATCAGCTGCTGAGCAGGTGCCTAGGGACACGAGGGTGTTCCAGGAGAGGGGTCTGGATGGAGGAAGGTTGGGTTCTTGAGCTGGTAGCAGAAGT	chr11	87727068	87727302		6
Inflammation_1	chr11	TXA0458885	RNF43_t1_2	TAGTAGAAGCGGTATGCATGG	TTCAAGGGGATCACTCTGATAA	209	58	TAGTAGAAGCGGTATGCATGGCCGAAGAGCATTGATGCAGCTGGTAGCATGAGTGGTGGCCACCAGCTGCAGCTGGCTGTCCTCTGGCCCTGGCTGCTGATGGCAACCCTGCACGCAGGCTTCGGACACACAGGACGGGTGCTGGCGGCGGCAGTGGAGTCCGAAAGATCAGCAGAACAGAAAGCTGTTATCAGAGTGATCCCCTTGAA	chr11	87664568	87664776		1
Inflammation_1	chr11	TXA0458884	RNF43_t1_4	GGCAGTGGAGTCCGAAAG	AGGTAAAACAGAACCGCATTCTA	179	49	GGCAGTGGAGTCCGAAAGATCAGCAGAACAGAAAGCTGTTATCAGAGTGATCCCCTTGAAAATGGACCCCACAGGAAAACTGAACCTCACTTTGGAAGGCGTGTTTGCTGGTGTTGCAGAAGTGACTCCAGCAGAAGGGAAGCTAATGCAGGCAAGTAGAATGCGGTTCTGTTTTACCT	chr11	87664717	87664895		5
Inflammation_1	chr11	TXA0458883	RNF43_t2_3	CCCCTGTACCTGTGCAACG	cccTGTGGGCTTATCATTCTTGA	216	60	CCCCTGTACCTGTGCAACGCCAGTGATGACGACAACCTTGAGCCTGGGTTCATCAGCATCGTCAAGCTGGAGAGCCCTCGACGAGCTCCTCGCCCCTGCCTGTCACTGGCCAGTAAGGTAGGGCCTCACGCCACACTCCTCTGCTGCATCCAGCATGGGCCATGAGCACCCCCAGCTCTCGAGTTCCCTTGTCTCAAGAATGATAAGCCCACAggg	chr11	87718384	87718599	One primer sits in the repeat region	8
Inflammation_1	chr11	TXA0458882	RNF43_t2_2	ACCCAGATGTCTGTCTGTCTCTC	CGTGAGGCCCTACCTTACTGG	164	60	ACCCAGATGTCTGTCTGTCTCTCTGCAGTCCCACCCCCTGTACCTGTGCAACGCCAGTGATGACGACAACCTTGAGCCTGGGTTCATCAGCATCGTCAAGCTGGAGAGCCCTCGACGAGCTCCTCGCCCCTGCCTGTCACTGGCCAGTAAGGTAGGGCCTCACG	chr11	87718350	87718513		7
Inflammation_1	RNF43	TXA0458881	RNF43_t2_1	AGCTGTGCTTGATTCTTGTCCAT	CTGGATGCAGCAGAGGAGTG	240	58	AGCTGTGCTTGATTCTTGTCCATGGCTCACAGCTGCCTGCTAGAGTTTGTCTAACCCAGATGTCTGTCTGTCTCTCTGCAGTCCCACCCCCTGTACCTGTGCAACGCCAGTGATGACGACAACCTTGAGCCTGGGTTCATCAGCATCGTCAAGCTGGAGAGCCCTCGACGAGCTCCTCGCCCCTGCCTGTCACTGGCCAGTAAGGTAGGGCCTCACGCCACACTCCTCTGCTGCATCCAG	chr11	87718297	87718536		6
Inflammation_1	RNF43	TXA0458880	RNF43_t1_1	ATGAGCTGGTAGTAGAAGCGGTA	TTTTCCTGTGGGGTCCATTTTCA	237	57	ATGAGCTGGTAGTAGAAGCGGTATGCATGGCCGAAGAGCATTGATGCAGCTGGTAGCATGAGTGGTGGCCACCAGCTGCAGCTGGCTGTCCTCTGGCCCTGGCTGCTGATGGCAACCCTGCACGCAGGCTTCGGACACACAGGACGGGTGCTGGCGGCGGCAGTGGAGTCCGAAAGATCAGCAGAACAGAAAGCTGTTATCAGAGTGATCCCCTTGAAAATGGACCCCACAGGAAAA	chr11	87664559	87664795		4
Inflammation_1	RNF43	TXA0458879	RNF43_t1_3	GGCTTCGGACACACAGGAC	GCATCTTTCAAGCAGACAGAAGG	231	52	GGCTTCGGACACACAGGACGGGTGCTGGCGGCGGCAGTGGAGTCCGAAAGATCAGCAGAACAGAAAGCTGTTATCAGAGTGATCCCCTTGAAAATGGACCCCACAGGAAAACTGAACCTCACTTTGGAAGGCGTGTTTGCTGGTGTTGCAGAAGTGACTCCAGCAGAAGGGAAGCTAATGCAGGCAAGTAGAATGCGGTTCTGTTTTACCTTCTGTCTGCTTGAAAGATGC	chr11	87664685	87664915		6
Inflammation_1	chr1	TXA0458878	IDH1_t1_2	TGAGTTTGCTAGCTACAGAGAAG	GTCCAGAAAAATCCAAGGAGGTTC	161	38	TGAGTTTGCTAGCTACAGAGAAGAACAATTAATTTATTTACCTATGCAGATCCAGTTCCACATAGGGAAGAATAAGTTTTTCCTTAATCAATTCCCAAATGATTCGTGTCATTTCATCTCCTTGCATCTCCACCACAGAACCTCCTTGGATTTTTCTGGAC	chr1	65175190	65175350		2
Inflammation_1	chr1	TXA0458877	IDH1_t1_4	CCAGTTCCACATAGGGAAGAATA	TATAACGTGACAAGGTACAAACC	180	34	CCAGTTCCACATAGGGAAGAATAAGTTTTTCCTTAATCAATTCCCAAATGATTCGTGTCATTTCATCTCCTTGCATCTCCACCACAGAACCTCCTTGGATTTTTCTGGACATTTTTACTTCAATAACCCTAATTTAAAAAAAAAAAAAGAAAGAAAAGGTTTGTACCTTGTCACGTTATA	chr1	65175241	65175420		3
Inflammation_1	chr1	TXA0458876	IDH1_t2_2	ATTGGAGCTAAAGGTCTGTGAAA	CACTGTCTTCAGGGAAGCTAT	168	42	ATTGGAGCTAAAGGTCTGTGAAAAATAAATACGGAAAAAATCAAATTATGCTCACTCAAATGACTTACTTGGTCCCCATATGCATGTCGGCCAATGATGATGGGTTTTACCCAGCCTGTCACTAGCCGGGGGATATTTTTGCAGATAATAGCTTCCCTGAAGACAGTG	chr1	65170891	65171058		1
Inflammation_1	chr1	TXA0458875	IDH1_t2_3	TATGCATGTCGGCCAATGA	CGATGAGAAGAGGGTTGAAGAAT	171	46	TATGCATGTCGGCCAATGATGATGGGTTTTACCCAGCCTGTCACTAGCCGGGGGATATTTTTGCAGATAATAGCTTCCCTGAAGACAGTGCCACCCAGAATGTTTCGGATGGTGCCATTTGGGGATTTCCACATTTGTTTCAACTTGAATTCTTCAACCCTCTTCTCATCG	chr1	65170969	65171139		8
Inflammation_1	chr1	TXA0458874	IDH1_t2_6	TGGGGATTTCCACATTTGTTTCA	TTGCCCTGACATCTCTCCTTCT	190	46	TGGGGATTTCCACATTTGTTTCAACTTGAATTCTTCAACCCTCTTCTCATCGGGGGTGATGGTAGCACACTTGACGCCCACGTTGTATTTCTTTATAGCCTCTGCAGCATCTTTGGTGACCTGGTCATTGGTGGCATCACGATTCTCTATGCCTAAATCATAGCTTGGAGAAGGAGAGATGTCAGGGCAA	chr1	65171088	65171277		7
Inflammation_1	IDH1	TXA0458873	IDH1_t1_1	aCAATGCCAGGTACAATTTGAGATA	GGGTTATTGAAGTAAAAATGTCCAGA	216	36	aCAATGCCAGGTACAATTTGAGATAACAATTGTTTCTGAGTTTGCTAGCTACAGAGAAGAACAATTAATTTATTTACCTATGCAGATCCAGTTCCACATAGGGAAGAATAAGTTTTTCCTTAATCAATTCCCAAATGATTCGTGTCATTTCATCTCCTTGCATCTCCACCACAGAACCTCCTTGGATTTTTCTGGACATTTTTACTTCAATAACCC	chr1	65175154	65175369	One primer sits in the repeat region	5
Inflammation_1	chr1	TXA0458872	IDH1_t1_3	TATGCAGATCCAGTTCCACATAG	TGTTCTTTTTTAATAGTCACCAATTC	236	32	TATGCAGATCCAGTTCCACATAGGGAAGAATAAGTTTTTCCTTAATCAATTCCCAAATGATTCGTGTCATTTCATCTCCTTGCATCTCCACCACAGAACCTCCTTGGATTTTTCTGGACATTTTTACTTCAATAACCCTAATTTAAAAAAAAAAAAAGAAAGAAAAGGTTTGTACCTTGTCACGTTATAAAGTAGAAACAATGTATCAATGAATTGGTGACTATTAAAAAAGAACA	chr1	65175232	65175467		6
Inflammation_1	chr1	TXA0458871	IDH1_t2_4	GGCCAATGATGATGGGTTTTA	ATGCTGCAGAGGCTATAAAGAAA	219	47	GGCCAATGATGATGGGTTTTACCCAGCCTGTCACTAGCCGGGGGATATTTTTGCAGATAATAGCTTCCCTGAAGACAGTGCCACCCAGAATGTTTCGGATGGTGCCATTTGGGGATTTCCACATTTGTTTCAACTTGAATTCTTCAACCCTCTTCTCATCGGGGGTGATGGTAGCACACTTGACGCCCACGTTGTATTTCTTTATAGCCTCTGCAGCAT	chr1	65170979	65171197		5
Inflammation_1	IDH1	TXA0458870	IDH1_t2_1	AAGGGTGTAGATGCCCAAAGAAC	CAAATGGCACCATCCGAAACATT	232	43	AAGGGTGTAGATGCCCAAAGAACAAACATAGATATTGGAGCTAAAGGTCTGTGAAAAATAAATACGGAAAAAATCAAATTATGCTCACTCAAATGACTTACTTGGTCCCCATATGCATGTCGGCCAATGATGATGGGTTTTACCCAGCCTGTCACTAGCCGGGGGATATTTTTGCAGATAATAGCTTCCCTGAAGACAGTGCCACCCAGAATGTTTCGGATGGTGCCATTTG	chr1	65170858	65171089		6
Inflammation_1	IDH1	TXA0458869	IDH1_t2_5	GAATGTTTCGGATGGTGCCATTT	GTTGCAGCCTGTCAGTTTGTCTC	240	48	GAATGTTTCGGATGGTGCCATTTGGGGATTTCCACATTTGTTTCAACTTGAATTCTTCAACCCTCTTCTCATCGGGGGTGATGGTAGCACACTTGACGCCCACGTTGTATTTCTTTATAGCCTCTGCAGCATCTTTGGTGACCTGGTCATTGGTGGCATCACGATTCTCTATGCCTAAATCATAGCTTGGAGAAGGAGAGATGTCAGGGCAACCGTGGAGACAAACTGACAGGCTGCAAC	chr1	65171066	65171305		2
Inflammation_1	chr1	TXA0458868	IDH1_t3_2	GTAGCCCAAGGCATCTGT	TTCCTAATGTATGTTCCCCTCTT	185	45	GTAGCCCAAGGCATCTGTACAGTGACATGAAGCAGGGCAGACTGCACCTACCTTCAAAGTCATGTACCATGTATGTCACCTTCTGAGTTCCATCTTTTGGTGTGTAGGTTATCTCTACTTTTCCAGGCCCAGGAACAACAAAATCAGTTGCTCTGTACTGTAAAGAGGGGAACATACATTAGGAA	chr1	65168448	65168632		4
Inflammation_1	chr1	TXA0458867	IDH1_t4_3	TGAAACGCCCATCATACTTCTTCA	CCTTTCTCCTCTTTGTCCTTGGT	189	48	TGAAACGCCCATCATACTTCTTCAGAATAGTGTTCTTGGTGCTGAGATACAAAGGCCAGCCCTTGGACAGAGCCATTTGGAAGGAACTGTGTGCAAAGTCTTCAATTGACTTATCCTGGTTGTACATGCCCATGGCAACACCACCACCTTCTGTGGAGAGGAGGTCACCAAGGACAAAGAGGAGAAAGG	chr1	65166135	65166323		2
Inflammation_1	chr1	TXA0458866	IDH1_t4_2	TGCCTGCAATTCTTACTTGAAAAC	CACAGTTCCTTCCAAATGGCTCT	170	44	TGCCTGCAATTCTTACTTGAAAACAGAAAAGGGAGTAAGGGCCATAGTTACTTGTCATAGATCTCCTGGAAGATGTCTTTGAAACGCCCATCATACTTCTTCAGAATAGTGTTCTTGGTGCTGAGATACAAAGGCCAGCCCTTGGACAGAGCCATTTGGAAGGAACTGTG	chr1	65166056	65166225		6
Inflammation_1	IDH1	TXA0458865	IDH1_t3_1	TGTAACAAAGTAGCCCAAGGCAT	TTACCCCTTACAGTTTCTGGTGG	224	44	TGTAACAAAGTAGCCCAAGGCATCTGTACAGTGACATGAAGCAGGGCAGACTGCACCTACCTTCAAAGTCATGTACCATGTATGTCACCTTCTGAGTTCCATCTTTTGGTGTGTAGGTTATCTCTACTTTTCCAGGCCCAGGAACAACAAAATCAGTTGCTCTGTACTGTAAAGAGGGGAACATACATTAGGAAAAGTACCCCACCAGAAACTGTAAGGGGTAA	chr1	65168439	65168662		3
Inflammation_1	IDH1	TXA0458864	IDH1_t4_1	GGCTACATCCTAAATGCCTGCAA	CATGGGCATGTACAACCAGGATA	227	44	GGCTACATCCTAAATGCCTGCAATTCTTACTTGAAAACAGAAAAGGGAGTAAGGGCCATAGTTACTTGTCATAGATCTCCTGGAAGATGTCTTTGAAACGCCCATCATACTTCTTCAGAATAGTGTTCTTGGTGCTGAGATACAAAGGCCAGCCCTTGGACAGAGCCATTTGGAAGGAACTGTGTGCAAAGTCTTCAATTGACTTATCCTGGTTGTACATGCCCATG	chr1	65166042	65166268		7
Inflammation_1	IDH1	TXA0458863	IDH1_t4_4	TCAGAATAGTGTTCTTGGTGCTG	GCAGCTGAGAAATTGGTCCTTG	240	45	TCAGAATAGTGTTCTTGGTGCTGAGATACAAAGGCCAGCCCTTGGACAGAGCCATTTGGAAGGAACTGTGTGCAAAGTCTTCAATTGACTTATCCTGGTTGTACATGCCCATGGCAACACCACCACCTTCTGTGGAGAGGAGGTCACCAAGGACAAAGAGGAGAAAGGTAAGGAGGATGGTATTTATAGCAAGACTAAAACCATGTATAATAAAGACCCAAGGACCAATTTCTCAGCTGC	chr1	65166156	65166395		8
Inflammation_1	chr1	TXA0458862	IDH1_t5_3	CAGGCCCAGATGAAGCC	TTTTGGAGAGTTGCAAATGGTATC	190	41	CAGGCCCAGATGAAGCCTCCCTCGGACTTCATAGCTTGGGCCACCATGTCATCTATGAGCCTGTGTTCATAGCAGATCTTCTGAGCTTCAAACTGGGACTTGTATTTCCTAAAACAAGCAAACGAACAAGAGAAAACAAGAATAAAATAGAATTAGTTTTATCAGAGATACCATTTGCAACTCTCCAAAA	chr1	65165144	65165333		5
Inflammation_1	chr1	TXA0458861	IDH1_t5_1	CAGAGCCCTTTGTGGAATATCCT	CAGGCTCATAGATGACATGGTGG	189	52	CAGAGCCCTTTGTGGAATATCCTCGCTGCCAGCCGGCATGTGCTTCCTCTAAGTAGTCCTCTGGCCATTTGTTTATATTTACCTTGGGCGACTGAGTCTGACTGCACATCCCCATCGTAATTCTTACAGGCCCAGATGAAGCCTCCCTCGGACTTCATAGCTTGGGCCACCATGTCATCTATGAGCCTG	chr1	65165018	65165206		3
Inflammation_1	IDH1	TXA0458860	IDH1_t5_2	GGCATGTGCTTCCTCTAAGTAGT	TGTTTTCTCTTGTTCGTTTGCTTG	230	46	GGCATGTGCTTCCTCTAAGTAGTCCTCTGGCCATTTGTTTATATTTACCTTGGGCGACTGAGTCTGACTGCACATCCCCATCGTAATTCTTACAGGCCCAGATGAAGCCTCCCTCGGACTTCATAGCTTGGGCCACCATGTCATCTATGAGCCTGTGTTCATAGCAGATCTTCTGAGCTTCAAACTGGGACTTGTATTTCCTAAAACAAGCAAACGAACAAGAGAAAACA	chr1	65165052	65165281		1
Inflammation_1	chr1	TXA0458859	IDH1_t6_3	TACATGCGGTAGTGACGTGT	GTCAACATCAAGTCGCTTACTCT	190	51	TACATGCGGTAGTGACGTGTGACAGTGCCATGGGCAGCCTCTGCTTCTACCGTCTTACCATCTGGACAAATCAGCACACTGGTCATCATGCCAAGGGAGCCATAACCTATAAGTGCAGAGCATGAAGTGTTGGGTCCAACTGCATGAACAGCCCTGCTCTAGAGATGAGAGTAAGCGACTTGATGTTGAC	chr1	65161835	65162024		4
Inflammation_1	chr1	TXA0458858	IDH1_t6_1	AGTCTATGAGGAGCAAAGGTACG	TGGTAAGACGGTAGAAGCAGAGG	190	49	AGTCTATGAGGAGCAAAGGTACGCGTCTCAGTTCCTTTGAGATTGGCTTTGAAGAGTTCTCTGGCTGGAAATCAGTAAAGTAGATACTATCTTACCAATGGGGTTGGTGGACGTCTCTTGCCCTTTCTGGTACATGCGGTAGTGACGTGTGACAGTGCCATGGGCAGCCTCTGCTTCTACCGTCTTACCA	chr1	65161705	65161894		3
Inflammation_1	IDH1	TXA0458857	IDH1_t6_2	GTCTCAGTTCCTTTGAGATTGGC	CCAACACTTCATGCTCTGCACT	239	49	GTCTCAGTTCCTTTGAGATTGGCTTTGAAGAGTTCTCTGGCTGGAAATCAGTAAAGTAGATACTATCTTACCAATGGGGTTGGTGGACGTCTCTTGCCCTTTCTGGTACATGCGGTAGTGACGTGTGACAGTGCCATGGGCAGCCTCTGCTTCTACCGTCTTACCATCTGGACAAATCAGCACACTGGTCATCATGCCAAGGGAGCCATAACCTATAAGTGCAGAGCATGAAGTGTTGG	chr1	65161729	65161967		7
Inflammation_1	chr1	TXA0458856	IDH1_t8_2	CCTAGTTACCGCAAAGACTCA	CTGCCTTGTCAGAGAAAAAACTA	181	39	CCTAGTTACCGCAAAGACTCATTCTAAGCCCAGGTTTGACCTTAAAGTTTGGCCTGAGCTAATTTGGCCTTCAAGTTTTCTCCAAGTTTGTCCATAAACTCAAATGTATTCAAGTAGTCAGAACGTTGTACACTGGTGGGAGAAAAAAGAAAGAAATTTAGTTTTTTCTCTGACAAGGCAG	chr1	65159424	65159604	Assays designed by relax mode and have no off-target hits	2
Inflammation_1	chr1	TXA0458855	IDH1_t7_4	ATAAAGCCAGCCTCAATGGTCTC	ACCTGGAGTGATTTGAAATAGTGA	174	44	ATAAAGCCAGCCTCAATGGTCTCAATGCAGACGTCTTCCAAAGCCTTTGCGAAGAAGCTGAGCTCAGTATTGTTATCAAGCTTTGCTCTGTGGGCTAACCCTCGGGACCAGGCAAAAATGGAAGCTAAGGAAAGAAAACAAACAAAGAAATCACTATTTCAAATCACTCCAGGT	chr1	65161089	65161262		2
Inflammation_1	chr1	TXA0458854	IDH1_t7_2	GGAGTGATTTGACCACAGAGT	TGGTCCCGAGGGTTAGC	190	48	GGAGTGATTTGACCACAGAGTGCAGGGCATCTTACACTTACTTGGGTAAGCCTTTAATGCAAGCAGCCAAGTCCTTAGTCATAAAGCCAGCCTCAATGGTCTCAATGCAGACGTCTTCCAAAGCCTTTGCGAAGAAGCTGAGCTCAGTATTGTTATCAAGCTTTGCTCTGTGGGCTAACCCTCGGGACCA	chr1	65161009	65161198		6
Inflammation_1	IDH1	TXA0458853	IDH1_t7_1	TGCTGACCCCAGAAAAGACAAAC	CCCACAGAGCAAAGCTTGATAAC	217	46	TGCTGACCCCAGAAAAGACAAACAGCTCACATAATGTCAATGAGGAGTGATTTGACCACAGAGTGCAGGGCATCTTACACTTACTTGGGTAAGCCTTTAATGCAAGCAGCCAAGTCCTTAGTCATAAAGCCAGCCTCAATGGTCTCAATGCAGACGTCTTCCAAAGCCTTTGCGAAGAAGCTGAGCTCAGTATTGTTATCAAGCTTTGCTCTGTGGG	chr1	65160966	65161182		5
Inflammation_1	IDH1	TXA0458852	IDH1_t7_3	TAATGCAAGCAGCCAAGTCCTTA	CACTAGGAATCCCCATACCTGGA	216	44	TAATGCAAGCAGCCAAGTCCTTAGTCATAAAGCCAGCCTCAATGGTCTCAATGCAGACGTCTTCCAAAGCCTTTGCGAAGAAGCTGAGCTCAGTATTGTTATCAAGCTTTGCTCTGTGGGCTAACCCTCGGGACCAGGCAAAAATGGAAGCTAAGGAAAGAAAACAAACAAAGAAATCACTATTTCAAATCACTCCAGGTATGGGGATTCCTAGTG	chr1	65161063	65161278		8
Inflammation_1	IDH1	TXA0458851	IDH1_t8_1	ACGTAAACCTGTGGACCTAGTTA	AGAAGTGTGAGTAGCATTACTGTG	239	38	ACGTAAACCTGTGGACCTAGTTACCGCAAAGACTCATTCTAAGCCCAGGTTTGACCTTAAAGTTTGGCCTGAGCTAATTTGGCCTTCAAGTTTTCTCCAAGTTTGTCCATAAACTCAAATGTATTCAAGTAGTCAGAACGTTGTACACTGGTGGGAGAAAAAAGAAAGAAATTTAGTTTTTTCTCTGACAAGGCAGGAGGTAATTAAAAACAAATCACAGTAATGCTACTCACACTTCT	chr1	65159409	65159647		1
Inflammation_1	chr18	TXA0458850	SMAD4_t1_5	CCCCACCTTGTCTATGACACATC	ATTGGCCATTGGTTTTCACTGC	177	36	CCCCACCTTGTCTATGACACATCAAACTATGTACAATGCTCAGACAGGCATCGTTACTTGTTGGTGTATTTGTTATAGACATATTGTCCATTTGTTCAAGTTTTTTCTTTTAAATCCAACTCTCCAATTTCTGGAGTAATTTTGATCTTTTGAAGGCAGTGAAAACCAATGGCCAAT	chr18	73677821	73677997		2
Inflammation_1	chr18	TXA0458849	SMAD4_t1_3	TTGCTAGGATGAGCTCCATTTGT	ATACACCAACAAGTAACGATGCC	187	37	TTGCTAGGATGAGCTCCATTTGTAGTTATAGCTGTTATTAAAGAATCCAATTCATCTTTTTTCTCTTTCAGCTTCTTTACCAAACTCTCAATTGCTCTTTTTGCAAAGGTTTCACTTTCCCCACCTTGTCTATGACACATCAAACTATGTACAATGCTCAGACAGGCATCGTTACTTGTTGGTGTAT	chr18	73677703	73677889		8
Inflammation_1	chr18	TXA0458848	SMAD4_t1_1	GTGGAGCTCACATTAAATTGGTA	TGAGAGTTTGGTAAAGAAGCTGA	218	36	GTGGAGCTCACATTAAATTGGTAGTAACTTAAGAGGAAATTTAAAAATATCTATTACTCTACCAGCACAGAAGACATACAAGACTAACCTGAAGTCGTCCATCCAATGTTCTCTGTATGGTGACACACTTGCTAGGATGAGCTCCATTTGTAGTTATAGCTGTTATTAAAGAATCCAATTCATCTTTTTTCTCTTTCAGCTTCTTTACCAAACTCTCA	chr18	73677575	73677792		5
Inflammation_1	SMAD4	TXA0458847	SMAD4_t1_2	TTACTCTACCAGCACAGAAGACA	TGATGTGTCATAGACAAGGTGGG	217	39	TTACTCTACCAGCACAGAAGACATACAAGACTAACCTGAAGTCGTCCATCCAATGTTCTCTGTATGGTGACACACTTGCTAGGATGAGCTCCATTTGTAGTTATAGCTGTTATTAAAGAATCCAATTCATCTTTTTTCTCTTTCAGCTTCTTTACCAAACTCTCAATTGCTCTTTTTGCAAAGGTTTCACTTTCCCCACCTTGTCTATGACACATCA	chr18	73677628	73677844		4
Inflammation_1	chr18	TXA0458846	SMAD4_t1_4	GCTCCATTTGTAGTTATAGCTGTT	CCAGAAATTGGAGAGTTGGATTT	240	35	GCTCCATTTGTAGTTATAGCTGTTATTAAAGAATCCAATTCATCTTTTTTCTCTTTCAGCTTCTTTACCAAACTCTCAATTGCTCTTTTTGCAAAGGTTTCACTTTCCCCACCTTGTCTATGACACATCAAACTATGTACAATGCTCAGACAGGCATCGTTACTTGTTGGTGTATTTGTTATAGACATATTGTCCATTTGTTCAAGTTTTTTCTTTTAAATCCAACTCTCCAATTTCTGG	chr18	73677715	73677954		7
Inflammation_1	chr18	TXA0458845	SMAD4_t2_2	TCTTTTCCCTTTACACATCTATGA	GCCTGATCTACACAAGAATGAAC	172	41	TCTTTTCCCTTTACACATCTATGAAGGTGCTGCAGTGGCAGTCAACTTACCAATTCCAGGTGAGACAACCCGCTCATAGTGATATGGATTCACACAGACACTGTCACATTTTAAGTCAAACGCATACTGACAATATTTAACATGCTTTAGTTCATTCTTGTGTAGATCAGGC	chr18	73675721	73675892		1
Inflammation_1	chr18	TXA0458844	SMAD4_t2_4	ACAGACACTGTCACATTTTAAGTC	agtgtcacaGATGCTCACTC	208	42	ACAGACACTGTCACATTTTAAGTCAAACGCATACTGACAATATTTAACATGCTTTAGTTCATTCTTGTGTAGATCAGGCCACCTCCACAGACGGGCATAGATCACATGAGGAAATCCTTTCCGACCAGCCACCTAGGAAAAGAAACGATCATTTATTAAGTGTAAGTCCTTGCATGACTTACTACCCAGAGTGAGCATCtgtgacact	chr18	73675814	73676021	One primer sits in the repeat region	3
Inflammation_1	chr18	TXA0458843	SMAD4_t3_1	TCAGTGTAGCAATTTTTCTCGTG	ATGTAATGGAAGATAAGTTCATTGT	218	28	TCAGTGTAGCAATTTTTCTCGTGTTACTAGCTCCTACACAAACCACTTGTTTATGAACAAAAAATAAACAAGACATGTTAAAAGAAAATATAAAAAAATTAGAAGAATCCAGTTACTTACCATTACTCTGCAGTGTTAATCCTGAGAGATCTTATTTTTTTAAAAGGGAAAGAAAATAAAAACATAAATCATTACAATGAACTTATCTTCCATTACAT	chr18	73675041	73675258	Assays designed by relax mode and have no off-target hits	2
Inflammation_1	SMAD4	TXA0458842	SMAD4_t2_1	TGACTAGGATCTTTTCCCTTTACACA	CTGGTCGGAAAGGATTTCCTCAT	230	43	TGACTAGGATCTTTTCCCTTTACACATCTATGAAGGTGCTGCAGTGGCAGTCAACTTACCAATTCCAGGTGAGACAACCCGCTCATAGTGATATGGATTCACACAGACACTGTCACATTTTAAGTCAAACGCATACTGACAATATTTAACATGCTTTAGTTCATTCTTGTGTAGATCAGGCCACCTCCACAGACGGGCATAGATCACATGAGGAAATCCTTTCCGACCAG	chr18	73675712	73675941		7
Inflammation_1	SMAD4	TXA0458841	SMAD4_t2_3	GAGACAACCCGCTCATAGTGATA	CTGGGTAGTAAGTCATGCAAGGA	221	42	GAGACAACCCGCTCATAGTGATATGGATTCACACAGACACTGTCACATTTTAAGTCAAACGCATACTGACAATATTTAACATGCTTTAGTTCATTCTTGTGTAGATCAGGCCACCTCCACAGACGGGCATAGATCACATGAGGAAATCCTTTCCGACCAGCCACCTAGGAAAAGAAACGATCATTTATTAAGTGTAAGTCCTTGCATGACTTACTACCCAG	chr18	73675782	73676002		6
Inflammation_1	SMAD4	TXA0458840	SMAD4_t3_2	ACTAGCTCCTACACAAACCACTTG	CTGGCTTAAATTGATGTTCTGTAACT	223	27	ACTAGCTCCTACACAAACCACTTGTTTATGAACAAAAAATAAACAAGACATGTTAAAAGAAAATATAAAAAAATTAGAAGAATCCAGTTACTTACCATTACTCTGCAGTGTTAATCCTGAGAGATCTTATTTTTTTAAAAGGGAAAGAAAATAAAAACATAAATCATTACAATGAACTTATCTTCCATTACATTTTAAGTTACAGAACATCAATTTAAGCCAG	chr18	73675066	73675288		5
Inflammation_1	chr18	TXA0458839	SMAD4_t4_4	GGGGCGCTGTACGTCT	TGGAAGACTGTGAAAATCTTTTTTG	179	47	GGGGCGCTGTACGTCTCCGTTGATGCGCGATTACTTGGCGGGTGTTGGATGGTTTGAATCGAATGTCCTTCAGTGGGTAAGGACGGCTGTCCTTCAAAGTCGTGAACGTACTCATCCTTCACTAACATACTTGGAGCTACGCATAAAACACAAACAAAAAAGATTTTCACAGTCTTCCA	chr18	73662732	73662910		3
Inflammation_1	SMAD4	TXA0458835	SMAD4_t4_1	CAGCACCAGAAAGACCACAAAAG	TCGATTCAAACCATCCAACACCC	229	52	CAGCACCAGAAAGACCACAAAAGCTCCAAGTGGCTACACATAAATACTTGATGGTGAGGAAAACTTTCGACTCGATCTGACTGCAACACTCACTTGTGGAAGCCACAGGAATGTTGGGGAAGTTGGTGGTGCTGGTGGCGTTAGACTCTGCCGGGGCTAACAGAGCCGGGGCGCTGTACGTCTCCGTTGATGCGCGATTACTTGGCGGGTGTTGGATGGTTTGAATCGA	chr18	73662565	73662793		8
Inflammation_1	SMAD4	TXA0458834	SMAD4_t4_3	GGAAGTTGGTGGTGCTGGT	TCTGTGGAAATGGAAGACTGTGA	239	50	GGAAGTTGGTGGTGCTGGTGGCGTTAGACTCTGCCGGGGCTAACAGAGCCGGGGCGCTGTACGTCTCCGTTGATGCGCGATTACTTGGCGGGTGTTGGATGGTTTGAATCGAATGTCCTTCAGTGGGTAAGGACGGCTGTCCTTCAAAGTCGTGAACGTACTCATCCTTCACTAACATACTTGGAGCTACGCATAAAACACAAACAAAAAAGATTTTCACAGTCTTCCATTTCCACAGA	chr18	73662682	73662920		1
Inflammation_1	SMAD4	TXA0458833	SMAD4_t5_1	AGGCCCATATGCATTAATTTGCT	TCCATGTGCCATGTTAATGTCTTC	240	43	AGGCCCATATGCATTAATTTGCTTTTATAAAGGCTGCCTATTTTTTCTCAACTATTTAAAAGGTTTTAAAAAGCATGTACATACTATGATGGTAAGTAGCTGGCTGAGCAGTAAATCCATTCTGCTGCTGTCCTGGCTGAGGCCCTGAAGCTATCTGCAACAGTCCTTCACTATGGCTGCCCGCCAGAATACTGGCCGGCTGACCTAGAGAAACAAGAAGACATTAACATGGCACATGGA	chr18	73658695	73658934		8
Inflammation_1	chr18	TXA0458832	SMAD4_t6_3	ACAATGAAAACGAGAGCTTACAG	ATAAAAGCAAATTAATGCATATGGG	176	47	ACAATGAAAACGAGAGCTTACAGTAATGTCCAGGATGGGGCGGCATAGGCGGGTGGTGCTGAAGATGGCCGTTTTGGTGGTGAGGCAAATTAGGTGTGTATGGTGCAGTCCTACTTCCAGTCCAGGTGGTAGTGCTGTCTAAAAATTAAGGCCCATATGCATTAATTTGCTTTTAT	chr18	73658547	73658722		3
Inflammation_1	chr18	TXA0458831	SMAD4_t6_2	AGAAAATAGAAATCAAAGTCCTAGC	AAGTAGGACTGCACCATACAC	164	46	AGAAAATAGAAATCAAAGTCCTAGCTAGAAAAGAAAAAGGCCCTGCTTACAATGAAAACGAGAGCTTACAGTAATGTCCAGGATGGGGCGGCATAGGCGGGTGGTGCTGAAGATGGCCGTTTTGGTGGTGAGGCAAATTAGGTGTGTATGGTGCAGTCCTACTT	chr18	73658499	73658662		1
Inflammation_1	chr18	TXA0458830	SMAD4_t7_2	AGTTTAGTTACCCTGTAATATGCAC	AAATGGGGTTTTTATTATGTTTTCTT	171	33	AGTTTAGTTACCCTGTAATATGCACTGGCATATGCATATCAATTATCATAATAAATATATACAGAAAATCAATATTGAAATATACTTACCAGGATGATTGGAAATGGGAGGCTGGAATGCAAGCTCATTGTGAACTGGCCCTAAGAAGAAAACATAATAAAAACCCCATTT	chr18	73657106	73657276		2
Inflammation_1	SMAD4	TXA0458829	SMAD4_t6_4	CAGGATGGGGCGGCATAG	TTACTGCTCAGCCAGCTACTTAC	232	43	CAGGATGGGGCGGCATAGGCGGGTGGTGCTGAAGATGGCCGTTTTGGTGGTGAGGCAAATTAGGTGTGTATGGTGCAGTCCTACTTCCAGTCCAGGTGGTAGTGCTGTCTAAAAATTAAGGCCCATATGCATTAATTTGCTTTTATAAAGGCTGCCTATTTTTTCTCAACTATTTAAAAGGTTTTAAAAAGCATGTACATACTATGATGGTAAGTAGCTGGCTGAGCAGTAA	chr18	73658577	73658808		6
Inflammation_1	chr18	TXA0458828	SMAD4_t6_1	AAAAAGATGCAAAACCATTTTTTAAG	GGGCCTTAATTTTTAGACAGCA	226	44	AAAAAGATGCAAAACCATTTTTTAAGAAAATAGAAATCAAAGTCCTAGCTAGAAAAGAAAAAGGCCCTGCTTACAATGAAAACGAGAGCTTACAGTAATGTCCAGGATGGGGCGGCATAGGCGGGTGGTGCTGAAGATGGCCGTTTTGGTGGTGAGGCAAATTAGGTGTGTATGGTGCAGTCCTACTTCCAGTCCAGGTGGTAGTGCTGTCTAAAAATTAAGGCCC	chr18	73658475	73658700		4
Inflammation_1	chr18	TXA0458827	SMAD4_t7_1	ACACTATCTGAGTTTAGTTACCCT	AGCACTGGAAAACTTTTAATGAAT	206	33	ACACTATCTGAGTTTAGTTACCCTGTAATATGCACTGGCATATGCATATCAATTATCATAATAAATATATACAGAAAATCAATATTGAAATATACTTACCAGGATGATTGGAAATGGGAGGCTGGAATGCAAGCTCATTGTGAACTGGCCCTAAGAAGAAAACATAATAAAAACCCCATTTTATTCATTAAAAGTTTTCCAGTGCT	chr18	73657096	73657301		5
Inflammation_1	chr18	TXA0458826	SMAD4_t8_2	ACATAGAAAAACAATAGTCTGGAAT	GCCCTGTTGTGACTGTG	174	43	ACATAGAAAAACAATAGTCTGGAATAAAAGTTAATGTACTATTCAATTTCTTTACTCTCGAAACATACCTCGCTCTCTCAATCGCTTCTGTCCTGTGGACATTGGAGAGTTGACCCAAGCAAAAGCGATCTCCTCCCGAAGGATCCACATAGCCATCCACAGTCACAACAGGGC	chr18	73649658	73649831		1
Inflammation_1	chr18	TXA0458825	SMAD4_t8_3	CTGTGGACATTGGAGAGTTGA	GCTCTGTTCCCTGTGCTTTC	185	51	CTGTGGACATTGGAGAGTTGACCCAAGCAAAAGCGATCTCCTCCCGAAGGATCCACATAGCCATCCACAGTCACAACAGGGCAGCTTGAAGGGACCTTAAACGTCTCTCCTACCTGAACGTCCATTTCAAAGTAAGCAATGGAGCACCAGTACTCAGGAGCTACAGAAAGCACAGGGAACAGAGC	chr18	73649750	73649934		6
Inflammation_1	chr18	TXA0458824	SMAD4_t9_4	GAACAGCGTCGCCAGGT	TGAAATGTAGTTCTGTCTTTCCTTCC	170	51	GAACAGCGTCGCCAGGTGCTCGGCCAGCTTCTCTGTCCAGGTAGTAACTCTGTACAAAGACCGCGTGGTCACTAAGGCACCTGACCCAAACGTCACCTTCACCTTTACATTCCAACTGCACTCCTTTGCCTATGTGCAACCTCAGGAAGGAAAGACAGAACTACATTTCA	chr18	73648914	73649083		7
Inflammation_1	chr18	TXA0458823	SMAD4_t9_2	CTTCCAGGCTTCAGGCAACA	AGGAGTGCAGTTGGAATGTAAAG	214	48	CTTCCAGGCTTCAGGCAACAGAGGGTTTTAAGTCTAAAATACTTACATATAAACACTGACCTTTATATACGCGCTTGGGTAGATCTTATGAACAGCGTCGCCAGGTGCTCGGCCAGCTTCTCTGTCCAGGTAGTAACTCTGTACAAAGACCGCGTGGTCACTAAGGCACCTGACCCAAACGTCACCTTCACCTTTACATTCCAACTGCACTCCT	chr18	73648825	73649038		5
Inflammation_1	SMAD4	TXA0458822	SMAD4_t8_4	TGGAGAGTTGACCCAAGCAAAAG	GGTTTTGGTTTCTTGGTGAGGTG	235	53	TGGAGAGTTGACCCAAGCAAAAGCGATCTCCTCCCGAAGGATCCACATAGCCATCCACAGTCACAACAGGGCAGCTTGAAGGGACCTTAAACGTCTCTCCTACCTGAACGTCCATTTCAAAGTAAGCAATGGAGCACCAGTACTCAGGAGCTACAGAAAGCACAGGGAACAGAGCACAGGCCTCTGTGACAGGGCTCAGGGAGGGAGGGAGTCACCTCACCAAGAAACCAAAACC	chr18	73649760	73649994		2
Inflammation_1	chr18	TXA0458821	SMAD4_t8_1	TTGAAAATGACTTAATTCCTCGAT	TGACTGTGGATGGCTATGTG	203	39	TTGAAAATGACTTAATTCCTCGATATTTAAGCTCATATACATAGAAAAACAATAGTCTGGAATAAAAGTTAATGTACTATTCAATTTCTTTACTCTCGAAACATACCTCGCTCTCTCAATCGCTTCTGTCCTGTGGACATTGGAGAGTTGACCCAAGCAAAAGCGATCTCCTCCCGAAGGATCCACATAGCCATCCACAGTCA	chr18	73649620	73649822		3
Inflammation_1	SMAD4	TXA0458820	SMAD4_t9_3	CGCGCTTGGGTAGATCTTATGAA	TGCACCTGAACTGAAACCTGTTA	221	49	CGCGCTTGGGTAGATCTTATGAACAGCGTCGCCAGGTGCTCGGCCAGCTTCTCTGTCCAGGTAGTAACTCTGTACAAAGACCGCGTGGTCACTAAGGCACCTGACCCAAACGTCACCTTCACCTTTACATTCCAACTGCACTCCTTTGCCTATGTGCAACCTCAGGAAGGAAAGACAGAACTACATTTCATCTTGTTATAACAGGTTTCAGTTCAGGTGCA	chr18	73648894	73649114		4
Inflammation_1	SMAD4	TXA0458819	SMAD4_t9_1	ACCTAAGACAGCTTCCACTACCT	TAAAGGTGAAGGTGACGTTTGGG	228	48	ACCTAAGACAGCTTCCACTACCTTCACCTCCACTTCCAGGCTTCAGGCAACAGAGGGTTTTAAGTCTAAAATACTTACATATAAACACTGACCTTTATATACGCGCTTGGGTAGATCTTATGAACAGCGTCGCCAGGTGCTCGGCCAGCTTCTCTGTCCAGGTAGTAACTCTGTACAAAGACCGCGTGGTCACTAAGGCACCTGACCCAAACGTCACCTTCACCTTTA	chr18	73648793	73649020		8
Inflammation_1	chr18	TXA0458818	SMAD4_t10_3	CCAGGGCCAGGGATGTTC	TGGCTTCTCATGAATGGAGTCTTT	178	56	CCAGGGCCAGGGATGTTCCCTGCCACGGCCGCCGCCTGAGCAGCAGCTGCAGCTTGCGCAGTGGCCGCCTGTTGCTGCATCTGCCGGTGACACTGCCGCAGATCAAAGACCTTTTAAAAGCAAAAGTGTAAGTTTACTATATGAGTGCACTGCCAAAGACTCCATTCATGAGAAGCCA	chr18	73641812	73641989		1
Inflammation_1	chr18	TXA0458817	SMAD4_t11_3	CTGCAGAGCTCGGTGAAGG	CCTCCACACTTGTGCTTCTTTCC	183	57	CTGCAGAGCTCGGTGAAGGTGAATCTCAATCCAGCACGGGGTTTCCTTGATGCTCTGCCTGGGGTAGTCTGGGCCCCAGCCCTTCACAAAGCTCATCCTGAGAATGCACAATCGCCGGAGGTCATCCACACCGATGCCAGCAGCAGCAGACAGACCTAACGGAAAGAAGCACAAGTGTGGAGG	chr18	73640315	73640497		3
Inflammation_1	chr18	TXA0458816	SMAD4_t11_2	GTCCACCATCCTGGAAATGGTTA	GACTACCCCAGGCAGAGCAT	170	56	GTCCACCATCCTGGAAATGGTTAGGGCGTCCGTGGTGTGAGATCTCAGTCTAAAGGCTGTGGGTCCGCAATGGGCATGGTGTGCAGGACTTCATCCAAGAGCTGCAGAGCTCGGTGAAGGTGAATCTCAATCCAGCACGGGGTTTCCTTGATGCTCTGCCTGGGGTAGTC	chr18	73640214	73640383		7
Inflammation_1	SMAD4	TXA0458815	SMAD4_t10_2	CTATTCCACCCACGGACCCAG	TCCGGGTTGTTGATACATTGCTT	220	54	CTATTCCACCCACGGACCCAGGGCCAGGGATGTTCCCTGCCACGGCCGCCGCCTGAGCAGCAGCTGCAGCTTGCGCAGTGGCCGCCTGTTGCTGCATCTGCCGGTGACACTGCCGCAGATCAAAGACCTTTTAAAAGCAAAAGTGTAAGTTTACTATATGAGTGCACTGCCAAAGACTCCATTCATGAGAAGCCAATAAGCAATGTATCAACAACCCGGA	chr18	73641795	73642014		4
Inflammation_1	SMAD4	TXA0458814	SMAD4_t10_1	GAGTGAACCGAGGTTACAAGTCA	GCAGTGTCACCGGCAGAT	185	60	GAGTGAACCGAGGTTACAAGTCACCACTGTACTCTGAACAGAAAAGTCAAAGGTACGTACTGATGGCTGGAGCTATTCCACCCACGGACCCAGGGCCAGGGATGTTCCCTGCCACGGCCGCCGCCTGAGCAGCAGCTGCAGCTTGCGCAGTGGCCGCCTGTTGCTGCATCTGCCGGTGACACTGC	chr18	73641723	73641907		8
Inflammation_1	SMAD4	TXA0458813	SMAD4_t11_4	TCGGTGAAGGTGAATCTCAATCC	ATAAGCAAAGAAGGCAGACTGGG	230	57	TCGGTGAAGGTGAATCTCAATCCAGCACGGGGTTTCCTTGATGCTCTGCCTGGGGTAGTCTGGGCCCCAGCCCTTCACAAAGCTCATCCTGAGAATGCACAATCGCCGGAGGTCATCCACACCGATGCCAGCAGCAGCAGACAGACCTAACGGAAAGAAGCACAAGTGTGGAGGCTGTGAGGGCGCAGGTCCTCTCTTCCCATCCTCCCCAGTCTGCCTTCTTTGCTTAT	chr18	73640324	73640553		5
Inflammation_1	SMAD4	TXA0458812	SMAD4_t11_1	ACACGAGTATATTTCATAGTCCACCA	TGTGCATTCTCAGGATGAGCTTT	229	54	ACACGAGTATATTTCATAGTCCACCATCCTGGAAATGGTTAGGGCGTCCGTGGTGTGAGATCTCAGTCTAAAGGCTGTGGGTCCGCAATGGGCATGGTGTGCAGGACTTCATCCAAGAGCTGCAGAGCTCGGTGAAGGTGAATCTCAATCCAGCACGGGGTTTCCTTGATGCTCTGCCTGGGGTAGTCTGGGCCCCAGCCCTTCACAAAGCTCATCCTGAGAATGCACA	chr18	73640196	73640424		6
Inflammation_1	chr19	TXA0447618	RELA_t11_2	GGCCGTGTATGTCTCTCAC	CAGAGGACGGTGCCAAG	175	57	GGCCGTGTATGTCTCTCACTGCCTCTGAGCCTTTGTTCTTTGTCTCTCTCTCCAGCCCCGCAGCCCTACACCTTCCCAGCATCCCTCAGCACCATCAACTTTGATGAGTTTTCCCCCATGCTGTTACCATCAGGGCAGATCTCAAACCAGgccctggccttggcaccgtcctctg	chr19	5646745	5646919	One primer sits in the repeat region	5
Inflammation_1	chr19	TXA0447617	RELA_t11_3	GAGTTTTCCCCCATGCTGTTACC	CAGCGTGCCTTCCCCAG	219	63	GAGTTTTCCCCCATGCTGTTACCATCAGGGCAGATCTCAAACCAGgccctggccttggcaccgtcctctgccccagtccttgcccagaccatggtcccttcctcagccatggtacctctggctcagcccccagctcctgccccagttctaaccccgggtcctccccagtcccTGTCTGCACCTGTTCCAAAGAGCACCCAGGCTGGGGAAGGCACGCTG	chr19	5646850	5647068		6
Inflammation_1	chr19	TXA0447616	RELA_t11_7	TTTGATGCTGATGAAGACTTGGG	GTGTGGGAGCTGGGTCA	220	57	TTTGATGCTGATGAAGACTTGGGGGCCTTGCTTGGCAACAGCACAGACCCAGGAGTGTTCACAGACCTGGCATCTGTGGACAACTCAGAGTTTCAGCAGCTCCTGAACCAGGGTGTGTCCATGTCTCACTCCACAGCTGAGCCCATGCTGATGGAGTACCCTGAAGCTATAACTCGCCTGGTGACAGGGTCCCAGAGGCCCCCTGACCCAGCTCCCACAC	chr19	5647093	5647312		3
Inflammation_1	chr19	TXA0447615	RELA_t11_5	GTTCTAACCCCGGGTCCT	ACTCTGAGTTGTCCACAGATG	190	59	gttctaaccccgggtcctccccagtcccTGTCTGCACCTGTTCCAAAGAGCACCCAGGCTGGGGAAGGCACGCTGTCGGAAGCCCTGCTGCACCTGCAGTTTGATGCTGATGAAGACTTGGGGGCCTTGCTTGGCAACAGCACAGACCCAGGAGTGTTCACAGACCTGGCATCTGTGGACAACTCAGAGT	chr19	5646994	5647183	One primer sits in the repeat region	4
Inflammation_1	chr19	TXA0447614	RELA_t11_10	AGCTATAACTCGCCTGGT	CTTCGGGAAGGCTTCAGT	220	59	AGCTATAACTCGCCTGGTGACAGGGTCCCAGAGGCCCCCTGACCCAGCTCCCACACCCCTGGGGACCTCGGGGCTTCCCAATGGTCTCTCAGGAGATGAAGACTTCTCCTCCATTGCGGACATGGACTTCTCTGCTCTTTTGAGTCAGATCAGCTCCTAAGGTGCTGACAGCGACCCTGCTCAGAGCACCAGGTTTCAGGGCACTGAAGCCTTCCCGAAG	chr19	5647257	5647476		8
Inflammation_1	RELA	TXA0447613	RELA_t11_1	ATTCTAAGCATGGTAGAGCTGGG	CATGGTCTGGGCAAGGACTG	238	57	ATTCTAAGCATGGTAGAGCTGGGTCAGGTGGTGGCAGAGGGGCCGTGTATGTCTCTCACTGCCTCTGAGCCTTTGTTCTTTGTCTCTCTCTCCAGCCCCGCAGCCCTACACCTTCCCAGCATCCCTCAGCACCATCAACTTTGATGAGTTTTCCCCCATGCTGTTACCATCAGGGCAGATCTCAAACCAGgccctggccttggcaccgtcctctgccccagtccttgcccagaccatg	chr19	5646705	5646942	One primer sits in the repeat region	8
Inflammation_1	RELA	TXA0447612	RELA_t11_8	CAACAGCACAGACCCAGGAG	ATCTCCTGAGAGACCATTGGGAA	226	59	CAACAGCACAGACCCAGGAGTGTTCACAGACCTGGCATCTGTGGACAACTCAGAGTTTCAGCAGCTCCTGAACCAGGGTGTGTCCATGTCTCACTCCACAGCTGAGCCCATGCTGATGGAGTACCCTGAAGCTATAACTCGCCTGGTGACAGGGTCCCAGAGGCCCCCTGACCCAGCTCCCACACCCCTGGGGACCTCGGGGCTTCCCAATGGTCTCTCAGGAGAT	chr19	5647128	5647353		1
Inflammation_1	RELA	TXA0447611	RELA_t11_4	CATCAGGGCAGATCTCAAACCA	AGTCTTCATCAGCATCAAACTGC	240	63	CATCAGGGCAGATCTCAAACCAGgccctggccttggcaccgtcctctgccccagtccttgcccagaccatggtcccttcctcagccatggtacctctggctcagcccccagctcctgccccagttctaaccccgggtcctccccagtcccTGTCTGCACCTGTTCCAAAGAGCACCCAGGCTGGGGAAGGCACGCTGTCGGAAGCCCTGCTGCACCTGCAGTTTGATGCTGATGAAGACT	chr19	5646872	5647111		7
Inflammation_1	RELA	TXA0447610	RELA_t11_6	ccccagtcccTGTCTGC	GGCTCAGCTGTGGAGTGAGA	224	58	ccccagtcccTGTCTGCACCTGTTCCAAAGAGCACCCAGGCTGGGGAAGGCACGCTGTCGGAAGCCCTGCTGCACCTGCAGTTTGATGCTGATGAAGACTTGGGGGCCTTGCTTGGCAACAGCACAGACCCAGGAGTGTTCACAGACCTGGCATCTGTGGACAACTCAGAGTTTCAGCAGCTCCTGAACCAGGGTGTGTCCATGTCTCACTCCACAGCTGAGCC	chr19	5647012	5647235	One primer sits in the repeat region	2
Inflammation_1	RELA	TXA0447609	RELA_t11_9	CATGCTGATGGAGTACCCTGAAG	GCCCTGAAACCTGGTGCT	223	58	CATGCTGATGGAGTACCCTGAAGCTATAACTCGCCTGGTGACAGGGTCCCAGAGGCCCCCTGACCCAGCTCCCACACCCCTGGGGACCTCGGGGCTTCCCAATGGTCTCTCAGGAGATGAAGACTTCTCCTCCATTGCGGACATGGACTTCTCTGCTCTTTTGAGTCAGATCAGCTCCTAAGGTGCTGACAGCGACCCTGCTCAGAGCACCAGGTTTCAGGGC	chr19	5647236	5647458		5
Inflammation_1	chr19	TXA0447608	RELA_t10_2	CCCGGGGTCTGAAAGCTG	TCAGTCTGAACAAATGAGACCCT	166	52	CCCGGGGTCTGAAAGCTGACTTAGCTTTTGCCCTGTAGGACCAACTGAACCCCGGCCTCCAACCCGGCGTATTGCTGTGCCTACCCGAAACTCAACTTCTGTCCCCAAGCCAGGTAAGGAAGTCCTTTTCTTTTTCTAGAATGAGGGTCTCATTTGTTCAGACTGA	chr19	5645475	5645640		7
Inflammation_1	chr19	TXA0447607	RELA_t9_1	GAGAGCCCATAGAAGGGAGAAGT	CTCTCCCTCAGGCTTTCCTCAT	179	50	GAGAGCCCATAGAAGGGAGAAGTGCAGCCCGGCTAAGGAGAGTAAACCCACCATCCATATTGCTTTCCCAGATGATCGCCACCGGATTGAAGAGAAGCGCAAAAGGACCTATGAGACCTTCAAGAGTATCATGAAGAAGAGTCCTTTCAATGGTGAGATGAGGAAAGCCTGAGGGAGAG	chr19	5645254	5645432		6
Inflammation_1	RELA	TXA0447606	RELA_t10_1	CTAGAGTCAGTGAGAGGACACCC	AGAACTCTGCAGGTGAGACCAAT	235	50	CTAGAGTCAGTGAGAGGACACCCGGGGTCTGAAAGCTGACTTAGCTTTTGCCCTGTAGGACCAACTGAACCCCGGCCTCCAACCCGGCGTATTGCTGTGCCTACCCGAAACTCAACTTCTGTCCCCAAGCCAGGTAAGGAAGTCCTTTTCTTTTTCTAGAATGAGGGTCTCATTTGTTCAGACTGAAGTAGTATCTTCTAGAAGGGGACCAAATTGGTCTCACCTGCAGAGTTCT	chr19	5645455	5645689		3
Inflammation_1	RELA	TXA0447605	RELA_t9_2	CGGCTAAGGAGAGTAAACCCAC	GTCCTACAGGGCAAAAGCTAAGT	233	52	CGGCTAAGGAGAGTAAACCCACCATCCATATTGCTTTCCCAGATGATCGCCACCGGATTGAAGAGAAGCGCAAAAGGACCTATGAGACCTTCAAGAGTATCATGAAGAAGAGTCCTTTCAATGGTGAGATGAGGAAAGCCTGAGGGAGAGGAGTGGGCAGGCCAGCCAAGTCCTAGAGTCAGTGAGAGGACACCCGGGGTCTGAAAGCTGACTTAGCTTTTGCCCTGTAGGAC	chr19	5645283	5645515		1
Inflammation_1	chr19	TXA0447604	RELA_t8_2	TTGGGTCACACATACTAACCCAT	TGAGCTCGCGATCAGAAGG	220	58	TTGGGTCACACATACTAACCCATACTGCCACTGTCTCCTGCAGAAGACATTGAGGTGTATTTCACGGGACCAGGCTGGGAGGCACGAGGCTCCTTTTCTCAAGCTGATGTGCATCGGCAAGTGGCCATTGTGTTCCGGACTCCTCCGTACGCCGACCCCAGCCTCCAGGCTCCTGTTCGAGTCTCCATGCAGCTACGGCGGCCTTCTGATCGCGAGCTCA	chr19	5641421	5641640		2
Inflammation_1	chr19	TXA0447603	RELA_t8_4	ATGTGCATCGGCAAGTGG	CTGTGGCCCTGCCCTC	190	64	ATGTGCATCGGCAAGTGGCCATTGTGTTCCGGACTCCTCCGTACGCCGACCCCAGCCTCCAGGCTCCTGTTCGAGTCTCCATGCAGCTACGGCGGCCTTCTGATCGCGAGCTCAGTGAGCCCATGGAGTTCCAGTACTTGCCAGACACAGGTGTGACAGCCGCCGCTGCGGAGGGAGGGCAGGGCCACAG	chr19	5641527	5641716		6
Inflammation_1	RELA	TXA0447602	RELA_t8_1	AGGTGATGTCACAGGGAAAAACA	CATGGAGACTCGAACAGGAGC	236	55	AGGTGATGTCACAGGGAAAAACATCAGGTGTTGAGGACAACAACCAGTTGGGTCACACATACTAACCCATACTGCCACTGTCTCCTGCAGAAGACATTGAGGTGTATTTCACGGGACCAGGCTGGGAGGCACGAGGCTCCTTTTCTCAAGCTGATGTGCATCGGCAAGTGGCCATTGTGTTCCGGACTCCTCCGTACGCCGACCCCAGCCTCCAGGCTCCTGTTCGAGTCTCCATG	chr19	5641374	5641609		7
Inflammation_1	RELA	TXA0447601	RELA_t8_3	GGCTCCTTTTCTCAAGCTGATGT	CTTTGGTCCCGCCCTCTG	236	64	GGCTCCTTTTCTCAAGCTGATGTGCATCGGCAAGTGGCCATTGTGTTCCGGACTCCTCCGTACGCCGACCCCAGCCTCCAGGCTCCTGTTCGAGTCTCCATGCAGCTACGGCGGCCTTCTGATCGCGAGCTCAGTGAGCCCATGGAGTTCCAGTACTTGCCAGACACAGGTGTGACAGCCGCCGCTGCGGAGGGAGGGCAGGGCCACAGCCGCTGCTGCAGAGGGCGGGACCAAAG	chr19	5641508	5641743		5
Inflammation_1	RELA	TXA0447598	RELA_t7_2	CGGGCGTTAGAGCTCCTG	CTGAGGTAGCTGGCACTCAT	225	60	CGGGCGTTAGAGCTCCTGCAGGGTACCCTGAGACCGCTGATGTTTCAGGGGCCCCCAACACTGCCGAGCTCAAGATCTGCCGAGTAAACCGGAACTCTGGGAGCTGCCTCGGTGGGGATGAGATCTTCTTGCTGTGCGACAAGGTGCAGAAAGGTACACACTGGACTCTGCACGGAGAGGGGAGGGGTGAGGCTGAGCGGAGGTGATGAGTGCCAGCTACCTCAG	chr19	5641133	5641357		3
Inflammation_1	chr19	TXA0447595	RELA_t5_2	TGAGAGCTGTGGAGTTGGGA	GATCAATGTCTTTGCCCCTTGC	190	53	TGAGAGCTGTGGAGTTGGGAGGCAAGAAGGGGCTCTGCTGGAGACACAAAACTAATACCTGAGGCCTCAGCTTCCAGAACCTGGGGATCCAGTGTGTGAAGAAGCGAGACCTGGAGCAAGCCATTAGCCAGCGAATCCAGACCAACAATAACCCCTTTCACGGTAGGAGCAAGGGGCAAAGACATTGATC	chr19	5639789	5639978		7
Inflammation_1	RELA	TXA0447594	RELA_t6_1	CCCAATGCCTTCCACCACA	CCCGCCCTCATCCCTACTG	227	53	CCCAATGCCTTCCACCACAGtgttttgttttttgtttttgttgtttttttgtttttgACAGTTCCTATAGAGGAGCAGCGCGGGGACTATGACTTGAATGCAGTGCGCCTCTGCTTCCAGGTGACAGTGCGGGACCCAGCAGGCAGGCCCCTCCTCCTGACCCCTGTCCTCTCACATCCGATTTTTGATAACCGTAAGTGGCCGGCTGCAGTAGGGATGAGGGCGGG	chr19	5640242	5640468		8
Inflammation_1	RELA	TXA0447593	RELA_t5_1	AAGGAGTGGGAAGCCTAGACATA	GAGATACTTGCACCACACGAAGA	236	53	AAGGAGTGGGAAGCCTAGACATACCTGAGAGCTGTGGAGTTGGGAGGCAAGAAGGGGCTCTGCTGGAGACACAAAACTAATACCTGAGGCCTCAGCTTCCAGAACCTGGGGATCCAGTGTGTGAAGAAGCGAGACCTGGAGCAAGCCATTAGCCAGCGAATCCAGACCAACAATAACCCCTTTCACGGTAGGAGCAAGGGGCAAAGACATTGATCTTCGTGTGGTGCAAGTATCTC	chr19	5639764	5639999		6
Inflammation_1	chr19	TXA0447590	RELA_t4_3	GCTACACAGGACCAGGAACAG	CTCCTACCCTGCCCTCACA	187	59	GCTACACAGGACCAGGAACAGTTCGAATCTCCCTGGTCACCAAGGATCCACCTCACCGGCCTCATCCACATGAACTTGTGGGGAAGGACTGCCGGGATGGCTACTATGAGGCTGACCTCTGCCCAGACCGCAGTATCCATAGGTGAGTTCCCTATGGGCTGGGGGTGGTGTGAGGGCAGGGTAGGAG	chr19	5638862	5639048		8
Inflammation_1	chr19	TXA0447589	RELA_t4_1	CCCTGTGTCTAAGAGCCAGATTAG	AGGTCAGCCTCATAGTAGCCATC	187	53	CCCTGTGTCTAAGAGCCAGATTAGGGATTGCTGGCCACTAGAGTACTCTGTACTTTGGACAGATCAATGGCTACACAGGACCAGGAACAGTTCGAATCTCCCTGGTCACCAAGGATCCACCTCACCGGCCTCATCCACATGAACTTGTGGGGAAGGACTGCCGGGATGGCTACTATGAGGCTGACCT	chr19	5638793	5638979		1
Inflammation_1	RELA	TXA0447588	RELA_t4_2	AAGAGCCAGATTAGGGATTGCTG	ACCACCCCCAGCCCATAG	228	55	AAGAGCCAGATTAGGGATTGCTGGCCACTAGAGTACTCTGTACTTTGGACAGATCAATGGCTACACAGGACCAGGAACAGTTCGAATCTCCCTGGTCACCAAGGATCCACCTCACCGGCCTCATCCACATGAACTTGTGGGGAAGGACTGCCGGGATGGCTACTATGAGGCTGACCTCTGCCCAGACCGCAGTATCCATAGGTGAGTTCCCTATGGGCTGGGGGTGGT	chr19	5638803	5639030		5
Inflammation_1	RELA	TXA0447587	RELA_t3_2	GATAGCACCTGATGGCTGACTG	CGTTCCACCACATCTGTGTCC	236	58	GATAGCACCTGATGGCTGACTGTGTCACCCACAGAGCCAGCCCAGGCTTCTGGGCCTTATGTGGAGATCATCGAACAGCCGAAGCAACGGGGCATGCGATTCCGCTATAAATGCGAGGGGCGCTCAGCGGGCAGTATTCCTGGCGAGAGAAGCACAGATACCACCAAGACACACCCCACCATCAAGGTAAGCAAGAGCCCCCAGGGGTGTCGCTGGGACACAGATGTGGTGGAACG	chr19	5638517	5638752		7
Inflammation_1	chr19	TXA0447586	RELA_t2_2	CTCAGTTTTCTTGGAAGGGAGGG	CCTGACTACTGAGGATGGATGGT	161	52	CTCAGTTTTCTTGGAAGGGAGGGAGCTTGGCTCTGTCAGGCCTTCGCAGGTGAGGGTGGGCACTGGAGTTTATTGACAATGTGCCTTGTCTTTCCCTTTCAGATCTGTTTCCCCTCATCTTTCCCTCAGGTAAGTTGGACCATCCATCCTCAGTAGTCAGG	chr19	5638330	5638490		2
Inflammation_1	chr19	TXA0447585	RELA_t1_2	CTCTGGCGAATGGCTTTACTTTA	CAGAAAGGGGCGGAAGACG	178	72	CTCTGGCGAATGGCTTTACTTTAGCGCGCCGTGGGCTCAGCTGCGACCCCGGCCCCGCCCCCGGGACCCTGACCATGGACGGTGAGGCTGCCCTCTGGCTCGGGGGATGGCTGCCCTAGAGCTCCGGGGCCTGCGGCGGAATCTCCCCCCTCCCCGCGCCGTCTTCCGCCCCTTTCTG	chr19	5637761	5637938		4
Inflammation_1	RELA	TXA0447584	RELA_t2_1	TTCAGGGTCTTGGCTCAGTTTTC	CAGTCAGCCATCAGGTGCTATC	222	55	TTCAGGGTCTTGGCTCAGTTTTCTTGGAAGGGAGGGAGCTTGGCTCTGTCAGGCCTTCGCAGGTGAGGGTGGGCACTGGAGTTTATTGACAATGTGCCTTGTCTTTCCCTTTCAGATCTGTTTCCCCTCATCTTTCCCTCAGGTAAGTTGGACCATCCATCCTCAGTAGTCAGGGGCTGTCCTGGAGTCGGGGCCGTGGGGATAGCACCTGATGGCTGACTG	chr19	5638317	5638538		3
Inflammation_1	chr11	TXA0439617	TRP53_t11_2	GGAAAGCCCAAACTGCTAGCTC	CTGGTGATGGGGACGGGAT	171	52	GGAAAGCCCAAACTGCTAGCTCCCATCACTTCATCCCTCCCCTTTTCTGTCTTCCTATAGCTACCTGAAGACCAAGAAGGGCCAGTCTACTTCCCGCCATAAAAAAACAATGGTCAAGAAAGTGGGGCCTGACTCAGACTGACTGCCTCTGCATCCCGTCCCCATCACCAG	chr11	69591290	69591460		2
Inflammation_1	chr11	TXA0439616	TRP53_t10_2	TCCCTACCCATAGTAGAAGCCAT	TTTTATGGCGGGAAGTAGACTGG	183	48	TCCCTACCCATAGTAGAAGCCATCTTAAATTCCTTTTTTTCAGCCTCCAGCCTAGAGCCTTCCAAGCCTTGATCAAGGAGGAAAGCCCAAACTGCTAGCTCCCATCACTTCATCCCTCCCCTTTTCTGTCTTCCTATAGCTACCTGAAGACCAAGAAGGGCCAGTCTACTTCCCGCCATAAAA	chr11	69591211	69591393		7
Inflammation_1	chr11	TXA0439615	TRP53_t9_2	ACCTTGTCCAGTGCTTCCA	TGGGTAGAGCACCACAGG	190	57	ACCTTGTCCAGTGCTTCCATCTCACTTCATCTCTGCTGCAGATCCGCGGGCGTAAACGCTTCGAGATGTTCCGGGAGCTGAATGAGGCCTTAGAGTTAAAGGATGCCCATGCTACAGAGGAGTCTGGAGACAGCAGGGCTCACTCCAGGTAAGTGGCCTGGGGCAGCGCCTGCCTGTGGTGCTCTACCCA	chr11	69590615	69590804		6
Inflammation_1	chr11	TXA0439614	TRP53_t8_1	GGAGGAGCCTGTTGAGCTTC	ACAGAGGCAATAATGGGTACAGC	186	54	GGAGGAGCCTGTTGAGCTTCACCCCAAAGTCACCTCTTGCTCTCTCCTTCCACAGCGCTGCCCACCTGCACAAGCGCCTCTCCCCCGCAAAAGAAAAAACCACTTGATGGAGAGTATTTCACCCTCAAGGTACCAAGGCTGGAGAGTCGCATGCCAGAGACAAGCTGTACCCATTATTGCCTCTGT	chr11	69589734	69589919		5
Inflammation_1	TRP53	TXA0439613	TRP53_t8_2	GTTGAGCTTCACCCCAAAGTCA	CACTGAAAAAGACCTGGCAACC	229	50	GTTGAGCTTCACCCCAAAGTCACCTCTTGCTCTCTCCTTCCACAGCGCTGCCCACCTGCACAAGCGCCTCTCCCCCGCAAAAGAAAAAACCACTTGATGGAGAGTATTTCACCCTCAAGGTACCAAGGCTGGAGAGTCGCATGCCAGAGACAAGCTGTACCCATTATTGCCTCTGTCTCTCGCATGTATAAAATAGTGTTATTAGCAGGTTGCCAGGTCTTTTTCAGTG	chr11	69589744	69589972		3
Inflammation_1	chr11	TXA0439610	TRP53_t6_2	TGAGGTAGGGAGCGACTTCAC	AACAGGCTAACCTAACCTACCAC	189	54	TGAGGTAGGGAGCGACTTCACCTGGATCCTGTGTCTTCCCCCAGGCCGGCTCTGAGTATACCACCATCCACTACAAGTACATGTGTAATAGCTCCTGCATGGGGGGCATGAACCGCCGACCTATCCTTACCATCATCACACTGGAAGACTCCAGGTAGGAAGGCGCGTGGTAGGTTAGGTTAGCCTGTT	chr11	69589097	69589285		8
Inflammation_1	chr11	TXA0439607	TRP53_t4_2	AATGTGTTTCATTAGTTCCCCAC	CGGACACGGCTCCCAG	181	57	AATGTGTTTCATTAGTTCCCCACCTTGACACCTGATCGTTACTCGGCTTGTCCCCGACCTCCGTTCTCTCTCCTCTCTTCCAGTACTCTCCTCCCCTCAATAAGCTATTCTGCCAGCTGGCGAAGACGTGCCCTGTGCAGTTGTGGGTCAGCGCCACACCTCCAGCTGGGAGCCGTGTCCG	chr11	69588281	69588461		1
Inflammation_1	chr11	TXA0439606	TRP53_t4_4	GTGCAGTTGTGGGTCAGC	AGCCGGGAGATGGGAG	189	63	GTGCAGTTGTGGGTCAGCGCCACACCTCCAGCTGGGAGCCGTGTCCGCGCCATGGCCATCTACAAGAAGTCACAGCACATGACGGAGGTCGTGAGACGCTGCCCCCACCATGAGCGCTGCTCCGATGGTGATGGTAAGCCCTCAACACCGCCTGTGGGGTTAGGACTGGCAGCCTCCCATCTCCCGGCT	chr11	69588415	69588603		2
Inflammation_1	TRP53	TXA0439605	TRP53_t4_1	CAATGGTGCTTGGACAATGTGTT	TGTGCTGTGACTTCTTGTAGATGG	228	56	CAATGGTGCTTGGACAATGTGTTTCATTAGTTCCCCACCTTGACACCTGATCGTTACTCGGCTTGTCCCCGACCTCCGTTCTCTCTCCTCTCTTCCAGTACTCTCCTCCCCTCAATAAGCTATTCTGCCAGCTGGCGAAGACGTGCCCTGTGCAGTTGTGGGTCAGCGCCACACCTCCAGCTGGGAGCCGTGTCCGCGCCATGGCCATCTACAAGAAGTCACAGCACA	chr11	69588266	69588493		4
Inflammation_1	TRP53	TXA0439604	TRP53_t4_3	CCTCTCTTCCAGTACTCTCCTCC	TGCCAGTCCTAACCCCACAG	234	61	CCTCTCTTCCAGTACTCTCCTCCCCTCAATAAGCTATTCTGCCAGCTGGCGAAGACGTGCCCTGTGCAGTTGTGGGTCAGCGCCACACCTCCAGCTGGGAGCCGTGTCCGCGCCATGGCCATCTACAAGAAGTCACAGCACATGACGGAGGTCGTGAGACGCTGCCCCCACCATGAGCGCTGCTCCGATGGTGATGGTAAGCCCTCAACACCGCCTGTGGGGTTAGGACTGGCA	chr11	69588352	69588585		5
Inflammation_1	chr11	TXA0439603	TRP53_t3_3	GGAGTTTTTTGAAGGCCCAAGTG	CACATAACAGACTTGGCTGTCCC	210	58	GGAGTTTTTTGAAGGCCCAAGTGAAGCCCTCCGAGTGTCAGGAGCTCCTGCAGCACAGGACCCTGTCACCGAGACCCCTGGGCCAGTGGCCCCTGCCCCAGCCACTCCATGGCCCCTGTCATCTTTTGTCCCTTCTCAAAAAACTTACCAGGGCAACTATGGCTTCCACCTGGGCTTCCTGCAGTCTGGGACAGCCAAGTCTGTTATGTG	chr11	69587419	69587628		6
Inflammation_1	chr11	TXA0439602	TRP53_t3_5	GCCCCAGCCACTCCAT	CCAAATCTAGACAGAGAAAAAGAGGC	189	53	GCCCCAGCCACTCCATGGCCCCTGTCATCTTTTGTCCCTTCTCAAAAAACTTACCAGGGCAACTATGGCTTCCACCTGGGCTTCCTGCAGTCTGGGACAGCCAAGTCTGTTATGTGCACGGTGAGTGGGCCCCGGGGAGTTGTCTTTCGTGTGACCTTTCAATGCCTCTTTTTCTCTGTCTAGATTTGG	chr11	69587513	69587701		2
Inflammation_1	chr11	TXA0439601	TRP53_t3_1	GCTTTGGTGTTGGGCTGGTAG	GGGTCTCGGTGACAGGGT	189	57	GCTTTGGTGTTGGGCTGGTAGGCTGAGAACACAGTCCTGAGGGTTCTTCTTTGTCCCATCCACAGCCATCACCTCACTGCATGGACGATCTGTTGCTGCCCCAGGATGTTGAGGAGTTTTTTGAAGGCCCAAGTGAAGCCCTCCGAGTGTCAGGAGCTCCTGCAGCACAGGACCCTGTCACCGAGACCC	chr11	69587307	69587495		7
Inflammation_1	chr11	TXA0439600	TRP53_t2_1	TCATTGACTACATAGCAAGTTGGAGG	CCAAAGCCCAAGTCCCTTTCT	161	46	tcattgactacatagcaagttggaggccagcctgggataagtgagattctgtcttcaaaaaaTGGAAGGAAATCAGGAACTAACTCTCTGCTCTTGTTTTCCAGACTTCCTCCAGAAGATATCCTGGTAAGGCCCAGAGCAGAAAGGGACTTGGGCTTTGG	chr11	69587153	69587313	One primer sits in the repeat region	3
Inflammation_1	chr11	TXA0439599	TRP53_t1_2	GCCATAGGGGTTTGTTTGTTTGT	ACAGGTATGGCGGGATGTATCTT	212	45	gccataggggtttgtttgtttgtatgttttttaattgacaagttatgcatccatacagtacacaatctcttctctctacaGATGACTGCCATGGAGGAGTCACAGTCGGATATCAGCCTCGAGCTCCCTCTGAGCCAGGAGACATTTTCAGGCTTATGGAAACTGTGAGTGGATCTTTTTGGGGCCCTTAAGATACATCCCGCCATACCTGT	chr11	69586810	69587021	One primer sits in the repeat region	6
Inflammation_1	chr18	TXA0439596	APC_t1_3	AAGCAAGTTGAGGCACTGAAGAT	ACAAGAGGAAACACTGAAAGTGGA	161	38	AAGCAAGTTGAGGCACTGAAGATGGAGAACTCAAATCTTCGACAAGAGCTAGAAGATAATTCCAATCATCTTACAAAACTGGAAACTGAGGCATCTAATATGAAGGTATCAAGACTGCAACTTCTAATTGTAGCTTATCCACTTTCAGTGTTTCCTCTTGT	chr18	34261053	34261213		3
Inflammation_1	chr18	TXA0439595	APC_t1_2	AACCTTATAGGTCCAAGGGTAGC	AGTTGCAGTCTTGATACCTTCAT	180	41	AACCTTATAGGTCCAAGGGTAGCCAAGGATGGCTGCAGCTTCATATGATCAGTTGTTAAAGCAAGTTGAGGCACTGAAGATGGAGAACTCAAATCTTCGACAAGAGCTAGAAGATAATTCCAATCATCTTACAAAACTGGAAACTGAGGCATCTAATATGAAGGTATCAAGACTGCAACT	chr18	34260995	34261174		2
Inflammation_1	chr9	TXA0439594	CTNNB1_t14_3	CTTGGGGATGGACCCTATGATG	AGTATTCACCCACACTGGCTTTT	212	53	CTTGGGGATGGACCCTATGATGGAGCATGAGATGGGTGGCCACCACCCTGGTGCTGACTATCCAGTTGATGGGCTGCCTGATCTGGGACACGCCCAGGACCTCATGGATGGGCTGCCCCCAGGTGATAGCAATCAGCTGGCCTGGTTTGATACTGACCTGTAAATCGTCCTTTAGGTAAGAAAGCTTATAAAAGCCAGTGTGGGTGAATACT	chr9	120959355	120959566		8
Inflammation_1	chr9	TXA0439593	CTNNB1_t14_1	TCAGTCTCTCCTCTTTCCTTTGC	CAGATCAGGCAGCCCATCAAC	183	55	TCAGTCTCTCCTCTTTCCTTTGCCCATCTTGTGGACACCCTGACTCCTACAGATCCCAGCTACCGTTCTTTTCACTCTGGTGGATACGGCCAGGATGCCTTGGGGATGGACCCTATGATGGAGCATGAGATGGGTGGCCACCACCCTGGTGCTGACTATCCAGTTGATGGGCTGCCTGATCTG	chr9	120959257	120959439		3
Inflammation_1	APC	TXA0439592	APC_t1_1	AGCTACTCCATTCTTAGTGGTGAAT	GTGGATAAGCTACAATTAGAAGTTGC	240	39	AGCTACTCCATTCTTAGTGGTGAATTTCAAAATCCTTTTTAACCTTATAGGTCCAAGGGTAGCCAAGGATGGCTGCAGCTTCATATGATCAGTTGTTAAAGCAAGTTGAGGCACTGAAGATGGAGAACTCAAATCTTCGACAAGAGCTAGAAGATAATTCCAATCATCTTACAAAACTGGAAACTGAGGCATCTAATATGAAGGTATCAAGACTGCAACTTCTAATTGTAGCTTATCCAC	chr18	34260955	34261194		5
Inflammation_1	CTNNB1	TXA0439591	CTNNB1_t14_4	CCTATGATGGAGCATGAGATGGG	ACCAAGTCTTTCTGGAGTTCTGC	233	52	CCTATGATGGAGCATGAGATGGGTGGCCACCACCCTGGTGCTGACTATCCAGTTGATGGGCTGCCTGATCTGGGACACGCCCAGGACCTCATGGATGGGCTGCCCCCAGGTGATAGCAATCAGCTGGCCTGGTTTGATACTGACCTGTAAATCGTCCTTTAGGTAAGAAAGCTTATAAAAGCCAGTGTGGGTGAATACTTTACTCTGCCTGCAGAACTCCAGAAAGACTTGGT	chr9	120959368	120959600		5
Inflammation_1	CTNNB1	TXA0439590	CTNNB1_t14_2	CCTCTTTCCTTTGCCCATCTTGT	ATCAAACCAGGCCAGCTGATTG	240	57	CCTCTTTCCTTTGCCCATCTTGTGGACACCCTGACTCCTACAGATCCCAGCTACCGTTCTTTTCACTCTGGTGGATACGGCCAGGATGCCTTGGGGATGGACCCTATGATGGAGCATGAGATGGGTGGCCACCACCCTGGTGCTGACTATCCAGTTGATGGGCTGCCTGATCTGGGACACGCCCAGGACCTCATGGATGGGCTGCCCCCAGGTGATAGCAATCAGCTGGCCTGGTTTGAT	chr9	120959266	120959505		6
Inflammation_1	chr9	TXA0439589	CTNNB1_t13_2	GCAGTTTGAGGTGTTTGTCTTCT	GCGTGGACAAGGGCTTTATGA	181	44	GCAGTTTGAGGTGTTTGTCTTCTGTGATCTTATGTTTATAAACACTCAGGTGTGGTTTTGAAATTTTATGTCCTTCTTGTACCCATTTATATAGACTGCAGATCTTGGACTGGACATTGGTGCCCAGGGAGAAGCCCTTGGATATCGCCAGGATGGTATGTCATAAAGCCCTTGTCCACGC	chr9	120958498	120958678		2
Inflammation_1	CTNNB1	TXA0439588	CTNNB1_t13_1	ATGCTACATGCAGTTTGAGGTGT	GCATGTTTAAGTGCAGCCACCA	234	45	ATGCTACATGCAGTTTGAGGTGTTTGTCTTCTGTGATCTTATGTTTATAAACACTCAGGTGTGGTTTTGAAATTTTATGTCCTTCTTGTACCCATTTATATAGACTGCAGATCTTGGACTGGACATTGGTGCCCAGGGAGAAGCCCTTGGATATCGCCAGGATGGTATGTCATAAAGCCCTTGTCCACGCCTGGAACCTGGGTTGGAAGAAGTGGTGGCTGCACTTAAACATGC	chr9	120958489	120958722		7
Inflammation_1	chr9	TXA0439587	CTNNB1_t12_2	GGCCTCAAGGGCTAGTTTCTTTT	AATGCTGGCCTACCTCATTCCAA	168	50	GGCCTCAAGGGCTAGTTTCTTTTTTTATTCCAGCAACATACGCAGCTGCTGTCCTATTCCGAATGTCTGAGGACAAGCCACAGGATTACAAGAAGCGGCTTTCAGTCGAGCTGACCAGTTCCCTCTTCAGGACAGAGCCAATGGCTTGGAATGAGGTAGGCCAGCATT	chr9	120957726	120957893		3
Inflammation_1	chr9	TXA0439586	CTNNB1_t12_3	GAGGACAAGCCACAGGATTACAA	TCTCACCTATGCTCCTTTGAGTG	185	54	GAGGACAAGCCACAGGATTACAAGAAGCGGCTTTCAGTCGAGCTGACCAGTTCCCTCTTCAGGACAGAGCCAATGGCTTGGAATGAGGTAGGCCAGCATTGCACAAGTCAGTGCGTTCACTGCGCTCTTAACTCCAGCTAGCATGAGCACCGTCTCCCTCAGCACTCAAAGGAGCATAGGTGAGA	chr9	120957794	120957978		1
Inflammation_1	CTNNB1	TXA0439585	CTNNB1_t12_1	CCAGTCCCATTAGTTGCCTGTG	TGAACGCACTGACTTGTGCAAT	231	52	CCAGTCCCATTAGTTGCCTGTGCACTGGGCCTAGGCATGGGCCTGGCCTCAAGGGCTAGTTTCTTTTTTTATTCCAGCAACATACGCAGCTGCTGTCCTATTCCGAATGTCTGAGGACAAGCCACAGGATTACAAGAAGCGGCTTTCAGTCGAGCTGACCAGTTCCCTCTTCAGGACAGAGCCAATGGCTTGGAATGAGGTAGGCCAGCATTGCACAAGTCAGTGCGTTCA	chr9	120957682	120957912		2
Inflammation_1	chr9	TXA0439584	CTNNB1_t11_3	ATATCCAAAGAGTAGCTGCAGGG	GCCAGGCCCATGCCTA	190	58	ATATCCAAAGAGTAGCTGCAGGGGTCCTCTGTGAACTTGCTCAGGACAAGGAGGCTGCAGAGGCCATTGAAGCTGAGGGAGCCACAGCTCCCCTGACAGAGTTACTCCACTCCAGGAATGAAGGCGTGGGTAAGCTGAGGAGCCCAGTCCCATTAGTTGCCTGTGCACTGGGCCTAGGCATGGGCCTGGC	chr9	120957539	120957728		7
Inflammation_1	chr9	TXA0439583	CTNNB1_t11_2	GCTTTACATTGGGTTTAATTAGGTCT	TGGAGTAACTCTGTCAGGGGAG	179	47	GCTTTACATTGGGTTTAATTAGGTCTTGTTTCTGTGTTTTCTCCATAGTTGCTTTATTCTCCCATTGAAAATATCCAAAGAGTAGCTGCAGGGGTCCTCTGTGAACTTGCTCAGGACAAGGAGGCTGCAGAGGCCATTGAAGCTGAGGGAGCCACAGCTCCCCTGACAGAGTTACTCCA	chr9	120957469	120957647		5
Inflammation_1	CTNNB1	TXA0439582	CTNNB1_t11_1	ACACGTCATGCTTTACATTGGGT	CAACTAATGGGACTGGGCTCC	238	49	ACACGTCATGCTTTACATTGGGTTTAATTAGGTCTTGTTTCTGTGTTTTCTCCATAGTTGCTTTATTCTCCCATTGAAAATATCCAAAGAGTAGCTGCAGGGGTCCTCTGTGAACTTGCTCAGGACAAGGAGGCTGCAGAGGCCATTGAAGCTGAGGGAGCCACAGCTCCCCTGACAGAGTTACTCCACTCCAGGAATGAAGGCGTGGGTAAGCTGAGGAGCCCAGTCCCATTAGTTG	chr9	120957460	120957697		4
Inflammation_1	CTNNB1	TXA0439579	CTNNB1_t10_1	ACAGTGCACATAAGTGGCTACAA	TCAATGTCTAGGGACTCAAGTCTG	238	52	ACAGTGCACATAAGTGGCTACAACTGCTGCTCAGAGAGTGCCAGCTTAACTGCTTTTCTCCTCCTAGGAGGGCGTGCGCATGGAGGAGATAGTAGAAGGGTGTACTGGAGCTCTCCACATCCTTGCTCGGGACGTTCACAACCGGATTGTAATCCGAGGACTCAATACCATTCCATTGTTTGTGCAGGTACGTCGGCTTCAGGTGACTGCTCTCCAGACTTGAGTCCCTAGACATTGA	chr9	120957040	120957277		6
Inflammation_1	chr9	TXA0439578	CTNNB1_t9_1	CACTCAACACTGCTTGTGCTTTG	GTTGGGTGTCCTGATGTGCTC	175	49	CACTCAACACTGCTTGTGCTTTGTTGTGTTGTCTACTGATTCTTTCCTCTGTAGGCAACTGTTGGATTGATTCGAAACCTTGCCCTTTGCCCAGCAAATCATGCGCCTTTGCGGGAACAGGGTGCTATTCCACGACTAGTTCAGCTGCTTGTACGAGCACATCAGGACACCCAAC	chr9	120955760	120955934		5
Inflammation_1	chr9	TXA0439577	CTNNB1_t9_3	CCAGCAAATCATGCGCCTTTG	ATGGAGATTGCATTTACCCCACC	184	52	CCAGCAAATCATGCGCCTTTGCGGGAACAGGGTGCTATTCCACGACTAGTTCAGCTGCTTGTACGAGCACATCAGGACACCCAACGGCGCACCTCCATGGGTGGAACGCAGCAGCAGTTTGTGGTAGGTAGATCTTTATGAAACATGGCTGTTGTAAATGGGGTGGGGTAAATGCAATCTCCAT	chr9	120955850	120956033		7
Inflammation_1	CTNNB1	TXA0439576	CTNNB1_t9_2	CTTGTGCTTTGTTGTGTTGTCT	CCCATTTACAACAGCCATGTTTC	240	50	CTTGTGCTTTGTTGTGTTGTCTACTGATTCTTTCCTCTGTAGGCAACTGTTGGATTGATTCGAAACCTTGCCCTTTGCCCAGCAAATCATGCGCCTTTGCGGGAACAGGGTGCTATTCCACGACTAGTTCAGCTGCTTGTACGAGCACATCAGGACACCCAACGGCGCACCTCCATGGGTGGAACGCAGCAGCAGTTTGTGGTAGGTAGATCTTTATGAAACATGGCTGTTGTAAATGGG	chr9	120955772	120956011		3
Inflammation_1	chr9	TXA0439575	CTNNB1_t8_6	GACATCACTGAGCCTGCCATC	CACCTATTCCCAGCCATCCATC	220	55	GACATCACTGAGCCTGCCATCTGTGCTCTTCGTCATCTGACCAGCCGGCATCAGGAAGCCGAGATGGCCCAGAATGCCGTTCGCCTTCATTATGGACTGCCTGTTGTGGTTAAACTCCTGCACCCACCATCCCACTGGCCTCTGATAAAGGTGAACTGTTAGCAGGGAGCTCTGTTGGGCATAGAGATGGTCTGCTGGGATGGATGGCTGGGAATAGGTG	chr9	120955518	120955737		6
Inflammation_1	chr9	TXA0439574	CTNNB1_t8_2	GCCTTGGCACTAGGGTCTG	CTCTATGCCACCCACTTGGC	206	48	GCCTTGGCACTAGGGTCTGCATGAGCTCTGAGCTCATCATGTTTTTCTCTCAACAGGAAGGGATGGAAGGCCTCCTTGGGACTCTAGTGCAGCTTCTGGGTTCCGATGATATAAATGTGGTCACCTGTGCAGCTGGAATTCTCTCTAACCTCACTTGCAATAATTACAAAAACAAGATGATGGTGTGCCAAGTGGGTGGCATAGAG	chr9	120955273	120955478		8
Inflammation_1	chr9	TXA0439573	CTNNB1_t8_3	TGATATAAATGTGGTCACCTGTGC	AACGGCATTCTGGGCCATC	220	51	TGATATAAATGTGGTCACCTGTGCAGCTGGAATTCTCTCTAACCTCACTTGCAATAATTACAAAAACAAGATGATGGTGTGCCAAGTGGGTGGCATAGAGGCTCTTGTACGCACCGTCCTTCGTGCTGGTGACAGGGAAGACATCACTGAGCCTGCCATCTGTGCTCTTCGTCATCTGACCAGCCGGCATCAGGAAGCCGAGATGGCCCAGAATGCCGTT	chr9	120955379	120955598		2
Inflammation_1	CTNNB1	TXA0439572	CTNNB1_t8_5	CTCTTGTACGCACCGTCCTTC	CAGACCATCTCTATGCCCAACAG	232	55	CTCTTGTACGCACCGTCCTTCGTGCTGGTGACAGGGAAGACATCACTGAGCCTGCCATCTGTGCTCTTCGTCATCTGACCAGCCGGCATCAGGAAGCCGAGATGGCCCAGAATGCCGTTCGCCTTCATTATGGACTGCCTGTTGTGGTTAAACTCCTGCACCCACCATCCCACTGGCCTCTGATAAAGGTGAACTGTTAGCAGGGAGCTCTGTTGGGCATAGAGATGGTCTG	chr9	120955480	120955711		4
Inflammation_1	CTNNB1	TXA0439571	CTNNB1_t8_1	AAACCTTTCAGATGCAGCGACTA	TGGCACACCATCATCTTGTTTTT	239	46	AAACCTTTCAGATGCAGCGACTAAGCAGGTATATTGTACACAAGTTGCTGCCTTGGCACTAGGGTCTGCATGAGCTCTGAGCTCATCATGTTTTTCTCTCAACAGGAAGGGATGGAAGGCCTCCTTGGGACTCTAGTGCAGCTTCTGGGTTCCGATGATATAAATGTGGTCACCTGTGCAGCTGGAATTCTCTCTAACCTCACTTGCAATAATTACAAAAACAAGATGATGGTGTGCCA	chr9	120955224	120955462		3
Inflammation_1	CTNNB1	TXA0439570	CTNNB1_t8_4	TGCAGCTGGAATTCTCTCTAACC	TTTAACCACAACAGGCAGTCCAT	232	51	TGCAGCTGGAATTCTCTCTAACCTCACTTGCAATAATTACAAAAACAAGATGATGGTGTGCCAAGTGGGTGGCATAGAGGCTCTTGTACGCACCGTCCTTCGTGCTGGTGACAGGGAAGACATCACTGAGCCTGCCATCTGTGCTCTTCGTCATCTGACCAGCCGGCATCAGGAAGCCGAGATGGCCCAGAATGCCGTTCGCCTTCATTATGGACTGCCTGTTGTGGTTAAA	chr9	120955400	120955631		1
Inflammation_1	CTNNB1	TXA0439567	CTNNB1_t7_1	AAAGTTCTCAGAGTTGGGACACC	AGAGCTCATGCAGACCCTAGT	218	50	AAAGTTCTCAGAGTTGGGACACCATGAGGGCTAACAGGCCTGCCTTTGATGTCTGACTTTGCAGGTGGGATGCAGGCACTGGGGCTTCATCTGACAGACCCAAGTCAGCGACTTGTTCAAAACTGTCTTTGGACTCTCAGAAACCTTTCAGATGCAGCGACTAAGCAGGTATATTGTACACAAGTTGCTGCCTTGGCACTAGGGTCTGCATGAGCTCT	chr9	120955084	120955301		7
Inflammation_1	chr9	TXA0439566	CTNNB1_t6_1	CCGGTAACTCAGTGATGAATGGC	CTTCAGCACTCTGCTTGTGGTC	165	48	ccggtaactcagtgatgaatggcactgttctctagcctcatgacttacagttccatctctctctagctcatcattctggccagTGGTGGACCCCAAGCCTTAGTAAACATAATGAGGACCTACACTTATGAGAAGCTTCTGTGGACCACAAGCAGAGTGCTGAAG	chr9	120952793	120952957	One primer sits in the repeat region	6
Inflammation_1	chr9	TXA0439565	CTNNB1_t6_3	GGACCCCAAGCCTTAGTAAACAT	TAAGTAACATGGGGCAAGCAAAC	183	48	GGACCCCAAGCCTTAGTAAACATAATGAGGACCTACACTTATGAGAAGCTTCTGTGGACCACAAGCAGAGTGCTGAAGGTGCTGTCTGTCTGCTCTAGCAACAAGCCGGCCATTGTAGAAGCTGGTGAGTACACACATTCTGAGATCACTCACAGTACTTGTTTGCTTGCCCCATGTTACTTA	chr9	120952880	120953062		8
Inflammation_1	chr9	TXA0439564	CTNNB1_t6_2	TGATGAATGGCACTGTTCTCT	CAAACAAGTACTGTGAGTGATCT	240	48	tgatgaatggcactgttctctagcctcatgacttacagttccatctctctctagctcatcattctggccagTGGTGGACCCCAAGCCTTAGTAAACATAATGAGGACCTACACTTATGAGAAGCTTCTGTGGACCACAAGCAGAGTGCTGAAGGTGCTGTCTGTCTGCTCTAGCAACAAGCCGGCCATTGTAGAAGCTGGTGAGTACACACATTCTGAGATCACTCACAGTACTTGTTTG	chr9	120952805	120953044	One primer sits in the repeat region	4
Inflammation_1	chr9	TXA0439563	CTNNB1_t5_2	GTAGAAGGGTGCTGGCATGG	TGTTGAGCAAAGCAACCATTTTC	173	51	GTAGAAGGGTGCTGGCATGGCTAACAAAGGCTCTCCTCTTCCCAGGTCACCAGTGGATTCTGTACTGTTCTACGCCATCACGACACTGCATAATCTCCTGCTCCATCAGGAAGGAGCTAAAATGGCAGTGCGCCTAGCTGGTGGACTGCAGAAAATGGTTGCTTTGCTCAACA	chr9	120951541	120951713		4
Inflammation_1	chr9	TXA0439562	CTNNB1_t5_4	TCCATCAGGAAGGAGCTAAAATGG	ACTCCACACTCTGTACAAACAACT	183	44	TCCATCAGGAAGGAGCTAAAATGGCAGTGCGCCTAGCTGGTGGACTGCAGAAAATGGTTGCTTTGCTCAACAAAACAAACGTGAAATTCTTGGCTATTACAACAGACTGCCTTCAGATCTTAGCTTATGGCAATCAAGAGAGCAAGGTAGAGTGATGAAAGTTGTTTGTACAGAGTGTGGAGT	chr9	120951642	120951824		8
Inflammation_1	CTNNB1	TXA0439561	CTNNB1_t5_3	ATCACGACACTGCATAATCTCCT	CGCGCACATGCATACTAAGAAC	236	44	ATCACGACACTGCATAATCTCCTGCTCCATCAGGAAGGAGCTAAAATGGCAGTGCGCCTAGCTGGTGGACTGCAGAAAATGGTTGCTTTGCTCAACAAAACAAACGTGAAATTCTTGGCTATTACAACAGACTGCCTTCAGATCTTAGCTTATGGCAATCAAGAGAGCAAGGTAGAGTGATGAAAGTTGTTTGTACAGAGTGTGGAGTTACTAAGTTCTTAGTATGCATGTGCGCG	chr9	120951617	120951852		1
Inflammation_1	CTNNB1	TXA0439560	CTNNB1_t5_1	AGGGAACTTGAAGGGTAGGAAGT	AGGCAGTCTGTTGTAATAGCCAA	234	49	AGGGAACTTGAAGGGTAGGAAGTAGAAGGGTGCTGGCATGGCTAACAAAGGCTCTCCTCTTCCCAGGTCACCAGTGGATTCTGTACTGTTCTACGCCATCACGACACTGCATAATCTCCTGCTCCATCAGGAAGGAGCTAAAATGGCAGTGCGCCTAGCTGGTGGACTGCAGAAAATGGTTGCTTTGCTCAACAAAACAAACGTGAAATTCTTGGCTATTACAACAGACTGCCT	chr9	120951520	120951753		7
Inflammation_1	chr9	TXA0439559	CTNNB1_t4_3	ATCATGCGCTCCCCTCAGAT	ACTTCCTACCCTTCAAGTTCCCT	210	52	ATCATGCGCTCCCCTCAGATGGTGTCTGCCATTGTACGCACCATGCAGAATACAAATGATGTAGAGACAGCTCGTTGTACTGCTGGGACTCTGCACAACCTTTCTCACCACCGCGAGGGCTTGCTGGCCATCTTTAAGTCTGGTGGCATCCCAGCGCTGGTGAAAATGCTTGGGTAAGAGAATGGCCAGGGAACTTGAAGGGTAGGAAGT	chr9	120951333	120951542		5
Inflammation_1	chr9	TXA0439558	CTNNB1_t4_2	CAATGGCTGCCTCACACTAA	GCAGAGTCCCAGCAGTACAAC	220	46	CAATGGCTGCCTCACACTAAGTTTTGGAAACTAATGGTGCCTCTTCATCCTTTATTCTAGGTGGTAGTTAATAAAGCTGCTGTTATGGTCCATCAGCTTTCCAAAAAGGAAGCTTCCAGACATGCCATCATGCGCTCCCCTCAGATGGTGTCTGCCATTGTACGCACCATGCAGAATACAAATGATGTAGAGACAGCTCGTTGTACTGCTGGGACTCTGC	chr9	120951207	120951426		6
Inflammation_1	chr9	TXA0439556	CTNNB1_t3_1	GGGTAGCGGAGTCCCACAT	ACATCTGTGATGGTTCAGCCAAG	203	53	GGGTAGCGGAGTCCCACATGCCTAGTGAGTGTTGGATTTACCTTTTTCAGATATTGACGGGCAGTATGCAATGACTAGGGCTCAGAGGGTCCGAGCTGCCATGTTCCCTGAGACGCTAGATGAGGGCATGCAGATCCCATCCACGCAGTTTGACGCTGCTCATCCCACTAATGTCCAGCGCTTGGCTGAACCATCACAGATGT	chr9	120950844	120951046		2
Inflammation_1	CTNNB1	TXA0439554	CTNNB1_t4_4	CTCAGATGGTGTCTGCCATTGTA	GGGAAGAGGAGAGCCTTTGTTAG	238	53	CTCAGATGGTGTCTGCCATTGTACGCACCATGCAGAATACAAATGATGTAGAGACAGCTCGTTGTACTGCTGGGACTCTGCACAACCTTTCTCACCACCGCGAGGGCTTGCTGGCCATCTTTAAGTCTGGTGGCATCCCAGCGCTGGTGAAAATGCTTGGGTAAGAGAATGGCCAGGGAACTTGAAGGGTAGGAAGTAGAAGGGTGCTGGCATGGCTAACAAAGGCTCTCCTCTTCCC	chr9	120951346	120951583		2
Inflammation_1	CTNNB1	TXA0439553	CTNNB1_t4_1	GAAGTTCTCAAGGGGATGCCAAT	GTACAACGAGCTGTCTCTACATCA	225	46	GAAGTTCTCAAGGGGATGCCAATGGCTGCCTCACACTAAGTTTTGGAAACTAATGGTGCCTCTTCATCCTTTATTCTAGGTGGTAGTTAATAAAGCTGCTGTTATGGTCCATCAGCTTTCCAAAAAGGAAGCTTCCAGACATGCCATCATGCGCTCCCCTCAGATGGTGTCTGCCATTGTACGCACCATGCAGAATACAAATGATGTAGAGACAGCTCGTTGTAC	chr9	120951188	120951412		3
Inflammation_1	CTNNB1	TXA0439552	CTNNB1_t3_2	AGTCCCACATGCCTAGTGAGT	TCCGCGTCATCCTGATAGTTAAT	240	50	AGTCCCACATGCCTAGTGAGTGTTGGATTTACCTTTTTCAGATATTGACGGGCAGTATGCAATGACTAGGGCTCAGAGGGTCCGAGCTGCCATGTTCCCTGAGACGCTAGATGAGGGCATGCAGATCCCATCCACGCAGTTTGACGCTGCTCATCCCACTAATGTCCAGCGCTTGGCTGAACCATCACAGATGTTGAAACATGCAGTTGTCAATTTGATTAACTATCAGGATGACGCGGA	chr9	120950853	120951092		7
Inflammation_1	CTNNB1	TXA0439551	CTNNB1_t3_3	GATCCCATCCACGCAGTTTGAC	CATTGGCATCCCCTTGAGAACT	236	47	GATCCCATCCACGCAGTTTGACGCTGCTCATCCCACTAATGTCCAGCGCTTGGCTGAACCATCACAGATGTTGAAACATGCAGTTGTCAATTTGATTAACTATCAGGATGACGCGGAACTTGCCACACGTGCAATTCCTGAGCTGACAAAACTGCTAAACGATGAGGACCAGGTAAGCAGTGATGTAACTTGCTTTTCAGTTTACTTTGAGGGAAGTTCTCAAGGGGATGCCAATG	chr9	120950976	120951211		1
Inflammation_1	chr9	TXA0439550	CTNNB1_t1_2	TGACTTGATGGAATTTTTCAGGGT	TGTGCAGAAGGGAAGAGAACAAA	168	53	TGACTTGATGGAATTTTTCAGGGTACCTGAAGCTCAGCGCACAGCTGCTGTGACACCGCTGCGTGGACAATGGCTACTCAAGGTTTGTGATTCAGATGCCTGTCTGAGGATCTGCCTCATAGCCCTGCTGCCTGGCCAGACTGCCTTTGTTCTCTTCCCTTCTGCACA	chr9	120950152	120950319		4
Inflammation_1	CTNNB1	TXA0439549	CTNNB1_t1_1	AATCACGGTGACCTGGGTTAAAA	GCTGATTATTTCACCAAGCCAGT	236	49	AATCACGGTGACCTGGGTTAAAAACAAACTTAAGTTTTAATGACTTGATGGAATTTTTCAGGGTACCTGAAGCTCAGCGCACAGCTGCTGTGACACCGCTGCGTGGACAATGGCTACTCAAGGTTTGTGATTCAGATGCCTGTCTGAGGATCTGCCTCATAGCCCTGCTGCCTGGCCAGACTGCCTTTGTTCTCTTCCCTTCTGCACACTACCACTGGCTTGGTGAAATAATCAGC	chr9	120950112	120950347		1
Inflammation_1	chr6	TXA0439548	KRAS_t3_3	CCGTAACTCCTTGCTAACTCCT	GTTGAGGGCAAGGTTTGAAGTAT	190	42	CCGTAACTCCTTGCTAACTCCTGAGCCTGTTTCGTGTCTACTGTTCTAGAAGGCAAATCACACTTATTCCCTACCAGGACCATAGGCACATCTTCAGAGTCCTTTACTCTTTTAATTTGTTCTCTGGGGAAGAAACAAAGTGAAGCAGAAGCATAAGTAACACAAAAATACTTCAAACCTTGCCCTCAAC	chr6	145232132	145232321		5
Inflammation_1	chr6	TXA0439547	KRAS_t3_1	CAATGACGAACACCATCTGGAGC	GCCTATGGTCCTGGTAGGGAATA	189	49	CAATGACGAACACCATCTGGAGCACCAAGCAGAGCACAGACTCACGTCTGTCCAGTTGTACTCACCTGTCTTGTCTTTGCTGAGGTCTCAATGAACGGAATCCCGTAACTCCTTGCTAACTCCTGAGCCTGTTTCGTGTCTACTGTTCTAGAAGGCAAATCACACTTATTCCCTACCAGGACCATAGGC	chr6	145232030	145232218		4
Inflammation_1	APC	TXA0429269	APC_t16_70	CGTCATCCGACTCAGATTCCATT	AATTGGAGCGAATCTTTCCCGTA	237	40	CGTCATCCGACTCAGATTCCATTCTGTCACTAAAGTCCGGCATTTCTCTGGGATCGCCTTTTCATCTTACACCTGATCAAGAGGAAAAGCCATTCACAAGCAATAAAGGCCCAAGAATTCTCAAACCTGGAGAGAAAAGCACATTAGAAGCAAAAAAAATAGAATCTGAAAACAAAGGAATCAAAGGCGGGAAAAAGGTTTATAAAAGCTTGATTACGGGAAAGATTCGCTCCAATT	chr18	34316435	34316671		7
Inflammation_1	chr18	TXA0429257	APC_t16_79	ACCTACACAGCAACCATTAAGTA	GCATTCTTGGATAAACTTGCTTG	231	46	ACCTACACAGCAACCATTAAGTAGGCCAATGCAGTCTCCAGGGCGAAACTCAATTTCCCCTGGTAGAAATGGAATAAGCCCTCCTAACAAACTGTCTCAGCTGCCCAGAACATCATCTCCCAGTACTGCTTCAACTAAGTCCTCCGGTTCTGGGAAAATGTCATATACATCCCCAGGTAGACAGCTGAGCCAACAAAATCTTACCAAACAAGCAAGTTTATCCAAGAATGC	chr18	34316985	34317215		7
Inflammation_1	APC	TXA0429250	APC_t11_2	GGACTGTAGACTAGGACTGACACA	GAATGTGAAGGCGAGGAGTGA	224	52	GGACTGTAGACTAGGACTGACACATTAATTATCTGAATTTGAGAATAAAACTTAGACTCAGTATTTGTTCCTCTTCTTCTTCAGGTAGGAAGGCTACCCGGGGCATTTCATCCCAGGAGCTAGGTCAGGGGCTTTCAGGTGAGGAGCAGGATGGGGCCTCTGGGGGCGTGGCTGTGGGACGCAGCCACAGGGTGACCTTCCTCTCACTCCTCGCCTTCACATTC	chr18	34301178	34301401		1
Inflammation_1	CTNNB1	TXA0411531	CTNNB1_t2_5	GCAGCAGCAGTCTTACTTGGATT	ACACAGCCCTGTCAAGAAACTTA	219	50	GCAGCAGCAGTCTTACTTGGATTCTGGAATCCATTCTGGTGCCACCACCACAGCTCCTTCCCTGAGTGGCAAGGGCAACCCTGAGGAAGAAGATGTTGACACCTCCCAAGTCCTTTATGAATGGGAGCAAGGCTTTTCCCAGTCCTTCACGCAAGAGCAAGTAGCTGGTAAAGCATTTGTGTTTGGAAGCTAGCATTAAGTTTCTTGACAGGGCTGTGT	chr9	120950583	120950801		4
Inflammation_1	chr6	TXA0411529	Braf_2_2	GAAGAGCCCAACTACCTCTGAAC	CCTGCCCCTCTCTTTCTCTTCTA	162	54	GAAGAGCCCAACTACCTCTGAACACTGGGCCAGGCTCAAAATCAAACACTATTTCACTGGGGACAGAATGGAGGAGGGGGCTGGGAGTCCGGGATTGGTATTTCCGAAGACAGCGCATCAGTTGGTTCAAGGGGGCTGTTAGAAGAGAAAGAGAGGGGCAGG	chr6	39646710	39646871		6
Inflammation_1	Braf	TXA0411528	Braf_2_1	TTAGTTTGCTTGGGTGAGAACAA	TTCTGTGTGTCTGTCTTCCTGTG	216	50	TTAGTTTGCTTGGGTGAGAACAAGAAAGAAGAGCCCAACTACCTCTGAACACTGGGCCAGGCTCAAAATCAAACACTATTTCACTGGGGACAGAATGGAGGAGGGGGCTGGGAGTCCGGGATTGGTATTTCCGAAGACAGCGCATCAGTTGGTTCAAGGGGGCTGTTAGAAGAGAAAGAGAGGGGCAGGCAAACACAGGAAGACAGACACACAGAA	chr6	39646683	39646898		4
Inflammation_1	chr6	TXA0411527	Braf_1_2	TACCTCCTCAATTCTTACCATCCAC	TTCCTTTACTTACTGCACCTCAGATA	160	42	TACCTCCTCAATTCTTACCATCCACAAAATAGATCCAGACAACTGTTCAAACTGATGGGACCCACTCCACCGAGATTTCACTGTGGCTAGACCAAAGTCACCTATTTTTACCGTGAGGTCTTCATGAAGAAATATATCTGAGGTGCAGTAAGTAAAGGAA	chr6	39627704	39627863		3
Inflammation_1	Braf	TXA0411526	Braf_1_1	TGTGACCAACTGAGATACCTCCT	ACCTGAAATCTTCAAAATGCTTTCTC	232	38	TGTGACCAACTGAGATACCTCCTCAATTCTTACCATCCACAAAATAGATCCAGACAACTGTTCAAACTGATGGGACCCACTCCACCGAGATTTCACTGTGGCTAGACCAAAGTCACCTATTTTTACCGTGAGGTCTTCATGAAGAAATATATCTGAGGTGCAGTAAGTAAAGGAAAAAAAAAAAAACAGATTGCATTTTCCTATTAGAGAAAGCATTTTGAAGATTTCAGGT	chr6	39627689	39627920		1
Inflammation_1	chr3	TXA0411525	Nras_1_2	ACCTCCTCACTCTTTCATATTCCC	GGCAAATACACAGAGGAACCCTT	164	51	ACCTCCTCACTCTTTCATATTCCCAGGATTCTTACCGAAAGCAAGTGGTGATTGATGGTGAGACCTGCCTGCTGGACATACTGGACACAGCTGGACAAGAGGAGTACAGTGCCATGAGAGACCAGTACATGAGGACAGGCGAAGGGTTCCTCTGTGTATTTGCC	chr3	103060175	103060338		7
Inflammation_1	Nras	TXA0411524	Nras_1_1	TAGGTAGGCGTATTCATCCTGGT	CTGTCCTCATGTACTGGTCTCTC	220	48	TAGGTAGGCGTATTCATCCTGGTTAATTACATTTCTCTGGTTTTAAATAAAGATTGAGCCTGTCCTTGTCCCCCCCACCACCACCTCCTCACTCTTTCATATTCCCAGGATTCTTACCGAAAGCAAGTGGTGATTGATGGTGAGACCTGCCTGCTGGACATACTGGACACAGCTGGACAAGAGGAGTACAGTGCCATGAGAGACCAGTACATGAGGACAG	chr3	103060093	103060312		6
Inflammation_1	chr7	TXA0411523	Hras_1_1	ATTTACCCATGACCACTGCCACA	CAGCCGCTGTAGAAGCTATGAC	181	55	ATTTACCCATGACCACTGCCACAGCCCACCTCTGGCAGGTAGGCAGAGCTCACCTCTATAGTGGGATCATACTCGTCCACAAAGTGGTTCTGGATCAGCTGGATGGTCAGGGCACTCTTTCCCACGCCTCCAGCGCCCACCACCACAAGCTTGTATTCTGTCATAGCTTCTACAGCGGCTG	chr7	141192777	141192957		7
Inflammation_1	Hras	TXA0411522	Hras_1_2	TAGTGGGATCATACTCGTCCACA	CTTGGGTCAGGCATCTATTAGCC	216	56	TAGTGGGATCATACTCGTCCACAAAGTGGTTCTGGATCAGCTGGATGGTCAGGGCACTCTTTCCCACGCCTCCAGCGCCCACCACCACAAGCTTGTATTCTGTCATAGCTTCTACAGCGGCTGCCAATCCAGGAGCTCCTGCCCCACCTGCCAATGAGAAGCACACTTAGCCAAGGCCCTTGCCACTTGAGACGGCTAATAGATGCCTGACCCAAG	chr7	141192835	141193050		8
Inflammation_1	chr6	TXA0411515	KRAS_t1_2	CTGCCGTCCTTTACAAGC	GTGTGAGACATGTTCTAATTTAGTTG	215	44	CTGCCGTCCTTTACAAGCGCACGCAGACTGTAGAGCAGCGTTACCTCTATCGTAGGGTCATACTCATCCACAAAGTGATTCTGAATTAGCTGTATCGTCAAGGCGCTCTTGCCTACGCCACCAGCTCCAACCACCACAAGTTTATACTCAGTCATTTTCAGCAGGCCTTACAATAAAAATAATAAAATACAACTAAATTAGAACATGTCTCACAC	chr6	145246651	145246865		3
Inflammation_1	KRAS	TXA0411514	KRAS_t1_3	TCGTAGGGTCATACTCATCCACA	TTACACACAAAGGTGAGTGTTAAAAT	216	37	TCGTAGGGTCATACTCATCCACAAAGTGATTCTGAATTAGCTGTATCGTCAAGGCGCTCTTGCCTACGCCACCAGCTCCAACCACCACAAGTTTATACTCAGTCATTTTCAGCAGGCCTTACAATAAAAATAATAAAATACAACTAAATTAGAACATGTCTCACACAAGATTATCAAAAACTTTATCAATATTTTAACACTCACCTTTGTGTGTAA	chr6	145246700	145246915		2
Inflammation_1	chr19	TXA0411505	Pten_3_1	AGCTCATTTTTGTTAATGGTGTT	TCTATCAGACTGCAACTGTTTTC	225	24	AGCTCATTTTTGTTAATGGTGTTTTTTTTGTTTGTTTTGTTTTAAGGTTTTTGGATTCAAAGCATAAAAACCATTACAAGATATACAATCTGTAAGTATGCTTTTTTTATTTGTCTCTGTTAAAATAACTAAATAAAAGTTATTTCTTTGTTGAAGataaaaatatatttagatatttttatatttGAGGAACTGGATTCCTGAAAACAGTTGCAGTCTGATAGA	chr19	32792503	32792727		5
Inflammation_1	chr19	TXA0411504	Pten_2_2	ttCTTACACTGGGATTATCTTTTTGC	CCGTCCCTTTCCAGCTTTACA	168	42	ttCTTACACTGGGATTATCTTTTTGCAACAGTTGCACAGTATCCTTTTGAAGACCATAACCCACCACAGCTAGAACTTATCAAACCCTTCTGTGAAGATCTTGACCAATGGCTAAGTGAAGATGACAATCATGTTGCAGCAATTCACTGTAAAGCTGGAAAGGGACGG	chr19	32799830	32799997	One primer sits in the repeat region	1
Inflammation_1	chr19	TXA0411503	Pten_1_2	TGCTAATATTGATACTCTTCCTTCCA	AGACAAGTCTATTGGTCTTTAGTTA	168	36	TGCTAATATTGATACTCTTCCTTCCAGTGTGAAAGGTAACTTTATGCCACATTTAAACTTTCTTGTAGATGTGCTGAGAGACATTATGACACCGCCAAATTTAACTGCAGAGGTATGTATAAACATAACCACAGCATACTGTATAACTAAAGACCAATAGACTTGTCT	chr19	32798003	32798170		5
Inflammation_1	chr19	TXA0411502	Pten_2_1	AATTTCCTGAAAGTTAGGCTTCT	GCAACATGATTGTCATCTTCACT	232	32	AATTTCCTGAAAGTTAGGCTTCTTTTAAGAACCAGTAAGTTTATATATAACATTTTGAAAGTTAACCTATGtttttaaataaaaaatttaaaattttCTTACACTGGGATTATCTTTTTGCAACAGTTGCACAGTATCCTTTTGAAGACCATAACCCACCACAGCTAGAACTTATCAAACCCTTCTGTGAAGATCTTGACCAATGGCTAAGTGAAGATGACAATCATGTTGC	chr19	32799735	32799966		2
Inflammation_1	Pten	TXA0411501	Pten_1_1	AAAGGTGGTATGATAGAAAGGGTG	TCACCAGGCAGTAAAAGACAAGT	216	36	aaaggtggtatgatagaaagggtggATAAATATTGCTAATATTGATACTCTTCCTTCCAGTGTGAAAGGTAACTTTATGCCACATTTAAACTTTCTTGTAGATGTGCTGAGAGACATTATGACACCGCCAAATTTAACTGCAGAGGTATGTATAAACATAACCACAGCATACTGTATAACTAAAGACCAATAGACTTGTCTTTTACTGCCTGGTGA	chr19	32797970	32798185	One primer sits in the repeat region	3
Inflammation_1	chr18	TXA0411472	APC_t15_1	ACTGTAAATGAAAGGTTCCTGAT	CAGATGTCAGCCTTATTCTCAGT	185	41	ACTGTAAATGAAAGGTTCCTGATTTACTAGTGAGGAATGTCAGAAGGGAGACCAAAAGAAAAAAGACTCTTAACTAAATGGCACATACTGTGTTTCAATCGTGACTAGGAATCAACCCTCAAAAGCGTTTTGAGTGCCTTATGGAACCTGTCTGCACACTGCACTGAGAATAAGGCTGACATCTG	chr18	34310585	34310769		7
Inflammation_1	APC	TXA0411453	APC_t15_2	ACTAGTGAGGAATGTCAGAAGGGA	GTATTTGTCTGGCTCCGGTAAGT	223	46	ACTAGTGAGGAATGTCAGAAGGGAGACCAAAAGAAAAAAGACTCTTAACTAAATGGCACATACTGTGTTTCAATCGTGACTAGGAATCAACCCTCAAAAGCGTTTTGAGTGCCTTATGGAACCTGTCTGCACACTGCACTGAGAATAAGGCTGACATCTGTGCTGTGGATGGAGCACTGGCATTTCTGGTTGGCACCCTCACTTACCGGAGCCAGACAAATAC	chr18	34310610	34310832		6
Inflammation_1	chr18	TXA0411452	APC_t15_3	AATCGTGACTAGGAATCAACCC	TATATACCTGTGGTCTTCGTTTG	234	46	AATCGTGACTAGGAATCAACCCTCAAAAGCGTTTTGAGTGCCTTATGGAACCTGTCTGCACACTGCACTGAGAATAAGGCTGACATCTGTGCTGTGGATGGAGCACTGGCATTTCTGGTTGGCACCCTCACTTACCGGAGCCAGACAAATACTTTAGCCATTATTGAAAGTGGAGGTGGGATATTACGGAATGTGTCCAGCTTGATAGCTACAAACGAAGACCACAGGTATATA	chr18	34310681	34310914		1
Inflammation_1	APC	TXA0411451	APC_t15_5	ACTTACCGGAGCCAGACAAATAC	AGGCCTCTTTGCTTAGAGCTTTC	220	32	ACTTACCGGAGCCAGACAAATACTTTAGCCATTATTGAAAGTGGAGGTGGGATATTACGGAATGTGTCCAGCTTGATAGCTACAAACGAAGACCACAGGTATATACCAAGTTCTATATTATTCTCTATTCTTTTATGTGAATTATTATAGTTTATTTCTTTAGAAAAACCTAATTCTAAATTGTTTTATATTATTATGAAAGCTCTAAGCAAAGAGGCCT	chr18	34310810	34311029		2
Inflammation_1	chr18	TXA0411450	APC_t14_1	TGCAACAGATTCTACTCTTACCTCT	TCAATGCTTTCACACTTCCAACT	189	34	TGCAACAGATTCTACTCTTACCTCTAGCATTAGAAACAAAAAGACAATTAGTCTTACTCATTTTACATGTAAATTGTTCTAAACTTGATTATTTCCAGGTTATTGCAAGTGTTTTGAGGAATTTGTCTTGGCGAGCAGATGTAAATAGCAAAAAGACGTTGAGAGAAGTTGGAAGTGTGAAAGCATTGA	chr18	34306165	34306353		5
Inflammation_1	chr18	TXA0411449	APC_t14_3	AGTGTTTTGAGGAATTTGTCTTGGC	TAAAGAGTCAGAGGCTAGTGGGT	164	40	AGTGTTTTGAGGAATTTGTCTTGGCGAGCAGATGTAAATAGCAAAAAGACGTTGAGAGAAGTTGGAAGTGTGAAAGCATTGATGGAATGTGCTTTGGAAGTTAAAAAGGTAATGTTAAAATGTTGGGTGCTGGAATAGgagacccactagcctctgactcttta	chr18	34306272	34306435	One primer sits in the repeat region	1
Inflammation_1	APC	TXA0411448	APC_t14_2	CCTCTAGCATTAGAAACAAAAAGACA	ctcCTATTCCAGCACCCAACATT	228	35	CCTCTAGCATTAGAAACAAAAAGACAATTAGTCTTACTCATTTTACATGTAAATTGTTCTAAACTTGATTATTTCCAGGTTATTGCAAGTGTTTTGAGGAATTTGTCTTGGCGAGCAGATGTAAATAGCAAAAAGACGTTGAGAGAAGTTGGAAGTGTGAAAGCATTGATGGAATGTGCTTTGGAAGTTAAAAAGGTAATGTTAAAATGTTGGGTGCTGGAATAGgag	chr18	34306185	34306412	One primer sits in the repeat region	7
Inflammation_1	APC	TXA0411446	APC_t13_1	AAATACGGCCATTTCAGGCAGAT	AGCCATACTTTAACACAAGCCACTA	222	39	AAATACGGCCATTTCAGGCAGATTCCTTGATGACTCTACTCCGCTTCTACTGTTACAGGCTACGCTGTGTTCTATGAAAGGCTGCATGAGAGCACTTGTGGCCCAGTTAAAATCTGAGAGTGAAGACTTACAGCAGGTACTACTTAGAATTTTAGCAAGTTAATGTACTAATTTATATTAAGCTTTGGTTTAGTATTTAGTGGCTTGTGTTAAAGTATGGCT	chr18	34305508	34305729		2
Inflammation_1	chr18	TXA0411445	APC_t12_3	CTGCAGGCCATTGCAGAG	ACTGAGCTACTTTAAGAAGTAAACCT	175	42	CTGCAGGCCATTGCAGAGTTATTGCAGGTGGACTGTGAGATGTATGGGCTTACTAATGACCACTACAGTGTTACTTTAAGACGGTATGCTGGAATGGCTTTGACAAACTTGACCTTTGGAGATGTTGCCAACAAGGTATGTCTTTTATAAGGTTTACTTCTTAAAGTAGCTCAGT	chr18	34304588	34304762		4
Inflammation_1	chr18	TXA0411444	APC_t12_1	ACCATGTATTCTCAGTCTTAGCG	TAGTAAGCCCATACATCTCACAG	173	39	ACCATGTATTCTCAGTCTTAGCGTTCTTTCCCCTCTGGTTTTAAATTACCAAATTATACCAGTGTATTTGATTCTAGATTATTCTATGTTTCCTTTTGCCCTTGTTAAATTAGGGGGACTGCAGGCCATTGCAGAGTTATTGCAGGTGGACTGTGAGATGTATGGGCTTACTA	chr18	34304470	34304642		8
Inflammation_1	chr18	TXA0411442	APC_t9_6	CCACAACATCATTCACTCACAG	AAAAAGAATCTCTAACCGAAAGC	216	45	CCACAACATCATTCACTCACAGCCTGATGACAAGAGAGGCAGGCGTGAAATCCGAGTCCTTCATCTTTTGGAACAGATACGAGCTTACTGTGAAACCTGTTGGGAGTGGCAGGAAGCCCACGAACAAGGCATGGACCAGGACAAAAACCCAAGTATGTTCTTTATAGTGTGCATCTCAATGCATGTTTCAAAAGCTTTCGGTTAGAGATTCTTTTT	chr18	34298650	34298865		8
Inflammation_1	APC	TXA0411438	APC_t12_4	ATTGCAGAGTTATTGCAGGTGGA	CTGTGGGAGACGCCAAAAAACTA	217	38	ATTGCAGAGTTATTGCAGGTGGACTGTGAGATGTATGGGCTTACTAATGACCACTACAGTGTTACTTTAAGACGGTATGCTGGAATGGCTTTGACAAACTTGACCTTTGGAGATGTTGCCAACAAGGTATGTCTTTTATAAGGTTTACTTCTTAAAGTAGCTCAGTTAGAACTAAAGAAAGAATTACTTATAACTAGTTTTTTGGCGTCTCCCACAG	chr18	34304597	34304813		1
Inflammation_1	APC	TXA0411437	APC_t12_2	TCTCAGTCTTAGCGTTCTTTCCC	GTTTGTCAAAGCCATTCCAGCAT	217	40	TCTCAGTCTTAGCGTTCTTTCCCCTCTGGTTTTAAATTACCAAATTATACCAGTGTATTTGATTCTAGATTATTCTATGTTTCCTTTTGCCCTTGTTAAATTAGGGGGACTGCAGGCCATTGCAGAGTTATTGCAGGTGGACTGTGAGATGTATGGGCTTACTAATGACCACTACAGTGTTACTTTAAGACGGTATGCTGGAATGGCTTTGACAAAC	chr18	34304479	34304695		6
Inflammation_1	chr18	TXA0411436	APC_t10_3	CTGTCCTGCTGTGTGTGTTCTAA	TCACATTAGTTCAACTTCTCTGTCT	180	36	CTGTCCTGCTGTGTGTGTTCTAATGAAGCTTTCATTTGATGAAGAGCATAGGCATGCAATGAATGAACTTGGTAAGATAAAAGCTTTCCTAACGCCACAAATACATGCTGCTGAGTGTTTAAAACACAAAAGAAATTGATTATTACTACAAGTTTAGACAGAGAAGTTGAACTAATGTGA	chr18	34299991	34300170		3
Inflammation_1	chr18	TXA0411435	APC_t10_2	TCTGCTTATTTAAAAATGTAACGACA	CATTCATTGCATGCCTATGCTC	166	36	TCTGCTTATTTAAAAATGTAACGACATCTTTTTTAAGATAACAAAGCATTATGACTCAGGTAACTTTATTTTTCAGTGCCAGCTCCTGTTGAGCATCAGATCTGTCCTGCTGTGTGTGTTCTAATGAAGCTTTCATTTGATGAAGAGCATAGGCATGCAATGAATG	chr18	34299890	34300055		2
Inflammation_1	APC	TXA0411434	APC_t10_1	CCTTCTATACATGAGGGATGTGTC	GCATGTATTTGTGGCGTTAGGAA	240	37	CCTTCTATACATGAGGGATGTGTCAATAACGTCTGCTTATTTAAAAATGTAACGACATCTTTTTTAAGATAACAAAGCATTATGACTCAGGTAACTTTATTTTTCAGTGCCAGCTCCTGTTGAGCATCAGATCTGTCCTGCTGTGTGTGTTCTAATGAAGCTTTCATTTGATGAAGAGCATAGGCATGCAATGAATGAACTTGGTAAGATAAAAGCTTTCCTAACGCCACAAATACATGC	chr18	34299859	34300098		5
Inflammation_1	chr18	TXA0411428	APC_t7_1	TTGATTCATCGAGAGTTTTGAAGC	GTGTTGCTTTCTGCCACTCC	176	47	TTGATTCATCGAGAGTTTTGAAGCAAAAAATAAGCAGTGAGCTCTAAAAGCATGCTGTTTCTGTATGTAATGATACTAACTCCATGTTAACAGAGGTCATCTCAGAGCAGGCATGATGCTGCCTCCCATGAAGCTGGCCGGCAGCACGAAGGCCACGGAGTGGCAGAAAGCAACAC	chr18	34289745	34289920		1
Inflammation_1	chr18	TXA0411427	APC_t7_3	ATGATGCTGCCTCCCATGAAG	ATCGAGAGTGCTTTGATACTGAA	172	50	ATGATGCTGCCTCCCATGAAGCTGGCCGGCAGCACGAAGGCCACGGAGTGGCAGAAAGCAACACCGCAGCCTCCAGTAGTGGTCAGGTATGAATATTTTCAAACTGACAAGTCCTGTCTGTTTCCTTAGAATGTGTGCCTCTAGAGACATTCAGTATCAAAGCACTCTCGAT	chr18	34289857	34290028		8
Inflammation_1	APC	TXA0411426	APC_t8_1	TCTAAATTGGGAGCTTCAGAGTGG	GCAAAATACCCCTAGCACTAGCA	220	45	TCTAAATTGGGAGCTTCAGAGTGGCCTATATTTATAATCTAAATTGCACTGCCTATAATTTGCTTAACTTCTAGAGTCCAGCTACACGTGTGGATCACGAAACAGCCAGTGTTTTGAGTTCTAGCGGCACGCACTCTGCTCCTCGAAGGTTGACAAGTCATCTGGGGACAAAGGTAACAGCAGATTACAAACCCTCTTGCTAGTGCTAGGGGTATTTTGC	chr18	34295957	34296176		3
Inflammation_1	APC	TXA0411425	APC_t7_2	AGCAAAAAATAAGCAGTGAGCTCTAA	AGAGGCACACATTCTAAGGAAACA	233	47	AGCAAAAAATAAGCAGTGAGCTCTAAAAGCATGCTGTTTCTGTATGTAATGATACTAACTCCATGTTAACAGAGGTCATCTCAGAGCAGGCATGATGCTGCCTCCCATGAAGCTGGCCGGCAGCACGAAGGCCACGGAGTGGCAGAAAGCAACACCGCAGCCTCCAGTAGTGGTCAGGTATGAATATTTTCAAACTGACAAGTCCTGTCTGTTTCCTTAGAATGTGTGCCTCT	chr18	34289766	34289998		7
Inflammation_1	chr18	TXA0411424	APC_t6_2	TGCACACTACACATAAAAATCAAT	GATGCCCCATTGACTACACA	220	47	TGCACACTACACATAAAAATCAATGAATATCTGACTTGTTCTCGTCTTCTATTTCAGCGAAGAATAGCCAGGATCCAGCAAATAGAAAAGGACATACTGCGCGTGCGCCAGCTTTTACAGTCCCAGGCGGCGGAAGCGGAGGTTAGTAAAGCCCCCTTCTGGTACAAGTCATGTAAGGAGCTCTCCCAGAAAAGAAGATGTGTGTAGTCAATGGGGCATC	chr18	34279212	34279431		2
Inflammation_1	chr18	TXA0411423	APC_t5_2	AGCATGGTGACTTTCATAGTTGT	GCCAAGCTGCTCCTCCATT	190	42	AGCATGGTGACTTTCATAGTTGTTTACTCAATTTCTTAACTGATACTTATGTGCTTTTTGGCTTTACTAGTAAACTGAGAAATTAATGTGCTGTTTGTGGTCTTAGTTTTCCTTACAGACAGACATGACAAGACGGCAGCTGGAGTATGAAGCAAGGCAGATCAGGGCTGCAATGGAGGAGCAGCTTGGC	chr18	34276458	34276647		7
Inflammation_1	chr18	TXA0411422	APC_t5_4	TTACAGACAGACATGACAAGACG	CACACAGGCAATGGAGTAACAGA	169	54	TTACAGACAGACATGACAAGACGGCAGCTGGAGTATGAAGCAAGGCAGATCAGGGCTGCAATGGAGGAGCAGCTTGGCACCTGCCAGGACATGGAGAAGCGTGCACAGGTGATTCTCCCACTGCACACTACAGCTCTGCTGATGGTTCTGTTACTCCATTGCCTGTGTG	chr18	34276570	34276738		8
Inflammation_1	APC	TXA0411421	APC_t6_1	ATACACCCATGTCAAGACACTCC	CCTTACATGACTTGTACCAGAAGGG	221	46	ATACACCCATGTCAAGACACTCCAGGGGTACCACATATTAATATGCACACTACACATAAAAATCAATGAATATCTGACTTGTTCTCGTCTTCTATTTCAGCGAAGAATAGCCAGGATCCAGCAAATAGAAAAGGACATACTGCGCGTGCGCCAGCTTTTACAGTCCCAGGCGGCGGAAGCGGAGGTTAGTAAAGCCCCCTTCTGGTACAAGTCATGTAAGG	chr18	34279169	34279389		1
Inflammation_1	APC	TXA0411420	APC_t5_3	TGTGCTGTTTGTGGTCTTAGTTTTC	GGTAACCGCTGCATCACTAACTA	231	54	TGTGCTGTTTGTGGTCTTAGTTTTCCTTACAGACAGACATGACAAGACGGCAGCTGGAGTATGAAGCAAGGCAGATCAGGGCTGCAATGGAGGAGCAGCTTGGCACCTGCCAGGACATGGAGAAGCGTGCACAGGTGATTCTCCCACTGCACACTACAGCTCTGCTGATGGTTCTGTTACTCCATTGCCTGTGTGGCGGGCGGGGCTGTAGTTAGTGATGCAGCGGTTACC	chr18	34276544	34276774		3
Inflammation_1	APC	TXA0411419	APC_t5_1	GGTTTCTCAAGCATGGTGACTTT	GAATCACCTGTGCACGCTTCTC	236	44	GGTTTCTCAAGCATGGTGACTTTCATAGTTGTTTACTCAATTTCTTAACTGATACTTATGTGCTTTTTGGCTTTACTAGTAAACTGAGAAATTAATGTGCTGTTTGTGGTCTTAGTTTTCCTTACAGACAGACATGACAAGACGGCAGCTGGAGTATGAAGCAAGGCAGATCAGGGCTGCAATGGAGGAGCAGCTTGGCACCTGCCAGGACATGGAGAAGCGTGCACAGGTGATTC	chr18	34276449	34276684		5
Inflammation_1	TRP53	TXA0167204	TRP53_t11_1	TGATCAAGGAGGAAAGCCCAAAC	GTGTCTCAGCCCTGAAGTCATAA	225	52	TGATCAAGGAGGAAAGCCCAAACTGCTAGCTCCCATCACTTCATCCCTCCCCTTTTCTGTCTTCCTATAGCTACCTGAAGACCAAGAAGGGCCAGTCTACTTCCCGCCATAAAAAAACAATGGTCAAGAAAGTGGGGCCTGACTCAGACTGACTGCCTCTGCATCCCGTCCCCATCACCAGCCTCCCCCTCTCCTTGCTGTCTTATGACTTCAGGGCTGAGACAC	chr11	69591280	69591504		1
Inflammation_1	TRP53	TXA0167203	TRP53_t3_4	TGAAGCCCTCCGAGTGTCAG	GGCATTGAAAGGTCACACGAAAG	239	59	TGAAGCCCTCCGAGTGTCAGGAGCTCCTGCAGCACAGGACCCTGTCACCGAGACCCCTGGGCCAGTGGCCCCTGCCCCAGCCACTCCATGGCCCCTGTCATCTTTTGTCCCTTCTCAAAAAACTTACCAGGGCAACTATGGCTTCCACCTGGGCTTCCTGCAGTCTGGGACAGCCAAGTCTGTTATGTGCACGGTGAGTGGGCCCCGGGGAGTTGTCTTTCGTGTGACCTTTCAATGCC	chr11	69587440	69587678		8
Inflammation_1	TRP53	TXA0167202	TRP53_t3_2	TGAGAACACAGTCCTGAGGGT	TGAGAAGGGACAAAAGATGACAG	227	58	TGAGAACACAGTCCTGAGGGTTCTTCTTTGTCCCATCCACAGCCATCACCTCACTGCATGGACGATCTGTTGCTGCCCCAGGATGTTGAGGAGTTTTTTGAAGGCCCAAGTGAAGCCCTCCGAGTGTCAGGAGCTCCTGCAGCACAGGACCCTGTCACCGAGACCCCTGGGCCAGTGGCCCCTGCCCCAGCCACTCCATGGCCCCTGTCATCTTTTGTCCCTTCTCA	chr11	69587330	69587556		4
Inflammation_1	TRP53	TXA0167200	TRP53_t9_1	GTGAAAGTGGTTGTGTGACCTTG	CTTTCACTACAAAGGCTGAGCTG	240	56	GTGAAAGTGGTTGTGTGACCTTGTCCAGTGCTTCCATCTCACTTCATCTCTGCTGCAGATCCGCGGGCGTAAACGCTTCGAGATGTTCCGGGAGCTGAATGAGGCCTTAGAGTTAAAGGATGCCCATGCTACAGAGGAGTCTGGAGACAGCAGGGCTCACTCCAGGTAAGTGGCCTGGGGCAGCGCCTGCCTGTGGTGCTCTACCCAGACCTCCCTCCAGCTCAGCCTTTGTAGTGAAAG	chr11	69590598	69590837		4
Inflammation_1	TRP53	TXA0167197	TRP53_t7_1	CTTTCTTACTGCCTTGTGCTGGT	GACTTTGGGGTGAAGCTCAACA	235	56	CTTTCTTACTGCCTTGTGCTGGTCCTTTTCTTGTCCCGGATAGTGGGAACCTTCTGGGACGGGACAGCTTTGAGGTTCGTGTTTGTGCCTGCCCTGGGAGAGACCGCCGTACAGAAGAAGAAAATTTCCGCAAAAAGGAAGTCCTTTGCCCTGAACTGCCCCCAGGGAGCGCAAAGAGAGGTACGCAGGCGGGACCAAGGAGGCGGAGGAGCCTGTTGAGCTTCACCCCAAAGTC	chr11	69589530	69589764		1
Inflammation_1	TRP53	TXA0167196	TRP53_t5_1	CTGCTCCGATGGTGATGGTAAG	agacgcacaaACCAAAACAAAAT	238	54	CTGCTCCGATGGTGATGGTAAGCCCTCAACACCGCCTGTGGGGTTAGGACTGGCAGCCTCCCATCTCCCGGCTTCTGACTTATTCTTGCTCTTAGGCCTGGCTCCTCCCCAGCATCTTATCCGGGTGGAAGGAAATTTGTATCCCGAGTATCTGGAAGACAGGCAGACTTTTCGCCACAGCGTGGTGGTACCTTATGAGCCACCCGAGGTCTGTAATTTTGTTTTGGTttgtgcgtct	chr11	69588531	69588768	One primer sits in the repeat region	3
Inflammation_1	TRP53	TXA0167195	TRP53_t6_1	GTCACCTGTAGTGAGGTAGGGA	CGTGGAACAGAAACAGGCAGAA	233	55	GTCACCTGTAGTGAGGTAGGGAGCGACTTCACCTGGATCCTGTGTCTTCCCCCAGGCCGGCTCTGAGTATACCACCATCCACTACAAGTACATGTGTAATAGCTCCTGCATGGGGGGCATGAACCGCCGACCTATCCTTACCATCATCACACTGGAAGACTCCAGGTAGGAAGGCGCGTGGTAGGTTAGGTTAGCCTGTTTCTTCCCCAGCTTCTGCCTGTTTCTGTTCCACG	chr11	69589086	69589318		7
Inflammation_1	TRP53	TXA0167194	TRP53_t2_2	caaaaaaTGGAAGGAAATCAGGAACT	AGCAACAGATCGTCCATGCAG	196	49	caaaaaaTGGAAGGAAATCAGGAACTAACTCTCTGCTCTTGTTTTCCAGACTTCCTCCAGAAGATATCCTGGTAAGGCCCAGAGCAGAAAGGGACTTGGGCTTTGGTGTTGGGCTGGTAGGCTGAGAACACAGTCCTGAGGGTTCTTCTTTGTCCCATCCACAGCCATCACCTCACTGCATGGACGATCTGTTGCT	chr11	69587208	69587403	One primer sits in the repeat region	1
Inflammation_1	TRP53	TXA0167193	TRP53_t10_1	TCCAGTGTGTTCTGTGAATATCCC	CCCCACTTTCTTGACCATTGTTT	226	47	TCCAGTGTGTTCTGTGAATATCCCTACCCATAGTAGAAGCCATCTTAAATTCCTTTTTTTCAGCCTCCAGCCTAGAGCCTTCCAAGCCTTGATCAAGGAGGAAAGCCCAAACTGCTAGCTCCCATCACTTCATCCCTCCCCTTTTCTGTCTTCCTATAGCTACCTGAAGACCAAGAAGGGCCAGTCTACTTCCCGCCATAAAAAAACAATGGTCAAGAAAGTGGGG	chr11	69591191	69591416		8
Inflammation_1	TRP53	TXA0167192	TRP53_t1_1	CTACTGGATGTCCCACCTTCTTT	TCTTAAGGGCCCCAAAAAGATCC	237	43	ctactggatgtcccaccttctttttattctaccctttcctataagccataggggtttgtttgtttgtatgttttttaattgacaagttatgcatccatacagtacacaatctcttctctctacaGATGACTGCCATGGAGGAGTCACAGTCGGATATCAGCCTCGAGCTCCCTCTGAGCCAGGAGACATTTTCAGGCTTATGGAAACTGTGAGTGGATCTTTTTGGGGCCCTTAAGA	chr11	69586766	69587002	One primer sits in the repeat region	5
Inflammation_1	KRAS	TXA0167191	KRAS_t2_2	CACATGCCAACTTTCTTATTCAACT	ATCCAGACTGTGTTTCTCCCTTC	240	41	CACATGCCAACTTTCTTATTCAACTTAAACCCACCTATAATGGTGAATATCTTCAAATGATTTAGTATTATTTATGGCAAATACACAAAGAAAGCCCTCCCCAGTTCTCATGTACTGGTCCCTCATTGCACTGTACTCCTCTTGACCTGCTGTGTCGAGAATATCCAAGAGACAGGTTTCTCCATCAATTACTACTTGTTTCCTGTAGGAGTCCTGAGAAGGGAGAAACACAGTCTGGAT	chr6	145234214	145234453		7
Inflammation_1	KRAS	TXA0167190	KRAS_t4_1	CTGACAGTTTGCACGAACAGAAG	TGCCTTCTATACATTAGTCCGAGA	233	33	CTGACAGTTTGCACGAACAGAAGAAAAAAAAAGATTAGGTAATGCTAAAACAAATGCTAATAATTTAGTGTAATGTACAAAAATCACACTTTTACTTAAGTGTGCCTTAAGAAAGAGTACAAAGTATTCACATAACTGTACACCTTGTCCTTGACTTCTTCTTCTTCTTCTTCCCATCTTTGCTCATCTTTTCTTTATGTTTTCGAATTTCTCGGACTAATGTATAGAAGGCA	chr6	145220481	145220713		2
Inflammation_1	KRAS	TXA0167189	KRAS_t3_2	ATCTGGAGCACCAAGCAGAG	GCTTCTGCTTCACTTTGTTTCTTC	240	46	ATCTGGAGCACCAAGCAGAGCACAGACTCACGTCTGTCCAGTTGTACTCACCTGTCTTGTCTTTGCTGAGGTCTCAATGAACGGAATCCCGTAACTCCTTGCTAACTCCTGAGCCTGTTTCGTGTCTACTGTTCTAGAAGGCAAATCACACTTATTCCCTACCAGGACCATAGGCACATCTTCAGAGTCCTTTACTCTTTTAATTTGTTCTCTGGGGAAGAAACAAAGTGAAGCAGAAGC	chr6	145232044	145232283		2
Inflammation_1	KRAS	TXA0167187	KRAS_t4_3	TCACATAACTGTACACCTTGTCCT	GGGTACTCAAGCGTCCATTAACA	217	37	TCACATAACTGTACACCTTGTCCTTGACTTCTTCTTCTTCTTCTTCCCATCTTTGCTCATCTTTTCTTTATGTTTTCGAATTTCTCGGACTAATGTATAGAAGGCATCGTCAACACCCTGAAATATAAAAAAAAAGTATATATAAGACATGTTAATATGCGATGGCTTGCCATGCTCAGATGACAGACTTTCACTGTTAATGGACGCTTGAGTACCC	chr6	145220608	145220824		3
Inflammation_2	chr4	TXA0447326	ZC3H12A_t5_9	ATAGCTGTGATAACCTGCATAGG	CTTGCACACACCCAGGA	162	60	ATAGCTGTGATAACCTGCATAGGGGCCCCGAGTGGGGCCCGACTCCCCAGGGCTGCCTCCTCGCACGCCCCATAATTCTGACATCTGGCTCTCCAGGGAACCAATGCCTGAATCAAGGCACTCCTGGGAGGTGTATGGGAGTGAGTCCTGGGTGTGTGCAAG	chr4	125119657	125119818		3
Inflammation_2	ZC3H12A	TXA0447319	ZC3H12A_t5_8	CATAGTCGGTGGGGACACTGAAG	CAGGACTCACTCCCATACACCT	235	59	CATAGTCGGTGGGGACACTGAAGTGGCCAGCACCCATGGCTGGTCTAAAAGGAGAAAAGGAAGGTGCTGCTGGGACCTTGGATCCATAGCTGTGATAACCTGCATAGGGGCCCCGAGTGGGGCCCGACTCCCCAGGGCTGCCTCCTCGCACGCCCCATAATTCTGACATCTGGCTCTCCAGGGAACCAATGCCTGAATCAAGGCACTCCTGGGAGGTGTATGGGAGTGAGTCCTG	chr4	125119572	125119806		8
Inflammation_2	chr4	TXA0447333	ZC3H12A_t5_7	CTCTGGATGGGTAGGTGGGT	TTATGGGGCGTGCGAGGA	190	62	CTCTGGATGGGTAGGTGGGTGGCGGGGGCACATAGTCGGTGGGGACACTGAAGTGGCCAGCACCCATGGCTGGTCTAAAAGGAGAAAAGGAAGGTGCTGCTGGGACCTTGGATCCATAGCTGTGATAACCTGCATAGGGGCCCCGAGTGGGGCCCGACTCCCCAGGGCTGCCTCCTCGCACGCCCCATAA	chr4	125119542	125119731		7
Inflammation_2	chr4	TXA0447318	ZC3H12A_t5_6	TGAAGGACAGGAGTGGGT	CAGCCCTGGGGAGTCG	219	61	TGAAGGACAGGAGTGGGTGGGGGTAATGGGTACGGCTCAGACCAGTACTCTCTGGATGGGTAGGTGGGTGGCGGGGGCACATAGTCGGTGGGGACACTGAAGTGGCCAGCACCCATGGCTGGTCTAAAAGGAGAAAAGGAAGGTGCTGCTGGGACCTTGGATCCATAGCTGTGATAACCTGCATAGGGGCCCCGAGTGGGGCCCGACTCCCCAGGGCTG	chr4	125119493	125119711		2
Inflammation_2	chr4	TXA0447327	ZC3H12A_t5_5	TTTCTTTGGCCAGGTCACCCA	GCAGCACCTTCCTTTTCTCCTTT	220	64	TTTCTTTGGCCAGGTCACCCACCCTGCCCCAGGGGCCCCCACCAGCCCCGGGGCTGGGTCTCTGGGGCTCCTGAAGGACAGGAGTGGGTGGGGGTAATGGGTACGGCTCAGACCAGTACTCTCTGGATGGGTAGGTGGGTGGCGGGGGCACATAGTCGGTGGGGACACTGAAGTGGCCAGCACCCATGGCTGGTCTAAAAGGAGAAAAGGAAGGTGCTGC	chr4	125119422	125119641		6
Inflammation_2	ZC3H12A	TXA0447323	ZC3H12A_t5_4	GCGTCTCATTACAGCTTCTACCA	TTCAGTGTCCCCACCGACTAT	240	63	GCGTCTCATTACAGCTTCTACCAGGTGTGGGGGGAAGACACCACACAGCTTGGTATATACACCAGCCCTTTCTTTGGCCAGGTCACCCACCCTGCCCCAGGGGCCCCCACCAGCCCCGGGGCTGGGTCTCTGGGGCTCCTGAAGGACAGGAGTGGGTGGGGGTAATGGGTACGGCTCAGACCAGTACTCTCTGGATGGGTAGGTGGGTGGCGGGGGCACATAGTCGGTGGGGACACTGAA	chr4	125119354	125119593		1
Inflammation_2	chr4	TXA0447330	ZC3H12A_t5_3	CTGTGGGAAGCGTCTCATTACAG	GTCTGAGCCGTACCCATTACC	190	63	CTGTGGGAAGCGTCTCATTACAGCTTCTACCAGGTGTGGGGGGAAGACACCACACAGCTTGGTATATACACCAGCCCTTTCTTTGGCCAGGTCACCCACCCTGCCCCAGGGGCCCCCACCAGCCCCGGGGCTGGGTCTCTGGGGCTCCTGAAGGACAGGAGTGGGTGGGGGTAATGGGTACGGCTCAGAC	chr4	125119345	125119534		5
Inflammation_2	ZC3H12A	TXA0447320	ZC3H12A_t5_2	CTGGGGACCGCTATCTGTGA	GTGGGTGACCTGGCCAAAG	216	58	CTGGGGACCGCTATCTGTGATGCCCGACAGCCCCTTGCGCCACCTTCTGGCTTACTCACTGAGGTGCTGGGACTTGTAAGACAGGATCTCTGCGGCCAGCTGCTGCGGATCCAGCAGCTGTGGGAAGCGTCTCATTACAGCTTCTACCAGGTGTGGGGGGAAGACACCACACAGCTTGGTATATACACCAGCCCTTTCTTTGGCCAGGTCACCCAC	chr4	125119228	125119443		8
Inflammation_2	chr4	TXA0447329	ZC3H12A_t5_15	CCTCTGGCTACTTTTGTCCTTGA	CTGAATCCCAAGTCTGTGCCTC	212	57	CCTCTGGCTACTTTTGTCCTTGACTGGAGTCCTGGGAGGTGAGAGGAGAGCGTTGGCACGGAGCTCATCGGCCACAGAGCGCTGGGGACGGCTTGGCCGCTCAGGGTGGAAAAATCGGCACTTGATTCCATACGTACATTTCTTCCCTGCAAGAACAGAGAGGGTGTCTAAATGGGGTCAGAGCGAGGACGAGGCACAGACTTGGGATTCAG	chr4	125119999	125120210		8
Inflammation_2	ZC3H12A	TXA0447324	ZC3H12A_t5_14	TTCAGCCTCTAGGGACACAG	CTCTGACCCCATTTAGACACCCT	228	57	TTCAGCCTCTAGGGACACAGAGCTGGACTGAGAGGCAGGGGAAGGCCTCTGGCTACTTTTGTCCTTGACTGGAGTCCTGGGAGGTGAGAGGAGAGCGTTGGCACGGAGCTCATCGGCCACAGAGCGCTGGGGACGGCTTGGCCGCTCAGGGTGGAAAAATCGGCACTTGATTCCATACGTACATTTCTTCCCTGCAAGAACAGAGAGGGTGTCTAAATGGGGTCAGAG	chr4	125119954	125120181		1
Inflammation_2	chr4	TXA0447332	ZC3H12A_t5_13	GTGAGCCTTCTCGGTGGG	GTGGCCGATGAGCTCCG	187	61	GTGAGCCTTCTCGGTGGGGACCCGGAGATGACCTGGCACCCAGCTTTTTCCCATCCAGGCTGCCTGGTTCAGCCTCTAGGGACACAGAGCTGGACTGAGAGGCAGGGGAAGGCCTCTGGCTACTTTTGTCCTTGACTGGAGTCCTGGGAGGTGAGAGGAGAGCGTTGGCACGGAGCTCATCGGCCAC	chr4	125119887	125120073		3
Inflammation_2	ZC3H12A	TXA0447321	ZC3H12A_t5_12	AAAGCTGCCCCCACTAACAG	CCAACGCTCTCCTCTCACCT	221	62	AAAGCTGCCCCCACTAACAGGGAGGCTCCTGCCAGCTGGAGCACAGGTCTGCGGTGAGCCTTCTCGGTGGGGACCCGGAGATGACCTGGCACCCAGCTTTTTCCCATCCAGGCTGCCTGGTTCAGCCTCTAGGGACACAGAGCTGGACTGAGAGGCAGGGGAAGGCCTCTGGCTACTTTTGTCCTTGACTGGAGTCCTGGGAGGTGAGAGGAGAGCGTTGG	chr4	125119834	125120054		5
Inflammation_2	chr4	TXA0447331	ZC3H12A_t5_11	ACTCCTGGGAGGTGTATGGG	CCCCTGCCTCTCAGTCCA	219	63	ACTCCTGGGAGGTGTATGGGAGTGAGTCCTGGGTGTGTGCAAGCCACTCTGTGGGCCCAAAGCTGCCCCCACTAACAGGGAGGCTCCTGCCAGCTGGAGCACAGGTCTGCGGTGAGCCTTCTCGGTGGGGACCCGGAGATGACCTGGCACCCAGCTTTTTCCCATCCAGGCTGCCTGGTTCAGCCTCTAGGGACACAGAGCTGGACTGAGAGGCAGGGG	chr4	125119776	125119994		4
Inflammation_2	ZC3H12A	TXA0447322	ZC3H12A_t5_10	CCCATAATTCTGACATCTGGCTCT	CTGGATGGGAAAAAGCTGGGT	220	60	CCCATAATTCTGACATCTGGCTCTCCAGGGAACCAATGCCTGAATCAAGGCACTCCTGGGAGGTGTATGGGAGTGAGTCCTGGGTGTGTGCAAGCCACTCTGTGGGCCCAAAGCTGCCCCCACTAACAGGGAGGCTCCTGCCAGCTGGAGCACAGGTCTGCGGTGAGCCTTCTCGGTGGGGACCCGGAGATGACCTGGCACCCAGCTTTTTCCCATCCAG	chr4	125119725	125119944		6
Inflammation_2	chr4	TXA0447328	ZC3H12A_t5_1	TGTCCTTCTGTCCAGCTTCCA	TACCAAGCTGTGTGGTGTCTTC	220	60	TGTCCTTCTGTCCAGCTTCCAGGGTAGGCCAGGCAGGGGCTGGGGACCGCTATCTGTGATGCCCGACAGCCCCTTGCGCCACCTTCTGGCTTACTCACTGAGGTGCTGGGACTTGTAAGACAGGATCTCTGCGGCCAGCTGCTGCGGATCCAGCAGCTGTGGGAAGCGTCTCATTACAGCTTCTACCAGGTGTGGGGGGAAGACACCACACAGCTTGGTA	chr4	125119189	125119408		4
Inflammation_2	chr4	TXA0447334	ZC3H12A_t4_2	GCAAGAGGAAAGGTAGGGTAAGT	TCCTGAGCGTTCTGCTTCAC	189	54	GCAAGAGGAAAGGTAGGGTAAGTAAGACTATTGAGGACAGAGCTGGGTCTCACCATAGGGGCATGGCTGCTTCCTGTGCTCAGAAGGCAGTGGTTTCTTACGAAGGAAGTTGTCCAGGCTAGGCCCATGCCGTCCTAAAGGGTCGTCAGGGGGCATGAACCTGTGGTAGGTGAAGCAGAACGCTCAGGA	chr4	125120273	125120461		7
Inflammation_2	ZC3H12A	TXA0447325	ZC3H12A_t4_1	CTAAGTGGGATGGGACAGGCAA	TTGGTTCCTCTTCACGACTTCTG	232	53	CTAAGTGGGATGGGACAGGCAAGAGGAAAGGTAGGGTAAGTAAGACTATTGAGGACAGAGCTGGGTCTCACCATAGGGGCATGGCTGCTTCCTGTGCTCAGAAGGCAGTGGTTTCTTACGAAGGAAGTTGTCCAGGCTAGGCCCATGCCGTCCTAAAGGGTCGTCAGGGGGCATGAACCTGTGGTAGGTGAAGCAGAACGCTCAGGAAACAGAAGTCGTGAAGAGGAACCAA	chr4	125120255	125120486		6
Inflammation_2	ZC3H12A	TXA0447335	ZC3H12A_t3_4	GTCTCGGTACGTGTCATTGGAG	CTGTGGGTCCATCTTAGGGTCT	221	57	GTCTCGGTACGTGTCATTGGAGACCACCACTCCGTCGGATTCGAAGGCCAGCTTCACAATGAAGCGGTCATCATAGCACACCACGCGCTTGCCGCCGACCCGCCTGGATGGCGTGAACACCAAGATCTTCTTTTTCTCTAGTTCCCGAAGGATGTGCTGGTCTGGGGGATGAGCAGAGCTGCAGGTCAGGGCCCATTGGAGACCCTAAGATGGACCCACAG	chr4	125120946	125121166		1
Inflammation_2	chr4	TXA0447339	ZC3H12A_t3_3	CCTCTCGCCTTGGAGGTCT	ACCTGCAGCTCTGCTCATC	201	58	CCTCTCGCCTTGGAGGTCTCGGTACGTGTCATTGGAGACCACCACTCCGTCGGATTCGAAGGCCAGCTTCACAATGAAGCGGTCATCATAGCACACCACGCGCTTGCCGCCGACCCGCCTGGATGGCGTGAACACCAAGATCTTCTTTTTCTCTAGTTCCCGAAGGATGTGCTGGTCTGGGGGATGAGCAGAGCTGCAGGT	chr4	125120931	125121131		3
Inflammation_2	chr4	TXA0447338	ZC3H12A_t3_2	AACTCATGTCACCCCGAAAG	GAATCCGACGGAGTGGTG	187	58	AACTCATGTCACCCCGAAAGCTGCAGCCCAGCCTGTGGGCCCAGCAGAGCCAGTCCCCAGCAGTAACGTACTTGTCATTGACGAAGGAGTACATGAGCAGCCGCTCCTCGATGAAGCGTTTCCACTCCTGCCTCTCGCCTTGGAGGTCTCGGTACGTGTCATTGGAGACCACCACTCCGTCGGATTC	chr4	125120801	125120987		2
Inflammation_2	ZC3H12A	TXA0447336	ZC3H12A_t3_1	CTAGCCTTCTCCCTGCAACTCAT	GCTATGATGACCGCTTCATTGTG	238	58	CTAGCCTTCTCCCTGCAACTCATGTCACCCCGAAAGCTGCAGCCCAGCCTGTGGGCCCAGCAGAGCCAGTCCCCAGCAGTAACGTACTTGTCATTGACGAAGGAGTACATGAGCAGCCGCTCCTCGATGAAGCGTTTCCACTCCTGCCTCTCGCCTTGGAGGTCTCGGTACGTGTCATTGGAGACCACCACTCCGTCGGATTCGAAGGCCAGCTTCACAATGAAGCGGTCATCATAGC	chr4	125120785	125121022		5
Inflammation_2	chr4	TXA0447340	ZC3H12A_t2_3	ATAGGCACATCTGGTCGAGG	ACTGACTACATACAGACTGGCTA	190	53	ATAGGCACATCTGGTCGAGGCTGTTCCTTCCTCCAAGATGGCACAAACACGGTAATATCTGTGTGGCCTCGCTCCAGAAACCAGTTCACAGCCAGCAGAATGCCCCGGCAAGAGAAGACTTCCTTGTTCCCATGGCTGGCAGAGGAGGGAAAGGTTAGCTCACAGAGTAGCCAGTCTGTATGTAGTCAGT	chr4	125122259	125122448		1
Inflammation_2	ZC3H12A	TXA0447337	ZC3H12A_t2_2	GGTCCCTAGTAGAGTGAGGCTAT	GGCTACTCTGTGAGCTAACCTTT	224	54	GGTCCCTAGTAGAGTGAGGCTATCCTACTTCCAGAGGGCATACATACCTGTGATAGGCACATCTGGTCGAGGCTGTTCCTTCCTCCAAGATGGCACAAACACGGTAATATCTGTGTGGCCTCGCTCCAGAAACCAGTTCACAGCCAGCAGAATGCCCCGGCAAGAGAAGACTTCCTTGTTCCCATGGCTGGCAGAGGAGGGAAAGGTTAGCTCACAGAGTAGCC	chr4	125122207	125122430		8
Inflammation_2	chr4	TXA0447341	ZC3H12A_t2_1	GTGCTGACCCTATTTAAGGACCC	GGCTGTGAACTGGTTTCTGGAG	184	53	GTGCTGACCCTATTTAAGGACCCTTTGGGGAAGCACCAGGGTCCCTAGTAGAGTGAGGCTATCCTACTTCCAGAGGGCATACATACCTGTGATAGGCACATCTGGTCGAGGCTGTTCCTTCCTCCAAGATGGCACAAACACGGTAATATCTGTGTGGCCTCGCTCCAGAAACCAGTTCACAGCC	chr4	125122168	125122351		4
Inflammation_2	chr4	TXA0447347	ZC3H12A_t1_7	TTCATCTGCAGCTCGGAAGTAG	CTTAACCCTGTGGTCTGGTCAAT	211	53	TTCATCTGCAGCTCGGAAGTAGGGGCCTCTTTAGCCACAGGATCCTGGTCTGGCTGAGGTCGACCCTGGCTGCTGTGTCTGTCCTCAAGACTCCACAGACTCATGGTGGGGTTGGATTCTTGGACAGGCTTCGTTCCACAAGGGTCACTCATATTTCACATTCTTGGAATGTGTCCATCACAGCTCCTATTGACCAGACCACAGGGTTAAG	chr4	125126897	125127107		3
Inflammation_2	ZC3H12A	TXA0447342	ZC3H12A_t1_6	CTGTGGATCTCAGAGGACGAGTA	TAGGAGCTGTGATGGACACATTC	237	53	CTGTGGATCTCAGAGGACGAGTACCCCAGTTTACGGAAAAAGTCCACCTTCATCTGCAGCTCGGAAGTAGGGGCCTCTTTAGCCACAGGATCCTGGTCTGGCTGAGGTCGACCCTGGCTGCTGTGTCTGTCCTCAAGACTCCACAGACTCATGGTGGGGTTGGATTCTTGGACAGGCTTCGTTCCACAAGGGTCACTCATATTTCACATTCTTGGAATGTGTCCATCACAGCTCCTA	chr4	125126849	125127085		5
Inflammation_2	chr4	TXA0447346	ZC3H12A_t1_5	CTGAGCCATGCTTCACCAATTC	TCGACCTCAGCCAGACCAG	182	55	CTGAGCCATGCTTCACCAATTCCCCTAGCACCGTGTTGGTGTCTGCTTGGACTCCCAGCTTCTGCAGGACACTGTGGATCTCAGAGGACGAGTACCCCAGTTTACGGAAAAAGTCCACCTTCATCTGCAGCTCGGAAGTAGGGGCCTCTTTAGCCACAGGATCCTGGTCTGGCTGAGGTCGA	chr4	125126778	125126959		8
Inflammation_2	chr4	TXA0447344	ZC3H12A_t1_4	AGTGAGGGTTCTAGAGTGGAAG	GATGAAGGTGGACTTTTTCCGTA	228	60	AGTGAGGGTTCTAGAGTGGAAGGCTTGGGGGTGCTTCCACCCCGGGGCACCAGAGGGGGCTGGGGGCTGGGGGCCGTCAGGGCCTGGCATTCTCGTTCAGTAGCTGAGCCATGCTTCACCAATTCCCCTAGCACCGTGTTGGTGTCTGCTTGGACTCCCAGCTTCTGCAGGACACTGTGGATCTCAGAGGACGAGTACCCCAGTTTACGGAAAAAGTCCACCTTCATC	chr4	125126675	125126902		2
Inflammation_2	chr4	TXA0447349	ZC3H12A_t1_3	CCCTCTCTGTCCTCCTCTG	GAGTCCAAGCAGACACCAA	178	63	CCCTCTCTGTCCTCCTCTGGGAGTGAGGGTTCTAGAGTGGAAGGCTTGGGGGTGCTTCCACCCCGGGGCACCAGAGGGGGCTGGGGGCTGGGGGCCGTCAGGGCCTGGCATTCTCGTTCAGTAGCTGAGCCATGCTTCACCAATTCCCCTAGCACCGTGTTGGTGTCTGCTTGGACTC	chr4	125126654	125126831		7
Inflammation_2	ZC3H12A	TXA0447343	ZC3H12A_t1_2	CCCAAAGGAAGAGCTACAGACAC	GGCTCAGCTACTGAACGAGAATG	226	62	CCCAAAGGAAGAGCTACAGACACTATTCCACAGGTCTCCACACATACCTCATGGCCACATTGCTTCCGTCGATGACCACAGGTCTCAGGTCGCTGCCCTCTCTGTCCTCCTCTGGGAGTGAGGGTTCTAGAGTGGAAGGCTTGGGGGTGCTTCCACCCCGGGGCACCAGAGGGGGCTGGGGGCTGGGGGCCGTCAGGGCCTGGCATTCTCGTTCAGTAGCTGAGCC	chr4	125126559	125126784		6
Inflammation_2	chr4	TXA0447348	ZC3H12A_t1_1	TTCACCAGTCCAAGAGAAAAGCC	CCCAGCCCCCTCTGGT	213	59	TTCACCAGTCCAAGAGAAAAGCCAAGCCCCCTTCCCAAAGGAAGAGCTACAGACACTATTCCACAGGTCTCCACACATACCTCATGGCCACATTGCTTCCGTCGATGACCACAGGTCTCAGGTCGCTGCCCTCTCTGTCCTCCTCTGGGAGTGAGGGTTCTAGAGTGGAAGGCTTGGGGGTGCTTCCACCCCGGGGCACCAGAGGGGGCTGGG	chr4	125126526	125126738		1
Inflammation_2	chr1	TXA0447516	TRAF5_t9_9	TGTAATCTGTCACCTTCCAG	GCATGTAGTAGTTCACAGGTAGT	215	52	TGTAATCTGTCACCTTCCAGATGAGCTTGCCACTGTAGCAGGCGCCCTCCAGCTGCTTAAACCGCTCTTCGTTCTTATTCAGCTGTGCTTTGTGGATATTAATGTGTGCGTCGTGCTTGCTGGTCTCCCCCTCTAAAAGAACTGGAAGGAAACACAGGACAGGAGGCTGCAGCTCGGGCCTGTCATCTGAGCACTACCTGTGAACTACTACATGC	chr1	191997867	191998081		7
Inflammation_2	TRAF5	TXA0447502	TRAF5_t9_8	GTAGAAAGGCTGGCTGAAGACG	CAGCCTCCTGTCCTGTGTTT	231	54	GTAGAAAGGCTGGCTGAAGACGGACACTGTGTGCCCCTCCACGGCCTCCCTCTTCTTCACCCTGTAATCTGTCACCTTCCAGATGAGCTTGCCACTGTAGCAGGCGCCCTCCAGCTGCTTAAACCGCTCTTCGTTCTTATTCAGCTGTGCTTTGTGGATATTAATGTGTGCGTCGTGCTTGCTGGTCTCCCCCTCTAAAAGAACTGGAAGGAAACACAGGACAGGAGGCTG	chr1	191997805	191998035		5
Inflammation_2	chr1	TXA0447518	TRAF5_t9_7	CTTCCCCGACCCGTCCC	GCGGTTTAAGCAGCTGGAGG	190	63	CTTCCCCGACCCGTCCCCGTTCAGGTACGCCCTGGCACAGAGCCGGTAGCCGCAGCGGCTGGTGTAGAAAGGCTGGCTGAAGACGGACACTGTGTGCCCCTCCACGGCCTCCCTCTTCTTCACCCTGTAATCTGTCACCTTCCAGATGAGCTTGCCACTGTAGCAGGCGCCCTCCAGCTGCTTAAACCGC	chr1	191997742	191997931		8
Inflammation_2	TRAF5	TXA0447503	TRAF5_t9_6	CACTGCAGCAGCGAGTCAAA	CAAGCTCATCTGGAAGGTGACAG	216	61	CACTGCAGCAGCGAGTCAAACTCACCGCGCATCACCACAAAGTACAGGGACAGGTGCGTTCCCTTCCCCGACCCGTCCCCGTTCAGGTACGCCCTGGCACAGAGCCGGTAGCCGCAGCGGCTGGTGTAGAAAGGCTGGCTGAAGACGGACACTGTGTGCCCCTCCACGGCCTCCCTCTTCTTCACCCTGTAATCTGTCACCTTCCAGATGAGCTTG	chr1	191997680	191997895		1
Inflammation_2	chr1	TXA0447514	TRAF5_t9_5	AATATGGTTCTTCTTGCCGCTCT	CGGCTACCGGCTCTGTG	175	61	AATATGGTTCTTCTTGCCGCTCTGGTCCAAAAGCATCAGGGTCACCCTCTGCCTGAACGGCCACTGCAGCAGCGAGTCAAACTCACCGCGCATCACCACAAAGTACAGGGACAGGTGCGTTCCCTTCCCCGACCCGTCCCCGTTCAGGTACGCCCTGGCACAGAGCCGGTAGCCG	chr1	191997619	191997793		3
Inflammation_2	TRAF5	TXA0447501	TRAF5_t9_4	CAGAGTAGAGTGCGACACAAAGC	GAAGGGAACGCACCTGTCC	232	56	CAGAGTAGAGTGCGACACAAAGCGGGGACAGCCAGAGGCAATGTTCATCTCGCCATCTGGCCTTTTGAAGCTGCTGCTGTTGGGGTCAGCTTTGAAGGTCTCCACAATATGGTTCTTCTTGCCGCTCTGGTCCAAAAGCATCAGGGTCACCCTCTGCCTGAACGGCCACTGCAGCAGCGAGTCAAACTCACCGCGCATCACCACAAAGTACAGGGACAGGTGCGTTCCCTTC	chr1	191997514	191997745		2
Inflammation_2	chr1	TXA0447517	TRAF5_t9_3	TTCAAGAACAGTGTGTCGTCTTT	GTGGCCGTTCAGGCAGAG	216	52	TTCAAGAACAGTGTGTCGTCTTTAATGTAGGTGTTCTTGGAGTTCTCCAGAGTAGAGTGCGACACAAAGCGGGGACAGCCAGAGGCAATGTTCATCTCGCCATCTGGCCTTTTGAAGCTGCTGCTGTTGGGGTCAGCTTTGAAGGTCTCCACAATATGGTTCTTCTTGCCGCTCTGGTCCAAAAGCATCAGGGTCACCCTCTGCCTGAACGGCCAC	chr1	191997467	191997682		6
Inflammation_2	TRAF5	TXA0447504	TRAF5_t9_2	GGACAGCCACACCTTTTCCT	CCAACAGCAGCAGCTTCAAAA	216	49	GGACAGCCACACCTTTTCCTGTGCTGAGAAGTTTCCTTATCAGGTAACACTACAGATCCTCCAAGTCAGTTAAATCCACGGCCACTTTCAAGAACAGTGTGTCGTCTTTAATGTAGGTGTTCTTGGAGTTCTCCAGAGTAGAGTGCGACACAAAGCGGGGACAGCCAGAGGCAATGTTCATCTCGCCATCTGGCCTTTTGAAGCTGCTGCTGTTGG	chr1	191997381	191997596		4
Inflammation_2	chr1	TXA0447515	TRAF5_t9_1	AGGAAGACAAGAACAAGAGCC	GGAGAACTCCAAGAACACCT	182	49	AGGAAGACAAGAACAAGAGCCTGCTCAGTCCAGAGGGCTGCGCCCAAGGGACAGCCACACCTTTTCCTGTGCTGAGAAGTTTCCTTATCAGGTAACACTACAGATCCTCCAAGTCAGTTAAATCCACGGCCACTTTCAAGAACAGTGTGTCGTCTTTAATGTAGGTGTTCTTGGAGTTCTCC	chr1	191997333	191997514		7
Inflammation_2	chr1	TXA0447534	TRAF5_t8_4	CTTGGCTGCTGGTTAACTATTTG	TGTGAAATGTTTGTGTTAAAATTCAG	170	46	CTTGGCTGCTGGTTAACTATTTGTAGCAGCTGCCGCACCTGCGCTTCCAGCCAAGCTGACTTGTCCGTGTGACTGGTGAGAGCCTTGCGGTACAAAAAAGAGAATATGTCTTGGAAACGAGACATCGGATTTGTAGCGTGTTGACTGAATTTTAACACAAACATTTCACA	chr1	191999884	192000053		6
Inflammation_2	TRAF5	TXA0447531	TRAF5_t8_3	ACCTAATCTCTGGTCACTGGCTT	AATTCAGTCAACACGCTACAAATC	239	50	ACCTAATCTCTGGTCACTGGCTTCCAGCTGGGTGATCCTCTGTTTCACGCTGTCAACCGCATCCACCAAAGACCTCAGATCAAGTCGACTTGGCTGCTGGTTAACTATTTGTAGCAGCTGCCGCACCTGCGCTTCCAGCCAAGCTGACTTGTCCGTGTGACTGGTGAGAGCCTTGCGGTACAAAAAAGAGAATATGTCTTGGAAACGAGACATCGGATTTGTAGCGTGTTGACTGAATT	chr1	191999796	192000034		2
Inflammation_2	chr1	TXA0447535	TRAF5_t8_2	ATGAGAGGGAACCCGACTGC	GACAAGTCAGCTTGGCTGGAAG	220	53	ATGAGAGGGAACCCGACTGCTTcatacacacacacacacacacacacacacacacacacacacacGTACCTAATCTCTGGTCACTGGCTTCCAGCTGGGTGATCCTCTGTTTCACGCTGTCAACCGCATCCACCAAAGACCTCAGATCAAGTCGACTTGGCTGCTGGTTAACTATTTGTAGCAGCTGCCGCACCTGCGCTTCCAGCCAAGCTGACTTGTC	chr1	191999729	191999948		8
Inflammation_2	TRAF5	TXA0447532	TRAF5_t8_1	GAAAGCTGGTTGTGACTTGTTAG	ACAAATAGTTAACCAGCAGCCAAG	235	50	GAAAGCTGGTTGTGACTTGTTAGCTTCTACCACAAATGCACACAGACAGGGAAGCCATGAGAGGGAACCCGACTGCTTcatacacacacacacacacacacacacacacacacacacacacGTACCTAATCTCTGGTCACTGGCTTCCAGCTGGGTGATCCTCTGTTTCACGCTGTCAACCGCATCCACCAAAGACCTCAGATCAAGTCGACTTGGCTGCTGGTTAACTATTTGT	chr1	191999673	191999907		1
Inflammation_2	chr1	TXA0447536	TRAF5_t7_2	AGAGTAGCCAAGTGTCAGCAATC	ACTGTGCTTTGCTTTTGTTTTGTG	180	53	AGAGTAGCCAAGTGTCAGCAATCCCCCTGCCCCTTCACATGTGGCCCCAAGACTCACCCGCTGTTCTAGTTGGTAGTTCTTCTCTAAAACCAGAAGCATGTGGTCCTGCAGGGCTGCCCGCTCATGCTCCAGCAAGTTCCCCCGCTTACCCTTCAACACAAAACAAAAGCAAAGCACAGT	chr1	192054293	192054472		8
Inflammation_2	TRAF5	TXA0447533	TRAF5_t7_1	ACCAAACCAAACCTAGAGTAGCC	TGCTGAGCTTCTTGTAACCACAT	227	51	ACCAAACCAAACCTAGAGTAGCCAAGTGTCAGCAATCCCCCTGCCCCTTCACATGTGGCCCCAAGACTCACCCGCTGTTCTAGTTGGTAGTTCTTCTCTAAAACCAGAAGCATGTGGTCCTGCAGGGCTGCCCGCTCATGCTCCAGCAAGTTCCCCCGCTTACCCTTCAACACAAAACAAAAGCAAAGCACAGTTACTAAGCTCATGTGGTTACAAGAAGCTCAGCA	chr1	192054279	192054505		7
Inflammation_2	chr1	TXA0447538	TRAF5_t6_2	CCGGTGAGCTGTAGAGGC	TTCTGTCCCTCACTTCCTTCCAA	220	50	CCGGTGAGCTGTAGAGGCAGAGATGAAGGTGACCCACAGCTTACCTTGACAGTGCAGCCATAGTGCTTAAAGGGACAGTCTTGCTCAGCCTCAGGACATACAGTAAGGTGTTCATTCACCTGCAAAATGGATAGCCTGTGATGTAGAGACACATGGATTCTTTAATAACTTGGTAGGGTCAGGGAGCCACGGGTGACTTGGAAGGAAGTGAGGGACAGAA	chr1	192057096	192057315		2
Inflammation_2	TRAF5	TXA0447537	TRAF5_t6_1	GTCTACCTTTCCCGTTCCTGAAG	GCTCCCTGACCCTACCAAGTTAT	235	46	GTCTACCTTTCCCGTTCCTGAAGAGAGTTAAAGAATAAAATCAACTCACCGGTGAGCTGTAGAGGCAGAGATGAAGGTGACCCACAGCTTACCTTGACAGTGCAGCCATAGTGCTTAAAGGGACAGTCTTGCTCAGCCTCAGGACATACAGTAAGGTGTTCATTCACCTGCAAAATGGATAGCCTGTGATGTAGAGACACATGGATTCTTTAATAACTTGGTAGGGTCAGGGAGC	chr1	192057048	192057282		1
Inflammation_2	chr1	TXA0447540	TRAF5_t5_2	CTCATCAAACCCTAAAGCCAGGA	TTGACTTTGTTTCCCACCCACTT	177	49	CTCATCAAACCCTAAAGCCAGGATTCTAACACTTGCCCTGCACTCTCCAGGGAGAGTTTACTCACCCTAGCTCTTGGAATAGTCTGCACACACCTGTTGGGACAAGACACTGGGTACGCAGGACACGAGTTTTCCTCATGATCCTGAAACAGACAAGTGGGTGGGAAACAAAGTCAA	chr1	192057910	192058086		4
Inflammation_2	TRAF5	TXA0447539	TRAF5_t5_1	CAGGCCTTTGGCTATCTATGGTT	TACCTTGAGGCAAGCGATCTTGA	219	49	CAGGCCTTTGGCTATCTATGGTTCTCATCAAACCCTAAAGCCAGGATTCTAACACTTGCCCTGCACTCTCCAGGGAGAGTTTACTCACCCTAGCTCTTGGAATAGTCTGCACACACCTGTTGGGACAAGACACTGGGTACGCAGGACACGAGTTTTCCTCATGATCCTGAAACAGACAAGTGGGTGGGAAACAAAGTCAAGATCGCTTGCCTCAAGGTA	chr1	192057887	192058105		3
Inflammation_2	chr1	TXA0447542	TRAF5_t4_4	TAAAGGCACTTCTCCTCTCG	GCACTGGGTCTCTCTGAC	240	59	TAAAGGCACTTCTCCTCTCGGAACCGGCAGTATGCGCTCAGGTGCTCTTTCACGTCTTTCCGGAGCATGGCTTCCCGGCAGCTCTCGTTAGGGCAGGGCACGGCTTGGAAGGAACAGTGCTGAAGGTGGTCCTGTGACAATGACAAAGGCCTCAGAGGTGGGGCCAGTGTAGGCAGGCTGGGCAGAGAGCTAAGTGCCATGTGGGCCAGCCTCTCTCTAGCTGTCAGAGAGACCCAGTGC	chr1	192059029	192059268		6
Inflammation_2	chr1	TXA0447543	TRAF5_t4_3	GTTGGTCACCACTATGTCCCTTT	CCACCTCTGAGGCCTTTGTC	189	57	GTTGGTCACCACTATGTCCCTTTTGCAGTAAAGGCACTTCTCCTCTCGGAACCGGCAGTATGCGCTCAGGTGCTCTTTCACGTCTTTCCGGAGCATGGCTTCCCGGCAGCTCTCGTTAGGGCAGGGCACGGCTTGGAAGGAACAGTGCTGAAGGTGGTCCTGTGACAATGACAAAGGCCTCAGAGGTGG	chr1	192059001	192059189		5
Inflammation_2	TRAF5	TXA0447541	TRAF5_t4_2	GGCTCCATCTGAGCTGTATTGTC	TTTGTCATTGTCACAGGACCACC	225	56	GGCTCCATCTGAGCTGTATTGTCACCCACAGTTCCTGCTCTCACCTGCAGGTTGGTCACCACTATGTCCCTTTTGCAGTAAAGGCACTTCTCCTCTCGGAACCGGCAGTATGCGCTCAGGTGCTCTTTCACGTCTTTCCGGAGCATGGCTTCCCGGCAGCTCTCGTTAGGGCAGGGCACGGCTTGGAAGGAACAGTGCTGAAGGTGGTCCTGTGACAATGACAAA	chr1	192058951	192059175		8
Inflammation_2	chr1	TXA0447544	TRAF5_t4_1	ACCCTCAAATTCAGTAAAAATAAGCA	ATGCTCCGGAAAGACGTGAA	186	52	ACCCTCAAATTCAGTAAAAATAAGCAAAGAACGCCCCCTGGGCTCCATCTGAGCTGTATTGTCACCCACAGTTCCTGCTCTCACCTGCAGGTTGGTCACCACTATGTCCCTTTTGCAGTAAAGGCACTTCTCCTCTCGGAACCGGCAGTATGCGCTCAGGTGCTCTTTCACGTCTTTCCGGAGCAT	chr1	192058911	192059096		7
Inflammation_2	TRAF5	TXA0447545	TRAF5_t3_2	TCACTAGAGGAATCCCATGGACA	CTCGAAGACCAATCTCACCAGAG	227	50	TCACTAGAGGAATCCCATGGACAGCATGGGTCTCAAGGATACCAACCTGGAATCGTCCCAGAATAATCCTGGCATTGCACCCGGGGGCGTTTTTGCAGTAGACGTGTAAATTGAGAACTTCTCTTTTGCAGCAGTTGTCTTTGAACACCTAAAAGACAGATGCGATCAGTCTCACGCCCTCCCGAGTGCGACTGTGAACGGAAGCTCTGGTGAGATTGGTCTTCGAG	chr1	192062596	192062822		6
Inflammation_2	chr1	TXA0447547	TRAF5_t3_1	GGATAAGTGGGTGTCACTAGAGGA	GCGTGAGACTGATCGCATCT	190	48	GGATAAGTGGGTGTCACTAGAGGAATCCCATGGACAGCATGGGTCTCAAGGATACCAACCTGGAATCGTCCCAGAATAATCCTGGCATTGCACCCGGGGGCGTTTTTGCAGTAGACGTGTAAATTGAGAACTTCTCTTTTGCAGCAGTTGTCTTTGAACACCTAAAAGACAGATGCGATCAGTCTCACGC	chr1	192062583	192062772		5
Inflammation_2	chr1	TXA0447548	TRAF5_t2_2	ATGGGTAATGAGGACAGTTCCAG	TCAGCCCTCTTTTTTGGTTTCCT	185	52	ATGGGTAATGAGGACAGTTCCAGACATTGTCCTATTCCAGCCTGGAAGTCACCCTGGTACCTTCTCCAACTCCCAAGCCAGAGCAGTGGCCTCCTCACCTCCTGAGGCTTGATGACCTCCTTGTCTACCGGGCAGATCGGCACCGAGTTCAATTCTCTAGAAAGGAAACCAAAAAAGAGGGCTGA	chr1	192066796	192066980		8
Inflammation_2	TRAF5	TXA0447546	TRAF5_t2_1	GCAGAGGACTATGGGTAATGAGG	TGCTCTTGGAAAGACTGTTGAGG	236	50	GCAGAGGACTATGGGTAATGAGGACAGTTCCAGACATTGTCCTATTCCAGCCTGGAAGTCACCCTGGTACCTTCTCCAACTCCCAAGCCAGAGCAGTGGCCTCCTCACCTCCTGAGGCTTGATGACCTCCTTGTCTACCGGGCAGATCGGCACCGAGTTCAATTCTCTAGAAAGGAAACCAAAAAAGAGGGCTGAAGTTAATTAAGTGTTTAACCTCAACAGTCTTTCCAAGAGCA	chr1	192066786	192067021		7
Inflammation_2	TRAF5	TXA0447550	TRAF5_t1_4	GAGTGGCAGAAGGCACATTTGTA	CATGTATGGTGGCTGCTGTTG	216	54	GAGTGGCAGAAGGCACATTTGTAGCGTTCTTCCAGCTGCTCCACAAACTGGTACTCGGTGTCGGGCTCAAAGTCCAAGGAAATTGAGTTGCCAGAGTTCTGGCGGATGAAGGCGCAGGGGACAGCCGCTTGCTCCTCCGAATGAGCCATTCTGGGGAGTCAGATGGGACACTTCAGTGTAAAATAACCACCCAGACAACAGCAGCCACCATACATG	chr1	192070486	192070701		5
Inflammation_2	chr1	TXA0490496	TRAF5_t1_3	CTGGTGGGGGTTGTGAAG	TCTGGGTGGTTATTTTACACTGA	217	55	CTGGTGGGGGTTGTGAAGCACGGAGTGGCAGAAGGCACATTTGTAGCGTTCTTCCAGCTGCTCCACAAACTGGTACTCGGTGTCGGGCTCAAAGTCCAAGGAAATTGAGTTGCCAGAGTTCTGGCGGATGAAGGCGCAGGGGACAGCCGCTTGCTCCTCCGAATGAGCCATTCTGGGGAGTCAGATGGGACACTTCAGTGTAAAATAACCACCCAGA	chr1	192070464	192070680		1
Inflammation_2	chr1	TXA0447554	TRAF5_t1_2	TTCTGGTCAGCGTCAGTCAGAG	CGACACCGAGTACCAGTTTGTG	175	61	TTCTGGTCAGCGTCAGTCAGAGCTGCAGGCGCTGCCCACTCACCTCAGAGACCGGATGCACTGCTGGCAGAAGCGGTGCCCGCAGCCGGTCTGGTGGGGGTTGTGAAGCACGGAGTGGCAGAAGGCACATTTGTAGCGTTCTTCCAGCTGCTCCACAAACTGGTACTCGGTGTCG	chr1	192070374	192070548		4
Inflammation_2	TRAF5	TXA0447549	TRAF5_t1_1	CAGACTCAGAAGCCAGGAACAC	CTTGGACTTTGAGCCCGACA	222	60	CAGACTCAGAAGCCAGGAACACCACCATCTGGTTCTGGTCAGCGTCAGTCAGAGCTGCAGGCGCTGCCCACTCACCTCAGAGACCGGATGCACTGCTGGCAGAAGCGGTGCCCGCAGCCGGTCTGGTGGGGGTTGTGAAGCACGGAGTGGCAGAAGGCACATTTGTAGCGTTCTTCCAGCTGCTCCACAAACTGGTACTCGGTGTCGGGCTCAAAGTCCAAG	chr1	192070342	192070563		6
Inflammation_2	chr10	TXA0447648	TRAF3IP2_t8_3	GACCTGGCTTCAGAACACTCAT	GCTGGCACTGAGCTGGAG	163	58	GACCTGGCTTCAGAACACTCATGTTTACAGCTGGCCCAAGAATAAGAAAAACATCCTGCTGCGGCTGCTCAGGGAGGAAGAGTATGTGGCTCCTCCCCGAGGCCCTCTGCCCACCCTTCAGGTGGTACCCTTGTGACGATGGCCACTCCAGCTCAGTGCCAGC	chr10	39654394	39654556		2
Inflammation_2	TRAF3IP2	TXA0447647	TRAF3IP2_t8_2	CTCCCTTCCGTGACCCTTGT	CCGCTAGAAGAATGCTGTGAGAA	240	57	CTCCCTTCCGTGACCCTTGTTCCTGCCCTCTCTTCCACAGGAGCATGTGCCGACCTGGCTTCAGAACACTCATGTTTACAGCTGGCCCAAGAATAAGAAAAACATCCTGCTGCGGCTGCTCAGGGAGGAAGAGTATGTGGCTCCTCCCCGAGGCCCTCTGCCCACCCTTCAGGTGGTACCCTTGTGACGATGGCCACTCCAGCTCAGTGCCAGCCTGTTCTCACAGCATTCTTCTAGCGG	chr10	39654343	39654582		3
Inflammation_2	chr10	TXA0447649	TRAF3IP2_t8_1	GAATCCAGGCTTCGCTCCC	GGAGGAGCCACATACTCTTCCTC	161	55	GAATCCAGGCTTCGCTCCCTTCCGTGACCCTTGTTCCTGCCCTCTCTTCCACAGGAGCATGTGCCGACCTGGCTTCAGAACACTCATGTTTACAGCTGGCCCAAGAATAAGAAAAACATCCTGCTGCGGCTGCTCAGGGAGGAAGAGTATGTGGCTCCTCC	chr10	39654329	39654489		7
Inflammation_2	chr10	TXA0447646	TRAF3IP2_t7_2	GGCTGGTAGTGTTGTTGACACAT	ATTGAGGACTGCTTGTTGGTTGG	178	42	GGCTGGTAGTGTTGTTGACACATCAACTCATCTTTGACCCTGGATTAAGTCTTCATATTTTTTGGTTTTAGATGCAGATTGAGTTCATAAGTCAGGGAAGCATGAACTTCAGATTCATCCCTGTGCTCTTCCCAAATGCCAAGAAGGTAAGCAAGCCAACCAACAAGCAGTCCTCAAT	chr10	39650835	39651012		4
Inflammation_2	TRAF3IP2	TXA0447644	TRAF3IP2_t7_1	TAAAGTTGTCCTGTGGGCTGGTA	CCAGGTAGTCATCAAGCCAGAC	235	41	TAAAGTTGTCCTGTGGGCTGGTAGTGTTGTTGACACATCAACTCATCTTTGACCCTGGATTAAGTCTTCATATTTTTTGGTTTTAGATGCAGATTGAGTTCATAAGTCAGGGAAGCATGAACTTCAGATTCATCCCTGTGCTCTTCCCAAATGCCAAGAAGGTAAGCAAGCCAACCAACAAGCAGTCCTCAATAATTCTATCTTTGTTTTCAAGTCTGGCTTGATGACTACCTGG	chr10	39650820	39651054		5
Inflammation_2	TRAF3IP2	TXA0447643	TRAF3IP2_t6_2	ACCATGCTTCCTGCTTCCATAAA	TGAAGAAACAACCCCCCTAGAGA	236	51	ACCATGCTTCCTGCTTCCATAAACATGCTTTCCTCCTTCTCATTACAGAAGACAGTGATGATAATCGTAGCAATCAGCCCCAAATACAAACAGGATGTGGAAGGCGCTGAGTCGCAGCTGGACGAGGACGAGCATGGCTTACATACTAAGTACATTCATCGGATGGTGAGTGAGGGACCACAGCGCCTGGCTCTTCCTCTGGGGCAGGCACCCTCTCTAGGGGGGTTGTTTCTTCA	chr10	39646801	39647036		4
Inflammation_2	chr10	TXA0447645	TRAF3IP2_t6_1	CCTTCACCAAACGAACCATGC	TGCCCCAGAGGAAGAGCC	220	50	CCTTCACCAAACGAACCATGCTTCCTGCTTCCATAAACATGCTTTCCTCCTTCTCATTACAGAAGACAGTGATGATAATCGTAGCAATCAGCCCCAAATACAAACAGGATGTGGAAGGCGCTGAGTCGCAGCTGGACGAGGACGAGCATGGCTTACATACTAAGTACATTCATCGGATGGTGAGTGAGGGACCACAGCGCCTGGCTCTTCCTCTGGGGCA	chr10	39646787	39647006		3
Inflammation_2	TRAF3IP2	TXA0447640	TRAF3IP2_t5_2	GCACTCGGAGAAAGCTCTCATTA	TCAGACTTGGGGAGAGTATCAGT	224	39	GCACTCGGAGAAAGCTCTCATTAAGAGCTCTTTTGCGCATCCTTTTCTTGTAGATTGACATATTTGAGGATAGAATCCGGGGTATTGATATCATTAAATGGATGGAGCGCTATCTTCGAGATGTAAGTATGTTCCAAAAATCTGAGGATGTGTGCTGGTGAGAAAAACAATTAGCTTGTGAAGATATTTCATAGTAGAAACACTGATACTCTCCCCAAGTCTGA	chr10	39645655	39645878		2
Inflammation_2	chr10	TXA0447642	TRAF3IP2_t5_1	TTGTGTTTTCTTGAGGTCTGCAC	ATTGTTTTTCTCACCAGCACACA	190	39	TTGTGTTTTCTTGAGGTCTGCACTCGGAGAAAGCTCTCATTAAGAGCTCTTTTGCGCATCCTTTTCTTGTAGATTGACATATTTGAGGATAGAATCCGGGGTATTGATATCATTAAATGGATGGAGCGCTATCTTCGAGATGTAAGTATGTTCCAAAAATCTGAGGATGTGTGCTGGTGAGAAAAACAAT	chr10	39645636	39645825		1
Inflammation_2	chr10	TXA0447641	TRAF3IP2_t4_2	AGACTGGCTGTGTAAAAAAGAAT	CTATCGTGTCCGACTGAACTG	205	40	AGACTGGCTGTGTAAAAAAGAATAATTCGATTGCTTTCAACAACTGTGAAAATTTTCTCTTAGGGAAAGTCTTTATCACTTATTCTATGGACACAGCCATGGAGGTGGTGAAATTTGTGAACTTTCTGTTGGTGAACGGCTTCCAAACTGCGGTAAGTACTCGATTCAAAGAGAAAAAGCTCTACAGTTCAGTCGGACACGATAG	chr10	39641243	39641447		2
Inflammation_2	TRAF3IP2	TXA0447639	TRAF3IP2_t4_1	AGGCAATGCATACTACATAGACTGG	ATTGTTGTTGTTGTTGCTATCGT	239	39	AGGCAATGCATACTACATAGACTGGCTGTGTAAAAAAGAATAATTCGATTGCTTTCAACAACTGTGAAAATTTTCTCTTAGGGAAAGTCTTTATCACTTATTCTATGGACACAGCCATGGAGGTGGTGAAATTTGTGAACTTTCTGTTGGTGAACGGCTTCCAAACTGCGGTAAGTACTCGATTCAAAGAGAAAAAGCTCTACAGTTCAGTCGGACACGATAGCAACAACAACAACAAT	chr10	39641225	39641463		1
Inflammation_2	chr10	TXA0447638	TRAF3IP2_t3_3	CTTGGACCTTCCTGCAGAGC	CTGAGCATGAAACCCCACAAGAA	175	54	CTTGGACCTTCCTGCAGAGCTGAGACCACATGGTCCCCAGGCTCCATCCCTAGCTGCCGTGCCTAGACCCCCTAGCAACCCCTTAGCCCGAGGAACTCTAAGAACCAGCAATTTGCCAGAAGAATTACGTGAGTTGTTTGCATCGTGGCTTCTTCTTGTGGGGTTTCATGCTCAG	chr10	39639271	39639445		8
Inflammation_2	TRAF3IP2	TXA0447636	TRAF3IP2_t3_2	GCTGTAAACATACTCCCTTGCAG	CAAGAAGAAGCCACGATGCAAAC	232	55	GCTGTAAACATACTCCCTTGCAGGGACCAGCTCTACCGCCCACCATCTAATGGAGTGGAAGCCCCTGAGGAGTCCTTGGACCTTCCTGCAGAGCTGAGACCACATGGTCCCCAGGCTCCATCCCTAGCTGCCGTGCCTAGACCCCCTAGCAACCCCTTAGCCCGAGGAACTCTAAGAACCAGCAATTTGCCAGAAGAATTACGTGAGTTGTTTGCATCGTGGCTTCTTCTTG	chr10	39639197	39639428		4
Inflammation_2	chr10	TXA0447637	TRAF3IP2_t3_1	TCTGTCTGCCTAAACTGTGTTTGT	TCTAGGCACGGCAGCTAGG	182	53	TCTGTCTGCCTAAACTGTGTTTGTGATGAAGATAAAAATTTGCTGTAAACATACTCCCTTGCAGGGACCAGCTCTACCGCCCACCATCTAATGGAGTGGAAGCCCCTGAGGAGTCCTTGGACCTTCCTGCAGAGCTGAGACCACATGGTCCCCAGGCTCCATCCCTAGCTGCCGTGCCTAGA	chr10	39639156	39639337		5
Inflammation_2	chr10	TXA0447628	TRAF3IP2_t2_4	GCCTGCTCTGCCTGGG	GGGGCGAGGGTGTCTTA	173	61	GCCTGCTCTGCCTGGGCAGGTCCTTCCTGGGGCAAGGGCAAGAGGCCCACGCCCTGTGCAGAAGGTCATCCTGAATGACTCCAGCCCCCAAGACCAAGAAGAGAGACCTGCACAGAGAGACTTCTCTTTCCCGAGGCTCCCGAGGTATGGGTATGGTAAGACACCCTCGCCCC	chr10	39634581	39634753		5
Inflammation_2	TRAF3IP2	TXA0447625	TRAF3IP2_t2_3	CAGCCTACCAGCAAGTACTCCAG	TTTGTTGCAGCCACATCCTTTTC	240	60	CAGCCTACCAGCAAGTACTCCAGCCTGCTCTGCCTGGGCAGGTCCTTCCTGGGGCAAGGGCAAGAGGCCCACGCCCTGTGCAGAAGGTCATCCTGAATGACTCCAGCCCCCAAGACCAAGAAGAGAGACCTGCACAGAGAGACTTCTCTTTCCCGAGGCTCCCGAGGTATGGGTATGGTAAGACACCCTCGCCCCCAACCCCACCACCCCCTCCCGTGAAAAGGATGTGGCTGCAACAAA	chr10	39634559	39634798		7
Inflammation_2	TRAF3IP2	TXA0447626	TRAF3IP2_t2_2	CTTGCATGTCTTTCGCATGAAGT	GCAGGTCTCTCTTCTTGGTCTTG	216	59	CTTGCATGTCTTTCGCATGAAGTAGCTGAGGACCACCTCTGCTCCTGTTGTGTTCACAGACGGCCATGGCTACCCTCCAGCAGCAGCCTACCAGCAAGTACTCCAGCCTGCTCTGCCTGGGCAGGTCCTTCCTGGGGCAAGGGCAAGAGGCCCACGCCCTGTGCAGAAGGTCATCCTGAATGACTCCAGCCCCCAAGACCAAGAAGAGAGACCTGC	chr10	39634476	39634691		3
Inflammation_2	chr10	TXA0447627	TRAF3IP2_t2_1	TTCAGCGAGCTTGCATGTCTTTC	GGGGCTGGAGTCATTCAGGA	202	60	TTCAGCGAGCTTGCATGTCTTTCGCATGAAGTAGCTGAGGACCACCTCTGCTCCTGTTGTGTTCACAGACGGCCATGGCTACCCTCCAGCAGCAGCCTACCAGCAAGTACTCCAGCCTGCTCTGCCTGGGCAGGTCCTTCCTGGGGCAAGGGCAAGAGGCCCACGCCCTGTGCAGAAGGTCATCCTGAATGACTCCAGCCCC	chr10	39634467	39634668		6
Inflammation_2	chr10	TXA0447632	TRAF3IP2_t1_9	TCAGACAAATCAGACCCAAGTTT	CTGCCTGATGCCCAGGA	180	61	TCAGACAAATCAGACCCAAGTTTACCTAATGCTTTGGCAGACTCCTTCAGTGGTGGCCAAGAGATGATgccccggccccggccccggcctgggccccACAGGCACAGGGCAGCCCCAGATGTGCCCACGATAGACACTGGCTATGATTCCCAGCCCCAAGATGTCCTGGGCATCAGGCAG	chr10	39626278	39626457		4
Inflammation_2	TRAF3IP2	TXA0447623	TRAF3IP2_t1_8	AAAACGCAATAGATGGCTGGGA	ACATCTTGGGGCTGGGAATCATA	225	57	AAAACGCAATAGATGGCTGGGATCTCAGCTTTCAGCAGCTTCTCCTGACACTGGCCATGAATCAGACAAATCAGACCCAAGTTTACCTAATGCTTTGGCAGACTCCTTCAGTGGTGGCCAAGAGATGATgccccggccccggccccggcctgggccccACAGGCACAGGGCAGCCCCAGATGTGCCCACGATAGACACTGGCTATGATTCCCAGCCCCAAGATGT	chr10	39626217	39626441		3
Inflammation_2	chr10	TXA0447630	TRAF3IP2_t1_7	TTTCCTCATGTTCCTCTGGAGCC	ATCATCTCTTGGCCACCACTGAA	211	52	TTTCCTCATGTTCCTCTGGAGCCAGCGAGCCTGAGTCTGAGCTCGGAGCCCTCCCTCCAGAGCATCGGTTCACACTTACGGAAAAACGCAATAGATGGCTGGGATCTCAGCTTTCAGCAGCTTCTCCTGACACTGGCCATGAATCAGACAAATCAGACCCAAGTTTACCTAATGCTTTGGCAGACTCCTTCAGTGGTGGCCAAGAGATGAT	chr10	39626135	39626345		2
Inflammation_2	TRAF3IP2	TXA0447624	TRAF3IP2_t1_6	CTGCCTGCGAGCTAAAGTCC	GGGTCTGATTTGTCTGATTCATGG	234	53	CTGCCTGCGAGCTAAAGTCCTGGAGGAAGGTGAAGCCAGTTTCTTTAGAAGGCACCCTGAACTTGGCAAAGATATTTCCTCATGTTCCTCTGGAGCCAGCGAGCCTGAGTCTGAGCTCGGAGCCCTCCCTCCAGAGCATCGGTTCACACTTACGGAAAAACGCAATAGATGGCTGGGATCTCAGCTTTCAGCAGCTTCTCCTGACACTGGCCATGAATCAGACAAATCAGACCC	chr10	39626061	39626294		6
Inflammation_2	chr10	TXA0447634	TRAF3IP2_t1_5	GAAACTGGCAAACCACCAG	AAGTGTGAACCGATGCTCT	190	54	GAAACTGGCAAACCACCAGCCTGTGTCACAACAGGTCACCTGCCTGCGAGCTAAAGTCCTGGAGGAAGGTGAAGCCAGTTTCTTTAGAAGGCACCCTGAACTTGGCAAAGATATTTCCTCATGTTCCTCTGGAGCCAGCGAGCCTGAGTCTGAGCTCGGAGCCCTCCCTCCAGAGCATCGGTTCACACTT	chr10	39626022	39626211		8
Inflammation_2	TRAF3IP2	TXA0447620	TRAF3IP2_t1_4	AACCGATCCCAGAATACTCTCCA	GCTCCAGAGGAACATGAGGAAAT	238	53	AACCGATCCCAGAATACTCTCCAGAAGAGGAATTGGAACCACCTGCCCCCAATACAAGGAACATGGCACCCAGCAGCTTGTCTGTGCTCCAGTGCCCTCCCCTGAAACTGGCAAACCACCAGCCTGTGTCACAACAGGTCACCTGCCTGCGAGCTAAAGTCCTGGAGGAAGGTGAAGCCAGTTTCTTTAGAAGGCACCCTGAACTTGGCAAAGATATTTCCTCATGTTCCTCTGGAGC	chr10	39625919	39626156		7
Inflammation_2	chr10	TXA0447631	TRAF3IP2_t1_3	GAGTCAATTGCTGAAACCGATCC	AGGGTGCCTTCTAAAGAAACTGG	214	54	GAGTCAATTGCTGAAACCGATCCCAGAATACTCTCCAGAAGAGGAATTGGAACCACCTGCCCCCAATACAAGGAACATGGCACCCAGCAGCTTGTCTGTGCTCCAGTGCCCTCCCCTGAAACTGGCAAACCACCAGCCTGTGTCACAACAGGTCACCTGCCTGCGAGCTAAAGTCCTGGAGGAAGGTGAAGCCAGTTTCTTTAGAAGGCACCCT	chr10	39625905	39626118		5
Inflammation_2	chr10	TXA0447635	TRAF3IP2_t1_2	ATCTTCTGAGACTGGCATGTTTT	CTGGGTGCCATGTTCCTTGTATT	177	47	ATCTTCTGAGACTGGCATGTTTTCTCTTGTTTCAGAAACTAGAATGAACCGAAGCATTCCCGTGGAGGTTGATGAATCAGAACCATTCCCGAGTCAATTGCTGAAACCGATCCCAGAATACTCTCCAGAAGAGGAATTGGAACCACCTGCCCCCAATACAAGGAACATGGCACCCAG	chr10	39625815	39625991		1
Inflammation_2	chr10	TXA0447633	TRAF3IP2_t1_13	GCCTCTGAGGTCCAGGGAA	GCAGTGTTGTGAGGTCTCGTTT	217	58	GCCTCTGAGGTCCAGGGAATTGCCACCTCAGTTTGAACTTGAGAGGTATCCAATGAACGCCCAGCTGCTGCCGCCCCATCCTTCCCCACAGGCCCCATGGAACTGTCAGTACTACTGCCCCGGAGGGCCCTACCACCACCAGGTGCCACGTAAGTTATCCTTACCGCTTCTGGACGTTCTGGACTAGGACTGAGGAAACGAGACCTCACAACACTGC	chr10	39626511	39626727		5
Inflammation_2	TRAF3IP2	TXA0447619	TRAF3IP2_t1_12	CATTGCCCCTCACCTCCTC	TCCTAGTCCAGAACGTCCAGAAG	232	59	CATTGCCCCTCACCTCCTCGTGTTACCTGCAGGACCTCCCTGGGCCTCTGAGGTCCAGGGAATTGCCACCTCAGTTTGAACTTGAGAGGTATCCAATGAACGCCCAGCTGCTGCCGCCCCATCCTTCCCCACAGGCCCCATGGAACTGTCAGTACTACTGCCCCGGAGGGCCCTACCACCACCAGGTGCCACGTAAGTTATCCTTACCGCTTCTGGACGTTCTGGACTAGGA	chr10	39626468	39626699		7
Inflammation_2	chr10	TXA0447629	TRAF3IP2_t1_11	CAGATGTGCCCACGATAGACACT	GGCGTTCATTGGATACCTCTCAA	179	57	CAGATGTGCCCACGATAGACACTGGCTATGATTCCCAGCCCCAAGATGTCCTGGGCATCAGGCAGTTGGAGAGGCCATTGCCCCTCACCTCCTCGTGTTACCTGCAGGACCTCCCTGGGCCTCTGAGGTCCAGGGAATTGCCACCTCAGTTTGAACTTGAGAGGTATCCAATGAACGCC	chr10	39626393	39626571		6
Inflammation_2	chr10	TXA0447621	TRAF3IP2_t1_10	CTTTGGCAGACTCCTTCAGT	GTTCAAACTGAGGTGGCAAT	240	63	CTTTGGCAGACTCCTTCAGTGGTGGCCAAGAGATGATgccccggccccggccccggcctgggccccACAGGCACAGGGCAGCCCCAGATGTGCCCACGATAGACACTGGCTATGATTCCCAGCCCCAAGATGTCCTGGGCATCAGGCAGTTGGAGAGGCCATTGCCCCTCACCTCCTCGTGTTACCTGCAGGACCTCCCTGGGCCTCTGAGGTCCAGGGAATTGCCACCTCAGTTTGAAC	chr10	39626309	39626548		1
Inflammation_2	TRAF3IP2	TXA0447622	TRAF3IP2_t1_1	GGTCATAAAATGGGAACTCCAAGC	ACTGGAGCACAGACAAGCTG	229	47	GGTCATAAAATGGGAACTCCAAGCACTGATCTATCTTCTGAGACTGGCATGTTTTCTCTTGTTTCAGAAACTAGAATGAACCGAAGCATTCCCGTGGAGGTTGATGAATCAGAACCATTCCCGAGTCAATTGCTGAAACCGATCCCAGAATACTCTCCAGAAGAGGAATTGGAACCACCTGCCCCCAATACAAGGAACATGGCACCCAGCAGCTTGTCTGTGCTCCAGT	chr10	39625783	39626011		6
Inflammation_2	PIGR	TXA0447436	PIGR_t9_2	CAGATGGGTAAGCGCTAAGGATA	TAGCATCTTCCTTCCCTGTTTGG	222	51	CAGATGGGTAAGCGCTAAGGATACTCTCTCTCTCTCCATGCAGAAATCGTGACTACCACGGAGTGCACCGCTGAGCCAGAAGAATCCAAGAAAGCAAAAAGGGTAAGAGAGAAAGATGTCCCACTGCATGACGGGGAGTTCAGACTGCAGTTTGACATCAGGACAAAGTCACCCCCACATGGAGTCTGACTCCCAGCCCCCAAACAGGGAAGGAAGATGCTA	chr1	130849688	130849909		2
Inflammation_2	chr1	TXA0447439	PIGR_t9_1	GGAAGGAAGACAGATGGGTAAGC	ACTTTGTCCTGATGTCAAACTGC	179	49	GGAAGGAAGACAGATGGGTAAGCGCTAAGGATACTCTCTCTCTCTCCATGCAGAAATCGTGACTACCACGGAGTGCACCGCTGAGCCAGAAGAATCCAAGAAAGCAAAAAGGGTAAGAGAGAAAGATGTCCCACTGCATGACGGGGAGTTCAGACTGCAGTTTGACATCAGGACAAAGT	chr1	130849678	130849856		1
Inflammation_2	chr1	TXA0491119	PIGR_t8_2	CCTAACCCATGGTCCTATTCTC	CCTTCCTGGATGGAGCAGAT	240	49	CCTAACCCATGGTCCTATTCTCTCACGACTCTTCTGCCAAACAGACCGCATGTCAATCAGCAGCTACAGGACAGACATTAGCATGGCAGACTTCAAGAACTCCAGAGATTTGGGAGGCAATGACAACATGGGGGCCTCTCCAGACACACAGCAAACAGTCATCGAAGGAAAAGATGGTATGTATCTCTAGAATGCCCAGGCTTTGGAAGAACAGAAGTGGATCTGCTCCATCCAGGAAGG	chr1	130849444	130849683	Assays designed by relax mode and have no off-target hits	7
Inflammation_2	PIGR	TXA0447434	PIGR_t8_1	TAACACACCCTGCTTTCCTAACC	TCCACTTCTGTTCTTCCAAAGCC	237	48	TAACACACCCTGCTTTCCTAACCCATGGTCCTATTCTCTCACGACTCTTCTGCCAAACAGACCGCATGTCAATCAGCAGCTACAGGACAGACATTAGCATGGCAGACTTCAAGAACTCCAGAGATTTGGGAGGCAATGACAACATGGGGGCCTCTCCAGACACACAGCAAACAGTCATCGAAGGAAAAGATGGTATGTATCTCTAGAATGCCCAGGCTTTGGAAGAACAGAAGTGGA	chr1	130849428	130849664		8
Inflammation_2	PIGR	TXA0447433	PIGR_t7_2	CCTGATCTTGCTCTCAATAGTGG	CCATACCAGAGTCACATAGCTG	240	57	CCTGATCTTGCTCTCAATAGTGGGCTGACTTAATCCCTCTTGCAGTGCTGATGGACAAAGCAGGAGCTCCAGCTCCAAAGTGCTGTTCTCCACCCTGGTGCCCCTGGGTCTGGTGCTGGCAGTGGGTGCTATAGCTGTGTGGGTGGCCAGAGTCCGACATCGGAAGAATGTAGGTGAGTACCCAGGATGCTCCCCACCCCGCCTCCAGCTCAGCTAATCAGCTATGTGACTCTGGTATGG	chr1	130848946	130849185		4
Inflammation_2	chr1	TXA0447435	PIGR_t7_1	CTGGGTAGCCCCTGATCTTG	GTGGGGAGCATCCTGGGTA	207	57	CTGGGTAGCCCCTGATCTTGCTCTCAATAGTGGGCTGACTTAATCCCTCTTGCAGTGCTGATGGACAAAGCAGGAGCTCCAGCTCCAAAGTGCTGTTCTCCACCCTGGTGCCCCTGGGTCTGGTGCTGGCAGTGGGTGCTATAGCTGTGTGGGTGGCCAGAGTCCGACATCGGAAGAATGTAGGTGAGTACCCAGGATGCTCCCCAC	chr1	130848936	130849142		3
Inflammation_2	chr1	TXA0447429	PIGR_t6_4	AAGTCGCTCTGGAAGAAGAGGTA	AGTGATCCAGACTTGGAGCCTA	211	52	AAGTCGCTCTGGAAGAAGAGGTAGTGGACTCCTCCATCAGTGAAAAAGAGAACAAAGCCATTCCAAATCCCGGGCCTTTTGCCAACGAAAGAGAGATACAGAATGTGGGAGACCAAGCTCAGGAGAACAGAGCATCTGGGGATGCTGGCAGGTGAGCAGATTCCCCACCACAGAGAACACTCCAGAGGCTAGGCTCCAAGTCTGGATCACT	chr1	130848480	130848690		1
Inflammation_2	PIGR	TXA0447427	PIGR_t6_3	CATCCCATGTCAACCCAACAGAT	CCTAGCCTCTGGAGTGTTCTCT	232	52	CATCCCATGTCAACCCAACAGATGCAAATGCACGTGCCAAAGTCGCTCTGGAAGAAGAGGTAGTGGACTCCTCCATCAGTGAAAAAGAGAACAAAGCCATTCCAAATCCCGGGCCTTTTGCCAACGAAAGAGAGATACAGAATGTGGGAGACCAAGCTCAGGAGAACAGAGCATCTGGGGATGCTGGCAGGTGAGCAGATTCCCCACCACAGAGAACACTCCAGAGGCTAGG	chr1	130848441	130848672		2
Inflammation_2	chr1	TXA0447428	PIGR_t6_2	CCTGTAACCCACAGGCATAAGAA	CCCGGGATTTGGAATGGCTT	187	47	CCTGTAACCCACAGGCATAAGAACACAGAGAAAAAAAAAAACATAACCAGCTTTGTTCTGCTCTGCTCCAGGGTCATCCCATGTCAACCCAACAGATGCAAATGCACGTGCCAAAGTCGCTCTGGAAGAAGAGGTAGTGGACTCCTCCATCAGTGAAAAAGAGAACAAAGCCATTCCAAATCCCGGG	chr1	130848367	130848553		5
Inflammation_2	PIGR	TXA0447426	PIGR_t6_1	AAGATCTCACCCCGTGATTTTCC	CTCTCTTTCGTTGGCAAAAGGC	229	47	AAGATCTCACCCCGTGATTTTCCTGTAACCCACAGGCATAAGAACACAGAGAAAAAAAAAAACATAACCAGCTTTGTTCTGCTCTGCTCCAGGGTCATCCCATGTCAACCCAACAGATGCAAATGCACGTGCCAAAGTCGCTCTGGAAGAAGAGGTAGTGGACTCCTCCATCAGTGAAAAAGAGAACAAAGCCATTCCAAATCCCGGGCCTTTTGCCAACGAAAGAGAG	chr1	130848346	130848574		6
Inflammation_2	PIGR	TXA0447425	PIGR_t5_6	CTTCTGTGAGCTGCGACCA	CCTTTCATAAGCCTCGCCATGAG	218	56	CTTCTGTGAGCTGCGACCAGAGCAGCCAGCTGGTCTCCATGACCCTGAACCCGGTCAGTAAGGAAGATGAAGGCTGGTACTGGTGTGGGGTAAAGCAAGGCCAGACCTATGGAGAAACTACCGCCATCTATATAGCAGTTGAAGAGAGGACCAGAGGTGAGTTCCAAGGGCAGTCAGTGCCAGCCCCCACGGTACCTCATGGCGAGGCTTATGAAAGG	chr1	130847390	130847607		3
Inflammation_2	chr1	TXA0447430	PIGR_t5_5	ATCCTGCCAAGCCATGACG	GCACTGACTGCCCTTGGAA	214	55	ATCCTGCCAAGCCATGACGAAGGTGCCCGCCAATCTTCTGTGAGCTGCGACCAGAGCAGCCAGCTGGTCTCCATGACCCTGAACCCGGTCAGTAAGGAAGATGAAGGCTGGTACTGGTGTGGGGTAAAGCAAGGCCAGACCTATGGAGAAACTACCGCCATCTATATAGCAGTTGAAGAGAGGACCAGAGGTGAGTTCCAAGGGCAGTCAGTGC	chr1	130847356	130847569		1
Inflammation_2	chr1	TXA0447431	PIGR_t5_4	TTCTACTCCCAGGAGAAATACTG	CTTGCTTTACCCCACACCA	184	55	TTCTACTCCCAGGAGAAATACTGGTGCAAGTGGAGCAACAAGGGTTGCCACATCCTGCCAAGCCATGACGAAGGTGCCCGCCAATCTTCTGTGAGCTGCGACCAGAGCAGCCAGCTGGTCTCCATGACCCTGAACCCGGTCAGTAAGGAAGATGAAGGCTGGTACTGGTGTGGGGTAAAGCAAG	chr1	130847305	130847488		6
Inflammation_2	PIGR	TXA0447424	PIGR_t5_3	ACAGCAGTACTAGGAGAGACCTT	CACCAGTACCAGCCTTCATCTTC	221	55	ACAGCAGTACTAGGAGAGACCTTCACCGTTTCCTGCCACTATCCGTGCAAATTCTACTCCCAGGAGAAATACTGGTGCAAGTGGAGCAACAAGGGTTGCCACATCCTGCCAAGCCATGACGAAGGTGCCCGCCAATCTTCTGTGAGCTGCGACCAGAGCAGCCAGCTGGTCTCCATGACCCTGAACCCGGTCAGTAAGGAAGATGAAGGCTGGTACTGGTG	chr1	130847254	130847474		5
Inflammation_2	chr1	TXA0447432	PIGR_t5_2	GTGTCCATGTCTTCCTGCTCC	TCATGGCTTGGCAGGATGTG	201	56	GTGTCCATGTCTTCCTGCTCCTCCTCCCCCCACCCCCGCAGCTACAAGGGAGCCAAACCTTGAGGTGACGCCACAGAACGCAACAGCAGTACTAGGAGAGACCTTCACCGTTTCCTGCCACTATCCGTGCAAATTCTACTCCCAGGAGAAATACTGGTGCAAGTGGAGCAACAAGGGTTGCCACATCCTGCCAAGCCATGA	chr1	130847172	130847372		2
Inflammation_2	PIGR	TXA0447423	PIGR_t5_1	CACTAACGCCACCACTCTCTTTC	GTTGCTCCACTTGCACCAGTAT	224	54	CACTAACGCCACCACTCTCTTTCCCCTGTAGCATCTCCAAGTCTTAATTTCTGTGTCCATGTCTTCCTGCTCCTCCTCCCCCCACCCCCGCAGCTACAAGGGAGCCAAACCTTGAGGTGACGCCACAGAACGCAACAGCAGTACTAGGAGAGACCTTCACCGTTTCCTGCCACTATCCGTGCAAATTCTACTCCCAGGAGAAATACTGGTGCAAGTGGAGCAAC	chr1	130847120	130847343		8
Inflammation_2	chr1	TXA0447415	PIGR_t4_6	GCCGACTGGCACTGTTTGAT	GATGGTCTTCAGCCTCCTCCC	183	54	GCCGACTGGCACTGTTTGATCAGCCAGGCAATGGTACTTACACTGTCATCCTCAACCAGCTCACCACCGAGGATGCTGGCTTCTATTGGTGTCTTACCAATGGTGACTCTCGCTGGAGAACCACAATAGAACTCCAGGTTGCCGAAGGTGAGAGCAGGTGGAGGGAGGAGGCTGAAGACCATC	chr1	130846513	130846695		7
Inflammation_2	PIGR	TXA0447410	PIGR_t4_5	GAAGAGTATGAAGGCCGACTGG	CCTAGCAGAGAAGATGTCTAGGGA	239	52	GAAGAGTATGAAGGCCGACTGGCACTGTTTGATCAGCCAGGCAATGGTACTTACACTGTCATCCTCAACCAGCTCACCACCGAGGATGCTGGCTTCTATTGGTGTCTTACCAATGGTGACTCTCGCTGGAGAACCACAATAGAACTCCAGGTTGCCGAAGGTGAGAGCAGGTGGAGGGAGGAGGCTGAAGACCATCCTAATAGTAGCAGTCGCATTCCCTAGACATCTTCTCTGCTAGG	chr1	130846500	130846738		4
Inflammation_2	chr1	TXA0447414	PIGR_t4_4	ACCCCAAGGAAAGCAGCAG	GGTGAGCTGGTTGAGGATGAC	176	57	ACCCCAAGGAAAGCAGCAGCCTCAAGTACTGGTGTCGCTGGGAAGGGGACGGAAATGGACATTGCCCCGTGCTTGTGGGGACCCAGGCCCAGGTGCAAGAAGAGTATGAAGGCCGACTGGCACTGTTTGATCAGCCAGGCAATGGTACTTACACTGTCATCCTCAACCAGCTCACC	chr1	130846402	130846577		6
Inflammation_2	chr1	TXA0447411	PIGR_t4_3	GTCCCTATAACCCCAAGGAAAG	TTGGTAAGACACCAATAGAAGCC	220	55	GTCCCTATAACCCCAAGGAAAGCAGCAGCCTCAAGTACTGGTGTCGCTGGGAAGGGGACGGAAATGGACATTGCCCCGTGCTTGTGGGGACCCAGGCCCAGGTGCAAGAAGAGTATGAAGGCCGACTGGCACTGTTTGATCAGCCAGGCAATGGTACTTACACTGTCATCCTCAACCAGCTCACCACCGAGGATGCTGGCTTCTATTGGTGTCTTACCAA	chr1	130846393	130846612		1
Inflammation_2	PIGR	TXA0447412	PIGR_t4_2	TGGGTTATTCAGTCCTTTCACCC	GCCTTCATACTCTTCTTGCACCT	232	56	TGGGTTATTCAGTCCTTTCACCCCATCTCCGTCTGTACTTCCAGAGTCTACCATTCCCAATCGTCGCTCTGTTGTGAAGGGAGTCACAGGAGGCTCTGTGGCCATCGCCTGTCCCTATAACCCCAAGGAAAGCAGCAGCCTCAAGTACTGGTGTCGCTGGGAAGGGGACGGAAATGGACATTGCCCCGTGCTTGTGGGGACCCAGGCCCAGGTGCAAGAAGAGTATGAAGGC	chr1	130846283	130846514		5
Inflammation_2	chr1	TXA0447413	PIGR_t4_1	AAGACTATTTGGGTTATTCAGTCCT	ATGTCCATTTCCGTCCCCTTC	190	53	AAGACTATTTGGGTTATTCAGTCCTTTCACCCCATCTCCGTCTGTACTTCCAGAGTCTACCATTCCCAATCGTCGCTCTGTTGTGAAGGGAGTCACAGGAGGCTCTGTGGCCATCGCCTGTCCCTATAACCCCAAGGAAAGCAGCAGCCTCAAGTACTGGTGTCGCTGGGAAGGGGACGGAAATGGACAT	chr1	130846274	130846463		3
Inflammation_2	chr1	TXA0447416	PIGR_t3_9	GTGGCAAACGAGGCCAAATATC	TAGTGCCCTGCATCCTCCTT	179	52	GTGGCAAACGAGGCCAAATATCTGTGCCGGATGAATAAGGAAACCTGTGATGTGATCATTAACACCCTGGGGAAGAGGGATCCAGACTTTGAGGGCAGGATCCTGATAACCCCCAAGGATGACAATGGCCGCTTCAGTGTGTTGATCACAGGCCTGAGGAAGGAGGATGCAGGGCACTA	chr1	130844833	130845011		3
Inflammation_2	PIGR	TXA0447409	PIGR_t3_8	CCTGAGCCAGAGCTGCTTTAT	CTGTGATCAACACACTGAAGCG	220	51	CCTGAGCCAGAGCTGCTTTATAAAGACCTGAGGTCCTCAGTGACTTTTGAATGTGACCTGGGCCGTGAGGTGGCAAACGAGGCCAAATATCTGTGCCGGATGAATAAGGAAACCTGTGATGTGATCATTAACACCCTGGGGAAGAGGGATCCAGACTTTGAGGGCAGGATCCTGATAACCCCCAAGGATGACAATGGCCGCTTCAGTGTGTTGATCACAG	chr1	130844764	130844983		5
Inflammation_2	chr1	TXA0447420	PIGR_t3_7	GGTCCTAGTGCTGATAAGAAGAATGT	CTCAAAGTCTGGATCCCTCTTCC	207	50	GGTCCTAGTGCTGATAAGAAGAATGTTGACCTCCAGGTGCTAGCGCCTGAGCCAGAGCTGCTTTATAAAGACCTGAGGTCCTCAGTGACTTTTGAATGTGACCTGGGCCGTGAGGTGGCAAACGAGGCCAAATATCTGTGCCGGATGAATAAGGAAACCTGTGATGTGATCATTAACACCCTGGGGAAGAGGGATCCAGACTTTGAG	chr1	130844719	130844925		8
Inflammation_2	PIGR	TXA0447406	PIGR_t3_6	AAGCTGGAGAAGGTCCTAGTG	ATGATCACATCACAGGTTTCCTTA	184	49	AAGCTGGAGAAGGTCCTAGTGCTGATAAGAAGAATGTTGACCTCCAGGTGCTAGCGCCTGAGCCAGAGCTGCTTTATAAAGACCTGAGGTCCTCAGTGACTTTTGAATGTGACCTGGGCCGTGAGGTGGCAAACGAGGCCAAATATCTGTGCCGGATGAATAAGGAAACCTGTGATGTGATCAT	chr1	130844708	130844891		7
Inflammation_2	chr1	TXA0447404	PIGR_t3_5	GCGAACTTGTCATTGACTCTAC	TTATAAAGCAGCTCTGGCTCAGG	223	46	GCGAACTTGTCATTGACTCTACTGAGAAGGTGAACCCCAGCTATATAGGCAGAGCAAAACTTTTTATGAAAGGGACCGACCTAACTGTATTCTATGTCAACATTAGTCACCTAACGCACAATGATGCTGGGCTGTACATCTGCCAAGCTGGAGAAGGTCCTAGTGCTGATAAGAAGAATGTTGACCTCCAGGTGCTAGCGCCTGAGCCAGAGCTGCTTTATAA	chr1	130844564	130844786		1
Inflammation_2	chr1	TXA0447422	PIGR_t3_4	ATAGGCAGAAATGTGACCATTGA	TGTTGACATAGAATACAGTTAGGT	190	43	ATAGGCAGAAATGTGACCATTGAATGCCCTTTCAAAAGGGAGAATGCTCCCAGCAAGAAATCCCTGTGTAAGAAGACAAACCAGTCCTGCGAACTTGTCATTGACTCTACTGAGAAGGTGAACCCCAGCTATATAGGCAGAGCAAAACTTTTTATGAAAGGGACCGACCTAACTGTATTCTATGTCAACA	chr1	130844476	130844665		8
Inflammation_2	chr1	TXA0447407	PIGR_t3_3	TACACAAAGGACATAGGCAGAAA	CCAGCATCATTGTGCGTTAG	230	43	TACACAAAGGACATAGGCAGAAATGTGACCATTGAATGCCCTTTCAAAAGGGAGAATGCTCCCAGCAAGAAATCCCTGTGTAAGAAGACAAACCAGTCCTGCGAACTTGTCATTGACTCTACTGAGAAGGTGAACCCCAGCTATATAGGCAGAGCAAAACTTTTTATGAAAGGGACCGACCTAACTGTATTCTATGTCAACATTAGTCACCTAACGCACAATGATGCTGG	chr1	130844464	130844693		2
Inflammation_2	PIGR	TXA0447408	PIGR_t3_2	TCGCTGGGTATAACTAACAGTGC	CAGTAGAGTCAATGACAAGTTCGC	225	44	TCGCTGGGTATAACTAACAGTGCAATGTTACAAAACAAAAATTGTAACTTACCCCTGTCCTTCATTCCACAGTTCCTGAGTTGCCGAGTGACACCCACGTCTACACAAAGGACATAGGCAGAAATGTGACCATTGAATGCCCTTTCAAAAGGGAGAATGCTCCCAGCAAGAAATCCCTGTGTAAGAAGACAAACCAGTCCTGCGAACTTGTCATTGACTCTACTG	chr1	130844363	130844587		4
Inflammation_2	chr1	TXA0447418	PIGR_t3_11	GGATCCTGATAACCCCCAAGGAT	GTCTCACCTGCCATCTCATGC	213	55	GGATCCTGATAACCCCCAAGGATGACAATGGCCGCTTCAGTGTGTTGATCACAGGCCTGAGGAAGGAGGATGCAGGGCACTACCAGTGTGGAGCCCACAGTTCTGGTTTGCCTCAAGAAGGCTGGCCCATCCAGACTTGGCAACTCTTTGTCAATGAAGGTGAGAACCTCCAAAAGAGAAGTGGGGGGGGGGGCATGAGATGGCAGGTGAGAC	chr1	130844930	130845142		4
Inflammation_2	chr1	TXA0447405	PIGR_t3_10	GTGATGTGATCATTAACACCCTG	CCCACTTCTCTTTTGGAGGTT	236	53	GTGATGTGATCATTAACACCCTGGGGAAGAGGGATCCAGACTTTGAGGGCAGGATCCTGATAACCCCCAAGGATGACAATGGCCGCTTCAGTGTGTTGATCACAGGCCTGAGGAAGGAGGATGCAGGGCACTACCAGTGTGGAGCCCACAGTTCTGGTTTGCCTCAAGAAGGCTGGCCCATCCAGACTTGGCAACTCTTTGTCAATGAAGGTGAGAACCTCCAAAAGAGAAGTGGG	chr1	130844879	130845114		6
Inflammation_2	chr1	TXA0447421	PIGR_t3_1	CATTCTAAGTCACTAGACTACCC	CTTCTTACACAGGGATTTCTTGC	218	45	CATTCTAAGTCACTAGACTACCCTGGACCCTCGCTGGGTATAACTAACAGTGCAATGTTACAAAACAAAAATTGTAACTTACCCCTGTCCTTCATTCCACAGTTCCTGAGTTGCCGAGTGACACCCACGTCTACACAAAGGACATAGGCAGAAATGTGACCATTGAATGCCCTTTCAAAAGGGAGAATGCTCCCAGCAAGAAATCCCTGTGTAAGAAG	chr1	130844333	130844550		6
Inflammation_2	chr1	TXA0447400	PIGR_t2_6	GCAGAGCCAACCTCATCAACT	GCCCGGGATGCCTGAAAT	173	55	GCAGAGCCAACCTCATCAACTTCCCAGAGAACAACACATTTGTGATTAACATTGAGCAGCTCACCCAGGACGACACTGGGAGCTACAAGTGTGGCCTGGGTACCAGTAACCGAGGCCTGTCCTTCGATGTCAGCCTGGAGGTCAGCCAGGGTAAGATTTCAGGCATCCCGGGC	chr1	130841692	130841864		8
Inflammation_2	PIGR	TXA0447397	PIGR_t2_5	CAACGCTCATCTCTTCAAATGGC	ATTTCATTTGCTTTCCCCAGCAG	240	52	CAACGCTCATCTCTTCAAATGGCTACCTCTCCAAGGAGTATTCAGGCAGAGCCAACCTCATCAACTTCCCAGAGAACAACACATTTGTGATTAACATTGAGCAGCTCACCCAGGACGACACTGGGAGCTACAAGTGTGGCCTGGGTACCAGTAACCGAGGCCTGTCCTTCGATGTCAGCCTGGAGGTCAGCCAGGGTAAGATTTCAGGCATCCCGGGCTGCTGGGGAAAGCAAATGAAAT	chr1	130841647	130841886		7
Inflammation_2	chr1	TXA0447399	PIGR_t2_4	GCTACTACCCAGACACCTCT	GTACCCAGGCCACACTTG	223	53	GCTACTACCCAGACACCTCTGTCAACCGGCACACCCGGAAATACTGGTGCCGACAAGGAGCCAGCGGCATGTGCACAACGCTCATCTCTTCAAATGGCTACCTCTCCAAGGAGTATTCAGGCAGAGCCAACCTCATCAACTTCCCAGAGAACAACACATTTGTGATTAACATTGAGCAGCTCACCCAGGACGACACTGGGAGCTACAAGTGTGGCCTGGGTAC	chr1	130841572	130841794		6
Inflammation_2	chr1	TXA0490774	PIGR_t2_3	CCATCACGTGCTACTACCC	AGCTGCTCAATGTTAATCACAAA	190	52	CCATCACGTGCTACTACCCAGACACCTCTGTCAACCGGCACACCCGGAAATACTGGTGCCGACAAGGAGCCAGCGGCATGTGCACAACGCTCATCTCTTCAAATGGCTACCTCTCCAAGGAGTATTCAGGCAGAGCCAACCTCATCAACTTCCCAGAGAACAACACATTTGTGATTAACATTGAGCAGCT	chr1	130841563	130841752	Assays designed by relax mode and have no off-target hits	1
Inflammation_2	PIGR	TXA0447398	PIGR_t2_2	TATGTGGATCCTATCAGCCCTCT	ATTTGAAGAGATGAGCGTTGTGC	237	51	TATGTGGATCCTATCAGCCCTCTCAACCCCTGTCAGATTTTAGAACTCTTGTCTTTTGTCTCCACAGGGGTCTCCACAAAAAGCCCCATATTTGGTCCCCAGGAGGTGAGTAGTATAGAAGGCGACTCTGTTTCCATCACGTGCTACTACCCAGACACCTCTGTCAACCGGCACACCCGGAAATACTGGTGCCGACAAGGAGCCAGCGGCATGTGCACAACGCTCATCTCTTCAAAT	chr1	130841430	130841666		2
Inflammation_2	chr1	TXA0447401	PIGR_t2_1	TCCTCGGTATGAGCTATGTGGAT	CTCCTTGTCGGCACCAGTATTT	216	51	TCCTCGGTATGAGCTATGTGGATCCTATCAGCCCTCTCAACCCCTGTCAGATTTTAGAACTCTTGTCTTTTGTCTCCACAGGGGTCTCCACAAAAAGCCCCATATTTGGTCCCCAGGAGGTGAGTAGTATAGAAGGCGACTCTGTTTCCATCACGTGCTACTACCCAGACACCTCTGTCAACCGGCACACCCGGAAATACTGGTGCCGACAAGGAG	chr1	130841416	130841631		3
Inflammation_2	chr1	TXA0490785	PIGR_t10_2	CTCAGATGTAGGTCCTTCTCAC	AAGGGTGGGTGGTCAGC	176	56	CTCAGATGTAGGTCCTTCTCACCCGACATCTACTAACGCCTCTTCTGTTGCTCCCTAGTCATCCAAGGAGGAAGCTGACATGGCCTACTCGGCATTCCTGCTTCAGTCCAGCACCATAGCTGCACAGGTCCACGATGGTCCCCAGGAAGCCTAGGCAGTGCTGACCACCCACCCTT	chr1	130850743	130850918		6
Inflammation_2	PIGR	TXA0447440	PIGR_t10_1	AGGTCTCAGAAGTGTTTTGCTCC	AAGTTGATTGTCACAGGCAAGGG	240	54	AGGTCTCAGAAGTGTTTTGCTCCAGCAGAGATGGGAAACTCAGAAGCTCAGATGTAGGTCCTTCTCACCCGACATCTACTAACGCCTCTTCTGTTGCTCCCTAGTCATCCAAGGAGGAAGCTGACATGGCCTACTCGGCATTCCTGCTTCAGTCCAGCACCATAGCTGCACAGGTCCACGATGGTCCCCAGGAAGCCTAGGCAGTGCTGACCACCCACCCTTGCCTGTGACAATCAACTT	chr1	130850697	130850936		5
Inflammation_2	chr1	TXA0447393	PIGR_t1_2	TCTCATACAAGAAGCCAACCTGA	ACTCTGATGTAAGTGTCTCCATGA	190	49	TCTCATACAAGAAGCCAACCTGAGCGGCACAGCCCCCCTGGAAGCCACAAGCAATGAGGCTCTACTTGTTCACGCTCTTGGTAACTGTCTTTTCAGGTAGGTCTGATGGTCCCAACTCTCCAGCTCAAACTGTTGCTCCTAGACTCCTTGTTTCTAGGATCCAACTTCATGGAGACACTTACATCAGAGT	chr1	130834376	130834565		2
Inflammation_2	PIGR	TXA0447392	PIGR_t1_1	CGGAAAGAAAATAGATGTTCCAGAGG	CCTAGAAACAAGGAGTCTAGGAGC	218	47	CGGAAAGAAAATAGATGTTCCAGAGGAACTTCATCTACTTTGGTTATTGTCTTTCAGCATTCTCATACAAGAAGCCAACCTGAGCGGCACAGCCCCCCTGGAAGCCACAAGCAATGAGGCTCTACTTGTTCACGCTCTTGGTAACTGTCTTTTCAGGTAGGTCTGATGGTCCCAACTCTCCAGCTCAAACTGTTGCTCCTAGACTCCTTGTTTCTAGG	chr1	130834316	130834533		1
Inflammation_2	chr2	TXA0459033	NOTCH1_t9_2	AGAGATCATGAGGATACGGGTC	CCTCGGTCTCACCATCTCCC	187	53	AGAGATCATGAGGATACGGGTCCTGTGGTAAGTAGGTGGCCTCACCTTTGGGGCACTGACATTGGAACTCATTGATCTTGTCCATGCAGTGGCCATTGTGCAGACAGGGGCTGCTGGCGCACTCATCCGTGTTGATTTCACAGTATACACCTTCATAACCTGTGGACGGGAGATGGTGAGACCGAGG	chr2	26479402	26479588		5
Inflammation_2	NOTCH1	TXA0459031	NOTCH1_t9_1	AAGTCCTCCCTCAAAGGAGTCTG	CTCTAGAAGGACCTACCGAAGCC	238	53	AAGTCCTCCCTCAAAGGAGTCTGGGAAGAGATCATGAGGATACGGGTCCTGTGGTAAGTAGGTGGCCTCACCTTTGGGGCACTGACATTGGAACTCATTGATCTTGTCCATGCAGTGGCCATTGTGCAGACAGGGGCTGCTGGCGCACTCATCCGTGTTGATTTCACAGTATACACCTTCATAACCTGTGGACGGGAGATGGTGAGACCGAGGACGGCTTCGGTAGGTCCTTCTAGAG	chr2	26479376	26479613		3
Inflammation_2	NOTCH1	TXA0459035	NOTCH1_t8_4	GCATCATTCTGACATGGGTTGGA	GTCCTGGAGAACCACCATTTTGA	239	56	GCATCATTCTGACATGGGTTGGAGATGCACTCATTAACATCAATCTCACAGCGGGGTCCCGTGTAGCCCTGTAGACACTGGCACTCAAAAGAACCCAGTGTGTTGAGGCATTTGCCTGCGTGCTCACAAGGGTTGGCACCTGGTGAAAGAGGCACGGATGAGGGCTCATCTGGCCTTGCAGCCTCCCGACCACCCGCAATGCCCCAGCCCAGGCCATCAAAATGGTGGTTCTCCAGGAC	chr2	26479918	26480156		2
Inflammation_2	chr2	TXA0459037	NOTCH1_t8_3	CAGGCAAGTGGCATCATTCTGAC	CCCTCATCCGTGCCTCTTTC	174	54	CAGGCAAGTGGCATCATTCTGACATGGGTTGGAGATGCACTCATTAACATCAATCTCACAGCGGGGTCCCGTGTAGCCCTGTAGACACTGGCACTCAAAAGAACCCAGTGTGTTGAGGCATTTGCCTGCGTGCTCACAAGGGTTGGCACCTGGTGAAAGAGGCACGGATGAGGG	chr2	26479908	26480081		6
Inflammation_2	chr2	TXA0459036	NOTCH1_t8_2	CTGCTCTTAGCAGCCCCCAT	TCTTTTGAGTGCCAGTGTCTACAG	183	51	CTGCTCTTAGCAGCCCCCATGGTGGGAAATGGCATAAGACATACCTGGCATACATATGCATTGGAACTCCCCAATCTGGTCCAGGCAAGTGGCATCATTCTGACATGGGTTGGAGATGCACTCATTAACATCAATCTCACAGCGGGGTCCCGTGTAGCCCTGTAGACACTGGCACTCAAAAGA	chr2	26479827	26480009		8
Inflammation_2	NOTCH1	TXA0459034	NOTCH1_t8_1	AAGCTATGCAGCCTTGACTCATT	CCTCAACACACTGGGTTCTTTTG	232	52	AAGCTATGCAGCCTTGACTCATTCCCCTGCTGCCTGCTCTTAGCAGCCCCCATGGTGGGAAATGGCATAAGACATACCTGGCATACATATGCATTGGAACTCCCCAATCTGGTCCAGGCAAGTGGCATCATTCTGACATGGGTTGGAGATGCACTCATTAACATCAATCTCACAGCGGGGTCCCGTGTAGCCCTGTAGACACTGGCACTCAAAAGAACCCAGTGTGTTGAGG	chr2	26479794	26480025		7
Inflammation_2	chr2	TXA0459041	NOTCH1_t7_4	GGCTGGCCCTGTGTACC	TAATCCCAGGATAGGGAAAAGCA	178	60	GGCTGGCCCTGTGTACCCCGAGGGGCAGGTGCAGATGGCTTTGCCGTTGACAGGGTTGGTGTCACAGTTGGAGCCCTCGTTGCAGGGGTTGCTGATGCACGCATCGTTGAGGTGGCACAGCAGACCTAGACAAGGCAGCTGCGGTGAGTGGGTGCTGCTTTTCCCTATCCTGGGATTA	chr2	26480255	26480432		4
Inflammation_2	NOTCH1	TXA0459039	NOTCH1_t7_3	CTACCCAGAGCACACTCATCCA	CCTGCTGCAACAACCTGTTAATC	231	60	CTACCCAGAGCACACTCATCCACGTCCTGGCTGCAGGCTGGCCCTGTGTACCCCGAGGGGCAGGTGCAGATGGCTTTGCCGTTGACAGGGTTGGTGTCACAGTTGGAGCCCTCGTTGCAGGGGTTGCTGATGCACGCATCGTTGAGGTGGCACAGCAGACCTAGACAAGGCAGCTGCGGTGAGTGGGTGCTGCTTTTCCCTATCCTGGGATTAACAGGTTGTTGCAGCAGG	chr2	26480220	26480450		1
Inflammation_2	NOTCH1	TXA0459038	NOTCH1_t7_2	TCCAGGACAGATCACATCCCATA	TCTGCTGTGCCACCTCAAC	230	60	TCCAGGACAGATCACATCCCATATATGTGACAGCCAGCCCGTTCCTGCTGCCTGTGCCACTGCATCTGTACCTACCCAGAGCACACTCATCCACGTCCTGGCTGCAGGCTGGCCCTGTGTACCCCGAGGGGCAGGTGCAGATGGCTTTGCCGTTGACAGGGTTGGTGTCACAGTTGGAGCCCTCGTTGCAGGGGTTGCTGATGCACGCATCGTTGAGGTGGCACAGCAGA	chr2	26480149	26480378		5
Inflammation_2	chr2	TXA0459040	NOTCH1_t7_1	AATGGTGGTTCTCCAGGACAGAT	CTCCAACTGTGACACCAACCC	190	58	AATGGTGGTTCTCCAGGACAGATCACATCCCATATATGTGACAGCCAGCCCGTTCCTGCTGCCTGTGCCACTGCATCTGTACCTACCCAGAGCACACTCATCCACGTCCTGGCTGCAGGCTGGCCCTGTGTACCCCGAGGGGCAGGTGCAGATGGCTTTGCCGTTGACAGGGTTGGTGTCACAGTTGGAG	chr2	26480138	26480327		3
Inflammation_2	chr2	TXA0459044	NOTCH1_t6_4	GGCACAGTCATCAATGTTCTCAC	CCCCACAGCCCAGAGCA	220	56	GGCACAGTCATCAATGTTCTCACTGCAGTCCTCGCCAGTCCACCCATTGACACACACACAGTTGTAGCCGCCGTGTGTGTTGTGGCAGGTTCCGCCATTCTGGCAGGCATTGGGCATGAGCTGACATTCGTCCACATCCTCTGTACAGTACTGACCTATGAGGGGTCACAGGACCATCAACCTCAGCTACAAGATGAGCTCCCTGCTCTGGGCTGTGGGG	chr2	26481053	26481272		7
Inflammation_2	NOTCH1	TXA0459043	NOTCH1_t6_3	AAGTGGCACCCTGGAAACAG	TCATCTTGTAGCTGAGGTTGATG	225	55	AAGTGGCACCCTGGAAACAGGCGGCACTGGCACAGTCATCAATGTTCTCACTGCAGTCCTCGCCAGTCCACCCATTGACACACACACAGTTGTAGCCGCCGTGTGTGTTGTGGCAGGTTCCGCCATTCTGGCAGGCATTGGGCATGAGCTGACATTCGTCCACATCCTCTGTACAGTACTGACCTATGAGGGGTCACAGGACCATCAACCTCAGCTACAAGATGA	chr2	26481025	26481249		3
Inflammation_2	chr2	TXA0459045	NOTCH1_t6_2	CAACCAAGTTTCCCTTCTCCCAG	GAACCTGCCACAACACACAC	215	57	CAACCAAGTTTCCCTTCTCCCAGGACATTCCTGCACCGACTTACCTGTGCGCCCATGCGGACATTCGCAGTAGAAGGAAGCCACACGGTCGTGGCAAGTGGCACCCTGGAAACAGGCGGCACTGGCACAGTCATCAATGTTCTCACTGCAGTCCTCGCCAGTCCACCCATTGACACACACACAGTTGTAGCCGCCGTGTGTGTTGTGGCAGGTTC	chr2	26480930	26481144		5
Inflammation_2	NOTCH1	TXA0459042	NOTCH1_t6_1	atatCTCATACATGGCTCCCCAG	GGCTACAACTGTGTGTGTGTCAA	239	56	atatCTCATACATGGCTCCCCAGGTGTTTCCACCAGGGGTGGTGAGCCAACCAAGTTTCCCTTCTCCCAGGACATTCCTGCACCGACTTACCTGTGCGCCCATGCGGACATTCGCAGTAGAAGGAAGCCACACGGTCGTGGCAAGTGGCACCCTGGAAACAGGCGGCACTGGCACAGTCATCAATGTTCTCACTGCAGTCCTCGCCAGTCCACCCATTGACACACACACAGTTGTAGCC	chr2	26480883	26481121	One primer sits in the repeat region	2
Inflammation_2	chr2	TXA0491121	NOTCH1_t5_2	CGGTGTGCAGTTTTGTTAGTG	GGCTCCTCAGCAGACTT	235	55	CGGTGTGCAGTTTTGTTAGTGGAAGGCTGCTGCCTACAAGTCCCATATACATACCCGTCCACTCCGGTGGGCAGCGGCAATTGTAGGTATTCACGCCGTCCACACAGGCACCCCCATTCTTGCAGTTGTTTCCTGGACAGTCATCCACATTTTCTTCACAGTTCTGTCCAGCAAAACCTGTGGGACAGGGGCCAGCCAGCAGGTTAGCCTGACCTCAGAAGTCTGCTGAGGAGCC	chr2	26481517	26481751	Assays designed by relax mode and have no off-target hits	8
Inflammation_2	NOTCH1	TXA0459046	NOTCH1_t5_1	TTCAGACCTTCCTACCACTCCG	CTGGCTGGCCCCTGTC	221	54	TTCAGACCTTCCTACCACTCCGCGGTGTGCAGTTTTGTTAGTGGAAGGCTGCTGCCTACAAGTCCCATATACATACCCGTCCACTCCGGTGGGCAGCGGCAATTGTAGGTATTCACGCCGTCCACACAGGCACCCCCATTCTTGCAGTTGTTTCCTGGACAGTCATCCACATTTTCTTCACAGTTCTGTCCAGCAAAACCTGTGGGACAGGGGCCAGCCAG	chr2	26481495	26481715		6
Inflammation_2	chr2	TXA0459052	NOTCH1_t4_6	GGTGGGGCCATGGAAG	AGATCTATCCCTGGTTGGTA	215	59	GGTGGGGCCATGGAAGCCAGGCGGGCAGCGACAGATGTATGAAGACTCAAAGGGCAGGCACTGGCCACCATTGGCACAGGGGTTGGAGGCACAGGGGTCAGCCTGCTGACATGATTTTCCTGGGAGGCAGAGAAGAGGGTCAGCTGTTGCCAGGGCCTCCCTGTGAACCCAGGGCAGATTTGGACATCATGTAGGTACCAACCAGGGATAGATCT	chr2	26484488	26484702		1
Inflammation_2	NOTCH1	TXA0459049	NOTCH1_t4_5	GATAGGAGCCGATCTCATTGTGG	GCAACAGCTGACCCTCTTCT	235	60	GATAGGAGCCGATCTCATTGTGGCAGGTGCCTCCATGGCGGCACAGCCCAGGGTTCTGGCTGCACTCATTAACATCTTGCCTGCAGGTGGGGCCATGGAAGCCAGGCGGGCAGCGACAGATGTATGAAGACTCAAAGGGCAGGCACTGGCCACCATTGGCACAGGGGTTGGAGGCACAGGGGTCAGCCTGCTGACATGATTTTCCTGGGAGGCAGAGAAGAGGGTCAGCTGTTGC	chr2	26484403	26484637		7
Inflammation_2	chr2	TXA0459050	NOTCH1_t4_4	GGGCTGCAGGGCACATAG	GCCAGTGCCTGCCCTT	214	62	GGGCTGCAGGGCACATAGGGCAGTTCACAGTGGGGACCAGTATGGGTGGCACGGCAGGCACAGCGATAGGAGCCGATCTCATTGTGGCAGGTGCCTCCATGGCGGCACAGCCCAGGGTTCTGGCTGCACTCATTAACATCTTGCCTGCAGGTGGGGCCATGGAAGCCAGGCGGGCAGCGACAGATGTATGAAGACTCAAAGGGCAGGCACTGGC	chr2	26484339	26484552		6
Inflammation_2	chr2	TXA0459048	NOTCH1_t4_3	GCAGGTGCCTCCATTCTG	GCCCTTTGAGTCTTCATACATCT	232	62	GCAGGTGCCTCCATTCTGGCAGGGTGAGGGGCTGCAGGGCACATAGGGCAGTTCACAGTGGGGACCAGTATGGGTGGCACGGCAGGCACAGCGATAGGAGCCGATCTCATTGTGGCAGGTGCCTCCATGGCGGCACAGCCCAGGGTTCTGGCTGCACTCATTAACATCTTGCCTGCAGGTGGGGCCATGGAAGCCAGGCGGGCAGCGACAGATGTATGAAGACTCAAAGGGC	chr2	26484311	26484542		5
Inflammation_2	chr2	TXA0459051	NOTCH1_t4_2	GAACACGCATGGACATGGACAA	CTGCCGTGCCACCCATA	186	61	GAACACGCATGGACATGGACAACCAGGCTAGATGCCAGCATACTGAGATGGAACCTACCTGGCAAGCAGGCACACTCGTGGGTGGTGTCCCCTGTAGGACGGCAGGTGCCTCCATTCTGGCAGGGTGAGGGGCTGCAGGGCACATAGGGCAGTTCACAGTGGGGACCAGTATGGGTGGCACGGCAG	chr2	26484210	26484395		3
Inflammation_2	NOTCH1	TXA0459047	NOTCH1_t4_1	TAACTCTTTCTGCATCCCTCGG	GATCGGCTCCTATCGCTGTG	240	60	TAACTCTTTCTGCATCCCTCGGGCTTGACAGTGGAACACGCATGGACATGGACAACCAGGCTAGATGCCAGCATACTGAGATGGAACCTACCTGGCAAGCAGGCACACTCGTGGGTGGTGTCCCCTGTAGGACGGCAGGTGCCTCCATTCTGGCAGGGTGAGGGGCTGCAGGGCACATAGGGCAGTTCACAGTGGGGACCAGTATGGGTGGCACGGCAGGCACAGCGATAGGAGCCGATC	chr2	26484177	26484416		4
Inflammation_2	chr2	TXA0458943	NOTCH1_t34_9	ACACTGAGGTGTGGCTGT	AGCTGGCCTCCAGCATA	201	59	ACACTGAGGTGTGGCTGTGATGGTGgctgcaggttctgaggctggagctgtaagttctgtggctgCACCTGCTGGGTCTGCACCAGGTGAGGCTGTGTTGCCAGCCGTGTGTTGGGCAGGCCCTGGTAAATAATCGGGGACAAGGTATTGGTGGAGAGGCTGCTGTGTAGTGGCCCCATCATGCTATGCTGGAGGCCAGCT	chr2	26459940	26460140		8
Inflammation_2	chr2	TXA0458931	NOTCH1_t34_8	GGTTGTACATCTGCCTGACT	TACCTTGTCCCCGATTATTTACC	219	60	GGTTGTACATCTGCCTGACTGGGCTCCCCACTCAAGAAGCTCCGGCCCAGGTGCCCATTGGCTGCCGAGCTCACACTGAGGTGTGGCTGTGATGGTGgctgcaggttctgaggctggagctgtaagttctgtggctgCACCTGCTGGGTCTGCACCAGGTGAGGCTGTGTTGCCAGCCGTGTGTTGGGCAGGCCCTGGTAAATAATCGGGGACAAGGTA	chr2	26459868	26460086		6
Inflammation_2	chr2	TXA0458940	NOTCH1_t34_7	CTGGGGCAGAATGGTGTG	CTGGCAACACAGCCTCA	219	63	CTGGGGCAGAATGGTGTGCACAGGCAGACTGCTGGGGCCCAGCGGTTGTACATCTGCCTGACTGGGCTCCCCACTCAAGAAGCTCCGGCCCAGGTGCCCATTGGCTGCCGAGCTCACACTGAGGTGTGGCTGTGATGGTGgctgcaggttctgaggctggagctgtaagttctgtggctgCACCTGCTGGGTCTGCACCAGGTGAGGCTGTGTTGCCAG	chr2	26459825	26460043		3
Inflammation_2	chr2	TXA0458928	NOTCH1_t34_6	GAGGAGGAGTAACTGTGCTG	CCTCAGTGTGAGCTCGG	225	63	GAGGAGGAGTAACTGTGCTGGGAAGGAGGGGTCAGGAACTGGGTAGTGGTCATGGGTGGGACCATGGAGGATGGCAGTGATGTGGGCAGGGCCTGGCTTTCCTGGGGCAGAATGGTGTGCACAGGCAGACTGCTGGGGCCCAGCGGTTGTACATCTGCCTGACTGGGCTCCCCACTCAAGAAGCTCCGGCCCAGGTGCCCATTGGCTGCCGAGCTCACACTGAGG	chr2	26459724	26459948		1
Inflammation_2	chr2	TXA0458949	NOTCH1_t34_5	TTGTCCACAGGGGAGGAG	GAGCTTCTTGAGTGGGGAG	198	61	TTGTCCACAGGGGAGGAGGAGTAACTGTGCTGGGAAGGAGGGGTCAGGAACTGGGTAGTGGTCATGGGTGGGACCATGGAGGATGGCAGTGATGTGGGCAGGGCCTGGCTTTCCTGGGGCAGAATGGTGTGCACAGGCAGACTGCTGGGGCCCAGCGGTTGTACATCTGCCTGACTGGGCTCCCCACTCAAGAAGCTC	chr2	26459712	26459909		4
Inflammation_2	chr2	TXA0458927	NOTCH1_t34_4	GGACCAATCAGAGATGTTGGAAT	CCATTCTGCCCCAGGAAA	239	62	GGACCAATCAGAGATGTTGGAATGCGGGGAGGAGCTGGACCACTGGTCAGGGGACTCAGGGGATGGGGTGAGGAAGGGGTGCTCTGGCACCTGCAGCTGGTGGCTGGGGGTGTTGTCCACAGGGGAGGAGGAGTAACTGTGCTGGGAAGGAGGGGTCAGGAACTGGGTAGTGGTCATGGGTGGGACCATGGAGGATGGCAGTGATGTGGGCAGGGCCTGGCTTTCCTGGGGCAGAATGG	chr2	26459600	26459838		7
Inflammation_2	chr2	TXA0458938	NOTCH1_t34_3	GATGCCCTCGGACCAATC	ACCCATGACCACTACCCA	190	62	GATGCCCTCGGACCAATCAGAGATGTTGGAATGCGGGGAGGAGCTGGACCACTGGTCAGGGGACTCAGGGGATGGGGTGAGGAAGGGGTGCTCTGGCACCTGCAGCTGGTGGCTGGGGGTGTTGTCCACAGGGGAGGAGGAGTAACTGTGCTGGGAAGGAGGGGTCAGGAACTGGGTAGTGGTCATGGGT	chr2	26459591	26459780		5
Inflammation_2	chr2	TXA0458942	NOTCH1_t34_23	ATCCAAAAGCCGCACGATA	TCATGTACCTCCTGTCCGT	190	58	ATCCAAAAGCCGCACGATATCGTGGTGCATACGCTCCTGTGCGATGTCCCGCGGCAATCGGTCCATGTGATCCGTGATGTCCCGGTTGGCAAAGTGGTCCAGCAACACTTTGGCAGTCTCATAGCTGCCCTCACGGGCGGCCAGGAACAGGGGAGTCTCCTCCTGTAGGACACGGACAGGAGGTACATGA	chr2	26460815	26461004		4
Inflammation_2	chr2	TXA0458930	NOTCH1_t34_22	ACCAGGTTGTACTCATCCAAAAG	ATGACTCAGCAAATTCTACACCT	237	57	ACCAGGTTGTACTCATCCAAAAGCCGCACGATATCGTGGTGCATACGCTCCTGTGCGATGTCCCGCGGCAATCGGTCCATGTGATCCGTGATGTCCCGGTTGGCAAAGTGGTCCAGCAACACTTTGGCAGTCTCATAGCTGCCCTCACGGGCGGCCAGGAACAGGGGAGTCTCCTCCTGTAGGACACGGACAGGAGGTACATGAGGGAGCGGGCAGGTGTAGAATTTGCTGAGTCAT	chr2	26460801	26461037		6
Inflammation_2	chr2	TXA0458948	NOTCH1_t34_21	CTGTGTGGCAGACTTGAGATTG	TCACATGGACCGATTGCC	190	60	CTGTGTGGCAGACTTGAGATTGCCCAGGTAGCCATTGGGCGAGCAGAGTGTGGGAGACAGAGTGGGTGTGCCACCCAGGGCAGTGCCATGCAGCTGTGGGCTGCGCACCAGGTTGTACTCATCCAAAAGCCGCACGATATCGTGGTGCATACGCTCCTGTGCGATGTCCCGCGGCAATCGGTCCATGTGA	chr2	26460695	26460884		8
Inflammation_2	NOTCH1	TXA0458924	NOTCH1_t34_20	CCTTAGCTTCCTTGCTACCACAA	CGGGACATCGCACAGGAG	232	60	CCTTAGCTTCCTTGCTACCACAAGCCAGCCCTTTGGTGCTGGGCTTGCGGGCCTTCTTGCCCTGTGTGGCAGACTTGAGATTGCCCAGGTAGCCATTGGGCGAGCAGAGTGTGGGAGACAGAGTGGGTGTGCCACCCAGGGCAGTGCCATGCAGCTGTGGGCTGCGCACCAGGTTGTACTCATCCAAAAGCCGCACGATATCGTGGTGCATACGCTCCTGTGCGATGTCCCG	chr2	26460634	26460865		2
Inflammation_2	chr2	TXA0458941	NOTCH1_t34_2	CCCAACAGGGCTTGGGAAC	CCATCCCCTGAGTCCCCTG	186	59	CCCAACAGGGCTTGGGAACGGAAGCTGGGGTCCTGCATCCCACATCTCTGTTTATTTAAATGCCTCTGGAATGTGGGTGATCTGGGACGGCATGGTGGTGGGCGGGCTGGAGATGCCCTCGGACCAATCAGAGATGTTGGAATGCGGGGAGGAGCTGGACCACTGGTCAGGGGACTCAGGGGATGG	chr2	26459480	26459665		3
Inflammation_2	chr2	TXA0458944	NOTCH1_t34_19	GTCCACAGGCGACAGCAT	GTGGCACACCCACTCTG	215	60	GTCCACAGGCGACAGCATGCTCGAGCTGTCCAACAGGCAGCCCTTGCCATCCTGGGACTTCTTCCTCCGTGCCTTGAGGTCCTTAGCTTCCTTGCTACCACAAGCCAGCCCTTTGGTGCTGGGCTTGCGGGCCTTCTTGCCCTGTGTGGCAGACTTGAGATTGCCCAGGTAGCCATTGGGCGAGCAGAGTGTGGGAGACAGAGTGGGTGTGCCAC	chr2	26460554	26460768		1
Inflammation_2	NOTCH1	TXA0458932	NOTCH1_t34_18	GCCACATCTGACAAGTAGCCAT	TCTGTCTCCCACACTCTGCTC	240	60	GCCACATCTGACAAGTAGCCATGGGGTGACTCGAGGGAGTCCACAGGCGACAGCATGCTCGAGCTGTCCAACAGGCAGCCCTTGCCATCCTGGGACTTCTTCCTCCGTGCCTTGAGGTCCTTAGCTTCCTTGCTACCACAAGCCAGCCCTTTGGTGCTGGGCTTGCGGGCCTTCTTGCCCTGTGTGGCAGACTTGAGATTGCCCAGGTAGCCATTGGGCGAGCAGAGTGTGGGAGACAGA	chr2	26460516	26460755		7
Inflammation_2	chr2	TXA0491087	NOTCH1_t34_17	GGCTGAGAGGCATGGATGG	CTAAGGACCTCAAGGCACGGA	180	62	GGCTGAGAGGCATGGATGGAGACTGCTGGAATGGGGAGGGGAGGAGGGGTGGCGAGGCCACATCTGACAAGTAGCCATGGGGTGACTCGAGGGAGTCCACAGGCGACAGCATGCTCGAGCTGTCCAACAGGCAGCCCTTGCCATCCTGGGACTTCTTCCTCCGTGCCTTGAGGTCCTTAG	chr2	26460460	26460639		5
Inflammation_2	chr2	TXA0458923	NOTCH1_t34_16	TACAGGCAGGTGGGAGAG	GGACTCCCTCGAGTCACC	235	63	TACAGGCAGGTGGGAGAGGCGTGGCGGGGGTGGCTCAAAGGCCAACCGGCTACCTCCAGCCAGTGCTGCCATCTCAGGCTTGGCTGCCACATTCAAGTGGCTGATGCCCAGGTGAGTGTCAGGCATACCAGGCAGGTGGCTGAGAGGCATGGATGGAGACTGCTGGAATGGGGAGGGGAGGAGGGGTGGCGAGGCCACATCTGACAAGTAGCCATGGGGTGACTCGAGGGAGTCC	chr2	26460323	26460557		8
Inflammation_2	chr2	TXA0491086	NOTCH1_t34_15	ACTGTGCTGGCACTGGA	CTCCTCCCCTCCCCATT	203	63	ACTGTGCTGGCACTGGAGGCTACAGGCAGGTGGGAGAGGCGTGGCGGGGGTGGCTCAAAGGCCAACCGGCTACCTCCAGCCAGTGCTGCCATCTCAGGCTTGGCTGCCACATTCAAGTGGCTGATGCCCAGGTGAGTGTCAGGCATACCAGGCAGGTGGCTGAGAGGCATGGATGGAGACTGCTGGAATGGGGAGGGGAGGAG	chr2	26460303	26460505		4
Inflammation_2	chr2	TXA0458926	NOTCH1_t34_14	CACTCACACTGGCCATTCA	GCCTGGTATGCCTGACAC	228	61	CACTCACACTGGCCATTCAAGCTTGCCGGTGCACCCACGGTGAAATTCATAGCCCCCGTGCCATTGGTACTCAGCACTGTGCTGGCACTGGAGGCTACAGGCAGGTGGGAGAGGCGTGGCGGGGGTGGCTCAAAGGCCAACCGGCTACCTCCAGCCAGTGCTGCCATCTCAGGCTTGGCTGCCACATTCAAGTGGCTGATGCCCAGGTGAGTGTCAGGCATACCAGGC	chr2	26460228	26460455		3
Inflammation_2	chr2	TXA0458945	NOTCH1_t34_13	ACCATGCCATTCTGGAGC	CTGGAGGTAGCCGGTTG	181	62	ACCATGCCATTCTGGAGCCGGGGAAGCCACTCACACTGGCCATTCAAGCTTGCCGGTGCACCCACGGTGAAATTCATAGCCCCCGTGCCATTGGTACTCAGCACTGTGCTGGCACTGGAGGCTACAGGCAGGTGGGAGAGGCGTGGCGGGGGTGGCTCAAAGGCCAACCGGCTACCTCCAG	chr2	26460201	26460381		6
Inflammation_2	chr2	TXA0458925	NOTCH1_t34_12	GACAAGGTATTGGTGGAGAGG	GCACAGTGCTGAGTACCAA	232	61	GACAAGGTATTGGTGGAGAGGCTGCTGTGTAGTGGCCCCATCATGCTATGCTGGAGGCCAGCTGCCTGTGTGCTCAGTGTGCCCGGCGTCACACCCGGCCGTAGTGGGTTGTACTGGCTGGGCACCATGCCATTCTGGAGCCGGGGAAGCCACTCACACTGGCCATTCAAGCTTGCCGGTGCACCCACGGTGAAATTCATAGCCCCCGTGCCATTGGTACTCAGCACTGTGC	chr2	26460078	26460309		5
Inflammation_2	chr2	TXA0458947	NOTCH1_t34_11	GGTAAATAATCGGGGACAAGGTA	GCTATGAATTTCACCGTGGG	217	59	GGTAAATAATCGGGGACAAGGTATTGGTGGAGAGGCTGCTGTGTAGTGGCCCCATCATGCTATGCTGGAGGCCAGCTGCCTGTGTGCTCAGTGTGCCCGGCGTCACACCCGGCCGTAGTGGGTTGTACTGGCTGGGCACCATGCCATTCTGGAGCCGGGGAAGCCACTCACACTGGCCATTCAAGCTTGCCGGTGCACCCACGGTGAAATTCATAGC	chr2	26460064	26460280		7
Inflammation_2	chr2	TXA0458933	NOTCH1_t34_10	gCACCTGCTGGGTCTG	GGCTCCAGAATGGCATGG	216	62	gCACCTGCTGGGTCTGCACCAGGTGAGGCTGTGTTGCCAGCCGTGTGTTGGGCAGGCCCTGGTAAATAATCGGGGACAAGGTATTGGTGGAGAGGCTGCTGTGTAGTGGCCCCATCATGCTATGCTGGAGGCCAGCTGCCTGTGTGCTCAGTGTGCCCGGCGTCACACCCGGCCGTAGTGGGTTGTACTGGCTGGGCACCATGCCATTCTGGAGCC	chr2	26460004	26460219	One primer sits in the repeat region	2
Inflammation_2	NOTCH1	TXA0458929	NOTCH1_t34_1	CATCCTGAAGCACTGGAAAGGAC	CAGAGCACCCCTTCCTCAC	230	59	CATCCTGAAGCACTGGAAAGGACTCCCAACAGGGCTTGGGAACGGAAGCTGGGGTCCTGCATCCCACATCTCTGTTTATTTAAATGCCTCTGGAATGTGGGTGATCTGGGACGGCATGGTGGTGGGCGGGCTGGAGATGCCCTCGGACCAATCAGAGATGTTGGAATGCGGGGAGGAGCTGGACCACTGGTCAGGGGACTCAGGGGATGGGGTGAGGAAGGGGTGCTCTG	chr2	26459456	26459685		6
Inflammation_2	chr2	TXA0458934	NOTCH1_t33_2	TCTAAGTGGTCAACGTATGGGTG	CTCAGCCCCAACCCACTCTC	213	57	TCTAAGTGGTCAACGTATGGGTGCCCCGGAGTCCCCATCATGCGCCTGCGGTTAAGCAGCCCGTCTGCTTACCTTGTTGTTCTGCATGTCCTTGTTGGCTCCGTTCTTCAGGAGCACAACAGCAGCATCCACATTGTTCACCGCGGCCGCCCAATGCAAAGCCGACTTGCCTGGAAAGGAAGCAAAGAGAGGAGAGAGTGGGTTGGGGCTGAG	chr2	26462076	26462288		7
Inflammation_2	NOTCH1	TXA0458922	NOTCH1_t33_1	GGGTTATTTTAGGCTGCTGTTGT	ACTCTCTCCTCTCTTTGCTTCCT	240	54	GGGTTATTTTAGGCTGCTGTTGTCCCAGACACTCTTAAACCTCTAAGTGGTCAACGTATGGGTGCCCCGGAGTCCCCATCATGCGCCTGCGGTTAAGCAGCCCGTCTGCTTACCTTGTTGTTCTGCATGTCCTTGTTGGCTCCGTTCTTCAGGAGCACAACAGCAGCATCCACATTGTTCACCGCGGCCGCCCAATGCAAAGCCGACTTGCCTGGAAAGGAAGCAAAGAGAGGAGAGAGT	chr2	26462035	26462274		5
Inflammation_2	chr2	TXA0458937	NOTCH1_t32_3	TCAGCATGTGAGTTGATGAGGTC	CCAGGCATTGGTTTCTGGAGAT	196	58	TCAGCATGTGAGTTGATGAGGTCCTCCAGCATGCCCTCCACGGCCAGGCGCGCAGCCAGGATCAGTGGAGTTGTGCCATCATGCATTCGGGCATCCAGATCTGTGGCCCTGTTCCGGAGCAGGATCTGGAAGGCAGGGATGGGTTCAGGCAGGGTGATCTAAATGCAAGCCTGTATCTCCAGAAACCAATGCCTGG	chr2	26462365	26462560		1
Inflammation_2	NOTCH1	TXA0458935	NOTCH1_t32_2	CACTGGCTGATGTCCTCGGTAG	GCATTTAGATCACCCTGCCTGAA	233	60	CACTGGCTGATGTCCTCGGTAGCTGGGCTGTAGCTCGGGCCTACCTAGGTCATCCACGGCATTGACGTCAGCATGTGAGTTGATGAGGTCCTCCAGCATGCCCTCCACGGCCAGGCGCGCAGCCAGGATCAGTGGAGTTGTGCCATCATGCATTCGGGCATCCAGATCTGTGGCCCTGTTCCGGAGCAGGATCTGGAAGGCAGGGATGGGTTCAGGCAGGGTGATCTAAATGC	chr2	26462298	26462530		2
Inflammation_2	chr2	TXA0458936	NOTCH1_t32_1	GGAAGCAAAGAGAGGAGAGAGT	TGGCACAACTCCACTGATCC	190	61	GGAAGCAAAGAGAGGAGAGAGTGGGTTGGGGCTGAGCAGACCAGGCACTGGCTGATGTCCTCGGTAGCTGGGCTGTAGCTCGGGCCTACCTAGGTCATCCACGGCATTGACGTCAGCATGTGAGTTGATGAGGTCCTCCAGCATGCCCTCCACGGCCAGGCGCGCAGCCAGGATCAGTGGAGTTGTGCCA	chr2	26462253	26462442		8
Inflammation_2	chr2	TXA0458953	NOTCH1_t31_5	CGGTCTGTCTGGTTGTGCAAG	TATGGTTGAATGTTGACCCTCCC	215	54	CGGTCTGTCTGGTTGTGCAAGCTGGCGCCCTGGTAGATGAAGTCAGAGATGACAGCAGGTGCATCTTCTTCTTCTTCACTGTTGCCTGTCTCAAGGCCCCCTCCACTGCAGGAGGCAATCATGAGGGGTGTGAAGCCATCTGCAGAGAGGACAGAAACAAGGGTAGGTGTGGGAAGGATGGTGTCAGCCTCAGGGAGGGTCAACATTCAACCATA	chr2	26463867	26464081		3
Inflammation_2	NOTCH1	TXA0458951	NOTCH1_t31_4	GCTTTGCAGCATCTGAACGAG	CCATCCTTCCCACACCTACCC	240	57	GCTTTGCAGCATCTGAACGAGAGTATCGGGCAGCCAAGTGCAAGGCGGTCTCCCCGGTGCGGTCTGTCTGGTTGTGCAAGCTGGCGCCCTGGTAGATGAAGTCAGAGATGACAGCAGGTGCATCTTCTTCTTCTTCACTGTTGCCTGTCTCAAGGCCCCCTCCACTGCAGGAGGCAATCATGAGGGGTGTGAAGCCATCTGCAGAGAGGACAGAAACAAGGGTAGGTGTGGGAAGGATGG	chr2	26463808	26464047		8
Inflammation_2	chr2	TXA0458954	NOTCH1_t31_3	TGTCCTGGATGTTGGCATCTG	AGACAGGCAACAGTGAAGAAGAA	189	57	TGTCCTGGATGTTGGCATCTGCACTGGCCTCCAGCAAGCGCTTTGCAGCATCTGAACGAGAGTATCGGGCAGCCAAGTGCAAGGCGGTCTCCCCGGTGCGGTCTGTCTGGTTGTGCAAGCTGGCGCCCTGGTAGATGAAGTCAGAGATGACAGCAGGTGCATCTTCTTCTTCTTCACTGTTGCCTGTCT	chr2	26463769	26463957		5
Inflammation_2	NOTCH1	TXA0458950	NOTCH1_t31_2	CTGATGAGGTCACTGGCTCC	CAGCTTGCACAACCAGACAGAC	221	58	CTGATGAGGTCACTGGCTCCAAGGATGCAGTGCTGCGTACCTGGAAGACACCCTGAGCATCTGCAGAAACTGCTGCATGTAACGGAGTACGGCCCATGTTGTCCTGGATGTTGGCATCTGCACTGGCCTCCAGCAAGCGCTTTGCAGCATCTGAACGAGAGTATCGGGCAGCCAAGTGCAAGGCGGTCTCCCCGGTGCGGTCTGTCTGGTTGTGCAAGCTG	chr2	26463670	26463890		4
Inflammation_2	chr2	TXA0458952	NOTCH1_t31_1	CAGGGTCCATGCCAGTCAG	GGAGACCGCCTTGCACTT	212	58	CAGGGTCCATGCCAGTCAGACCTGATGAGGTCACTGGCTCCAAGGATGCAGTGCTGCGTACCTGGAAGACACCCTGAGCATCTGCAGAAACTGCTGCATGTAACGGAGTACGGCCCATGTTGTCCTGGATGTTGGCATCTGCACTGGCCTCCAGCAAGCGCTTTGCAGCATCTGAACGAGAGTATCGGGCAGCCAAGTGCAAGGCGGTCTCC	chr2	26463649	26463860		6
Inflammation_2	chr2	TXA0458956	NOTCH1_t30_4	CTGAGGCGGTGTTGGG	GAAGACCTGGAGACCAAGAAG	238	62	CTGAGGCGGTGTTGGGGCCATGGCAGACATGCGCAGGTCAGCAGCGTCCAGGTGCTGCTGGGTCCACTGCCTGTGGTCAGTCTGATCACTCAGGTCAGGGAGAACTACTGGCTCCTCAAACTGAGTGTGGACAGAGTAAGCAGAGCCTCATCACTTGGGGCCAAGGCAGGAGGTGCCACCCAGGGGGGGCTTGGGAGCCTGCGGGACTCACCCGGAACTTCTTGGTCTCCAGGTCTTC	chr2	26464852	26465089		1
Inflammation_2	chr2	TXA0458957	NOTCH1_t30_3	CTCGAACATTGACATCCATGCAG	GAGGCTCTGCTTACTCTGTCCAC	189	59	CTCGAACATTGACATCCATGCAGTCAGCATCCACCTCCCCCTGAGGCGGTGTTGGGGCCATGGCAGACATGCGCAGGTCAGCAGCGTCCAGGTGCTGCTGGGTCCACTGCCTGTGGTCAGTCTGATCACTCAGGTCAGGGAGAACTACTGGCTCCTCAAACTGAGTGTGGACAGAGTAAGCAGAGCCTC	chr2	26464812	26465000		5
Inflammation_2	NOTCH1	TXA0458955	NOTCH1_t30_2	AGTCTATGCTAGGGAATGTGTGC	CACTCAGTTTGAGGAGCCAGTAG	217	58	AGTCTATGCTAGGGAATGTGTGCATGTGTCTCCAGTGGCCTTACCTGGTCCTCGAACATTGACATCCATGCAGTCAGCATCCACCTCCCCCTGAGGCGGTGTTGGGGCCATGGCAGACATGCGCAGGTCAGCAGCGTCCAGGTGCTGCTGGGTCCACTGCCTGTGGTCAGTCTGATCACTCAGGTCAGGGAGAACTACTGGCTCCTCAAACTGAGTG	chr2	26464762	26464978		6
Inflammation_2	chr2	TXA0458958	NOTCH1_t30_1	CCTACTGGCCTCTTAAGTCTATGC	CACAGGCAGTGGACCCAG	180	59	CCTACTGGCCTCTTAAGTCTATGCTAGGGAATGTGTGCATGTGTCTCCAGTGGCCTTACCTGGTCCTCGAACATTGACATCCATGCAGTCAGCATCCACCTCCCCCTGAGGCGGTGTTGGGGCCATGGCAGACATGCGCAGGTCAGCAGCGTCCAGGTGCTGCTGGGTCCACTGCCTGTG	chr2	26464747	26464926		2
Inflammation_2	chr2	TXA0459060	NOTCH1_t3_5	GGGACAGCTGCAGGCATAATC	GAGCTGACTGCCCTACATGTCT	160	57	GGGACAGCTGCAGGCATAATCCACAGTGCCACCATGGTCCACAACGTGGCACGTTCCAGCATTCTTACACGGTGTGCTGAGGCAAGGATTGGAGTCCTGGCATCGTTGGCCCACAAAGGCTCCGCTGCAGCTGTTGACAGACATGTAGGGCAGTCAGCTC	chr2	26485320	26485479		5
Inflammation_2	NOTCH1	TXA0459056	NOTCH1_t3_4	CGTTGTCCAGAGGTGTCAGG	CTGTGGCCATGAGAGATGAGG	229	59	CGTTGTCCAGAGGTGTCAGGCAGAGGGGCCCAGAGAAACCCAGGGGACAGCTGCAGGCATAATCCACAGTGCCACCATGGTCCACAACGTGGCACGTTCCAGCATTCTTACACGGTGTGCTGAGGCAAGGATTGGAGTCCTGGCATCGTTGGCCCACAAAGGCTCCGCTGCAGCTGTTGACAGACATGTAGGGCAGTCAGCTCCCCGCCCTCATCTCTCATGGCCACAG	chr2	26485277	26485505		3
Inflammation_2	chr2	TXA0459058	NOTCH1_t3_3	TGAGAGTGAGCAGGTCACAGG	CCTCAGCACACCGTGTAAGAATG	179	61	TGAGAGTGAGCAGGTCACAGGTGCCCCCATTGCGGCAGGGGTTGGCCAGGCAGGCGTTGTCCAGAGGTGTCAGGCAGAGGGGCCCAGAGAAACCCAGGGGACAGCTGCAGGCATAATCCACAGTGCCACCATGGTCCACAACGTGGCACGTTCCAGCATTCTTACACGGTGTGCTGAGG	chr2	26485223	26485401		6
Inflammation_2	NOTCH1	TXA0459055	NOTCH1_t3_2	CCTAAGGGTCCCAACCGTGAA	CCATGGTGGCACTGTGGATTA	216	61	CCTAAGGGTCCCAACCGTGAAGTTCACAACCTCCTATAGCCCTTACCTGACCACCCTGGTGGGCAGCGGCACTTGTACTCTGTGAGAGTGAGCAGGTCACAGGTGCCCCCATTGCGGCAGGGGTTGGCCAGGCAGGCGTTGTCCAGAGGTGTCAGGCAGAGGGGCCCAGAGAAACCCAGGGGACAGCTGCAGGCATAATCCACAGTGCCACCATGG	chr2	26485141	26485356		2
Inflammation_2	chr2	TXA0459059	NOTCH1_t3_1	ACCAGAGTATGTCAAGTCAACAA	GTTTCTCTGGGCCCCTCTG	220	59	ACCAGAGTATGTCAAGTCAACAAAGATAGGGTCCTTGGGCCCAGGCCTAAGGGTCCCAACCGTGAAGTTCACAACCTCCTATAGCCCTTACCTGACCACCCTGGTGGGCAGCGGCACTTGTACTCTGTGAGAGTGAGCAGGTCACAGGTGCCCCCATTGCGGCAGGGGTTGGCCAGGCAGGCGTTGTCCAGAGGTGTCAGGCAGAGGGGCCCAGAGAAAC	chr2	26485096	26485315		8
Inflammation_2	chr2	TXA0458960	NOTCH1_t29_2	CAGAGTAAGCAGAGCCTCATCAC	CATCTCCTGGAGTACCTGCTCA	212	60	CAGAGTAAGCAGAGCCTCATCACTTGGGGCCAAGGCAGGAGGTGCCACCCAGGGGGGGCTTGGGAGCCTGCGGGACTCACCCGGAACTTCTTGGTCTCCAGGTCTTCGTCTCCCCACTCGTTCTGATTGTCGTCCATCAGAGCACCATCTGAGGCATTCTTCAGGGGCCTGGGTATGGGGGTAGGGAGACTGAGCAGGTACTCCAGGAGATG	chr2	26464983	26465194		4
Inflammation_2	NOTCH1	TXA0458959	NOTCH1_t29_1	GGAGAACTACTGGCTCCTCAAAC	CTCAGTCTCCCTACCCCCATA	227	59	GGAGAACTACTGGCTCCTCAAACTGAGTGTGGACAGAGTAAGCAGAGCCTCATCACTTGGGGCCAAGGCAGGAGGTGCCACCCAGGGGGGGCTTGGGAGCCTGCGGGACTCACCCGGAACTTCTTGGTCTCCAGGTCTTCGTCTCCCCACTCGTTCTGATTGTCGTCCATCAGAGCACCATCTGAGGCATTCTTCAGGGGCCTGGGTATGGGGGTAGGGAGACTGAG	chr2	26464950	26465176		3
Inflammation_2	chr2	TXA0458966	NOTCH1_t28_4	ACACTTTGAAACCCTCAGGGAAC	GCCAGCCCACAGCATCA	219	68	ACACTTTGAAACCCTCAGGGAACCAGAGCTGGCCATGCTGCCGCCGGCGCTTGCGGGACAGCAGCACCCCACAGCCCACAAAGAACAGGAGCACGAAGGCGGCCGCTGCCACGTACATGAGGTGCAGCTGCGAGGGCAGCGGAGGCTCCACCGGCTCACCTGCGGGCAGGGGCGGCAGGCAAGCACCCCTCGTCAGGCGTGGTGATGCTGTGGGCTGGC	chr2	26465408	26465626		5
Inflammation_2	NOTCH1	TXA0458961	NOTCH1_t28_3	CTCTCTCCGCTTCTTCTTGCTG	CCTGACGAGGGGTGCTTG	226	67	CTCTCTCCGCTTCTTCTTGCTGGCCTCTGACACTTTGAAACCCTCAGGGAACCAGAGCTGGCCATGCTGCCGCCGGCGCTTGCGGGACAGCAGCACCCCACAGCCCACAAAGAACAGGAGCACGAAGGCGGCCGCTGCCACGTACATGAGGTGCAGCTGCGAGGGCAGCGGAGGCTCCACCGGCTCACCTGCGGGCAGGGGCGGCAGGCAAGCACCCCTCGTCAGG	chr2	26465379	26465604		8
Inflammation_2	chr2	TXA0458967	NOTCH1_t28_2	CTCACTCACCCACACACAG	GCTGCTGTCCCGCAAG	162	63	CTCACTCACCCACACACAGTGGGAGCAGTGTCCACTCACTTGAGGCCGACTGAGTCCTCGCCGAGGGGCTCTCTCCGCTTCTTCTTGCTGGCCTCTGACACTTTGAAACCCTCAGGGAACCAGAGCTGGCCATGCTGCCGCCGGCGCTTGCGGGACAGCAGC	chr2	26465311	26465472		2
Inflammation_2	NOTCH1	TXA0458962	NOTCH1_t28_1	CCATGGGCCTTCTGGAGCTAA	CTCCTGTTCTTTGTGGGCTGTG	230	63	CCATGGGCCTTCTGGAGCTAAGCACCCCCACCAACCCTGCCACTCACTCACCCACACACAGTGGGAGCAGTGTCCACTCACTTGAGGCCGACTGAGTCCTCGCCGAGGGGCTCTCTCCGCTTCTTCTTGCTGGCCTCTGACACTTTGAAACCCTCAGGGAACCAGAGCTGGCCATGCTGCCGCCGGCGCTTGCGGGACAGCAGCACCCCACAGCCCACAAAGAACAGGAG	chr2	26465269	26465498		7
Inflammation_2	chr2	TXA0458964	NOTCH1_t27_3	GCTGCCAAGTGACGCAAG	GTCAGAGCTGGTGTGTAGGC	182	55	GCTGCCAAGTGACGCAAGAGCACCTAGGAAGGCAGCCACATCGGTGGCACTCTGGAAGCACTGCGAGGATGACTGCACACATTGCCGGTTGTCGATCTCCAGGTAGACAATGGAGCTGAGAACACACATGGCACAGTGAGATTAGATACACCCCAGTACACTGCCTACACACCAGCTCTGAC	chr2	26466501	26466682		4
Inflammation_2	NOTCH1	TXA0458963	NOTCH1_t27_2	GCTCTTAACCACCGAGCCAT	GTACTGGGGTGTATCTAATCTCAC	236	53	gctcttaaccaccgagccatccctccagccccTGATTACTCACTCTTCACGGCCTCAATCTTGTAAGGAATATTGAGGCTGCCAAGTGACGCAAGAGCACCTAGGAAGGCAGCCACATCGGTGGCACTCTGGAAGCACTGCGAGGATGACTGCACACATTGCCGGTTGTCGATCTCCAGGTAGACAATGGAGCTGAGAACACACATGGCACAGTGAGATTAGATACACCCCAGTAC	chr2	26466424	26466659	One primer sits in the repeat region	2
Inflammation_2	chr2	TXA0458965	NOTCH1_t27_1	ATTTGAACCCTTGTCCTCTGCAA	GTCATCCTCGCAGTGCTTCC	184	54	atttgaacccttgtcctctgcaagagcagccagtgctcttaaccaccgagccatccctccagccccTGATTACTCACTCTTCACGGCCTCAATCTTGTAAGGAATATTGAGGCTGCCAAGTGACGCAAGAGCACCTAGGAAGGCAGCCACATCGGTGGCACTCTGGAAGCACTGCGAGGATGAC	chr2	26466390	26466573	One primer sits in the repeat region	6
Inflammation_2	chr2	TXA0458972	NOTCH1_t26_7	TGGAAGCAGCACCACCAG	GTATGGGTTTGAGGTCCACAGG	215	60	TGGAAGCAGCACCACCAGCACCAGGGTGCCGGCTGCCAGCCGCTCGGGTACATGCTCAGCACAGTCTAGGCCATCCCACTCACATTCGGCACTGTTACAGCCCTGGTCGCAGTGGCCATCACTGAAGTGGTCCTTGCAGTACTGGTCATACAGGGGGCTGAGGAGGTATAGGATGCACTCAGTCCCATCCCAGCCTGTGGACCTCAAACCCATAC	chr2	26467874	26468088		7
Inflammation_2	NOTCH1	TXA0458968	NOTCH1_t26_6	GGAAGGAGTTGTTCCGTAGCTG	ATGGGACTGAGTGCATCCTATAC	216	60	GGAAGGAGTTGTTCCGTAGCTGGTCGGGTGGAAGCAGCACCACCAGCACCAGGGTGCCGGCTGCCAGCCGCTCGGGTACATGCTCAGCACAGTCTAGGCCATCCCACTCACATTCGGCACTGTTACAGCCCTGGTCGCAGTGGCCATCACTGAAGTGGTCCTTGCAGTACTGGTCATACAGGGGGCTGAGGAGGTATAGGATGCACTCAGTCCCAT	chr2	26467846	26468061		6
Inflammation_2	chr2	TXA0458971	NOTCH1_t26_5	CATCACGCTTGAAGACCAC	CTGTAACAGTGCCGAATGTGAG	185	61	CATCACGCTTGAAGACCACGTTGGTGTGCAGCACGTGGCTGAGCTCCCGCAGAAAGTGGAAGGAGTTGTTCCGTAGCTGGTCGGGTGGAAGCAGCACCACCAGCACCAGGGTGCCGGCTGCCAGCCGCTCGGGTACATGCTCAGCACAGTCTAGGCCATCCCACTCACATTCGGCACTGTTACAG	chr2	26467789	26467973		2
Inflammation_2	NOTCH1	TXA0458969	NOTCH1_t26_4	AACCCACTGTAGAGCGCTTGATT	CTAGACTGTGCTGAGCATGTACC	238	60	AACCCACTGTAGAGCGCTTGATTGGGTGCTTGCGCAGCTCTTCCTCGTGGCCATAGTACGGGAAGATCATCTGCTGGCCTTGCGCATCACGCTTGAAGACCACGTTGGTGTGCAGCACGTGGCTGAGCTCCCGCAGAAAGTGGAAGGAGTTGTTCCGTAGCTGGTCGGGTGGAAGCAGCACCACCAGCACCAGGGTGCCGGCTGCCAGCCGCTCGGGTACATGCTCAGCACAGTCTAG	chr2	26467705	26467942		1
Inflammation_2	chr2	TXA0458974	NOTCH1_t26_3	AGGAAGCAGTGAAGAGGTGG	TGCTGGTGGTGCTGCTTC	212	58	AGGAAGCAGTGAAGAGGTGGCCCAACCCACTGTAGAGCGCTTGATTGGGTGCTTGCGCAGCTCTTCCTCGTGGCCATAGTACGGGAAGATCATCTGCTGGCCTTGCGCATCACGCTTGAAGACCACGTTGGTGTGCAGCACGTGGCTGAGCTCCCGCAGAAAGTGGAAGGAGTTGTTCCGTAGCTGGTCGGGTGGAAGCAGCACCACCAGCA	chr2	26467682	26467893		4
Inflammation_2	chr2	TXA0458973	NOTCH1_t26_2	CAGGGACACACTGGGAAACAG	GTACTATGGCCACGAGGAAGAG	185	62	CAGGGACACACTGGGAAACAGCCCACAACAGCAGGAGCTGGAGCACTCACCCACGGATGTCCATGGGGTCCAGCTCCCTGCGCTGGCGCCCACCACTGGTACCAGGAAGCAGTGAAGAGGTGGCCCAACCCACTGTAGAGCGCTTGATTGGGTGCTTGCGCAGCTCTTCCTCGTGGCCATAGTAC	chr2	26467579	26467763		3
Inflammation_2	NOTCH1	TXA0458970	NOTCH1_t26_1	GGTTAAGCTGGTTAGAGAACCCA	GCCAGCAGATGATCTTCCCGTA	225	60	GGTTAAGCTGGTTAGAGAACCCAGGGACACACTGGGAAACAGCCCACAACAGCAGGAGCTGGAGCACTCACCCACGGATGTCCATGGGGTCCAGCTCCCTGCGCTGGCGCCCACCACTGGTACCAGGAAGCAGTGAAGAGGTGGCCCAACCCACTGTAGAGCGCTTGATTGGGTGCTTGCGCAGCTCTTCCTCGTGGCCATAGTACGGGAAGATCATCTGCTGGC	chr2	26467558	26467782		5
Inflammation_2	chr2	TXA0458984	NOTCH1_t25_9	CTGCTGGCTGGGAACTGG	CCAGGTCTTTGCTGGGGTG	216	60	CTGCTGGCTGGGAACTGGCACTCAGGGCCGGTGAAGGATCCCAGGCATAGGCAGGTGGGACTACGTGGGCCCGAGATGCATGTACCACCGTTGAGGCAGCGTAAGCTGCCACAAGTGCGGGCATCATTCTCACATGTGGCACCCTCGAAGCCCTGTGGTGGAGAGAGGATGGTGCATTCAATCAGGGACACCATGCACACCCCAGCAAAGACCTGG	chr2	26468652	26468867		2
Inflammation_2	NOTCH1	TXA0458977	NOTCH1_t25_8	CTCACAGGTGCCCTGATTGTA	GAATGCACCATCCTCTCTCCAC	225	61	CTCACAGGTGCCCTGATTGTAGCAGGGGTTGCTACCCACACAGGGGCTGCTGGCTGGGAACTGGCACTCAGGGCCGGTGAAGGATCCCAGGCATAGGCAGGTGGGACTACGTGGGCCCGAGATGCATGTACCACCGTTGAGGCAGCGTAAGCTGCCACAAGTGCGGGCATCATTCTCACATGTGGCACCCTCGAAGCCCTGTGGTGGAGAGAGGATGGTGCATTC	chr2	26468606	26468830		4
Inflammation_2	chr2	TXA0458980	NOTCH1_t25_7	GTGGCACAGTAGCCCGTT	ATCTCGGGCCCACGTAGT	189	61	GTGGCACAGTAGCCCGTTGAATTTGGCAGGGCATAGACAGCGGTAGAAAGGGTTCTCGGATGTGGGCTCACAGGTGCCCTGATTGTAGCAGGGGTTGCTACCCACACAGGGGCTGCTGGCTGGGAACTGGCACTCAGGGCCGGTGAAGGATCCCAGGCATAGGCAGGTGGGACTACGTGGGCCCGAGAT	chr2	26468540	26468728		1
Inflammation_2	NOTCH1	TXA0458975	NOTCH1_t25_6	GCTCACAGGCCTCCTCAATC	CCTATGCCTGGGATCCTTCAC	236	61	GCTCACAGGCCTCCTCAATCTGCGGTGGGGGAATGTCGCGCCCAGCGCCACCTGTGAAGCTGTAGTCCAGGATGTGGCACAGTAGCCCGTTGAATTTGGCAGGGCATAGACAGCGGTAGAAAGGGTTCTCGGATGTGGGCTCACAGGTGCCCTGATTGTAGCAGGGGTTGCTACCCACACAGGGGCTGCTGGCTGGGAACTGGCACTCAGGGCCGGTGAAGGATCCCAGGCATAGG	chr2	26468467	26468702		6
Inflammation_2	chr2	TXA0458981	NOTCH1_t25_5	GCGTGATTATTACACTGCAGGTTG	CCACATCCGAGAACCCTTTCTAC	199	57	GCGTGATTATTACACTGCAGGTTGCAGACCTTATTGCCTGCATCCACCTGGCACTCAGGCAGCTCACAGGCCTCCTCAATCTGCGGTGGGGGAATGTCGCGCCCAGCGCCACCTGTGAAGCTGTAGTCCAGGATGTGGCACAGTAGCCCGTTGAATTTGGCAGGGCATAGACAGCGGTAGAAAGGGTTCTCGGATGTGG	chr2	26468406	26468604		7
Inflammation_2	NOTCH1	TXA0458976	NOTCH1_t25_4	GGCCGTCGCTAAAATACTTCCAG	CATCCTGGACTACAGCTTCACAG	233	57	GGCCGTCGCTAAAATACTTCCAGCACTGTAGAGACTGCGTGCAGTTCTTCCAGGGGTCATTGAAGTTGAGGGAGCAGTCGCCACCATCCCAGCCACATGCGTGATTATTACACTGCAGGTTGCAGACCTTATTGCCTGCATCCACCTGGCACTCAGGCAGCTCACAGGCCTCCTCAATCTGCGGTGGGGGAATGTCGCGCCCAGCGCCACCTGTGAAGCTGTAGTCCAGGATG	chr2	26468308	26468540		2
Inflammation_2	chr2	TXA0458983	NOTCH1_t25_3	CCGAGTTGCACTGGCTGTC	GACATTCCCCCACCGCAGA	220	56	CCGAGTTGCACTGGCTGTCACAGTGGCCGTCGCTAAAATACTTCCAGCACTGTAGAGACTGCGTGCAGTTCTTCCAGGGGTCATTGAAGTTGAGGGAGCAGTCGCCACCATCCCAGCCACATGCGTGATTATTACACTGCAGGTTGCAGACCTTATTGCCTGCATCCACCTGGCACTCAGGCAGCTCACAGGCCTCCTCAATCTGCGGTGGGGGAATGTC	chr2	26468284	26468503		3
Inflammation_2	chr2	TXA0458982	NOTCH1_t25_2	TGAGCCCTGGGACTCTAA	CACGCATGTGGCTGGG	217	56	TGAGCCCTGGGACTCTAAAGAAACTCAGCCTTACTTACTTGCACTGTCCCTCGGTGAGCTGGCAGTCGAAGCCATCAAAGAGGCAGCCGGCCGAGTTGCACTGGCTGTCACAGTGGCCGTCGCTAAAATACTTCCAGCACTGTAGAGACTGCGTGCAGTTCTTCCAGGGGTCATTGAAGTTGAGGGAGCAGTCGCCACCATCCCAGCCACATGCGTG	chr2	26468194	26468410		8
Inflammation_2	NOTCH1	TXA0458978	NOTCH1_t25_1	CTGGTGTTTGGTTAGGTCCTCC	GGCGACTGCTCCCTCAAC	228	56	CTGGTGTTTGGTTAGGTCCTCCCGTAGCATCCTGAGCCCTGGGACTCTAAAGAAACTCAGCCTTACTTACTTGCACTGTCCCTCGGTGAGCTGGCAGTCGAAGCCATCAAAGAGGCAGCCGGCCGAGTTGCACTGGCTGTCACAGTGGCCGTCGCTAAAATACTTCCAGCACTGTAGAGACTGCGTGCAGTTCTTCCAGGGGTCATTGAAGTTGAGGGAGCAGTCGCC	chr2	26468162	26468389		5
Inflammation_2	chr2	TXA0490642	NOTCH1_t24_2	TTCAGGCACCCTCAGACC	TCAACAGGGATGGCTCCTTA	208	61	TTCAGGCACCCTCAGACCTGGCACCCTTGCAGCCGCACAGGGCCAGGGACACCTACCGCAGGGCACCTACAGATGAATCCACGGGCGGTGTTGGAGGCCACGGCACAGACACCCCCATTCTTGCAAGGTTTGCCCCTGCAGCCATTGATGACTGACTCACAGCGGCGTCCTGTGTGAAGAAGGGACAGTAAGGAGCCATCCCTGTTGA	chr2	26469549	26469756		3
Inflammation_2	NOTCH1	TXA0458979	NOTCH1_t24_1	GGACAGATCCACCATAAGAGTCG	ATGGCTCCTTACTGTCCCTTCTT	229	60	GGACAGATCCACCATAAGAGTCGGTCAGGGTTCAGGCACCCTCAGACCTGGCACCCTTGCAGCCGCACAGGGCCAGGGACACCTACCGCAGGGCACCTACAGATGAATCCACGGGCGGTGTTGGAGGCCACGGCACAGACACCCCCATTCTTGCAAGGTTTGCCCCTGCAGCCATTGATGACTGACTCACAGCGGCGTCCTGTGTGAAGAAGGGACAGTAAGGAGCCAT	chr2	26469519	26469747		6
Inflammation_2	chr2	TXA0458989	NOTCH1_t23_4	TTCATTGACATCACCCTCACA	CGGTGTCTCTGGTCACTC	190	58	TTCATTGACATCACCCTCACACCGCTCCCCGACGAAGCCTGGTGGGCAGGTGCAGGTATAGCCACCCACCTGGTCCACACAGGTGCCATTGTTGAAGCACTTGGGGCTTCGGGAGGCAGGGTCAAGGGGGGGATGGCAGTCATCAACATTGATCTCACAGTGTACACCTGCAGAGTGACCAGAGACACCG	chr2	26469892	26470081		5
Inflammation_2	NOTCH1	TXA0458987	NOTCH1_t23_3	CAGGGGTTGGAGAGACATTCATT	GACAGAGCACAGTCAGCATCATC	233	58	CAGGGGTTGGAGAGACATTCATTGACATCACCCTCACACCGCTCCCCGACGAAGCCTGGTGGGCAGGTGCAGGTATAGCCACCCACCTGGTCCACACAGGTGCCATTGTTGAAGCACTTGGGGCTTCGGGAGGCAGGGTCAAGGGGGGGATGGCAGTCATCAACATTGATCTCACAGTGTACACCTGCAGAGTGACCAGAGACACCGTCGGATGATGCTGACTGTGCTCTGTC	chr2	26469875	26470107		4
Inflammation_2	chr2	TXA0458990	NOTCH1_t23_2	CCACCCACCCGTTCGAC	CAATGGCACCTGTGTGGAC	220	62	CCACCCACCCGTTCGACCCACCTGCCCAAGGCACGCACCAGTGTGGCCAGCCCGGCACTCGCAGTGGAAGTCATTAACACGCTGCACACAGTTCTGGGTGCCACGTGGGTCACAGGGGTTGGAGAGACATTCATTGACATCACCCTCACACCGCTCCCCGACGAAGCCTGGTGGGCAGGTGCAGGTATAGCCACCCACCTGGTCCACACAGGTGCCATTG	chr2	26469763	26469982		7
Inflammation_2	NOTCH1	TXA0458988	NOTCH1_t23_1	GTGAAGAAGGGACAGTAAGGAGC	GTGGGTGGCTATACCTGCAC	239	62	GTGAAGAAGGGACAGTAAGGAGCCATCCCTGTTGACCCTGCCCACCCACCCGTTCGACCCACCTGCCCAAGGCACGCACCAGTGTGGCCAGCCCGGCACTCGCAGTGGAAGTCATTAACACGCTGCACACAGTTCTGGGTGCCACGTGGGTCACAGGGGTTGGAGAGACATTCATTGACATCACCCTCACACCGCTCCCCGACGAAGCCTGGTGGGCAGGTGCAGGTATAGCCACCCAC	chr2	26469722	26469960		1
Inflammation_2	chr2	TXA0458995	NOTCH1_t22_3	AGGAGTTGGTCAGATCAATGCAG	TGCATGGCAAGTGGAGGAC	169	55	AGGAGTTGGTCAGATCAATGCAGGTACCCCCATTCTGGCAGGGCTGGGACAGGCACTCGTTGATCTCCTCGGAGCAGTTAGACCCATGGTAGCCAGCCACACACTGTAGAAATGGCACAGGTCACAGCTTAGCTGGGGTTGTGGTATCATGTCCTCCACTTGCCATGCA	chr2	26470304	26470472		7
Inflammation_2	NOTCH1	TXA0458991	NOTCH1_t22_2	TATTCCGTGGTCAGCTCTCAATC	TAAGCTGTGACCTGTGCCATTTC	237	56	TATTCCGTGGTCAGCTCTCAATCACCTGAGTGATCTCTGGCTGGATCCTGCCCATCATCCAGGTCCCTACCCTTACCCTGTGTCCCCCGGGGGCAGGAACACTTGTAGGAGTTGGTCAGATCAATGCAGGTACCCCCATTCTGGCAGGGCTGGGACAGGCACTCGTTGATCTCCTCGGAGCAGTTAGACCCATGGTAGCCAGCCACACACTGTAGAAATGGCACAGGTCACAGCTTA	chr2	26470198	26470434		8
Inflammation_2	chr2	TXA0458994	NOTCH1_t22_1	CTGAGATTCCTATTCCGTGGTCA	GGAGATCAACGAGTGCCTGTC	184	57	CTGAGATTCCTATTCCGTGGTCAGCTCTCAATCACCTGAGTGATCTCTGGCTGGATCCTGCCCATCATCCAGGTCCCTACCCTTACCCTGTGTCCCCCGGGGGCAGGAACACTTGTAGGAGTTGGTCAGATCAATGCAGGTACCCCCATTCTGGCAGGGCTGGGACAGGCACTCGTTGATCTCC	chr2	26470188	26470371		2
Inflammation_2	chr2	TXA0458997	NOTCH1_t21_4	CTCCATTCTGGCAGGGGTTAG	CAGCTCCTTCCCGTCTTGTC	174	59	CTCCATTCTGGCAGGGGTTAGGTGAGCACTCGTCCACCTCGTCCTCACAGTAGCTGCCCGTGTAGCCTGCCTGGCAGTGGCAGTAATGTTTATCTCCCTCATCCACACAGAGCCCTCCATGCTGGCACAGGAGAGTGACGTCAATGCCTGTGGGGACAAGACGGGAAGGAGCTG	chr2	26470860	26471033		2
Inflammation_2	NOTCH1	TXA0458993	NOTCH1_t21_3	CGAGATAGTCAGTGCAGGTAGC	GTCAGGTGACAATGGGCAGTA	240	59	CGAGATAGTCAGTGCAGGTAGCTCCATTCTGGCAGGGGTTAGGTGAGCACTCGTCCACCTCGTCCTCACAGTAGCTGCCCGTGTAGCCTGCCTGGCAGTGGCAGTAATGTTTATCTCCCTCATCCACACAGAGCCCTCCATGCTGGCACAGGAGAGTGACGTCAATGCCTGTGGGGACAAGACGGGAAGGAGCTGAGGCCTGGGCTGAGCTCTCGGGACTACTGCCCATTGTCACCTGAC	chr2	26470839	26471078		3
Inflammation_2	chr2	TXA0458996	NOTCH1_t21_2	CAACACTCACGCTGATACCCTC	TGCCAGGCAGGCTACAC	161	61	CAACACTCACGCTGATACCCTCCCCGCCACCCCATGACGGCCCACACCTTGCAGGAAAAGCCGCCGAGATAGTCAGTGCAGGTAGCTCCATTCTGGCAGGGGTTAGGTGAGCACTCGTCCACCTCGTCCTCACAGTAGCTGCCCGTGTAGCCTGCCTGGCA	chr2	26470775	26470935		6
Inflammation_2	NOTCH1	TXA0458992	NOTCH1_t21_1	GATGCACTAGCTCCCAGTCAAAA	TGTGTGGATGAGGGAGATAAACA	231	59	GATGCACTAGCTCCCAGTCAAAAGCCCTCCCCTGCAGCAACACTCACGCTGATACCCTCCCCGCCACCCCATGACGGCCCACACCTTGCAGGAAAAGCCGCCGAGATAGTCAGTGCAGGTAGCTCCATTCTGGCAGGGGTTAGGTGAGCACTCGTCCACCTCGTCCTCACAGTAGCTGCCCGTGTAGCCTGCCTGGCAGTGGCAGTAATGTTTATCTCCCTCATCCACACA	chr2	26470738	26470968		1
Inflammation_2	chr2	TXA0459002	NOTCH1_t20_3	TCACAGGACACACTGAGCAC	GTGCCCTAGCAGTCAGAGTTG	190	61	TCACAGGACACACTGAGCACGTCGCAGTTGACGCCAGTCCAGCCGCTGCGGCACTCACAGTGGTACTGCGTGTTGGTCTGCCAGCACCTGCCACCATTCTTGCAGGGAGCCGAGTCGCACCAGCGCACAAGGTTCTGAGGAGACAGGCGCTGGTTAGCTTCTCCCTGACCAACTCTGACTGCTAGGGCAC	chr2	26471172	26471361		5
Inflammation_2	NOTCH1	TXA0458998	NOTCH1_t20_2	GAGCCTGAGCAAGGACAGGT	GAGTTGGTCAGGGAGAAGCTAAC	235	63	GAGCCTGAGCAAGGACAGGTGGGCCCGGCCGGTTGGTTACCTCGCTTCTGTGCAGCCACCTCACAGGACACACTGAGCACGTCGCAGTTGACGCCAGTCCAGCCGCTGCGGCACTCACAGTGGTACTGCGTGTTGGTCTGCCAGCACCTGCCACCATTCTTGCAGGGAGCCGAGTCGCACCAGCGCACAAGGTTCTGAGGAGACAGGCGCTGGTTAGCTTCTCCCTGACCAACTC	chr2	26471112	26471346		4
Inflammation_2	chr2	TXA0459001	NOTCH1_t20_1	GCACCGGGGCACTCCT	CAGACCAACACGCAGTACCA	166	64	GCACCGGGGCACTCCTGGCCTAAGCTGAGCCTGAGCAAGGACAGGTGGGCCCGGCCGGTTGGTTACCTCGCTTCTGTGCAGCCACCTCACAGGACACACTGAGCACGTCGCAGTTGACGCCAGTCCAGCCGCTGCGGCACTCACAGTGGTACTGCGTGTTGGTCTG	chr2	26471086	26471251		7
Inflammation_2	NOTCH1	TXA0459057	NOTCH1_t2_2	TCTGCTCTGACAAAAGCAACAGG	TAGGCACCATGGCTTTAATCTCC	220	57	TCTGCTCTGACAAAAGCAACAGGTCCCCTCAGGGGCGGTACTCACACACAGGCTTCAGTGCCGTTGGCCACTTCGCACCTCCCTCCATTCAGGCAGGTCCCACTTGGCTGGGAGCATCTCAAGCCTGGGGGAAGGTCAGAAGAGAGAGGTCAGGCTTGGTTCTGGGCACCTAACTCCTTATAGTCCTGATGGTGGACGGAGATTAAAGCCATGGTGCCTA	chr2	26501836	26502055		7
Inflammation_2	chr2	TXA0459061	NOTCH1_t2_1	GACAATAGCCCAGTGTTCTGTCC	TGACCTCTCTCTTCTGACCTTCC	190	59	GACAATAGCCCAGTGTTCTGTCCCCAGAAGGCAGGGGCTCTGCTCTGACAAAAGCAACAGGTCCCCTCAGGGGCGGTACTCACACACAGGCTTCAGTGCCGTTGGCCACTTCGCACCTCCCTCCATTCAGGCAGGTCCCACTTGGCTGGGAGCATCTCAAGCCTGGGGGAAGGTCAGAAGAGAGAGGTCA	chr2	26501798	26501987		4
Inflammation_2	chr2	TXA0459004	NOTCH1_t19_4	GTACCACCGTGCAGACAGG	CTGGCAAGGACCTTAGGGAACTC	190	54	GTACCACCGTGCAGACAGGGCCGTGAATCACACTCATTGACATCATACTGACAGTAGCTGCCCGTGAAGCCAGGTGGACACAGACAGGTGAAGGAGTTGATACCATCCACACAGGTACCACCATTGAAGCAGGAGCTAGAGGCAGATGAGAAGCAGGGAAGAGTGAGGAGTTCCCTAAGGTCCTTGCCAG	chr2	26472138	26472327		8
Inflammation_2	NOTCH1	TXA0458999	NOTCH1_t19_3	ATAGCTGTCTTGGCAGGTACCAC	GTATTGTGGCCAGGTAGGCAT	240	53	ATAGCTGTCTTGGCAGGTACCACCGTGCAGACAGGGCCGTGAATCACACTCATTGACATCATACTGACAGTAGCTGCCCGTGAAGCCAGGTGGACACAGACAGGTGAAGGAGTTGATACCATCCACACAGGTACCACCATTGAAGCAGGAGCTAGAGGCAGATGAGAAGCAGGGAAGAGTGAGGAGTTCCCTAAGGTCCTTGCCAGGAGAGACAACTCCATGCCTACCTGGCCACAATAC	chr2	26472122	26472361		2
Inflammation_2	NOTCH1	TXA0459000	NOTCH1_t19_2	CCCTAGGCCTTCTGGGTCAT	TCAATGGTGGTACCTGTGTGGAT	234	53	CCCTAGGCCTTCTGGGTCATACCCTGTAACCTCAGCTCACCTGGCAGTTGAGACCAGTGTAGCCCTGTGGGCAGGTACACTTATAAGTACCATAGCTGTCTTGGCAGGTACCACCGTGCAGACAGGGCCGTGAATCACACTCATTGACATCATACTGACAGTAGCTGCCCGTGAAGCCAGGTGGACACAGACAGGTGAAGGAGTTGATACCATCCACACAGGTACCACCATTGA	chr2	26472031	26472264		7
Inflammation_2	chr2	TXA0459003	NOTCH1_t19_1	GGCACTGGAGAGCCCTA	GGCTTCACGGGCAGCTA	190	55	GGCACTGGAGAGCCCTAGGCCTTCTGGGTCATACCCTGTAACCTCAGCTCACCTGGCAGTTGAGACCAGTGTAGCCCTGTGGGCAGGTACACTTATAAGTACCATAGCTGTCTTGGCAGGTACCACCGTGCAGACAGGGCCGTGAATCACACTCATTGACATCATACTGACAGTAGCTGCCCGTGAAGCC	chr2	26472019	26472208		3
Inflammation_2	chr2	TXA0459009	NOTCH1_t18_4	TGTCCACACAGTCAGTGCAA	CCTAAGGCTCATCTTTCTGTCCC	184	56	TGTCCACACAGTCAGTGCAATTGGCACCATTTTGGCAGGGATTGCTGGCACATTCATTGATGTCCTCCTCACAGAAGGCACCCTGGAAGCCGGGCAGGCAGTCGCAGAAGGCTGTGTTGATGCCATCGGTGCAGGAACCCCCATTGTGACACGGGTCTGGAGGGACAGAAAGATGAGCCTTAGG	chr2	26472857	26473040		3
Inflammation_2	NOTCH1	TXA0459005	NOTCH1_t18_3	ATGTGTAGCTGTCCACACAGTC	CATACCACCTTCTCAGCATCAGG	240	56	ATGTGTAGCTGTCCACACAGTCAGTGCAATTGGCACCATTTTGGCAGGGATTGCTGGCACATTCATTGATGTCCTCCTCACAGAAGGCACCCTGGAAGCCGGGCAGGCAGTCGCAGAAGGCTGTGTTGATGCCATCGGTGCAGGAACCCCCATTGTGACACGGGTCTGGAGGGACAGAAAGATGAGCCTTAGGTGGCCACTGGCCATGCTTCGGGGACCTGATGCTGAGAAGGTGGTATG	chr2	26472848	26473087		8
Inflammation_2	chr2	TXA0459008	NOTCH1_t18_2	TCCACAGTCCATTTCTTTCCCTG	GGCTTCCAGGGTGCCTTC	210	54	TCCACAGTCCATTTCTTTCCCTGTCTCAGCTGAGGCTGGGACCCACCTCTCAGTACAGTCAGGTGTGTTGTTCTCGCAGTGGATGCCATTGAAGCCCACGGGGCAGGTACATGTGTAGCTGTCCACACAGTCAGTGCAATTGGCACCATTTTGGCAGGGATTGCTGGCACATTCATTGATGTCCTCCTCACAGAAGGCACCCTGGAAGCC	chr2	26472738	26472947		1
Inflammation_2	NOTCH1	TXA0459006	NOTCH1_t18_1	GCCATGCTGTCAAGACTTTGTG	CCTTCTGTGAGGAGGACATCAAT	222	53	GCCATGCTGTCAAGACTTTGTGTCTTCCACAGTCCATTTCTTTCCCTGTCTCAGCTGAGGCTGGGACCCACCTCTCAGTACAGTCAGGTGTGTTGTTCTCGCAGTGGATGCCATTGAAGCCCACGGGGCAGGTACATGTGTAGCTGTCCACACAGTCAGTGCAATTGGCACCATTTTGGCAGGGATTGCTGGCACATTCATTGATGTCCTCCTCACAGAAGG	chr2	26472713	26472934		5
Inflammation_2	chr2	TXA0459011	NOTCH1_t17_3	ACTCTCACAGTTGCGACCTGTAT	CTAGGACAGAGGCTCAGAGGG	189	56	ACTCTCACAGTTGCGACCTGTATAGCCGGCCTGGCAGAGGCAGCGGTAGCTGCCATTGGTGTTCTGGCAGGAGGCCCCATGGCGACATGGGCTTTTCACACACTCATTGATGTCAACCTCGCAGGTTTGACCTGTGAAGACAAAAACTCATTTGGTTACCTGCCCCCACCCTCTGAGCCTCTGTCCTAG	chr2	26473703	26473891		6
Inflammation_2	NOTCH1	TXA0459007	NOTCH1_t17_2	CATAGGATGGACAGAGCTGGGTA	GGGCAGGTAACCAAATGAGTTTT	218	55	CATAGGATGGACAGAGCTGGGTACCACTTACTGGGGCGGCAGTCATCGATGTCACTCTCACAGTTGCGACCTGTATAGCCGGCCTGGCAGAGGCAGCGGTAGCTGCCATTGGTGTTCTGGCAGGAGGCCCCATGGCGACATGGGCTTTTCACACACTCATTGATGTCAACCTCGCAGGTTTGACCTGTGAAGACAAAAACTCATTTGGTTACCTGCCC	chr2	26473650	26473867		1
Inflammation_2	chr2	TXA0459010	NOTCH1_t17_1	GCTCCCTGTCATGTGTGCTTA	CCTCCTGCCAGAACACCAAT	166	58	GCTCCCTGTCATGTGTGCTTAGGAACAGAGGCACCGAAACATAGGATGGACAGAGCTGGGTACCACTTACTGGGGCGGCAGTCATCGATGTCACTCTCACAGTTGCGACCTGTATAGCCGGCCTGGCAGAGGCAGCGGTAGCTGCCATTGGTGTTCTGGCAGGAGG	chr2	26473611	26473776		4
Inflammation_2	chr2	TXA0490643	NOTCH1_t16_2	CATCCACCATCCTTGTCCC	TGGGTTCTATCTTCTACAAATCTTTC	199	54	CATCCACCATCCTTGTCCCAGCCTGGTGGGACCAGGCAAGCCTCACCTTGCCAGCCTGTGGGACAGACACAGGAAAAACTCTCATAGTCTTCAGACTCCTTGCATACCCCGCTGTTTTTGCAGGGGCTGGTAGCACATGGGGCCAACACCACCTCACACGTGGCTCCTAGAAAGAAAGATTTGTAGAAGATAGAACCCA	chr2	26474075	26474273	Assays designed by relax mode and have no off-target hits	8
Inflammation_2	NOTCH1	TXA0459012	NOTCH1_t16_1	GGCCCCTGACTTCCCATC	CAGGCTCACTGGGTTCTATCTTC	222	55	GGCCCCTGACTTCCCATCCACCATCCTTGTCCCAGCCTGGTGGGACCAGGCAAGCCTCACCTTGCCAGCCTGTGGGACAGACACAGGAAAAACTCTCATAGTCTTCAGACTCCTTGCATACCCCGCTGTTTTTGCAGGGGCTGGTAGCACATGGGGCCAACACCACCTCACACGTGGCTCCTAGAAAGAAAGATTTGTAGAAGATAGAACCCAGTGAGCCTG	chr2	26474061	26474282		7
Inflammation_2	chr2	TXA0459016	NOTCH1_t15_2	CTTAGCTCCACTAGCTACCA	CCCACCTCCTCTTGCTC	197	53	CTTAGCTCCACTAGCTACCACCAGAGCCAATTCCAGTCCCTGGCTGTTCGTACCTGTATATGGCAGAGGACAGTTGCACTTGTATCCAGCGACATCATCAATGCAGGTCCCCTGGTTCAGGCAGGGGTTGGAGGCACATTCGTTGATGTTGGTCTGGCAATTAGGGCCTGTAAGGAAGTTGAGCAAGAGGAGGTGGG	chr2	26476021	26476217		2
Inflammation_2	NOTCH1	TXA0459013	NOTCH1_t15_1	AGCCCATATACTCTTAGCTCCACT	TTGAGGAAAGGCATAGGGCAGAG	239	53	AGCCCATATACTCTTAGCTCCACTAGCTACCACCAGAGCCAATTCCAGTCCCTGGCTGTTCGTACCTGTATATGGCAGAGGACAGTTGCACTTGTATCCAGCGACATCATCAATGCAGGTCCCCTGGTTCAGGCAGGGGTTGGAGGCACATTCGTTGATGTTGGTCTGGCAATTAGGGCCTGTAAGGAAGTTGAGCAAGAGGAGGTGGGCCAGAGCCTCTGCCCTATGCCTTTCCTCAA	chr2	26476009	26476247		5
Inflammation_2	chr2	TXA0459019	NOTCH1_t14_3	GCATACGTAGCCACTGGTCAT	AGTGGATGATGTGGCCTTGTC	212	54	GCATACGTAGCCACTGGTCATGTCCTTGCAGGTGCCACCGTTGACACAAGGGTTGGACTCACACTCGTTGTTGTTGATGTCACAGTTTGTTCCACTCCACCCAGGGGCACAGTCACACTTGTACCTACGGAGAGGCCTGAGCTGTAGCCTGGGCTCAGAGCTCTCCTGCTAAACTACAGTTCCAGTCTGAGGACAAGGCCACATCATCCACT	chr2	26476370	26476581		3
Inflammation_2	NOTCH1	TXA0459017	NOTCH1_t14_2	GACCGAGAAAGAGACCAAAGGGA	GCTACAGCTCAGGCCTCTC	227	56	GACCGAGAAAGAGACCAAAGGGAGGACCCATTCTGCTGTGTCACCCGCCACACTTACCACTGAAGCCTTCTCGGCAGGTGCATACGTAGCCACTGGTCATGTCCTTGCAGGTGCCACCGTTGACACAAGGGTTGGACTCACACTCGTTGTTGTTGATGTCACAGTTTGTTCCACTCCACCCAGGGGCACAGTCACACTTGTACCTACGGAGAGGCCTGAGCTGTAGC	chr2	26476291	26476517		1
Inflammation_2	chr2	TXA0459018	NOTCH1_t14_1	CTGCCTGAGAAATGCTAGCTCAT	AACAACAACGAGTGTGAGTCCAA	183	55	CTGCCTGAGAAATGCTAGCTCATCAGGTGGACCGAGAAAGAGACCAAAGGGAGGACCCATTCTGCTGTGTCACCCGCCACACTTACCACTGAAGCCTTCTCGGCAGGTGCATACGTAGCCACTGGTCATGTCCTTGCAGGTGCCACCGTTGACACAAGGGTTGGACTCACACTCGTTGTTGTT	chr2	26476262	26476444		6
Inflammation_2	chr2	TXA0459020	NOTCH1_t13_4	CTCGTTGACCTCGGACAG	TTAGCACAAGGGGAAACTTAGAC	240	60	CTCGTTGACCTCGGACAGGCACGTGGGGTCATGGTAGCCCTCGGGGCAGCGGCAAGTGAAGCCCGCGATGCCATCCTCACAAGTGCCCCCGTTGTGGCAGGGGCTGCCCGCACATTCGTCAATGTTGACGTTACACATGCTTCCTGTGGGTGGGAAGGGGCTCAGATTCCAAGCCTGCCACCCAGAGCCTACCCCTCCTAGAGCTAGACCTAGCTGGGTCTAAGTTTCCCCTTGTGCTAA	chr2	26476997	26477236		2
Inflammation_2	chr2	TXA0459022	NOTCH1_t13_3	GTTACTGTTGCACTCGTTGACCT	CTTGGAATCTGAGCCCCTTCC	185	61	GTTACTGTTGCACTCGTTGACCTCGGACAGGCACGTGGGGTCATGGTAGCCCTCGGGGCAGCGGCAAGTGAAGCCCGCGATGCCATCCTCACAAGTGCCCCCGTTGTGGCAGGGGCTGCCCGCACATTCGTCAATGTTGACGTTACACATGCTTCCTGTGGGTGGGAAGGGGCTCAGATTCCAAG	chr2	26476985	26477169		5
Inflammation_2	NOTCH1	TXA0459021	NOTCH1_t13_2	CCCAAGGCTACAGCTAGTCCC	ACAGGAAGCATGTGTAACGTCAA	239	61	CCCAAGGCTACAGCTAGTCCCTCCCAGGTCAGTCTGCCATACCCATTGAGGCCATCCCGGCAAGCTCCGTGGATGCAGGGGTTACTGTTGCACTCGTTGACCTCGGACAGGCACGTGGGGTCATGGTAGCCCTCGGGGCAGCGGCAAGTGAAGCCCGCGATGCCATCCTCACAAGTGCCCCCGTTGTGGCAGGGGCTGCCCGCACATTCGTCAATGTTGACGTTACACATGCTTCCTGT	chr2	26476905	26477143		4
Inflammation_2	chr2	TXA0459023	NOTCH1_t13_1	GGAGCACCCATTCACCCAG	TCGCGGGCTTCACTTGC	189	63	GGAGCACCCATTCACCCAGCCTGTGTCTGCCCAAGGCTACAGCTAGTCCCTCCCAGGTCAGTCTGCCATACCCATTGAGGCCATCCCGGCAAGCTCCGTGGATGCAGGGGTTACTGTTGCACTCGTTGACCTCGGACAGGCACGTGGGGTCATGGTAGCCCTCGGGGCAGCGGCAAGTGAAGCCCGCGA	chr2	26476876	26477064		7
Inflammation_2	chr2	TXA0459027	NOTCH1_t12_2	CCAGACTCTAGGGATGACC	CAGTGGGTGGAAAAGGGTG	216	57	CCAGACTCTAGGGATGACCCTGACCTCTGCCTTCAGCCACTCACCTGTGTAGCCTGGTTCACAGGCACATTCGTAGCCATCAATCTTGTCCAGACAGGTGCCAGAGTCACAGGGGTTGCTGGCGCAGTCATCCAGGTTGATCTCACAGTTGGGCCCTAGGGGCAGCATGACATGTGGTCAGCTTCCAAGCCTGGCCTCACCCTTTTCCACCCACTG	chr2	26477836	26478051		6
Inflammation_2	NOTCH1	TXA0459024	NOTCH1_t12_1	GTGACATCCAGCCCTTGGAC	GGCTTGGAAGCTGACCACAT	234	59	GTGACATCCAGCCCTTGGACCCTGGCTAGCCCCACAGTCCCTCCCAGACTCTAGGGATGACCCTGACCTCTGCCTTCAGCCACTCACCTGTGTAGCCTGGTTCACAGGCACATTCGTAGCCATCAATCTTGTCCAGACAGGTGCCAGAGTCACAGGGGTTGCTGGCGCAGTCATCCAGGTTGATCTCACAGTTGGGCCCTAGGGGCAGCATGACATGTGGTCAGCTTCCAAGCC	chr2	26477793	26478026		8
Inflammation_2	NOTCH1	TXA0459025	NOTCH1_t11_4	GTGGCACTCATTGATGTTGGTCT	GCCAACTAAGTGTTGAGGGAGTA	222	55	GTGGCACTCATTGATGTTGGTCTCACAGTGATGGCCTGTGTAGCCTGGCTGGCACAGGCAGGTAAAGGTGGCCACACCATCCTTACAGGAACCATAGTGGCAGGGGTCAGGGTCACACTCGTCAATGTCCACTTCGCAGTGGGTCCCTGTGTAACCTAGATGGCAGGAAAGGTGGACATTAGTGAGCTTCAGGGCCAGTTACTCCCTCAACACTTAGTTGGC	chr2	26478149	26478370		1
Inflammation_2	chr2	TXA0459028	NOTCH1_t11_3	CGGTTGGCTGTGGCACTC	GCTCACTAATGTCCACCTTTCCT	196	56	CGGTTGGCTGTGGCACTCATTGATGTTGGTCTCACAGTGATGGCCTGTGTAGCCTGGCTGGCACAGGCAGGTAAAGGTGGCCACACCATCCTTACAGGAACCATAGTGGCAGGGGTCAGGGTCACACTCGTCAATGTCCACTTCGCAGTGGGTCCCTGTGTAACCTAGATGGCAGGAAAGGTGGACATTAGTGAGC	chr2	26478140	26478335		7
Inflammation_2	chr2	TXA0459029	NOTCH1_t11_2	CCTCACCCTTTTCCACCCAC	CCACCTTTACCTGCCTGTGC	190	61	CCTCACCCTTTTCCACCCACTGCCAGCTCCGGCCAGTCACCTGTGGTTCCCTTGAGGCATAAGCAGAGGTAGGAGTTGTCACGGTCCTGGCAGGTGCCCCCATGGCGGCACGGTTGGCTGTGGCACTCATTGATGTTGGTCTCACAGTGATGGCCTGTGTAGCCTGGCTGGCACAGGCAGGTAAAGGTGG	chr2	26478030	26478219		3
Inflammation_2	NOTCH1	TXA0459026	NOTCH1_t11_1	TGACATGTGGTCAGCTTCCAA	TGGTTCCTGTAAGGATGGTGTG	240	59	TGACATGTGGTCAGCTTCCAAGCCTGGCCTCACCCTTTTCCACCCACTGCCAGCTCCGGCCAGTCACCTGTGGTTCCCTTGAGGCATAAGCAGAGGTAGGAGTTGTCACGGTCCTGGCAGGTGCCCCCATGGCGGCACGGTTGGCTGTGGCACTCATTGATGTTGGTCTCACAGTGATGGCCTGTGTAGCCTGGCTGGCACAGGCAGGTAAAGGTGGCCACACCATCCTTACAGGAACCA	chr2	26478003	26478242		5
Inflammation_2	NOTCH1	TXA0459030	NOTCH1_t10_2	ATCTAGCCTCAAGAGTTCCCTCC	GCAACCAAGGGGTTAGGATACTG	220	54	ATCTAGCCTCAAGAGTTCCCTCCCCCAGATCTTGCACTGCCTCTTGTACCTTCTGTACACACGCAGGTATAGGTGTTGGGCCCATCCAGGCACTTGGCACCGTTCTTGCATGGTGTGCTGGCACACTCATCCACATCATACTGGCACAGGTGCCCGTTGAAGCCTGTGGCCAGGGAAGACGAGATGGTTATATCTGACAGTATCCTAACCCCTTGGTTGC	chr2	26478558	26478777		4
Inflammation_2	chr2	TXA0459032	NOTCH1_t10_1	TGTCCCCTTCTCAGCACTATCTA	TCAGATATAACCATCTCGTCTTCCCT	215	54	TGTCCCCTTCTCAGCACTATCTAGCCTCAAGAGTTCCCTCCCCCAGATCTTGCACTGCCTCTTGTACCTTCTGTACACACGCAGGTATAGGTGTTGGGCCCATCCAGGCACTTGGCACCGTTCTTGCATGGTGTGCTGGCACACTCATCCACATCATACTGGCACAGGTGCCCGTTGAAGCCTGTGGCCAGGGAAGACGAGATGGTTATATCTGA	chr2	26478540	26478754		2
Inflammation_2	chr2	TXA0459063	NOTCH1_t1_2	TTCTGAAAGGCGCCCGAAG	AAAGAGGGCATCAGAGGGTGG	220	71	TTCTGAAAGGCGCCCGAAGTTGCGGGCTCGCGGGAGCCTACCTCTTGCGGCGAGCGCGGGCAGCAGCGTTAGGCAGAGCAAGGGCGTCAGGAGCCGTGGCATGCCTGCTCGCCAGCTGCCCGCAGCCCGGGCGGCGGCCTCTTGGGGTGGCCGGCGGGGATCGGACGTTGACGCACACCACCGGCGGTCCCGCAGGCGTCCACCCTCTGATGCCCTCTTT	chr2	26503457	26503676		6
Inflammation_2	NOTCH1	TXA0459062	NOTCH1_t1_1	GGTCCCTTACTCCTATCTACCCAA	GTGTGCGTCAACGTCCGAT	227	69	GGTCCCTTACTCCTATCTACCCAAAGCGTGCGCAGGGCGCAACAGAAGTTTCTGAAAGGCGCCCGAAGTTGCGGGCTCGCGGGAGCCTACCTCTTGCGGCGAGCGCGGGCAGCAGCGTTAGGCAGAGCAAGGGCGTCAGGAGCCGTGGCATGCCTGCTCGCCAGCTGCCCGCAGCCCGGGCGGCGGCCTCTTGGGGTGGCCGGCGGGGATCGGACGTTGACGCACAC	chr2	26503408	26503634		8
Inflammation_2	chr16	TXA0447360	NFKBIZ_t9_4	ACCAGGCTCTTATTCCTTAGT	TAAGGATAGTTACAGGGACCAAA	189	52	ACCAGGCTCTTATTCCTTAGTAAGAGGTCCTGCACTTCGGGCGAATGAGACTGCCGATTCCTCTGCAGTTCGTGCACCACCGCATTGTGAGCCACGACCGCGCAATGTAGGGGAGTCAGGCCTAGGAAAAAAGGGTACAAAGGAAGTCAGGCATCCCACCAAGTCTTTTGGTCCCTGTAACTATCCTTA	chr16	55815689	55815877		3
Inflammation_2	NFKBIZ	TXA0447357	NFKBIZ_t9_3	TTCCCTGTGAAGTTACCTTTGCC	GCCTGACTTCCTTTGTACCCTTT	217	53	TTCCCTGTGAAGTTACCTTTGCCTCCACTGCGGCTCCCATCTGAATCAGACACTTAATGGTGTCTACCAGGCTCTTATTCCTTAGTAAGAGGTCCTGCACTTCGGGCGAATGAGACTGCCGATTCCTCTGCAGTTCGTGCACCACCGCATTGTGAGCCACGACCGCGCAATGTAGGGGAGTCAGGCCTAGGAAAAAAGGGTACAAAGGAAGTCAGGC	chr16	55815624	55815840		4
Inflammation_2	chr16	TXA0447359	NFKBIZ_t9_2	GCCACGCCCACTTTTCTCT	GCTCACAATGCGGTGGTG	207	57	GCCACGCCCACTTTTCTCTGCCACGCCCCCTCCCCCACCCCAGCTCTACCTTCCCTGTGAAGTTACCTTTGCCTCCACTGCGGCTCCCATCTGAATCAGACACTTAATGGTGTCTACCAGGCTCTTATTCCTTAGTAAGAGGTCCTGCACTTCGGGCGAATGAGACTGCCGATTCCTCTGCAGTTCGTGCACCACCGCATTGTGAGC	chr16	55815574	55815780		7
Inflammation_2	NFKBIZ	TXA0447358	NFKBIZ_t9_1	GGGAGGAGTTAATCTGCGCTTG	CAGAGGAATCGGCAGTCTCATT	216	57	GGGAGGAGTTAATCTGCGCTTGCAAGCCAGGCCTCCGCCACGCCCACTTTTCTCTGCCACGCCCCCTCCCCCACCCCAGCTCTACCTTCCCTGTGAAGTTACCTTTGCCTCCACTGCGGCTCCCATCTGAATCAGACACTTAATGGTGTCTACCAGGCTCTTATTCCTTAGTAAGAGGTCCTGCACTTCGGGCGAATGAGACTGCCGATTCCTCTG	chr16	55815538	55815753		2
Inflammation_2	NFKBIZ	TXA0447361	NFKBIZ_t8_2	CCACTTTCCATGCAGTGCTTTAG	GTTTCCCGTAGGCTGCTTGTTA	235	44	CCACTTTCCATGCAGTGCTTTAGCCAATAAAGTATCAGCCTCTTACCATCATAGTTCGTTGCCTCAAGATCCACAAACTGATTGCTCCTCACAGCTCCCTTCTGGATGGCCTGCAAGGTTTATAAAATACACGCCTGTTATCCAAAGGTGGGGCAGACAAATAGGCATCTACTAGTGGGCTAAGGGATAAATCAACTCAAAGCATTATTGTTTTAACAAGCAGCCTACGGGAAAC	chr16	55816022	55816256		5
Inflammation_2	chr16	TXA0447364	NFKBIZ_t8_1	ATTTCATGCACCCCACTTTCCAT	CCTATTTGTCTGCCCCACCTTTG	177	46	ATTTCATGCACCCCACTTTCCATGCAGTGCTTTAGCCAATAAAGTATCAGCCTCTTACCATCATAGTTCGTTGCCTCAAGATCCACAAACTGATTGCTCCTCACAGCTCCCTTCTGGATGGCCTGCAAGGTTTATAAAATACACGCCTGTTATCCAAAGGTGGGGCAGACAAATAGG	chr16	55816010	55816186		6
Inflammation_2	NFKBIZ	TXA0447362	NFKBIZ_t7_4	CAGACATGCAGAGGTGTCCTTC	TTTCTGTGGACATTCCTCTCAGC	217	47	CAGACATGCAGAGGTGTCCTTCCCCAGCAATCCGTGGTGTTCACCTGGGCACCAAGGTTTACCAGATCTTGCACAATGAGGTGCTGATTGGCAGCTACCGCCACCTGAAAGGCACTCTGTGGACATATGGAGAGAAGATGGTTTTTTTTAAGCCTGTAACACTATCATAACAAGGAATATGAAACTAAACTGTGGCTGAGAGGAATGTCCACAGAAA	chr16	55816348	55816564		1
Inflammation_2	chr16	TXA0447365	NFKBIZ_t7_3	CCTCTTTTCTTACCTGGAGCA	AAACCATCTTCTCTCCATATGTC	188	54	CCTCTTTTCTTACCTGGAGCACCTGGGAGTGGCCCTTCTCCGCACAGACATGCAGAGGTGTCCTTCCCCAGCAATCCGTGGTGTTCACCTGGGCACCAAGGTTTACCAGATCTTGCACAATGAGGTGCTGATTGGCAGCTACCGCCACCTGAAAGGCACTCTGTGGACATATGGAGAGAAGATGGTTT	chr16	55816304	55816491		4
Inflammation_2	NFKBIZ	TXA0447363	NFKBIZ_t7_2	CGGCTCATATCCAAGCACATCTT	TATGTCCACAGAGTGCCTTTCAG	219	53	CGGCTCATATCCAAGCACATCTTTTGATAACAGAAGCCTGCTTTCTGGCCTCTTTTCTTACCTGGAGCACCTGGGAGTGGCCCTTCTCCGCACAGACATGCAGAGGTGTCCTTCCCCAGCAATCCGTGGTGTTCACCTGGGCACCAAGGTTTACCAGATCTTGCACAATGAGGTGCTGATTGGCAGCTACCGCCACCTGAAAGGCACTCTGTGGACATA	chr16	55816256	55816474		7
Inflammation_2	chr16	TXA0447366	NFKBIZ_t7_1	TACGGGAAACGGCTCATATCCAA	AATCAGCACCTCATTGTGCAAG	190	52	TACGGGAAACGGCTCATATCCAAGCACATCTTTTGATAACAGAAGCCTGCTTTCTGGCCTCTTTTCTTACCTGGAGCACCTGGGAGTGGCCCTTCTCCGCACAGACATGCAGAGGTGTCCTTCCCCAGCAATCCGTGGTGTTCACCTGGGCACCAAGGTTTACCAGATCTTGCACAATGAGGTGCTGATT	chr16	55816247	55816436		2
Inflammation_2	chr16	TXA0447368	NFKBIZ_t6_2	CCTCACTCCAGCACTCCAT	GTGAAGGAAATTTTTCTCTGATCAAC	220	49	CCTCACTCCAGCACTCCATCTTAGCCGAGGCAGCACCCTCACCTGTCCATTGTGCTCCTTAATGTCCAGCATGTGAAGAGCGTTCATCTTTCTTGCAAGGACATACGAGAGCGCTCGCCTCCCTTGGGCAACAGCAATATGGAGAAACCTGGTGAAGAGGCGAAAGAAAGAGGAATTGTTTCTGACTTCATTAGGTTGATCAGAGAAAAATTTCCTTCAC	chr16	55816789	55817008		3
Inflammation_2	NFKBIZ	TXA0447367	NFKBIZ_t6_1	GAGGCTCTTAAACAGTCTGCAC	TGATCAACCTAATGAAGTCAGAAACA	239	51	GAGGCTCTTAAACAGTCTGCACTGGAGACCGGCTACCCCTCACTCCAGCACTCCATCTTAGCCGAGGCAGCACCCTCACCTGTCCATTGTGCTCCTTAATGTCCAGCATGTGAAGAGCGTTCATCTTTCTTGCAAGGACATACGAGAGCGCTCGCCTCCCTTGGGCAACAGCAATATGGAGAAACCTGGTGAAGAGGCGAAAGAAAGAGGAATTGTTTCTGACTTCATTAGGTTGATCA	chr16	55816752	55816990		8
Inflammation_2	chr16	TXA0447375	NFKBIZ_t5_9	GAACTGCAGGGGTGAGTTGT	GCCAGGCCTTCTCTCCAC	182	55	GAACTGCAGGGGTGAGTTGTGGGGATAATTCTGTTGATGTTGCTGCTGTGGTGGCAGCGGCGGCGGCTGCTGCATGTTCTGTGTTTGTGGCGAATACTGGTACATTGACGCCTGGTCCATCATCTGTGGAGAGCCACTGACTTGGAACGGTTGGTATTTCTGAGGTGGAGAGAAGGCCTGGC	chr16	55818142	55818323		1
Inflammation_2	NFKBIZ	TXA0447369	NFKBIZ_t5_8	GAACTGTGGCTCGTGAGTATCAA	CCTCAGAAATACCAACCGTTCCA	237	52	GAACTGTGGCTCGTGAGTATCAAAGAGGTTGGAATCATACTTGGGAGACTGGGACATTCTGGAGTAAGGACTGAACTGCAGGGGTGAGTTGTGGGGATAATTCTGTTGATGTTGCTGCTGTGGTGGCAGCGGCGGCGGCTGCTGCATGTTCTGTGTTTGTGGCGAATACTGGTACATTGACGCCTGGTCCATCATCTGTGGAGAGCCACTGACTTGGAACGGTTGGTATTTCTGAGG	chr16	55818070	55818306		3
Inflammation_2	chr16	TXA0447378	NFKBIZ_t5_7	GGGCCAGTCAGTAAAGACAC	CACAGCAGCAACATCAACAGAAT	160	49	GGGCCAGTCAGTAAAGACACAAAACTTTGGCCCGTGCAGAACTGTGGCTCGTGAGTATCAAAGAGGTTGGAATCATACTTGGGAGACTGGGACATTCTGGAGTAAGGACTGAACTGCAGGGGTGAGTTGTGGGGATAATTCTGTTGATGTTGCTGCTGTG	chr16	55818032	55818191		5
Inflammation_2	NFKBIZ	TXA0447370	NFKBIZ_t5_6	TTGGCATCAGGCTGAAGGTCT	ACAGAATTATCCCCACAACTCACC	239	54	TTGGCATCAGGCTGAAGGTCTGCAGCTGAGTCTCAGTTTGGGGTGGAATGCTGGTGGGAGCCGGAACGGGAACAGCAAGAGACTCGGGTTCCCCCGGGCCAGTCAGTAAAGACACAAAACTTTGGCCCGTGCAGAACTGTGGCTCGTGAGTATCAAAGAGGTTGGAATCATACTTGGGAGACTGGGACATTCTGGAGTAAGGACTGAACTGCAGGGGTGAGTTGTGGGGATAATTCTGT	chr16	55817937	55818175		2
Inflammation_2	chr16	TXA0447380	NFKBIZ_t5_5	CGGCCTCGCAGGCATT	CCCAGTCTCCCAAGTATGATTCC	204	57	CGGCCTCGCAGGCATTGCTTGGCATCAGGCTGAAGGTCTGCAGCTGAGTCTCAGTTTGGGGTGGAATGCTGGTGGGAGCCGGAACGGGAACAGCAAGAGACTCGGGTTCCCCCGGGCCAGTCAGTAAAGACACAAAACTTTGGCCCGTGCAGAACTGTGGCTCGTGAGTATCAAAGAGGTTGGAATCATACTTGGGAGACTGGG	chr16	55817919	55818122		8
Inflammation_2	chr16	TXA0447382	NFKBIZ_t5_4	ACCTGCCACTGAAAAAATGACTTC	GCATTCCACCCCAAACTGAGA	187	58	ACCTGCCACTGAAAAAATGACTTCCCCAGCTGGGTGGTATTCATCGGGCTTCCCATGATGTTCTGGAGTGACAGGGACGTGCCCAAAGAGTGCGAGCCCACATCGTGCACCCCGACGACGGCCTCGCAGGCATTGCTTGGCATCAGGCTGAAGGTCTGCAGCTGAGTCTCAGTTTGGGGTGGAATGC	chr16	55817801	55817987		7
Inflammation_2	NFKBIZ	TXA0447371	NFKBIZ_t5_3	TTGCTTTCTTCCTGCTCTACCTG	GAGTCTCTTGCTGTTCCCGTTC	239	57	TTGCTTTCTTCCTGCTCTACCTGCCACTGAAAAAATGACTTCCCCAGCTGGGTGGTATTCATCGGGCTTCCCATGATGTTCTGGAGTGACAGGGACGTGCCCAAAGAGTGCGAGCCCACATCGTGCACCCCGACGACGGCCTCGCAGGCATTGCTTGGCATCAGGCTGAAGGTCTGCAGCTGAGTCTCAGTTTGGGGTGGAATGCTGGTGGGAGCCGGAACGGGAACAGCAAGAGACTC	chr16	55817783	55818021		4
Inflammation_2	NFKBIZ	TXA0447373	NFKBIZ_t5_2	CATCATCATGCCAACTAATAAGGTTC	CTCTTTGGGCACGTCCCTG	223	48	CATCATCATGCCAACTAATAAGGTTCAAGCGTGAAAGGACATGAACTAAAAAGATACTCACGTGTCACCATCTCCGTCCCTAGCGAGGAACTGGTCCTGGGGAATATTTGCCAATTTGCTTTCTTCCTGCTCTACCTGCCACTGAAAAAATGACTTCCCCAGCTGGGTGGTATTCATCGGGCTTCCCATGATGTTCTGGAGTGACAGGGACGTGCCCAAAGAG	chr16	55817668	55817890		8
Inflammation_2	NFKBIZ	TXA0447372	NFKBIZ_t5_11	CTGGTCTCTTGGCGAGTTCTG	TGCTTATGAGAGCTTCTTGTCCC	234	53	CTGGTCTCTTGGCGAGTTCTGGGGAACCGTGGGGCTCATCCAGCTAACCTGAACAGTGTTTAGTGAAACTGGGTTGCACTCATTCTTGATGTTTATAATATTCTGAAGCAGGGCAGCGCTGCTATCCAGCTTGGATTCGCTGTGGCGAACATCTTCCATGCTCTCCCCAGGTGTAGGCGTTTGCGGTGATGTCTAGAAGGGGGGGAGGGGGGGGACAAGAAGCTCTCATAAGCA	chr16	55818343	55818576		4
Inflammation_2	NFKBIZ	TXA0447374	NFKBIZ_t5_10	TGGCGAATACTGGTACATTGACG	CGCTGCCCTGCTTCAGAATA	232	51	TGGCGAATACTGGTACATTGACGCCTGGTCCATCATCTGTGGAGAGCCACTGACTTGGAACGGTTGGTATTTCTGAGGTGGAGAGAAGGCCTGGCCTCCATGGAAATCCTGGCACTGGTCTCTTGGCGAGTTCTGGGGAACCGTGGGGCTCATCCAGCTAACCTGAACAGTGTTTAGTGAAACTGGGTTGCACTCATTCTTGATGTTTATAATATTCTGAAGCAGGGCAGCG	chr16	55818229	55818460		8
Inflammation_2	chr16	TXA0447379	NFKBIZ_t5_1	AGAACAGCCTTCCTTGAAATATGA	CATGGGAAGCCCGATGAA	219	45	AGAACAGCCTTCCTTGAAATATGAATTATCATCATCATGCCAACTAATAAGGTTCAAGCGTGAAAGGACATGAACTAAAAAGATACTCACGTGTCACCATCTCCGTCCCTAGCGAGGAACTGGTCCTGGGGAATATTTGCCAATTTGCTTTCTTCCTGCTCTACCTGCCACTGAAAAAATGACTTCCCCAGCTGGGTGGTATTCATCGGGCTTCCCATG	chr16	55817639	55817857		6
Inflammation_2	NFKBIZ	TXA0447383	NFKBIZ_t4_2	AGCAACAATATCCCAGAATGAGT	ATTTGTCAGGTTGGGATGATGAC	216	52	AGCAACAATATCCCAGAATGAGTTCCACGGAGTGTTCAGAGGAAAACAGGGAGACGCTTACCACGAAGTGAGAAGGCAACAGAGCTGGCCTCTTGCAAACCGGTCCATCGGACAGAGGATCGGGTCCCTTTCTTTTCCCCACTGCGGACACTGCACTCTTCAGGTCTGTTCCCAAAGAAAGAAGGCGCGATCTGTCATCATCCCAACCTGACAAAT	chr16	55818687	55818902		2
Inflammation_2	chr16	TXA0447384	NFKBIZ_t4_1	TTTTTCAATAGCAACAATATCCCA	GATCGCGCCTTCTTTCTTTG	201	51	TTTTTCAATAGCAACAATATCCCAGAATGAGTTCCACGGAGTGTTCAGAGGAAAACAGGGAGACGCTTACCACGAAGTGAGAAGGCAACAGAGCTGGCCTCTTGCAAACCGGTCCATCGGACAGAGGATCGGGTCCCTTTCTTTTCCCCACTGCGGACACTGCACTCTTCAGGTCTGTTCCCAAAGAAAGAAGGCGCGATC	chr16	55818678	55818878		7
Inflammation_2	chr16	TXA0447387	NFKBIZ_t3_2	ATCGTTTCACTCAAAGAGGACCC	CAGATCTCCACCGAGTGAGAAAC	161	43	ATCGTTTCACTCAAAGAGGACCCGGGTAAGATTATGGAAAAAAAAAAAAAAATAGATGGAGCTCTTACCTGTCAGCTGCTCAATGTTCACACTCTGTGTCTGCAATGGGAAAGGGTCCAGCTTAGTACATACAACATGGTTTCTCACTCGGTGGAGATCTG	chr16	55818924	55819084		3
Inflammation_2	NFKBIZ	TXA0447385	NFKBIZ_t3_1	CTGTCATCATCCCAACCTGACAA	GCTTATGGGGTTCTGTAGAGGGT	238	45	CTGTCATCATCCCAACCTGACAAATTCCATTTATATCCCCCACGGAATCGTTTCACTCAAAGAGGACCCGGGTAAGATTATGGAAAAAAAAAAAAAAATAGATGGAGCTCTTACCTGTCAGCTGCTCAATGTTCACACTCTGTGTCTGCAATGGGAAAGGGTCCAGCTTAGTACATACAACATGGTTTCTCACTCGGTGGAGATCTGTCTCTCCTACCCTCTACAGAACCCCATAAGC	chr16	55818878	55819115		1
Inflammation_2	NFKBIZ	TXA0447386	NFKBIZ_t2_2	ACTAGTCTCCCACCCACTCAAAA	TCGGGATTCATGTCTGTGAAGAG	235	54	ACTAGTCTCCCACCCACTCAAAACAAAGAGCAGAAGCCGCCACCTTAAACTCATCCACGGGCTGGCCGGAAGCCTTCTGCTTGTTGCTTCGGATGTGTAGCAGGAGCTCCTTCACCGAGTTCTTCACGCGAACACCTTGAAAGGGGCCTCTCTGCTGCCTGCCAACCCCCATGTGGGGCTCAACTGTTCAGAAGGACAAGTCTCAATTACATCTCTTCACAGACATGAATCCCGA	chr16	55819524	55819758		6
Inflammation_2	NFKBIZ	TXA0491118	NFKBIZ_t2_1	AACCACAATAACCTTCACGGACT	ATTGAGACTTGTCCTTCTGAACA	227	54	AACCACAATAACCTTCACGGACTAGTCTCCCACCCACTCAAAACAAAGAGCAGAAGCCGCCACCTTAAACTCATCCACGGGCTGGCCGGAAGCCTTCTGCTTGTTGCTTCGGATGTGTAGCAGGAGCTCCTTCACCGAGTTCTTCACGCGAACACCTTGAAAGGGGCCTCTCTGCTGCCTGCCAACCCCCATGTGGGGCTCAACTGTTCAGAAGGACAAGTCTCAAT	chr16	55819504	55819730		5
Inflammation_2	chr16	TXA0447350	NFKBIZ_t12_2	TACATCAGGACTGCCTAACTGAC	TATACCGCTTGGAGCATTGGAAG	165	52	TACATCAGGACTGCCTAACTGACAGTGAGTGTCGCTGAACCAGGCTCCACGCCAGTGGACCTAGTATGGTGGTGCTCGCTGCTGAATGGACTTCCCCTTCAGGATACGTCGGATCTGGAAGAGAAAGGAATCGTGGAACTTACTTCCAATGCTCCAAGCGGTATA	chr16	55812670	55812834		7
Inflammation_2	NFKBIZ	TXA0447345	NFKBIZ_t12_1	GCCAATACAGGGCAAATGGTCTA	TGAGAGGAGTGAAAATCTGGGAG	222	50	GCCAATACAGGGCAAATGGTCTATGTACAGATACATCAGGACTGCCTAACTGACAGTGAGTGTCGCTGAACCAGGCTCCACGCCAGTGGACCTAGTATGGTGGTGCTCGCTGCTGAATGGACTTCCCCTTCAGGATACGTCGGATCTGGAAGAGAAAGGAATCGTGGAACTTACTTCCAATGCTCCAAGCGGTATATGTCTCCCAGATTTTCACTCCTCTCA	chr16	55812639	55812860		6
Inflammation_2	chr16	TXA0447352	NFKBIZ_t11_4	GCTCCCTTCCTCATCAACAG	GGTAATTTTCAGAACCTCAGTGC	219	57	GCTCCCTTCCTCATCAACAGGCGGACTGCGTCCAACTGTGTCACCCGATACTGCAGGCTGGCAGCAACATGGAGGGCGGTGTTTCCATTGTAAGCCTGAAAGCAAGAGGACAGAAGCGCGCATGCGTCAGGCAGAGGGCCATTCCAGGAAAGGAGCTCAAAGGCGTGGAGGTGGGAAGGTCATTCCCACGCTGGCAGCACTGAGGTTCTGAAAATTACC	chr16	55814023	55814241		4
Inflammation_2	chr16	TXA0447354	NFKBIZ_t11_3	GGCCATCGGGGACCAAAT	CATGCGCGCTTCTGTCCT	183	57	GGCCATCGGGGACCAAATGCACGGGCTGTTCATTCTCCAAGTTCCGAGTACTGGGGTCAGCTCCCTTCCTCATCAACAGGCGGACTGCGTCCAACTGTGTCACCCGATACTGCAGGCTGGCAGCAACATGGAGGGCGGTGTTTCCATTGTAAGCCTGAAAGCAAGAGGACAGAAGCGCGCATG	chr16	55813964	55814146		2
Inflammation_2	chr16	TXA0447353	NFKBIZ_t11_2	TCGCAAGGGCCTAAAGGAAC	GTATCGGGTGACACAGTTGGAC	169	59	TCGCAAGGGCCTAAAGGAACTTCCACTCCCTCCTGTGGCCCTCACCTGTTCTCCCACTGGGCCATCGGGGACCAAATGCACGGGCTGTTCATTCTCCAAGTTCCGAGTACTGGGGTCAGCTCCCTTCCTCATCAACAGGCGGACTGCGTCCAACTGTGTCACCCGATAC	chr16	55813905	55814073		5
Inflammation_2	NFKBIZ	TXA0447351	NFKBIZ_t11_1	ATATTTCAGTCGCAAGGGCCTAA	TGTCCTCTTGCTTTCAGGCTTAC	239	56	ATATTTCAGTCGCAAGGGCCTAAAGGAACTTCCACTCCCTCCTGTGGCCCTCACCTGTTCTCCCACTGGGCCATCGGGGACCAAATGCACGGGCTGTTCATTCTCCAAGTTCCGAGTACTGGGGTCAGCTCCCTTCCTCATCAACAGGCGGACTGCGTCCAACTGTGTCACCCGATACTGCAGGCTGGCAGCAACATGGAGGGCGGTGTTTCCATTGTAAGCCTGAAAGCAAGAGGACA	chr16	55813896	55814134		3
Inflammation_2	chr16	TXA0447356	NFKBIZ_t10_2	CGTGGAGGTGGGAAGGTCAT	CTCTGGGGCGTGGCATC	219	54	CGTGGAGGTGGGAAGGTCATTCCCACGCTGGCAGCACTGAGGTTCTGAAAATTACCTTGGCATTCACGAAAGACAGGCAACTGGGCAACTCCAAAAAGAGGCGAATGAGTTCCAGATTTGCTTCTTCCGCTGCCAAGTGCAGGGCTGTGCGGCCACTCTTACGATCCTTGGGAAGGCAAGAAAGGCGAAGACTGAAAATCCAGATGCCACGCCCCAGAG	chr16	55814186	55814404		1
Inflammation_2	NFKBIZ	TXA0447355	NFKBIZ_t10_1	ATTCCAGGAAAGGAGCTCAAAGG	GCATCTGGATTTTCAGTCTTCGC	230	52	ATTCCAGGAAAGGAGCTCAAAGGCGTGGAGGTGGGAAGGTCATTCCCACGCTGGCAGCACTGAGGTTCTGAAAATTACCTTGGCATTCACGAAAGACAGGCAACTGGGCAACTCCAAAAAGAGGCGAATGAGTTCCAGATTTGCTTCTTCCGCTGCCAAGTGCAGGGCTGTGCGGCCACTCTTACGATCCTTGGGAAGGCAAGAAAGGCGAAGACTGAAAATCCAGATGC	chr16	55814163	55814392		8
Inflammation_2	chr16	TXA0447394	NFKBIZ_t1_5	CGAGGCGCCGTAGAAG	GTGGCGCAGGTGTCTG	160	70	CGAGGCGCCGTAGAAGTAAGCCAGGTTGAGCGGGCTGGTCATGAGGCCGCAGTCGCCGGCCGCGTCCAGCAGCCCCTCTCCGCCGCGGCTGTCGTCCAGCAGCTTGTCCACGATCATGCTCCCAGGCTAGGCGCTCGGGGTCCCCAGACACCTGCGCCAC	chr16	55821937	55822096		8
Inflammation_2	chr16	TXA0447391	NFKBIZ_t1_4	GACAGGTAGCCGGTGTC	CCAACCGCGTAGCCAT	220	71	GACAGGTAGCCGGTGTCGCCGGCGCCGGGGGCGGAAGGAGGCGAGGCGCCGTAGAAGTAAGCCAGGTTGAGCGGGCTGGTCATGAGGCCGCAGTCGCCGGCCGCGTCCAGCAGCCCCTCTCCGCCGCGGCTGTCGTCCAGCAGCTTGTCCACGATCATGCTCCCAGGCTAGGCGCTCGGGGTCCCCAGACACCTGCGCCACCGGATGGCTACGCGGTTGG	chr16	55821896	55822115		3
Inflammation_2	chr16	TXA0447396	NFKBIZ_t1_3	AGGAGGACACGGAGGAAGTG	GACTGCGGCCTCATGACC	169	71	AGGAGGACACGGAGGAAGTGGAGGAGAAATCGGAGGAGTCGGAGCCGGGCGAGCCGGGCGCGGAGGGCACGGCGGACAGGTAGCCGGTGTCGCCGGCGCCGGGGGCGGAAGGAGGCGAGGCGCCGTAGAAGTAAGCCAGGTTGAGCGGGCTGGTCATGAGGCCGCAGTC	chr16	55821822	55821990		1
Inflammation_2	NFKBIZ	TXA0447390	NFKBIZ_t1_2	GAACCCCGAATAGAGGGGCAA	CTCAACCTGGCTTACTTCTACGG	240	71	GAACCCCGAATAGAGGGGCAAGGAATCTCGCGGGTGGGTACCTTGAGGGCGCTCGGCGCGGGCGCCACCTCTGGGACGGGACTCCACGGCCCCGCAGGAGGACACGGAGGAAGTGGAGGAGAAATCGGAGGAGTCGGAGCCGGGCGAGCCGGGCGCGGAGGGCACGGCGGACAGGTAGCCGGTGTCGCCGGCGCCGGGGGCGGAAGGAGGCGAGGCGCCGTAGAAGTAAGCCAGGTTGAG	chr16	55821727	55821966		7
Inflammation_2	chr16	TXA0447395	NFKBIZ_t1_1	AAGTCCCTCCCCATCCTC	CTCCGACTCCTCCGATTTC	166	67	AAGTCCCTCCCCATCCTCCCAGCGTGTGAACCCCGAATAGAGGGGCAAGGAATCTCGCGGGTGGGTACCTTGAGGGCGCTCGGCGCGGGCGCCACCTCTGGGACGGGACTCCACGGCCCCGCAGGAGGACACGGAGGAAGTGGAGGAGAAATCGGAGGAGTCGGAG	chr16	55821700	55821865		4
Inflammation_2	IL1RC_t5	TXA0491125	IL1RC_t5_2	GACCCCTGCTTGTTGCTCTC	CACTGCTCAGATCAGACCCA	239	60	GACCCCTGCTTGTTGCTCTCAGCCTCTCTCCAGGCCCAGGTGGTGCTCTCCTTCCAGGCCTACCCCATCGCCCGCTGTGCCCTGCTGGAGGTCCAGGTGCCCGCTGACCTGGTGCAGCCTGGTCAGTCCGTGGTATGTGAAGGGCTCCTCCTGAGGAGAAGAGCCACCTCCAGAATCCCAGATTCCCTTAACAATCTCGTGCACTGTTTCCTTAAGTCTTGGGTCTGATCTGAGCAGTG	chr6	113472756	113472994		5
Inflammation_2	IL1RC_t5	TXA0491124	IL1RC_t5_1	GTCTAGGAACGGTGAGGAGC	TCAGGAGGAGCCCTTCACAT	231	64	GTCTAGGAACGGTGAGGAGCCAGCTGGCCCAACTACTGCTTCTAGTCAGGGTCTTTCCCGTGGCCCATGGCCTGGCTGACCCCTGCTTGTTGCTCTCAGCCTCTCTCCAGGCCCAGGTGGTGCTCTCCTTCCAGGCCTACCCCATCGCCCGCTGTGCCCTGCTGGAGGTCCAGGTGCCCGCTGACCTGGTGCAGCCTGGTCAGTCCGTGGTATGTGAAGGGCTCCTCCTGA	chr6	113472679	113472909		4
Inflammation_2	chr6	TXA0447288	IL17RC_t9_2	CTTTGGGCCTCCCCACTTC	TAGCCTGTCTCCCATGTACAGAT	164	48	CTTTGGGCCTCCCCACTTCCTCTTTCTTAGCTTCTCTTAACCCACTTCTGTCTACTCATCCCACAGACTGGACCTCAGAACATTACTTTAAACCACACAGACCTGGTTCCCTGCCTCTGCATTCAGGTAAGAGCAGAATTCATCTGTACATGGGAGACAGGCTA	chr6	113476669	113476832		8
Inflammation_2	IL17RC	TXA0447287	IL17RC_t9_1	GGTCTGTCTGTCCTTGGACTTTG	GACAGTGGTCCCAGAGGATTG	226	52	GGTCTGTCTGTCCTTGGACTTTGGGCCTCCCCACTTCCTCTTTCTTAGCTTCTCTTAACCCACTTCTGTCTACTCATCCCACAGACTGGACCTCAGAACATTACTTTAAACCACACAGACCTGGTTCCCTGCCTCTGCATTCAGGTAAGAGCAGAATTCATCTGTACATGGGAGACAGGCTAGGGAGGCACGGAGGGATGGCCTCCAATCCTCTGGGACCACTGTC	chr6	113476651	113476876		6
Inflammation_2	chr6	TXA0447286	IL17RC_t8_3	GACAATGTCCTTCTGACACTGGA	TTGACAGTTTGCCGACATCCTTA	180	51	GACAATGTCCTTCTGACACTGGATGTCTCTGAGGAGCAGGACTTTAGCTTCTTACTGTACCTGCGTCCAGTCCCGGATGCTCTCAAATCCTTGTGGTACAAAAACCTGGTGAGGCTTCTCCTCTAGACCCATGCTCTCCCTGTGCTGATGCCCATGCTAAGGATGTCGGCAAACTGTCAA	chr6	113476431	113476610		2
Inflammation_2	IL17RC	TXA0447284	IL17RC_t8_2	GAAGAGAGTCTGAACTTCCCCAT	GGAGAGCATGGGTCTAGAGGA	216	51	GAAGAGAGTCTGAACTTCCCCATCTCTCTCTGCTTTTCCCACTAGTCCTGCCCTGGCTCAATGTGTCTACAGATGGTGACAATGTCCTTCTGACACTGGATGTCTCTGAGGAGCAGGACTTTAGCTTCTTACTGTACCTGCGTCCAGTCCCGGATGCTCTCAAATCCTTGTGGTACAAAAACCTGGTGAGGCTTCTCCTCTAGACCCATGCTCTCC	chr6	113476354	113476569		1
Inflammation_2	chr6	TXA0447285	IL17RC_t8_1	GGCTTAGCTGTGCAGAGGG	CTGGACGCAGGTACAGTAAGAAG	169	52	GGCTTAGCTGTGCAGAGGGGGTGAAGAGAGTCTGAACTTCCCCATCTCTCTCTGCTTTTCCCACTAGTCCTGCCCTGGCTCAATGTGTCTACAGATGGTGACAATGTCCTTCTGACACTGGATGTCTCTGAGGAGCAGGACTTTAGCTTCTTACTGTACCTGCGTCCAG	chr6	113476332	113476500		7
Inflammation_2	chr6	TXA0447283	IL17RC_t7_2	GCTTCCCTTTTTGCCTTGGTC	ACCCCAAGCATCCAATTGTGTAA	177	59	GCTTCCCTTTTTGCCTTGGTCCCCATCCCCACTGGACGTTTTTCTGTGATCTCTCCCCAGACTGCAGGGGTCTTGAAGTCCGGGACAGCATCCAGAGCTGCTGGGGTAGGGGCCAGGGACAGTGGGCTGGGTGGGGGAGGGCAGGATCTGGAGTTTACACAATTGGATGCTTGGGGT	chr6	113474493	113474669		4
Inflammation_2	IL17RC	TXA0447281	IL17RC_t7_1	GGTTTGCACTGCTTCCCTTTTTG	GACTTTTGGAACCTGGCATCTCT	223	57	GGTTTGCACTGCTTCCCTTTTTGCCTTGGTCCCCATCCCCACTGGACGTTTTTCTGTGATCTCTCCCCAGACTGCAGGGGTCTTGAAGTCCGGGACAGCATCCAGAGCTGCTGGGGTAGGGGCCAGGGACAGTGGGCTGGGTGGGGGAGGGCAGGATCTGGAGTTTACACAATTGGATGCTTGGGGTTGACATCAGCCTCAGAGATGCCAGGTTCCAAAAGTC	chr6	113474483	113474705		5
Inflammation_2	IL17RC	TXA0447280	IL17RC_t6_2	CATTCTGAGCCCTTCACCTCC	CAGAAAGATGGGGAGTGACCAAA	223	56	CATTCTGAGCCCTTCACCTCCAGCCATCCACCACCCTCTCCTCATAGGGTTCTGCGGTATTTGACTGTTTCGAGGCTAGTCTTGGGGCTGAGGTACAGATCTGGTCCTACACGAAGCCCAGGTACCAGAAAGAGCTCAACCTCACACAGCAGCTGCCTGGTGAGTCACCCCAAAGTCCTGGTTCCCCAGTCTGCAGTCCCTTTGGTCACTCCCCATCTTTCTG	chr6	113474114	113474336		3
Inflammation_2	chr6	TXA0447282	IL17RC_t6_1	GACCTTGGCCTGCATTCTG	AGACTGGGGAACCAGGACTT	204	56	GACCTTGGCCTGCATTCTGAGCCCTTCACCTCCAGCCATCCACCACCCTCTCCTCATAGGGTTCTGCGGTATTTGACTGTTTCGAGGCTAGTCTTGGGGCTGAGGTACAGATCTGGTCCTACACGAAGCCCAGGTACCAGAAAGAGCTCAACCTCACACAGCAGCTGCCTGGTGAGTCACCCCAAAGTCCTGGTTCCCCAGTCT	chr6	113474102	113474305		2
Inflammation_2	IL17RC	TXA0447276	IL17RC_t5_1	CTGCTTCTAGTCAGGGTCTTTCC	GATTCTGGAGGTGGCTCTTCTC	219	64	CTGCTTCTAGTCAGGGTCTTTCCCGTGGCCCATGGCCTGGCTGACCCCTGCTTGTTGCTCTCAGCCTCTCTCCAGGCCCAGGTGGTGCTCTCCTTCCAGGCCTACCCCATCGCCCGCTGTGCCCTGCTGGAGGTCCAGGTGCCCGCTGACCTGGTGCAGCCTGGTCAGTCCGTGGTATGTGAAGGGCTCCTCCTGAGGAGAAGAGCCACCTCCAGAATC	chr6	113472714	113472932		7
Inflammation_2	chr6	TXA0447277	IL17RC_t4_2	CAAGGGAATCTAAGCCCGAACC	CCCTGACTAGAAGCAGTAGTTGG	178	56	CAAGGGAATCTAAGCCCGAACCAGCCCAGAGCAGATGCCCGACTTGGGCTTTGCTCTCTTCTCTGCTTCTTGCAGGGCACTGGGCAGAGCCTGAAGAAGCTGGAAAGTCTGATTCAGAACTCCAGGAGTCTAGGAACGGTGAGGAGCCAGCTGGCCCAACTACTGCTTCTAGTCAGGG	chr6	113472552	113472729		3
Inflammation_2	IL17RC	TXA0447275	IL17RC_t4_1	ATGGCATCTATGCAAGGGAATCT	GAGAGCAACAAGCAGGGGTC	236	57	ATGGCATCTATGCAAGGGAATCTAAGCCCGAACCAGCCCAGAGCAGATGCCCGACTTGGGCTTTGCTCTCTTCTCTGCTTCTTGCAGGGCACTGGGCAGAGCCTGAAGAAGCTGGAAAGTCTGATTCAGAACTCCAGGAGTCTAGGAACGGTGAGGAGCCAGCTGGCCCAACTACTGCTTCTAGTCAGGGTCTTTCCCGTGGCCCATGGCCTGGCTGACCCCTGCTTGTTGCTCTC	chr6	113472540	113472775		2
Inflammation_2	chr6	TXA0447273	IL17RC_t3_3	CCAGGCCCTGTGCTAGTG	CCCAGACAGGCTTATGTGTGC	163	61	CCAGGCCCTGTGCTAGTGCCTACCCGCCTGCAGACGGAGCTGGTGCTGAGGTGTCCACAGAAGACAGATTGCGCCCTCTGTGTCCGTGTGGTGGTCCACTTGGCCGTGCATGGTAAGTGAGGAAGCCCGCCCGTAACTGAGTGCACACATAAGCCTGTCTGGG	chr6	113472272	113472434		6
Inflammation_2	chr6	TXA0447274	IL17RC_t3_2	ATCACAAACCAAACCAGCTTCCA	GAGGGCGCAATCTGTCTTCT	162	62	ATCACAAACCAAACCAGCTTCCACCCCACCCCTTCACACCCAGATGGTGACGTGCTCTGCCTGCCTGGAAGCCTCCAGTCTGCCCCAGGCCCTGTGCTAGTGCCTACCCGCCTGCAGACGGAGCTGGTGCTGAGGTGTCCACAGAAGACAGATTGCGCCCTC	chr6	113472188	113472349		4
Inflammation_2	IL17RC	TXA0447271	IL17RC_t3_1	CCTCTGCAGGTATCACAAACCAA	CAGTTACGGGCGGGCTTC	234	62	CCTCTGCAGGTATCACAAACCAAACCAGCTTCCACCCCACCCCTTCACACCCAGATGGTGACGTGCTCTGCCTGCCTGGAAGCCTCCAGTCTGCCCCAGGCCCTGTGCTAGTGCCTACCCGCCTGCAGACGGAGCTGGTGCTGAGGTGTCCACAGAAGACAGATTGCGCCCTCTGTGTCCGTGTGGTGGTCCACTTGGCCGTGCATGGTAAGTGAGGAAGCCCGCCCGTAACTG	chr6	113472177	113472410		1
Inflammation_2	IL17RC	TXA0447270	IL17RC_t2_2	GAAGGGCTTAGGACAAGGAGC	AGCTGGTTTGGTTTGTGATACCT	240	54	GAAGGGCTTAGGACAAGGAGCGCTGGAAGGAGATAGGCAGTGGCTAGGGGGCTGTCAAGCAAGGAAAGGCGCTTGAATTGAATTGACTTTTTCTTCCTTCCCAGGGCCTCTCCTGCCACCTCTGGGGTAAGTATTGCTACTTGAAAAGAATGACTTCCAGGCGAGCTGAAGGGAAGCAACTGCTGGCGCTCAGCCTGGAAGCTCCCCTGCCCTCTGCAGGTATCACAAACCAAACCAGCT	chr6	113471967	113472206		8
Inflammation_2	chr6	TXA0447272	IL17RC_t2_1	TTTTCTTCAGGGAAGGGCTTAGG	TCGCCTGGAAGTCATTCTTTTCA	175	51	TTTTCTTCAGGGAAGGGCTTAGGACAAGGAGCGCTGGAAGGAGATAGGCAGTGGCTAGGGGGCTGTCAAGCAAGGAAAGGCGCTTGAATTGAATTGACTTTTTCTTCCTTCCCAGGGCCTCTCCTGCCACCTCTGGGGTAAGTATTGCTACTTGAAAAGAATGACTTCCAGGCGA	chr6	113471956	113472130		5
Inflammation_2	chr6	TXA0447316	IL17RC_t18_9	AGACTCTGTGCCCTCCC	TCCCAGGTCCCATTCCTC	214	69	AGACTCTGTGCCCTCCCCGTTCCGCGTCGCCCCGCTCTTCTCCCTGCCCTCGCAGCTGCCGGCTTTCCTGGATGCACTGCAGGGAGGCTGCTCCACTTCCGCGGGGCGACCCGCGGACCGGGTGGAACGAGTGACCCAGGCGCTGCGGTCCGCCCTGGACAGCTGTACTTCTAGCTCGGAAGCCCCAGGCTGCTGCGAGGAATGGGACCTGGGA	chr6	113482885	113483098		3
Inflammation_2	IL17RC	TXA0447309	IL17RC_t18_8	CCGCTACGTCGGGGTCTA	GGGGCTTCCGAGCTAGAAGTA	225	70	CCGCTACGTCGGGGTCTACTTCGACGGGCTGCTGCACCCAGACTCTGTGCCCTCCCCGTTCCGCGTCGCCCCGCTCTTCTCCCTGCCCTCGCAGCTGCCGGCTTTCCTGGATGCACTGCAGGGAGGCTGCTCCACTTCCGCGGGGCGACCCGCGGACCGGGTGGAACGAGTGACCCAGGCGCTGCGGTCCGCCCTGGACAGCTGTACTTCTAGCTCGGAAGCCCC	chr6	113482846	113483070		5
Inflammation_2	chr6	TXA0491090	IL17RC_t18_7	GCAGCTCCAGACAGTGG	CTGCAGTGCATCCAGGAAAG	214	70	GCAGCTCCAGACAGTGGAGCCCGGGCCGCATGACGCCCTCGCCGCCTGGCTCAGCTGCGTGCTACCCGATTTCCTGCAAGGCCGGGCGACCGGCCGCTACGTCGGGGTCTACTTCGACGGGCTGCTGCACCCAGACTCTGTGCCCTCCCCGTTCCGCGTCGCCCCGCTCTTCTCCCTGCCCTCGCAGCTGCCGGCTTTCCTGGATGCACTGCAG	chr6	113482753	113482966	Assays designed by relax mode and have no off-target hits	6
Inflammation_2	IL17RC	TXA0447310	IL17RC_t18_6	TGGCGTGGTAATCCTTCTCTTCT	GACGCGGAACGGGGAG	217	69	TGGCGTGGTAATCCTTCTCTTCTCGCCCGCGGCCGTGGCGCAGTGTCAGCAGTGGCTGCAGCTCCAGACAGTGGAGCCCGGGCCGCATGACGCCCTCGCCGCCTGGCTCAGCTGCGTGCTACCCGATTTCCTGCAAGGCCGGGCGACCGGCCGCTACGTCGGGGTCTACTTCGACGGGCTGCTGCACCCAGACTCTGTGCCCTCCCCGTTCCGCGTC	chr6	113482696	113482912		7
Inflammation_2	chr6	TXA0447315	IL17RC_t18_5	CTAGCCTGGTTCCACCACCA	CCCGGCCTTGCAGGAAA	187	68	CTAGCCTGGTTCCACCACCAGCGACGCCGTATCCTGCAGGAGGGTGGCGTGGTAATCCTTCTCTTCTCGCCCGCGGCCGTGGCGCAGTGTCAGCAGTGGCTGCAGCTCCAGACAGTGGAGCCCGGGCCGCATGACGCCCTCGCCGCCTGGCTCAGCTGCGTGCTACCCGATTTCCTGCAAGGCCGGG	chr6	113482652	113482838		3
Inflammation_2	IL17RC	TXA0447306	IL17RC_t18_4	GGGCTACGAGCGTCTGG	GCTCCACTGTCTGGAGCTG	227	69	GGGCTACGAGCGTCTGGTGGGAGCACTGGCGTCCGCGTTGAGCCAGATGCCACTGCGCGTGGCCGTGGACCTGTGGAGCCGCCGCGAGCTGAGCGCGCACGGAGCCCTAGCCTGGTTCCACCACCAGCGACGCCGTATCCTGCAGGAGGGTGGCGTGGTAATCCTTCTCTTCTCGCCCGCGGCCGTGGCGCAGTGTCAGCAGTGGCTGCAGCTCCAGACAGTGGAGC	chr6	113482546	113482772		1
Inflammation_2	chr6	TXA0491091	IL17RC_t18_3	GCCTTGCTCCTCCACTC	TTACCACGCCACCCTC	190	70	GCCTTGCTCCTCCACTCCGCCGACGGAGCGGGCTACGAGCGTCTGGTGGGAGCACTGGCGTCCGCGTTGAGCCAGATGCCACTGCGCGTGGCCGTGGACCTGTGGAGCCGCCGCGAGCTGAGCGCGCACGGAGCCCTAGCCTGGTTCCACCACCAGCGACGCCGTATCCTGCAGGAGGGTGGCGTGGTAA	chr6	113482517	113482706	Assays designed by relax mode and have no off-target hits	2
Inflammation_2	chr6	TXA0447317	IL17RC_t18_2	CAGGTCCGGGCTCACC	CGGCTCCACAGGTCCAC	171	71	CAGGTCCGGGCTCACCCTCACAGGCTCCACTATCCCTGTAGCGGCCCGTGGCTCCCGCACGGCCTTGCTCCTCCACTCCGCCGACGGAGCGGGCTACGAGCGTCTGGTGGGAGCACTGGCGTCCGCGTTGAGCCAGATGCCACTGCGCGTGGCCGTGGACCTGTGGAGCCG	chr6	113482456	113482626		4
Inflammation_2	chr6	TXA0447314	IL17RC_t18_11	GAGGCTGCTCCACTTCC	TCCTCGGAACAGATACACG	204	61	GAGGCTGCTCCACTTCCGCGGGGCGACCCGCGGACCGGGTGGAACGAGTGACCCAGGCGCTGCGGTCCGCCCTGGACAGCTGTACTTCTAGCTCGGAAGCCCCAGGCTGCTGCGAGGAATGGGACCTGGGACCCTGCACTACACTAGAATAAAAGCCGATACAGTATTCCTAACCAAGTAGCACTCGTGTATCTGTTCCGAGGA	chr6	113482968	113483171		4
Inflammation_2	IL17RC	TXA0447307	IL17RC_t18_10	GCTCTTCTCCCTGCCCTCG	CACGAGTGCTACTTGGTTAGGAA	239	63	GCTCTTCTCCCTGCCCTCGCAGCTGCCGGCTTTCCTGGATGCACTGCAGGGAGGCTGCTCCACTTCCGCGGGGCGACCCGCGGACCGGGTGGAACGAGTGACCCAGGCGCTGCGGTCCGCCCTGGACAGCTGTACTTCTAGCTCGGAAGCCCCAGGCTGCTGCGAGGAATGGGACCTGGGACCCTGCACTACACTAGAATAAAAGCCGATACAGTATTCCTAACCAAGTAGCACTCGTG	chr6	113482918	113483156		8
Inflammation_2	IL17RC	TXA0447308	IL17RC_t18_1	CTCAATTGGGTGGAGGGAAGG	CTGGTGGTGGAACCAGGCTA	238	70	CTCAATTGGGTGGAGGGAAGGCAGGTCCGGGCTCACCCTCACAGGCTCCACTATCCCTGTAGCGGCCCGTGGCTCCCGCACGGCCTTGCTCCTCCACTCCGCCGACGGAGCGGGCTACGAGCGTCTGGTGGGAGCACTGGCGTCCGCGTTGAGCCAGATGCCACTGCGCGTGGCCGTGGACCTGTGGAGCCGCCGCGAGCTGAGCGCGCACGGAGCCCTAGCCTGGTTCCACCACCAG	chr6	113482435	113482672		7
Inflammation_2	chr6	TXA0447311	IL17RC_t17_2	AGATAAAGGTTTCTTACTAGCCCAT	TTTGAGACTGTCCTTGGGAAAC	185	50	AGATAAAGGTTTCTTACTAGCCCATTATTTTCCCCTGTCTATTCCAGACATCCACAGGCGCTGGGTCCTAGTATGGCTGGCCTGCCTACTCTTGGCTGCGGCGCTTTTCTTCTTCCTCCTTCTAAAAAAGGACCGCAGGAAAGGTGAGTGCTTTCCTGTCCTGGTTTCCCAAGGACAGTCTCAAA	chr6	113482236	113482420	Assays designed by relax mode and have no off-target hits	6
Inflammation_2	IL17RC	TXA0447305	IL17RC_t17_1	TTTTTTCTCCTCCGATAAGGTGG	CCCAGCGCCACTGTTTGA	227	50	TTTTTTCTCCTCCGATAAGGTGGAGTAAAAGATAAAGGTTTCTTACTAGCCCATTATTTTCCCCTGTCTATTCCAGACATCCACAGGCGCTGGGTCCTAGTATGGCTGGCCTGCCTACTCTTGGCTGCGGCGCTTTTCTTCTTCCTCCTTCTAAAAAAGGACCGCAGGAAAGGTGAGTGCTTTCCTGTCCTGGTTTCCCAAGGACAGTCTCAAACAGTGGCGCTGGG	chr6	113482207	113482433		5
Inflammation_2	chr6	TXA0447304	IL17RC_t16_2	CATCGCTGAGGCTAGGAATGTG	CTGCTGGCACACAAGAAGAACAG	178	53	CATCGCTGAGGCTAGGAATGTGAATAAGCTGGCCAGAAATGATTCGCCGTTGAACACCAAGCCAGGGACTGTGGTTGTGTCTTACAGCTGTGGAACGATGACAACATGGGATCGCTATGGGCCTGCCCCATGGACAAGTGTGAGTACGAGGGGAACTGTTCTTCTTGTGTGCCAGCAG	chr6	113481097	113481274		3
Inflammation_2	IL17RC	TXA0447302	IL17RC_t16_1	CAAGGAAGTATGCATCGCTGAGG	TCAGCACTGAGGTCCCTGTC	218	53	CAAGGAAGTATGCATCGCTGAGGCTAGGAATGTGAATAAGCTGGCCAGAAATGATTCGCCGTTGAACACCAAGCCAGGGACTGTGGTTGTGTCTTACAGCTGTGGAACGATGACAACATGGGATCGCTATGGGCCTGCCCCATGGACAAGTGTGAGTACGAGGGGAACTGTTCTTCTTGTGTGCCAGCAGCTGACTCTGACAGGGACCTCAGTGCTGA	chr6	113481085	113481302		1
Inflammation_2	IL17RC	TXA0447301	IL17RC_t15_2	GCTCTACTGCAGCACCTTACAT	GGCATGATATCGCCTACCCTTTA	217	58	GCTCTACTGCAGCACCTTACATGCTGCCCCGGGTGACAGCCCCTCCCACTCCTTTGCCTTGGCAGAGAGCTGCTCGCCTGGGAGAGGAGTTGCTGCAAGACTTCCGATCACACCAGTGTATGCAGGTGAGTTGGTGACAGAACTTGCCCTGGTGCCTGCGTGTGTCTGCTTGCTCTCTGACTAGCCTAGGTAGGTAAAGGGTAGGCGATATCATGCC	chr6	113480693	113480909		2
Inflammation_2	chr6	TXA0447303	IL17RC_t15_1	CTTGACAAACAGCCCTGCTCTAC	CAGGCACCAGGGCAAGTTC	174	59	CTTGACAAACAGCCCTGCTCTACTGCAGCACCTTACATGCTGCCCCGGGTGACAGCCCCTCCCACTCCTTTGCCTTGGCAGAGAGCTGCTCGCCTGGGAGAGGAGTTGCTGCAAGACTTCCGATCACACCAGTGTATGCAGGTGAGTTGGTGACAGAACTTGCCCTGGTGCCTG	chr6	113480677	113480850		7
Inflammation_2	chr6	TXA0447300	IL17RC_t14_2	AGCCCAAGTGGGTCTTAC	CGACGGTTCCTTCGTC	186	57	AGCCCAAGTGGGTCTTACTAGAGTGGCCTCTCCCTCCTCCCAGACTCCTTGGGGCCCTTCAAGGATGATATGCTGTTAGTGGAGATGAAAACCGGCCTCAACAACACATCAGTCTGTGCCTTGGAACCCAGTGGCTGTACACCACTGCCCAGCATGGCCTCCACGGTGAGGACGAAGGAACCGTCG	chr6	113480263	113480448		8
Inflammation_2	IL17RC	TXA0447298	IL17RC_t14_1	AGGAAGGCAAAGCCCAAGTG	TAAGAATATGAGGCCGTGCATGA	240	55	AGGAAGGCAAAGCCCAAGTGGGTCTTACTAGAGTGGCCTCTCCCTCCTCCCAGACTCCTTGGGGCCCTTCAAGGATGATATGCTGTTAGTGGAGATGAAAACCGGCCTCAACAACACATCAGTCTGTGCCTTGGAACCCAGTGGCTGTACACCACTGCCCAGCATGGCCTCCACGGTGAGGACGAAGGAACCGTCGCTAGATGCTTCCAGACGCATCTCATGCACGGCCTCATATTCTTA	chr6	113480253	113480492		4
Inflammation_2	chr6	TXA0447299	IL17RC_t13_2	CTTGCTTTTCCTAGCGCTCCTA	CTTTGCCTTCCTCCCATCCC	178	62	CTTGCTTTTCCTAGCGCTCCTAACTCTGGCTCCTTCTAAGCAGGTGAGCACCTGGGAGAAGGTTCAGCTGCAAGCGTGCTTGTGGGCTGGTGAGTGGGGCAGGGCCACTGCCATGGGGGGCACCTTGGAGGAGCTGCCTCCCGGGGGGTAAAGGTCGGGGGATGGGAGGAAGGCAAAG	chr6	113480087	113480264		5
Inflammation_2	IL17RC	TXA0447297	IL17RC_t13_1	CTGACCCTGGCTCTTGCTTTTC	GGCCACTCTAGTAAGACCCACTT	216	62	CTGACCCTGGCTCTTGCTTTTCCTAGCGCTCCTAACTCTGGCTCCTTCTAAGCAGGTGAGCACCTGGGAGAAGGTTCAGCTGCAAGCGTGCTTGTGGGCTGGTGAGTGGGGCAGGGCCACTGCCATGGGGGGCACCTTGGAGGAGCTGCCTCCCGGGGGGTAAAGGTCGGGGGATGGGAGGAAGGCAAAGCCCAAGTGGGTCTTACTAGAGTGGCC	chr6	113480075	113480290		6
Inflammation_2	chr6	TXA0447296	IL17RC_t12_2	TGTGAATGTAAGTGAGGTCAAAGGT	CCCGAAGCCCAATGCTGTC	171	53	TGTGAATGTAAGTGAGGTCAAAGGTTGGAGAGAGTGTGTGGGACGCCAGCGTTTCCCTTCACCTCACTCATTCCCTGTTTTCCACAGGAGCCACAAGATTTCCAGTTGGTGGCAGGCCACCCCAACCTCTGTGTCCAGGTCAGAACAGTAATGACAGCATTGGGCTTCGGG	chr6	113479164	113479334		7
Inflammation_2	IL17RC	TXA0447293	IL17RC_t12_1	AGAACGCCACTGTGAATGTAAGT	GGCTGTAGCTTGGGAAGGAG	219	56	AGAACGCCACTGTGAATGTAAGTGAGGTCAAAGGTTGGAGAGAGTGTGTGGGACGCCAGCGTTTCCCTTCACCTCACTCATTCCCTGTTTTCCACAGGAGCCACAAGATTTCCAGTTGGTGGCAGGCCACCCCAACCTCTGTGTCCAGGTCAGAACAGTAATGACAGCATTGGGCTTCGGGTGGGGCCCTGCACCGGTTCTCCTTCCCAAGCTACAGCC	chr6	113479154	113479372		2
Inflammation_2	chr6	TXA0447291	IL17RC_t11_4	TAGATGCGCCTTGCTGTC	CCACCAACTGGAAATCTTGTG	218	56	TAGATGCGCCTTGCTGTCTGCCGGGCAAGGTAACACTGTGCTGGCAGGCACCAGACCAGAGTCCCTGCCAGCCACTTGTGCCACCAGTGCCCCAGAAGAACGCCACTGTGAATGTAAGTGAGGTCAAAGGTTGGAGAGAGTGTGTGGGACGCCAGCGTTTCCCTTCACCTCACTCATTCCCTGTTTTCCACAGGAGCCACAAGATTTCCAGTTGGTGG	chr6	113479058	113479275		6
Inflammation_2	chr6	TXA0447295	IL17RC_t11_3	TGTCCCCAGGGGTATGGC	CGTCCCACACACTCTCTCCAA	172	59	TGTCCCCAGGGGTATGGCAGCTAGATGCGCCTTGCTGTCTGCCGGGCAAGGTAACACTGTGCTGGCAGGCACCAGACCAGAGTCCCTGCCAGCCACTTGTGCCACCAGTGCCCCAGAAGAACGCCACTGTGAATGTAAGTGAGGTCAAAGGTTGGAGAGAGTGTGTGGGACG	chr6	113479037	113479208		5
Inflammation_2	IL17RC	TXA0447292	IL17RC_t11_2	ATGGGAAGGTGGACGACTTATTG	ACTTACATTCACAGTGGCGTTCT	231	61	ATGGGAAGGTGGACGACTTATTGACCCTGGCCCTCCGCTGCAGATCCCGGTGCACACAGGAACCTCTGGCACATAGCCAGGCTGCGGGTACTGTCCCCAGGGGTATGGCAGCTAGATGCGCCTTGCTGTCTGCCGGGCAAGGTAACACTGTGCTGGCAGGCACCAGACCAGAGTCCCTGCCAGCCACTTGTGCCACCAGTGCCCCAGAAGAACGCCACTGTGAATGTAAGT	chr6	113478946	113479176		4
Inflammation_2	chr6	TXA0447294	IL17RC_t11_1	GAGCTAGTCTCCTAAGGCAGGG	CTGCCAGCACAGTGTTACCTT	184	61	GAGCTAGTCTCCTAAGGCAGGGGGTATGGGAAGGTGGACGACTTATTGACCCTGGCCCTCCGCTGCAGATCCCGGTGCACACAGGAACCTCTGGCACATAGCCAGGCTGCGGGTACTGTCCCCAGGGGTATGGCAGCTAGATGCGCCTTGCTGTCTGCCGGGCAAGGTAACACTGTGCTGGCAG	chr6	113478921	113479104		8
Inflammation_2	chr6	TXA0447290	IL17RC_t10_2	GTGAACCCCTCCTAGTACCCAG	ATACCCCCTGCCTTAGGAGACTA	183	56	GTGAACCCCTCCTAGTACCCAGCAGAGGGTCTGATGTGCAATCATGGATGGTTGGCCCGGTCAAGGTCACCTAGTAGGCTCTCTCTTTTCTTTTCCCAGGTGTGGTCGCTAGAGCCAGACTCTGAGAGGGTCGAATTCTGCCCCTTCCGGGAAGGTGAGCTAGTCTCCTAAGGCAGGGGGTAT	chr6	113478765	113478947		3
Inflammation_2	IL17RC	TXA0447289	IL17RC_t10_1	CGGTGAGCGCTTATGAAACCTG	CAATAAGTCGTCCACCTTCCCAT	231	55	CGGTGAGCGCTTATGAAACCTGCCTCAGTGAACCCCTCCTAGTACCCAGCAGAGGGTCTGATGTGCAATCATGGATGGTTGGCCCGGTCAAGGTCACCTAGTAGGCTCTCTCTTTTCTTTTCCCAGGTGTGGTCGCTAGAGCCAGACTCTGAGAGGGTCGAATTCTGCCCCTTCCGGGAAGGTGAGCTAGTCTCCTAAGGCAGGGGGTATGGGAAGGTGGACGACTTATTG	chr6	113478738	113478968		1
Inflammation_2	chr6	TXA0447256	IL17RC_t1_4	GTGTCCTGGTTCCTGCTGTC	CTGTGATGAGGCAGAGACTGAAC	166	57	GTGTCCTGGTTCCTGCTGTCCTTGGCACTGGGCCGAAACCCTGTGGTCGTCTCTCTGGAGAGACTGATGGAGCCTCAGGACACTGCACGCTGCTCTCTAGTGAGTCTGGGACTATGGGAGGCTGGGAAAGGCTCAGAGTTAGAGTTCAGTCTCTGCCTCATCACAG	chr6	113471689	113471854		3
Inflammation_2	IL17RC	TXA0447253	IL17RC_t1_3	GAAGATGCCTGTGTCCTGGTTC	CAGACAGGGCAGTTCTGATAGAG	223	57	GAAGATGCCTGTGTCCTGGTTCCTGCTGTCCTTGGCACTGGGCCGAAACCCTGTGGTCGTCTCTCTGGAGAGACTGATGGAGCCTCAGGACACTGCACGCTGCTCTCTAGTGAGTCTGGGACTATGGGAGGCTGGGAAAGGCTCAGAGTTAGAGTTCAGTCTCTGCCTCATCACAGCCCGAGTCTGGCTCCTGTCACTGCCTCTATCAGAACTGCCCTGTCTG	chr6	113471679	113471901		2
Inflammation_2	chr6	TXA0447255	IL17RC_t1_2	GGGCTGATTGTCAGCAGGG	CCCATAGTCCCAGACTCACTAGA	214	65	GGGCTGATTGTCAGCAGGGGCGAGGGGTCTGCCCCCCCTTGGGGGGGCAGGACGGGGCCTCAGGCCTGGGTGCTGTCCGGCACCTGGAAGATGCCTGTGTCCTGGTTCCTGCTGTCCTTGGCACTGGGCCGAAACCCTGTGGTCGTCTCTCTGGAGAGACTGATGGAGCCTCAGGACACTGCACGCTGCTCTCTAGTGAGTCTGGGACTATGGG	chr6	113471593	113471806		6
Inflammation_2	IL17RC	TXA0447254	IL17RC_t1_1	GAGGAATTCTAGCCCTTGCTCTC	CAGTGTCCTGAGGCTCCATC	217	65	GAGGAATTCTAGCCCTTGCTCTCTCCCAGGGACACGGGGCTGATTGTCAGCAGGGGCGAGGGGTCTGCCCCCCCTTGGGGGGGCAGGACGGGGCCTCAGGCCTGGGTGCTGTCCGGCACCTGGAAGATGCCTGTGTCCTGGTTCCTGCTGTCCTTGGCACTGGGCCGAAACCCTGTGGTCGTCTCTCTGGAGAGACTGATGGAGCCTCAGGACACTG	chr6	113471557	113471773		7
Inflammation_2	chr6	TXA0447234	IL17RA_t9_2	TGCTTCTTTTGCCATGAGGGTAT	ACACACACCAAGAACCACTCTTT	175	51	TGCTTCTTTTGCCATGAGGGTATGGGTTGGCATCTTCTTCACCTTTCTGCTCCCCCAGGTCCAGCCCTTCTTCAGCAGCTGCCTAAATGACTGTTTGAGACACGCTGTGACTGTGCCCTGCCCAGTAATCTCAAATACCACAGGTAGGAGAGAAAGAGTGGTTCTTGGTGTGTGT	chr6	120477338	120477512		2
Inflammation_2	IL17RA	TXA0447233	IL17RA_t9_1	TCTCGCTCACAGATTGCTTCTTT	CACAGTCAGAACTCCTCTCCAGT	229	52	TCTCGCTCACAGATTGCTTCTTTTGCCATGAGGGTATGGGTTGGCATCTTCTTCACCTTTCTGCTCCCCCAGGTCCAGCCCTTCTTCAGCAGCTGCCTAAATGACTGTTTGAGACACGCTGTGACTGTGCCCTGCCCAGTAATCTCAAATACCACAGGTAGGAGAGAAAGAGTGGTTCTTGGTGTGTGTGGGGTAAGGCACTGTCCACTGGAGAGGAGTTCTGACTGTG	chr6	120477324	120477552		6
Inflammation_2	chr6	TXA0447232	IL17RA_t8_2	CAGACACCACCAGGGTCTTACTC	CTGCCCATGCTCTCCCAC	169	56	CAGACACCACCAGGGTCTTACTCAGCTAGCTTCTTCCACCCCTCTCTCCAGCCCAGGCAAGAAGAATTCCATCAGCGAGCTAATGTCACATTCACTCTAAGCAAGTTTCACTGGTGCTGCCATCACCACGTGCAGGTGAGTCGGGAGAGCGGTGGGAGAGCATGGGCAG	chr6	120476839	120477007		3
Inflammation_2	IL17RA	TXA0447229	IL17RA_t8_1	CAGTTATAAGGGAGGCACTGGTC	TCCCTCTGAAGGAAGGAAGGC	237	56	CAGTTATAAGGGAGGCACTGGTCCACAGAGGGCCACTTTCCCAGCAGACACCACCAGGGTCTTACTCAGCTAGCTTCTTCCACCCCTCTCTCCAGCCCAGGCAAGAAGAATTCCATCAGCGAGCTAATGTCACATTCACTCTAAGCAAGTTTCACTGGTGCTGCCATCACCACGTGCAGGTGAGTCGGGAGAGCGGTGGGAGAGCATGGGCAGGTGGCCTTCCTTCCTTCAGAGGGA	chr6	120476795	120477031		1
Inflammation_2	chr6	TXA0447231	IL17RA_t7_4	CAGCATCTGCGAGTGGACTT	GAAGGTGAAGGATTTGAGAGGTA	181	45	CAGCATCTGCGAGTGGACTTCACCCTGTGGAATGAATCCACCCCCTACCAGGTCCTGCTGGAAAGTTTCTCCGACTCAGAGAACCACAGCTGCTTTGATGTCGTTAAACAAATATTTGCGGTACTTGTATTTCATACCCTTTCAGACATAGATTAAAATACCTCTCAAATCCTTCACCTTC	chr6	120475500	120475680		6
Inflammation_2	IL17RA	TXA0447227	IL17RA_t7_3	CATCACTGTGGAGACCTTGGACA	CTAGGACCAGTATGGAGGAAGGT	223	46	CATCACTGTGGAGACCTTGGACACACAGCATCTGCGAGTGGACTTCACCCTGTGGAATGAATCCACCCCCTACCAGGTCCTGCTGGAAAGTTTCTCCGACTCAGAGAACCACAGCTGCTTTGATGTCGTTAAACAAATATTTGCGGTACTTGTATTTCATACCCTTTCAGACATAGATTAAAATACCTCTCAAATCCTTCACCTTCCTCCATACTGGTCCTAG	chr6	120475475	120475697		5
Inflammation_2	chr6	TXA0447230	IL17RA_t7_2	CACACGTACCTCCCCTCACTTC	GAGTCGGAGAAACTTTCCAGCAG	169	57	CACACGTACCTCCCCTCACTTCCAACCTGCACTGTGCGCCCTTGGCAGGCAGCCTTTGGGATCCCAACATCACTGTGGAGACCTTGGACACACAGCATCTGCGAGTGGACTTCACCCTGTGGAATGAATCCACCCCCTACCAGGTCCTGCTGGAAAGTTTCTCCGACTC	chr6	120475408	120475576		1
Inflammation_2	IL17RA	TXA0447228	IL17RA_t7_1	TACTGGCCCATACACACATGC	CATCAAAGCAGCTGTGGTTCTCT	222	56	TACTGGCCCATACACACATGCCCACGTAGGCACACGTACCTCCCCTCACTTCCAACCTGCACTGTGCGCCCTTGGCAGGCAGCCTTTGGGATCCCAACATCACTGTGGAGACCTTGGACACACAGCATCTGCGAGTGGACTTCACCCTGTGGAATGAATCCACCCCCTACCAGGTCCTGCTGGAAAGTTTCTCCGACTCAGAGAACCACAGCTGCTTTGATG	chr6	120475378	120475599		3
Inflammation_2	IL17RA	TXA0447223	IL17RA_t6_2	ACGAACAAATTTCCTAAAGGCAGAG	CTACGTGGGCATGTGTGTATGG	236	47	ACGAACAAATTTCCTAAAGGCAGAGACTTACCAATTTCTCTCTTATTGGGGTCGGCAGACTGTGAGGACAGCAAGATGAAGATGACTACCTCATGCGTGAGCTCAGGTAACTGGCTGACCTAGGAGACCTTGACCTGGGCACTACTGTAACTCGCACTCAGTAACTTTAACTTGCACTTAGTAAAGTTGGGTATGTGTACAATTGTGTACTGGCCCATACACACATGCCCACGTAG	chr6	120475171	120475406		8
Inflammation_2	chr6	TXA0447224	IL17RA_t6_1	acaaaaGCACCAAAATCTGTACGAA	TTACAGTAGTGCCCAGGTCAAGG	170	46	acaaaaGCACCAAAATCTGTACGAACAAATTTCCTAAAGGCAGAGACTTACCAATTTCTCTCTTATTGGGGTCGGCAGACTGTGAGGACAGCAAGATGAAGATGACTACCTCATGCGTGAGCTCAGGTAACTGGCTGACCTAGGAGACCTTGACCTGGGCACTACTGTAA	chr6	120475151	120475320	One primer sits in the repeat region	2
Inflammation_2	IL17RA	TXA0447222	IL17RA_t5_2	GGAGGGCGTTGTATGACCATC	GCTTCACCCAGAGCCCAGTA	216	55	GGAGGGCGTTGTATGACCATCCCATTGCCTCTCTTCCTCAGTGGCGGTTTTCCTTCAGCCACTTTGTGGTAGATCCTGGCCAGGAGTATGAAGTGACTGTTCACCACCTGCCGAAGCCCATCCCTGATGGGGACCCAAACCACAAATCCAAGATCATCTTTGTGCCTGGTAAGTGCCCTTCCAAGCAGCCACTTGGTACTGGGCTCTGGGTGAAGC	chr6	120474249	120474464		4
Inflammation_2	chr6	TXA0490644	IL17RA_t5_1	TGACATTGGGACTTGGTACAC	AGTGGCTGCTTGGAAGG	220	54	TGACATTGGGACTTGGTACACAGTGGCGGAGGGCGTTGTATGACCATCCCATTGCCTCTCTTCCTCAGTGGCGGTTTTCCTTCAGCCACTTTGTGGTAGATCCTGGCCAGGAGTATGAAGTGACTGTTCACCACCTGCCGAAGCCCATCCCTGATGGGGACCCAAACCACAAATCCAAGATCATCTTTGTGCCTGGTAAGTGCCCTTCCAAGCAGCCACT	chr6	120474222	120474441	Assays designed by relax mode and have no off-target hits	7
Inflammation_2	chr6	TXA0447221	IL17RA_t4_2	GGGTTGGTCTGCATCTGTGTC	GGACAAGAAGCCTGTACTGGTG	216	56	GGGTTGGTCTGCATCTGTGTCCCCTTTCCTTCCTGGCCTGCAGCCAGCATCCTGTACCTCGAGGGTGCAGAGCTGTCCGTCCTGCAGCTGAACACCAATGAGCGGCTGTGTGTCAAGTTCCAGTTTCTGTCCATGCTGCAGCATCACCGTAAGCGGGTAAGATGACAGCCTCACTGCACTGTGTTCCTAAGTGACACCAGTACAGGCTTCTTGTCC	chr6	120473711	120473926		5
Inflammation_2	IL17RA	TXA0447218	IL17RA_t4_1	GTTAGGTAACAGGGCAGATGGG	TGTCACTTAGGAACACAGTGCAG	239	56	GTTAGGTAACAGGGCAGATGGGGAAGAGACACACCCTGGCAGGGGGTTGGTCTGCATCTGTGTCCCCTTTCCTTCCTGGCCTGCAGCCAGCATCCTGTACCTCGAGGGTGCAGAGCTGTCCGTCCTGCAGCTGAACACCAATGAGCGGCTGTGTGTCAAGTTCCAGTTTCTGTCCATGCTGCAGCATCACCGTAAGCGGGTAAGATGACAGCCTCACTGCACTGTGTTCCTAAGTGACA	chr6	120473668	120473906		3
Inflammation_2	chr6	TXA0447220	IL17RA_t3_3	GGATCCACCCCAAAAACCTGAC	AACAGAAGCAGCAGTGGTCTC	190	53	GGATCCACCCCAAAAACCTGACCCCGTCTTCCCCAAAAAACATCTATATCAATCTTAGTGTTTCCTCTACCCAGCACGGAGAATTAGTCCCTGTGTTGCATGTTGAGTGGACCCTGCAGACAGATGGTGAGTGGCCACATCTGCCAGCGCCTGGGTTTGCCCTTGGGAGGAGACCACTGCTGCTTCTGTT	chr6	120472947	120473136		4
Inflammation_2	IL17RA	TXA0447217	IL17RA_t3_2	AGCAGATCTTAGGGTCTTGACTG	CCAGGCGCTGGCAGATG	226	50	AGCAGATCTTAGGGTCTTGACTGCAGGTCTGATAGTTGTTCTCCTCAACAGGTACTTGTCTGGATGACAGCTGGATCCACCCCAAAAACCTGACCCCGTCTTCCCCAAAAAACATCTATATCAATCTTAGTGTTTCCTCTACCCAGCACGGAGAATTAGTCCCTGTGTTGCATGTTGAGTGGACCCTGCAGACAGATGGTGAGTGGCCACATCTGCCAGCGCCTGG	chr6	120472875	120473100		2
Inflammation_2	chr6	TXA0447219	IL17RA_t3_1	GTCTCTGGACCCTCTAAGCAGAT	GACTAATTCTCCGTGCTGGGTAG	177	47	GTCTCTGGACCCTCTAAGCAGATCTTAGGGTCTTGACTGCAGGTCTGATAGTTGTTCTCCTCAACAGGTACTTGTCTGGATGACAGCTGGATCCACCCCAAAAACCTGACCCCGTCTTCCCCAAAAAACATCTATATCAATCTTAGTGTTTCCTCTACCCAGCACGGAGAATTAGTC	chr6	120472859	120473035		8
Inflammation_2	chr6	TXA0447216	IL17RA_t2_2	TGTGTGAACCGCTCTCAGG	GGGAGGCCCTCACTGTATTAACT	174	54	TGTGTGAACCGCTCTCAGGGGCCTGCCAGGCAGCGGGGCCACTGGGAGCCTGGCCCTTCTCATCGGTAATCAACACTTCCTTTCTTCCCACAGGGGCTGAGCTGCAGAGTCAAGAATAGTAAGTCCTCTTTTTTGTTTCACTTATTGCCTCAGTTAATACAGTGAGGGCCTCCC	chr6	120471999	120472172		1
Inflammation_2	IL17RA	TXA0447215	IL17RA_t2_1	GACAGGGACTGTGTGAACCG	CAGAGCTCAGCCCACAGG	222	56	GACAGGGACTGTGTGAACCGCTCTCAGGGGCCTGCCAGGCAGCGGGGCCACTGGGAGCCTGGCCCTTCTCATCGGTAATCAACACTTCCTTTCTTCCCACAGGGGCTGAGCTGCAGAGTCAAGAATAGTAAGTCCTCTTTTTTGTTTCACTTATTGCCTCAGTTAATACAGTGAGGGCCTCCCACTGACTTCACAGGGCAGCCTCCTGTGGGCTGAGCTCTG	chr6	120471990	120472211		6
Inflammation_2	chr6	TXA0491089	IL17RA_t13_9	CACCTACGTTGTTTGCTACTTC	CTGTGAGCTCTCTGACATGG	173	53	CACCTACGTTGTTTGCTACTTCAGTGGCATCTGTAGTGAGAGGGATGTCCCCGACCTCTTCAACATCACCTCCAGGTACCCACTCATGGACAGATTTGAGGAGGTTTACTTCCGGATCCAGGACCTGGAGATGTTTGAACCCGGCCGGATGCACCATGTCAGAGAGCTCACAG	chr6	120481389	120481561		7
Inflammation_2	chr6	TXA0447243	IL17RA_t13_8	ATGAACATGATCCTGCCAGACTT	CAGGTAATTGTCCCCTGTGAG	231	53	ATGAACATGATCCTGCCAGACTTCAAGAGGCCAGCCTGCTTCGGCACCTACGTTGTTTGCTACTTCAGTGGCATCTGTAGTGAGAGGGATGTCCCCGACCTCTTCAACATCACCTCCAGGTACCCACTCATGGACAGATTTGAGGAGGTTTACTTCCGGATCCAGGACCTGGAGATGTTTGAACCCGGCCGGATGCACCATGTCAGAGAGCTCACAGGGGACAATTACCTG	chr6	120481345	120481575		2
Inflammation_2	chr6	TXA0447259	IL17RA_t13_7	GCTGAGCCTGCTGTCC	GGAGGTGATGTTGAAGAGGTC	183	56	GCTGAGCCTGCTGTCCAGCTACGGTGTGACCACTGGAAGCCTGCTGGGGACCTTTTCACTGCAGCCATGAACATGATCCTGCCAGACTTCAAGAGGCCAGCCTGCTTCGGCACCTACGTTGTTTGCTACTTCAGTGGCATCTGTAGTGAGAGGGATGTCCCCGACCTCTTCAACATCACCTCC	chr6	120481279	120481461		8
Inflammation_2	chr6	TXA0447252	IL17RA_t13_6	CAAAATCATCATCCTGTGTTCCC	ACATCCCTCTCACTACAGATG	219	54	CAAAATCATCATCCTGTGTTCCCGAGGCACCCAAGCAAAGTGGAAAGCTATCTTGGGTTGGGCTGAGCCTGCTGTCCAGCTACGGTGTGACCACTGGAAGCCTGCTGGGGACCTTTTCACTGCAGCCATGAACATGATCCTGCCAGACTTCAAGAGGCCAGCCTGCTTCGGCACCTACGTTGTTTGCTACTTCAGTGGCATCTGTAGTGAGAGGGATGT	chr6	120481218	120481436		3
Inflammation_2	chr6	TXA0447263	IL17RA_t13_5	GCAGGTTATCTCTGAGGTGG	GGTCCCCAGCAGGCTT	185	57	GCAGGTTATCTCTGAGGTGGGGGTCATGACCTGGGTGAGCCGACAGAAGCAGGAGATGGTGGAGAGCAACTCCAAAATCATCATCCTGTGTTCCCGAGGCACCCAAGCAAAGTGGAAAGCTATCTTGGGTTGGGCTGAGCCTGCTGTCCAGCTACGGTGTGACCACTGGAAGCCTGCTGGGGACC	chr6	120481146	120481330		5
Inflammation_2	chr6	TXA0447247	IL17RA_t13_4	CTATGTGGAGGTGGTCCTAAAG	GCTCAGCCCAACCCAAG	221	55	CTATGTGGAGGTGGTCCTAAAGTTCGCCCAGTTCCTGATCACTGCCTGTGGCACTGAAGTAGCCCTTGACCTCCTGGAAGAGCAGGTTATCTCTGAGGTGGGGGTCATGACCTGGGTGAGCCGACAGAAGCAGGAGATGGTGGAGAGCAACTCCAAAATCATCATCCTGTGTTCCCGAGGCACCCAAGCAAAGTGGAAAGCTATCTTGGGTTGGGCTGAGC	chr6	120481065	120481285		7
Inflammation_2	chr6	TXA0447258	IL17RA_t13_3	GACCACCCCCTCTATGTG	ATTTTGGAGTTGCTCTCCACC	170	56	GACCACCCCCTCTATGTGGAGGTGGTCCTAAAGTTCGCCCAGTTCCTGATCACTGCCTGTGGCACTGAAGTAGCCCTTGACCTCCTGGAAGAGCAGGTTATCTCTGAGGTGGGGGTCATGACCTGGGTGAGCCGACAGAAGCAGGAGATGGTGGAGAGCAACTCCAAAAT	chr6	120481054	120481223		1
Inflammation_2	chr6	TXA0447264	IL17RA_t13_24	TCTCTCTCTCCTGAGGAACTAC	CCCTCTTAAGTAGCAGGCTC	162	58	TCTCTCTCTCCTGAGGAACTACGGAGCCTGAGGAAGCTCCAGAGGCAGCTTTTCTTCTGGGAGCTCGAGAAGAACCCTGGCTGGAACAGCTTGGAGCCACGGAGACCCACCCCAGAAGAGCAGAATCCCTCCTAGGCCTCCTGAGCCTGCTACTTAAGAGGG	chr6	120482350	120482511		5
Inflammation_2	chr6	TXA0447244	IL17RA_t13_23	CACGGAGGAGGAAGAGCTA	cgcacacacaGAGTACAA	226	57	CACGGAGGAGGAAGAGCTAGAACTGGGTGAGCCCGTTGAGTCTCTCTCTCCTGAGGAACTACGGAGCCTGAGGAAGCTCCAGAGGCAGCTTTTCTTCTGGGAGCTCGAGAAGAACCCTGGCTGGAACAGCTTGGAGCCACGGAGACCCACCCCAGAAGAGCAGAATCCCTCCTAGGCCTCCTGAGCCTGCTACTTAAGAGGGTGTATATTGTACTCtgtgtgtgcg	chr6	120482310	120482535	One primer sits in the repeat region	7
Inflammation_2	chr6	TXA0447267	IL17RA_t13_22	GGGCTGCACACCCTCTG	GTTCCAGCCAGGGTTCTTCTC	220	63	GGGCTGCACACCCTCTGAGGAGGAGCAGCGGCAGTCGGTGCAGTCGGACCAGGGCTACATCTCCAGGAGCTCCCCGCAGCCCCCCGAGTGGCTCACGGAGGAGGAAGAGCTAGAACTGGGTGAGCCCGTTGAGTCTCTCTCTCCTGAGGAACTACGGAGCCTGAGGAAGCTCCAGAGGCAGCTTTTCTTCTGGGAGCTCGAGAAGAACCCTGGCTGGAAC	chr6	120482217	120482436		3
Inflammation_2	IL17RA	TXA0447242	IL17RA_t13_21	GAGTGGACAGCCCCTGGA	CAGAAGAAAAGCTGCCTCTGGA	240	64	GAGTGGACAGCCCCTGGAGAGCTGGCCGAGGCCAGAGGTGGTCCTCGAGGGCTGCACACCCTCTGAGGAGGAGCAGCGGCAGTCGGTGCAGTCGGACCAGGGCTACATCTCCAGGAGCTCCCCGCAGCCCCCCGAGTGGCTCACGGAGGAGGAAGAGCTAGAACTGGGTGAGCCCGTTGAGTCTCTCTCTCCTGAGGAACTACGGAGCCTGAGGAAGCTCCAGAGGCAGCTTTTCTTCTG	chr6	120482169	120482408		6
Inflammation_2	chr6	TXA0447261	IL17RA_t13_20	CACCTCCAAGGCGATGCAA	CCTGGAGATGTAGCCCTGGT	180	64	CACCTCCAAGGCGATGCAAGAGAGCAGCTAGAAAGCCTAATGCTCTCGGTGCTGCAGCAGAGCCTGAGTGGACAGCCCCTGGAGAGCTGGCCGAGGCCAGAGGTGGTCCTCGAGGGCTGCACACCCTCTGAGGAGGAGCAGCGGCAGTCGGTGCAGTCGGACCAGGGCTACATCTCCAGG	chr6	120482104	120482283		2
Inflammation_2	IL17RA	TXA0447246	IL17RA_t13_2	CAGTCCTTGGCATGAGGATCAG	CATGACCCCCACCTCAGAGATAA	237	58	CAGTCCTTGGCATGAGGATCAGCACACGTTTCTTTGTCTCTTCCAGGCATCTTGCCCGTAGCAGACCTGACTCCCCCACCCCTGAGGCCCAGGAAGGTCTGGATCGTCTACTCGGCCGACCACCCCCTCTATGTGGAGGTGGTCCTAAAGTTCGCCCAGTTCCTGATCACTGCCTGTGGCACTGAAGTAGCCCTTGACCTCCTGGAAGAGCAGGTTATCTCTGAGGTGGGGGTCATG	chr6	120480937	120481173		6
Inflammation_2	IL17RA	TXA0447251	IL17RA_t13_19	GGTCCAGAGGAACAGCATCCTT	CTCCTCCTCAGAGGGTGTGC	220	60	GGTCCAGAGGAACAGCATCCTTTGCCTCCCCGTGGACTCAGATGACTTGCCACTCTGTAGCACCCCAATGATGTCACCTGACCACCTCCAAGGCGATGCAAGAGAGCAGCTAGAAAGCCTAATGCTCTCGGTGCTGCAGCAGAGCCTGAGTGGACAGCCCCTGGAGAGCTGGCCGAGGCCAGAGGTGGTCCTCGAGGGCTGCACACCCTCTGAGGAGGAG	chr6	120482022	120482241		4
Inflammation_2	chr6	TXA0447260	IL17RA_t13_18	GCCCATGACAGAGGACAGC	CTGCAGCACCGAGAGCATTAG	178	59	GCCCATGACAGAGGACAGCGAGGCTTGCCCGCTGCTGGGGGTCCAGAGGAACAGCATCCTTTGCCTCCCCGTGGACTCAGATGACTTGCCACTCTGTAGCACCCCAATGATGTCACCTGACCACCTCCAAGGCGATGCAAGAGAGCAGCTAGAAAGCCTAATGCTCTCGGTGCTGCAG	chr6	120481983	120482160		1
Inflammation_2	IL17RA	TXA0447248	IL17RA_t13_17	GGCCACAGAGAGAGCTAGTGG	GTGACATCATTGGGGTGCTACAG	240	62	GGCCACAGAGAGAGCTAGTGGCTCACACCCTCCAAAGCATGGTGCTGCCAGCAGAGCAGGTCCCTGCAGCTCATGTGGTGGAGCCTCTCCATCTCCCAGACGGCAGTGGAGCAGCTGCCCAGCTGCCCATGACAGAGGACAGCGAGGCTTGCCCGCTGCTGGGGGTCCAGAGGAACAGCATCCTTTGCCTCCCCGTGGACTCAGATGACTTGCCACTCTGTAGCACCCCAATGATGTCAC	chr6	120481859	120482098		6
Inflammation_2	chr6	TXA0447269	IL17RA_t13_16	AGCTGGACCCTCAGCTATG	GAGTCCACGGGGAGGCAA	220	63	AGCTGGACCCTCAGCTATGGCCACAGAGAGAGCTAGTGGCTCACACCCTCCAAAGCATGGTGCTGCCAGCAGAGCAGGTCCCTGCAGCTCATGTGGTGGAGCCTCTCCATCTCCCAGACGGCAGTGGAGCAGCTGCCCAGCTGCCCATGACAGAGGACAGCGAGGCTTGCCCGCTGCTGGGGGTCCAGAGGAACAGCATCCTTTGCCTCCCCGTGGACTC	chr6	120481841	120482060		8
Inflammation_2	chr6	TXA0447266	IL17RA_t13_15	GGGAGGAATTGTCAAACAGCAG	GTCTGGGAGATGGAGAGGC	220	57	GGGAGGAATTGTCAAACAGCAGCCCCTGGTGCGGGAACTCCCATCTGACGGCTGCCTTGTGGTAGATGTCTGTGTCAGTGAGGAAGAAAGTAGAATGGCAAAGCTGGACCCTCAGCTATGGCCACAGAGAGAGCTAGTGGCTCACACCCTCCAAAGCATGGTGCTGCCAGCAGAGCAGGTCCCTGCAGCTCATGTGGTGGAGCCTCTCCATCTCCCAGAC	chr6	120481740	120481959		5
Inflammation_2	chr6	TXA0447245	IL17RA_t13_14	CCTGGATGAAGAAGTGTTTGAAG	CACATGAGCTGCAGGGAC	238	56	CCTGGATGAAGAAGTGTTTGAAGACCCACTGCTGCCACCAGGGGGAGGAATTGTCAAACAGCAGCCCCTGGTGCGGGAACTCCCATCTGACGGCTGCCTTGTGGTAGATGTCTGTGTCAGTGAGGAAGAAAGTAGAATGGCAAAGCTGGACCCTCAGCTATGGCCACAGAGAGAGCTAGTGGCTCACACCCTCCAAAGCATGGTGCTGCCAGCAGAGCAGGTCCCTGCAGCTCATGTG	chr6	120481698	120481935		7
Inflammation_2	chr6	TXA0447268	IL17RA_t13_13	CTTAGGTTCCAGGAGTGGCAAA	AGCCGTCAGATGGGAGTT	181	57	CTTAGGTTCCAGGAGTGGCAAACCCAGTGCCCCGACTGGTTCGAGCGTGAGAACCTCTGCTTAGCTGATGGCCAAGATCTTCCCTCCCTGGATGAAGAAGTGTTTGAAGACCCACTGCTGCCACCAGGGGGAGGAATTGTCAAACAGCAGCCCCTGGTGCGGGAACTCCCATCTGACGGCT	chr6	120481612	120481792		3
Inflammation_2	chr6	TXA0447249	IL17RA_t13_12	AAGGAGGCTGTGCTTAGGTTC	TCTACTTTCTTCCTCACTGACAC	234	56	AAGGAGGCTGTGCTTAGGTTCCAGGAGTGGCAAACCCAGTGCCCCGACTGGTTCGAGCGTGAGAACCTCTGCTTAGCTGATGGCCAAGATCTTCCCTCCCTGGATGAAGAAGTGTTTGAAGACCCACTGCTGCCACCAGGGGGAGGAATTGTCAAACAGCAGCCCCTGGTGCGGGAACTCCCATCTGACGGCTGCCTTGTGGTAGATGTCTGTGTCAGTGAGGAAGAAAGTAGA	chr6	120481600	120481833		2
Inflammation_2	chr6	TXA0491088	IL17RA_t13_11	GGACAGATTTGAGGAGGTTTACT	TTCTCACGCTCGAACCAGTC	189	58	GGACAGATTTGAGGAGGTTTACTTCCGGATCCAGGACCTGGAGATGTTTGAACCCGGCCGGATGCACCATGTCAGAGAGCTCACAGGGGACAATTACCTGCAGAGCCCTAGTGGCCGGCAGCTCAAGGAGGCTGTGCTTAGGTTCCAGGAGTGGCAAACCCAGTGCCCCGACTGGTTCGAGCGTGAGAA	chr6	120481476	120481664		6
Inflammation_2	chr6	TXA0447250	IL17RA_t13_10	GTACCCACTCATGGACAGATTT	ATCAGCTAAGCAGAGGTTCTCA	217	57	GTACCCACTCATGGACAGATTTGAGGAGGTTTACTTCCGGATCCAGGACCTGGAGATGTTTGAACCCGGCCGGATGCACCATGTCAGAGAGCTCACAGGGGACAATTACCTGCAGAGCCCTAGTGGCCGGCAGCTCAAGGAGGCTGTGCTTAGGTTCCAGGAGTGGCAAACCCAGTGCCCCGACTGGTTCGAGCGTGAGAACCTCTGCTTAGCTGAT	chr6	120481464	120481680		4
Inflammation_2	chr6	TXA0447265	IL17RA_t13_1	ATGCCCAGGTCCAGTCCTT	CCACAGGCAGTGATCAGGAAC	190	59	ATGCCCAGGTCCAGTCCTTGGCATGAGGATCAGCACACGTTTCTTTGTCTCTTCCAGGCATCTTGCCCGTAGCAGACCTGACTCCCCCACCCCTGAGGCCCAGGAAGGTCTGGATCGTCTACTCGGCCGACCACCCCCTCTATGTGGAGGTGGTCCTAAAGTTCGCCCAGTTCCTGATCACTGCCTGTGG	chr6	120480926	120481115		4
Inflammation_2	chr6	TXA0447241	IL17RA_t12_2	TTCTCTTTGGAATAAGCCGCTCC	GGAGTTTGACCAGAGACACAACA	179	49	TTCTCTTTGGAATAAGCCGCTCCATAGATTTCTTTTCCTTGCAGGCGCCGATCAAGAGAAACATGGTGATGACTCCAAAATCAATGGTCAGTAGCGCATGCTCTGTGGGGTCTGCCTGCTTTCTGAAGCCTGCTGGGTTCCTGGGGTAGATAGATCTGTTGTGTCTCTGGTCAAACTCC	chr6	120479959	120480137		8
Inflammation_2	IL17RA	TXA0447240	IL17RA_t12_1	TGAGCCCTTCAGTTGTTGTTTCT	CTACGTAAGGATAGGGCCTTCTG	231	49	TGAGCCCTTCAGTTGTTGTTTCTCTTTGGAATAAGCCGCTCCATAGATTTCTTTTCCTTGCAGGCGCCGATCAAGAGAAACATGGTGATGACTCCAAAATCAATGGTCAGTAGCGCATGCTCTGTGGGGTCTGCCTGCTTTCTGAAGCCTGCTGGGTTCCTGGGGTAGATAGATCTGTTGTGTCTCTGGTCAAACTCCTGAGTCCTTTCAGAAGGCCCTATCCTTACGTAG	chr6	120479940	120480170		5
Inflammation_2	chr6	TXA0490645	IL17RA_t11_2	CTGGGCTGGGGGTGTG	GGGAACGGGGAAGCAAC	188	57	CTGGGCTGGGGGTGTGGGGCCCCTGCCCAGACTCACTGTGCTCTGTTAGTTGCAGACTACATTCCCCTGTGGGTGTATGGCCTCATCACACTCATCGCCATTCTGCTGGTGGGATCTGTCATCGTGCTGATCATCTGTATGACCTGGAGGCTTTCTGGTAAGGACTACGCCgttgcttccccgttccc	chr6	120478326	120478513	One primer sits in the repeat region	1
Inflammation_2	IL17RA	TXA0447237	IL17RA_t11_1	GTACAAGCCATAGCTGACAGGG	TGCCACTTTGCCAGAGAGAAG	237	57	GTACAAGCCATAGCTGACAGGGCCTGGGCTGGGGGTGTGGGGCCCCTGCCCAGACTCACTGTGCTCTGTTAGTTGCAGACTACATTCCCCTGTGGGTGTATGGCCTCATCACACTCATCGCCATTCTGCTGGTGGGATCTGTCATCGTGCTGATCATCTGTATGACCTGGAGGCTTTCTGGTAAGGACTACGCCgttgcttccccgttccctcaggcttctctctggcaaagtggca	chr6	120478303	120478539	One primer sits in the repeat region	5
Inflammation_2	chr6	TXA0447236	IL17RA_t10_2	TGTGACTGGCTTAGATGATTGCT	GATGCAGTATGCCTTCTGGGATG	171	49	TGTGACTGGCTTAGATGATTGCTCATCATTAAGACTAACCCTGTCCCTGTTTCCTTTTGTTCTATTACAGTTCCCAAGCCAGGTAAGTCCTTTCTTCAGTCAAGGTCATTCCCAAGGGACCACATGAGGTCCCAGCTGATCCCTGGGCCATCCCAGAAGGCATACTGCATC	chr6	120478094	120478264		7
Inflammation_2	IL17RA	TXA0447235	IL17RA_t10_1	GGGCATCTCTGATAGGTTAAGGC	CTGATGATGTCACCCTCTGGCTA	237	50	GGGCATCTCTGATAGGTTAAGGCCATTGCTGGGCATTTGTGACTGGCTTAGATGATTGCTCATCATTAAGACTAACCCTGTCCCTGTTTCCTTTTGTTCTATTACAGTTCCCAAGCCAGGTAAGTCCTTTCTTCAGTCAAGGTCATTCCCAAGGGACCACATGAGGTCCCAGCTGATCCCTGGGCCATCCCAGAAGGCATACTGCATCCACAGCTAGCCAGAGGGTGACATCATCAG	chr6	120478057	120478293		4
Inflammation_2	IL17RA	TXA0491122	IL17RA_t1_2	CGGGCCGAGGGCTATG	CTCTGACACCTCTTCACCACC	236	74	CGGGCCGAGGGCTATGGCGATTCGGCGCTGCTGGCCACGGGTCGTCCCCGGGCCCGCGCTGGGATGGCTGCTTCTGCTGCTGAACGTTCTGGCCCCGGGCCGCGCCTCCCCGCGCCTCCTCGACTTCCCGGCTCCGGTCTGCGCGCAGGAGGTGAGAGAAGCCGGGCGGAGCGGGGATGCCCGGGCCGTCGGGGGTGGTGGAGAGGACGGCGGAGGGTGGTGAAGAGGTGTCAGAG	chr6	120463316	120463551		7
Inflammation_2	IL17RA	TXA0491123	IL17RA_t1_1	CAGAGGAGGCCGTGTGAAG	GAGCCGGGAAGTCGAGGA	234	75	CAGAGGAGGCCGTGTGAAGCCGACGAGCGCCAGTCCTCGGCCGGGAAAGCCATCGCGGGCCCTCGCTGTCGCGCGGAGCCAGCTGCGAGCGCTCCGCGACCGGGCCGAGGGCTATGGCGATTCGGCGCTGCTGGCCACGGGTCGTCCCCGGGCCCGCGCTGGGATGGCTGCTTCTGCTGCTGAACGTTCTGGCCCCGGGCCGCGCCTCCCCGCGCCTCCTCGACTTCCCGGCTC	chr6	120463216	120463449		8
Inflammation_2	ETV6	TXA0447580	ETV6_t8_4	TGCTGGATGAACAAACGTACCAA	CAGAACTTCAGCCCTGCCATT	230	59	TGCTGGATGAACAAACGTACCAAGAGGATGAACCTACCATAGCCTCACCGGTGGGCTGGCCAAGAGGAAACCTGCCCACGGGGACCGCAGGAGGCGTGATGGAAGCAGGCGAGCTAGGGGTGGCTGTAAAGGAAGAGACCCGGGAATAGCAGGGACACTTCTCCTGCCGATCAAGAGGGACCCAGAGCACCTTAGACAAGCCACCGAGCAATGGCAGGGCTGAAGTTCTG	chr6	134266326	134266555		3
Inflammation_2	chr6	TXA0447582	ETV6_t8_3	CCGGACAGACCGTCTAGAACA	CTGGGTCCCTCTTGATCGG	220	59	CCGGACAGACCGTCTAGAACACCTCGAGTCTCAAGTGCTGGATGAACAAACGTACCAAGAGGATGAACCTACCATAGCCTCACCGGTGGGCTGGCCAAGAGGAAACCTGCCCACGGGGACCGCAGGAGGCGTGATGGAAGCAGGCGAGCTAGGGGTGGCTGTAAAGGAAGAGACCCGGGAATAGCAGGGACACTTCTCCTGCCGATCAAGAGGGACCCAG	chr6	134266291	134266510		6
Inflammation_2	chr6	TXA0447583	ETV6_t8_2	TAAAGAGAGTGGAGGGACATCTT	CTATGGTAGGTTCATCCTCTTGG	177	47	TAAAGAGAGTGGAGGGACATCTTTGGGGACACAGATTCTTTTGACTCTTTCATTTCCTGCTCCAAAGGTTCATGAAAACCCCAGATGAGATCATGAGTGGCCGGACAGACCGTCTAGAACACCTCGAGTCTCAAGTGCTGGATGAACAAACGTACCAAGAGGATGAACCTACCATAG	chr6	134266191	134266367		7
Inflammation_2	ETV6	TXA0447581	ETV6_t8_1	GTTGCTCTAAGGGTTGGGGTAAA	GTGGGCAGGTTTCCTCTTGG	233	51	GTTGCTCTAAGGGTTGGGGTAAAGAGAGTGGAGGGACATCTTTGGGGACACAGATTCTTTTGACTCTTTCATTTCCTGCTCCAAAGGTTCATGAAAACCCCAGATGAGATCATGAGTGGCCGGACAGACCGTCTAGAACACCTCGAGTCTCAAGTGCTGGATGAACAAACGTACCAAGAGGATGAACCTACCATAGCCTCACCGGTGGGCTGGCCAAGAGGAAACCTGCCCAC	chr6	134266172	134266404		2
Inflammation_2	chr6	TXA0447579	ETV6_t7_2	TTTCATTGTGTATTTGTGCTTTTT	TCTGTAAAGAAAATAATGTCCTCCC	220	41	TTTCATTGTGTATTTGTGCTTTTTTTTTCCTCTCTCTCTCCCTTCCTCCTTTGAACAAACAGAACAGAACAAACATGACCTATGAGAAAATGTCCAGAGCCCTGCGCCACTACTACAAACTAAACATTATCAGGAAGGAGCCCGGACAAAGGCTTTTGTTCAGGTAGCACTTCCTCTTTTCCCTTTCCTTCTTTTGGGAGGACATTATTTTCTTTACAGA	chr6	134262957	134263176		1
Inflammation_2	ETV6	TXA0447578	ETV6_t7_1	TTTTAATAGCTGCCTGGTGCCTT	CCTCCCAAAAGAAGGAAAGGGAAA	236	42	TTTTAATAGCTGCCTGGTGCCTTTTCTGAAGTTCATTTCATTGTGTATTTGTGCTTTTTTTTTCCTCTCTCTCTCCCTTCCTCCTTTGAACAAACAGAACAGAACAAACATGACCTATGAGAAAATGTCCAGAGCCCTGCGCCACTACTACAAACTAAACATTATCAGGAAGGAGCCCGGACAAAGGCTTTTGTTCAGGTAGCACTTCCTCTTTTCCCTTTCCTTCTTTTGGGAGG	chr6	134262922	134263157		2
Inflammation_2	chr6	TXA0447571	ETV6_t6_3	TGGGATTATGTCTATCAGTTGCTGT	TCAAGGATGAAGCCTGTGTTCTG	188	47	TGGGATTATGTCTATCAGTTGCTGTCTGACAGCCGGTACGAAAACTTCATCCGATGGGAGGACAAAGAATCCAAAATATTCCGGATAGTGGATCCCAACGGACTGGCTCGACTCTGGGGAAACCATAAGGTAAAAGGGCCAAATATTTGTTGGGGAAGCTGTTGCCAGAACACAGGCTTCATCCTTGA	chr6	134261704	134261891		8
Inflammation_2	ETV6	TXA0447569	ETV6_t6_2	GCCTCCACAAAAACACTCTCAAC	GGCAACAGCTTCCCCAACAAATA	227	48	GCCTCCACAAAAACACTCTCAACAGCACTCTCCTCTCTCCTCTGTAGACTGTAGACTGCTTTGGGATTATGTCTATCAGTTGCTGTCTGACAGCCGGTACGAAAACTTCATCCGATGGGAGGACAAAGAATCCAAAATATTCCGGATAGTGGATCCCAACGGACTGGCTCGACTCTGGGGAAACCATAAGGTAAAAGGGCCAAATATTTGTTGGGGAAGCTGTTGCC	chr6	134261643	134261869		3
Inflammation_2	chr6	TXA0447570	ETV6_t6_1	TCTAAATCTTGTGACTGCCTCCAC	TCCGTTGGGATCCACTATCCG	179	46	TCTAAATCTTGTGACTGCCTCCACAAAAACACTCTCAACAGCACTCTCCTCTCTCCTCTGTAGACTGTAGACTGCTTTGGGATTATGTCTATCAGTTGCTGTCTGACAGCCGGTACGAAAACTTCATCCGATGGGAGGACAAAGAATCCAAAATATTCCGGATAGTGGATCCCAACGGA	chr6	134261627	134261805		5
Inflammation_2	chr6	TXA0447577	ETV6_t5_9	ATCATGCACCCTTTGATCCTGAA	CGTGCTCTTCCGGTGGG	175	57	ATCATGCACCCTTTGATCCTGAACCCCCGGCACTCGCACTCGGTGGACTTCAAACAGTCCCGGCACTCCGAGGATGGGATGAATCGGGAAGGGAAGCCCATCAACCTGTCTCATCGGGAGGACCTGGCTTACTTGAACCACATCATGGTCTCTATGTCCCCACCGGAAGAGCACG	chr6	134248606	134248780		5
Inflammation_2	chr6	TXA0447566	ETV6_t5_8	GATCCAGCTGATGCCCAG	CTCACCTGCTATTCTCCCAAT	226	58	GATCCAGCTGATGCCCAGCCCCATCATGCACCCTTTGATCCTGAACCCCCGGCACTCGCACTCGGTGGACTTCAAACAGTCCCGGCACTCCGAGGATGGGATGAATCGGGAAGGGAAGCCCATCAACCTGTCTCATCGGGAGGACCTGGCTTACTTGAACCACATCATGGTCTCTATGTCCCCACCGGAAGAGCACGCCATGCCCATTGGGAGAATAGCAGGTGAG	chr6	134248584	134248809		6
Inflammation_2	chr6	TXA0447574	ETV6_t5_7	GGAAACGTACCCCCTGTC	GACTGTTTGAAGTCCACCGAG	162	59	GGAAACGTACCCCCTGTCAGTGTCTCCTGTCGAGAATAATCACTGCCTGCCCTCAAGCCCCTGGCAGGAGAGCACTCGAGTGATCCAGCTGATGCCCAGCCCCATCATGCACCCTTTGATCCTGAACCCCCGGCACTCGCACTCGGTGGACTTCAAACAGTC	chr6	134248503	134248664		1
Inflammation_2	ETV6	TXA0447567	ETV6_t5_6	GAGAACAACCACCAGGAAACGTA	GATGAGACAGGTTGATGGGCTTC	232	58	GAGAACAACCACCAGGAAACGTACCCCCTGTCAGTGTCTCCTGTCGAGAATAATCACTGCCTGCCCTCAAGCCCCTGGCAGGAGAGCACTCGAGTGATCCAGCTGATGCCCAGCCCCATCATGCACCCTTTGATCCTGAACCCCCGGCACTCGCACTCGGTGGACTTCAAACAGTCCCGGCACTCCGAGGATGGGATGAATCGGGAAGGGAAGCCCATCAACCTGTCTCATC	chr6	134248489	134248720		7
Inflammation_2	chr6	TXA0447573	ETV6_t5_5	CCCCCCTAGACAACATGAGC	GTTCAGGATCAAAGGGTGCATGA	209	60	CCCCCCTAGACAACATGAGCCGCCGCCTCTCGCCAGTGGAGAAAGCCCAGGGGCCCAGGCTACAGCAGGAGAACAACCACCAGGAAACGTACCCCCTGTCAGTGTCTCCTGTCGAGAATAATCACTGCCTGCCCTCAAGCCCCTGGCAGGAGAGCACTCGAGTGATCCAGCTGATGCCCAGCCCCATCATGCACCCTTTGATCCTGAAC	chr6	134248421	134248629		8
Inflammation_2	ETV6	TXA0447568	ETV6_t5_4	CATCGAACTCTTACATCGCCCTA	CTTGAGGGCAGGCAGTGATTA	225	60	CATCGAACTCTTACATCGCCCTAGGTCACCCATCACCACAAACCACAGGCCTTCTCCTGACCCCGAACAGCAGCGGCCCCAGCGGTCCCCCCTAGACAACATGAGCCGCCGCCTCTCGCCAGTGGAGAAAGCCCAGGGGCCCAGGCTACAGCAGGAGAACAACCACCAGGAAACGTACCCCCTGTCAGTGTCTCCTGTCGAGAATAATCACTGCCTGCCCTCAAG	chr6	134248335	134248559		4
Inflammation_2	chr6	TXA0447576	ETV6_t5_3	CACAACCCTCCCACCATC	TGGTTGTTCTCCTGCTGTA	179	63	CACAACCCTCCCACCATCGAACTCTTACATCGCCCTAGGTCACCCATCACCACAAACCACAGGCCTTCTCCTGACCCCGAACAGCAGCGGCCCCAGCGGTCCCCCCTAGACAACATGAGCCGCCGCCTCTCGCCAGTGGAGAAAGCCCAGGGGCCCAGGCTACAGCAGGAGAACAACCA	chr6	134248321	134248499		2
Inflammation_2	chr6	TXA0447572	ETV6_t5_2	GCTGCCTACAGAGCAACAGTAAA	CTGTTCGGGGTCAGGAGAAG	210	57	GCTGCCTACAGAGCAACAGTAAAGTCGAGGGGCTGCAGACTCACAGTGGTCTGTGATTGTCTTTTCTTCTGCCCCACAGATAACTGTGTCCAGAGGACACCCAGGACGCCCGCGGAGAGCGTGCACCACAACCCTCCCACCATCGAACTCTTACATCGCCCTAGGTCACCCATCACCACAAACCACAGGCCTTCTCCTGACCCCGAACAG	chr6	134248195	134248404		3
Inflammation_2	ETV6	TXA0447564	ETV6_t5_10	ATGGGATGAATCGGGAAGGGAA	GGCAGCATGGTTACTGTTGGA	222	64	ATGGGATGAATCGGGAAGGGAAGCCCATCAACCTGTCTCATCGGGAGGACCTGGCTTACTTGAACCACATCATGGTCTCTATGTCCCCACCGGAAGAGCACGCCATGCCCATTGGGAGAATAGCAGGTGAGTGAGCTCAgccccttcgcgccccctcgcgccccctcgcgccccctcgcggcccctcgcggcccctcgcgGTCCAACAGTAACCATGCTGCC	chr6	134248679	134248900		4
Inflammation_2	chr6	TXA0447565	ETV6_t5_1	AGGGATCTGGGTTGAGAGAG	CCTGTGGTTTGTGGTGATG	227	56	AGGGATCTGGGTTGAGAGAGGCTCCATGCTTCAATCCAGCTGCCTACAGAGCAACAGTAAAGTCGAGGGGCTGCAGACTCACAGTGGTCTGTGATTGTCTTTTCTTCTGCCCCACAGATAACTGTGTCCAGAGGACACCCAGGACGCCCGCGGAGAGCGTGCACCACAACCCTCCCACCATCGAACTCTTACATCGCCCTAGGTCACCCATCACCACAAACCACAGG	chr6	134248157	134248383		8
Inflammation_2	chr6	TXA0491120	ETV6_t4_2	CATCCCACCTCTTCGCTTC	TATTCAGCCCCTTGCTTTGTCTA	234	50	CATCCCACCTCTTCGCTTCTTGTTCCTTTTTCTCTCCAGGCGACGTGCTCTATGAACTCCTTCAGCATATCCTGAAGCAGAGGAAATCTCGAATGCTCTTCTCACCATTCTTCCCCCCTGGGGACTCTATCCACACCAAGCCAGAGGTCCTCCTGCATCAGAACCATGACGAAGGTACTGGAAAGAGACTTCTCTTTGCTTGCTTGAGGTGTAGACAAAGCAAGGGGCTGAATA	chr6	134233480	134233713	Assays designed by relax mode and have no off-target hits	1
Inflammation_2	ETV6	TXA0447561	ETV6_t4_1	CGTAGCTGTTAAGCAACGCATC	TGTCTACACCTCAAGCAAGCAAA	235	50	CGTAGCTGTTAAGCAACGCATCCCACCTCTTCGCTTCTTGTTCCTTTTTCTCTCCAGGCGACGTGCTCTATGAACTCCTTCAGCATATCCTGAAGCAGAGGAAATCTCGAATGCTCTTCTCACCATTCTTCCCCCCTGGGGACTCTATCCACACCAAGCCAGAGGTCCTCCTGCATCAGAACCATGACGAAGGTACTGGAAAGAGACTTCTCTTTGCTTGCTTGAGGTGTAGACA	chr6	134233462	134233696		7
Inflammation_2	chr6	TXA0447560	ETV6_t3_4	GCTCAAGTGGGCAGAAAATGAGT	AAGATCAGCTATCGTTCCATGC	174	48	GCTCAAGTGGGCAGAAAATGAGTTTTCTTTAAGGCCCATTGAGAGCAACAAGTTCGAAATGAATGGCAAGGCCCTCCTGCTGCTGACCAAAGAGGATTTCCGCTACCGATCTCCTCATTCAGGTAAAAGAGTCTGGTTCTTGCAGAGGCTCAGCATGGAACGATAGCTGATCTT	chr6	134222908	134223081		5
Inflammation_2	ETV6	TXA0447558	ETV6_t3_3	CCGATTTACTGGAGCAGAGATGA	CCATGGGTTATGATGAGTCTGGA	233	48	CCGATTTACTGGAGCAGAGATGACGTAGCCCAGTGGCTCAAGTGGGCAGAAAATGAGTTTTCTTTAAGGCCCATTGAGAGCAACAAGTTCGAAATGAATGGCAAGGCCCTCCTGCTGCTGACCAAAGAGGATTTCCGCTACCGATCTCCTCATTCAGGTAAAAGAGTCTGGTTCTTGCAGAGGCTCAGCATGGAACGATAGCTGATCTTTTCCAGACTCATCATAACCCATGG	chr6	134222873	134223105		1
Inflammation_2	ETV6	TXA0447557	ETV6_t3_2	TTTCCCCCTTTGTTCCAACTGTG	GATCGGTAGCGGAAATCCTCTTT	220	49	TTTCCCCCTTTGTTCCAACTGTGCAGCTGACAAGATCTTTTCTCTCTGTCCTGTGTTGTCCAACAGGTTTGCAGCCGATTTACTGGAGCAGAGATGACGTAGCCCAGTGGCTCAAGTGGGCAGAAAATGAGTTTTCTTTAAGGCCCATTGAGAGCAACAAGTTCGAAATGAATGGCAAGGCCCTCCTGCTGCTGACCAAAGAGGATTTCCGCTACCGATC	chr6	134222799	134223018		4
Inflammation_2	chr6	TXA0447559	ETV6_t3_1	TATTCTGCGACCTTTCCCCCTTT	GCCATTCATTTCGAACTTGTTGC	188	47	TATTCTGCGACCTTTCCCCCTTTGTTCCAACTGTGCAGCTGACAAGATCTTTTCTCTCTGTCCTGTGTTGTCCAACAGGTTTGCAGCCGATTTACTGGAGCAGAGATGACGTAGCCCAGTGGCTCAAGTGGGCAGAAAATGAGTTTTCTTTAAGGCCCATTGAGAGCAACAAGTTCGAAATGAATGGC	chr6	134222787	134222974		8
Inflammation_2	ETV6	TXA0447555	ETV6_t2_2	GAATTTCATACACGCCCCCAGAG	ATCCCATGAACACCAACTCAGAC	238	57	GAATTTCATACACGCCCCCAGAGAGTCCAGTGGCAAGCCACCGTTCCTCGACTCCGCTTCATGTTCACACAGTGCCTCGAGCGCTCAGGATGGAGGAAGACTCGATCCACCTGCCAACACACCTGCGTGAGTATTTACCTTCGAGGAGATGGAAGTTGGGAAGGGGAAGGTCAGACAGAGTCCTGGCCCCTGAGGATCCCAGGGAGAGGCTCTGGGTCTGAGTTGGTGTTCATGGGAT	chr6	134137292	134137529		1
Inflammation_2	chr6	TXA0447556	ETV6_t2_1	CTCCCTCCCCTTTTTCCTAACAG	CAACTTCCATCTCCTCGAAGGTA	188	55	CTCCCTCCCCTTTTTCCTAACAGCAGGAACGAATTTCATACACGCCCCCAGAGAGTCCAGTGGCAAGCCACCGTTCCTCGACTCCGCTTCATGTTCACACAGTGCCTCGAGCGCTCAGGATGGAGGAAGACTCGATCCACCTGCCAACACACCTGCGTGAGTATTTACCTTCGAGGAGATGGAAGTTG	chr6	134137262	134137449		5
Inflammation_2	chr6	TXA0447552	ETV6_t1_2	GGAGAGGAAAGGAAAGTGGAAAA	CAAATAATTCCCCGCCAGCCTA	189	54	GGAGAGGAAAGGAAAGTGGAAAAAAACTGAGAACTTCCTGATCCCTTTCGCTGTGAGACATGTCTGAGACTCCTGCTCAGTCTAGCATTAAGGTAACGATCGGATTCCCCTCCTTCCTCCGCTGGGCGATCGGAACCCCCTTACCCCGGGGCTGCTGGTGCAGTTGCTAGGCTGGCGGGGAATTATTTG	chr6	134036047	134036235		4
Inflammation_2	ETV6	TXA0447551	ETV6_t1_1	CGTTTCTGGGTTGGGGAGAG	GCTGCATCTCCTTTTCCCTCG	229	55	CGTTTCTGGGTTGGGGAGAGGAAAGGAAAGTGGAAAAAAACTGAGAACTTCCTGATCCCTTTCGCTGTGAGACATGTCTGAGACTCCTGCTCAGTCTAGCATTAAGGTAACGATCGGATTCCCCTCCTTCCTCCGCTGGGCGATCGGAACCCCCTTACCCCGGGGCTGCTGGTGCAGTTGCTAGGCTGGCGGGGAATTATTTGGGGCGCGAGGGAAAAGGAGATGCAGC	chr6	134036033	134036261		2
Inflammation_2	BCOR	TXA0167251	BCOR_t9_4	CGAGACTGGGTGGTCTCTTG	GGGTGTTAAAGGGTCACAGTCTT	223	54	CGAGACTGGGTGGTCTCTTGAGGAGAATTTGAGCGTGGCAGCTGGGTGGCCTGGGTGGCCGGTAGCAATTGTTGTAGACGGTCAAAGGGCTTTGGCTCCTGCTTGGCTGGTGGTGACAAATCGTAGTCCGAACTGGGCTCAGGTCGTTTTCTGAATCTCCGCACAGTCATCTGTCACGAGAGTAAGCAGTATGCACAGGTAAGACTGTGACCCTTTAACACCC	chrX	12046944	12047166		5
Inflammation_2	chrx	TXA0447452	BCOR_t9_3	GAGCTTCTGGCGGCATGG	CTGTGCATACTGCTTACTCTCGT	218	56	GAGCTTCTGGCGGCATGGGGCGAGACTGGGTGGTCTCTTGAGGAGAATTTGAGCGTGGCAGCTGGGTGGCCTGGGTGGCCGGTAGCAATTGTTGTAGACGGTCAAAGGGCTTTGGCTCCTGCTTGGCTGGTGGTGACAAATCGTAGTCCGAACTGGGCTCAGGTCGTTTTCTGAATCTCCGCACAGTCATCTGTCACGAGAGTAAGCAGTATGCACAG	chrX	12046924	12047141		2
Inflammation_2	chrx	TXA0447453	BCOR_t9_2	TGCTTCGGATTCCCAGT	CACGCTCAAATTCTCCTCAAG	162	56	TGCTTCGGATTCCCAGTACCCACAAGTATACACTCACCTCATAGCCTAGCCGGGCAGCCCGCTGCAGGAGGGTCTCGCCAGCATTCTTATTGACAATAAGTCTCCGAGCTTCTGGCGGCATGGGGCGAGACTGGGTGGTCTCTTGAGGAGAATTTGAGCGTG	chrX	12046819	12046980		3
Inflammation_2	BCOR	TXA0167231	BCOR_t9_1	GCAGCTGGATGCTTCGGATT	AAAGCCCTTTGACCGTCTACAAC	227	57	GCAGCTGGATGCTTCGGATTCCCAGTACCCACAAGTATACACTCACCTCATAGCCTAGCCGGGCAGCCCGCTGCAGGAGGGTCTCGCCAGCATTCTTATTGACAATAAGTCTCCGAGCTTCTGGCGGCATGGGGCGAGACTGGGTGGTCTCTTGAGGAGAATTTGAGCGTGGCAGCTGGGTGGCCTGGGTGGCCGGTAGCAATTGTTGTAGACGGTCAAAGGGCTTT	chrX	12046810	12047036		8
Inflammation_2	BCOR	TXA0167256	BCOR_t8_6	GCACATCTGTCTTCTGGCTTTCT	TTCTTTCTGCATCGGCTACAACT	237	57	GCACATCTGTCTTCTGGCTTTCTTTAATTTTCTGCTGTTTGGCAGGCAGCCTTGAGGCTGGCGTGCAGCTTGGCTGAGTCTGCTTTTTGCCACTTGCATTGGTGGATGAAAGGCTCTTCATGGGCGGAGAGCCTGAGAGCACAGGCAAGCCTAAATACGGAGGGGGAGGGGGCGGTGCCGGGCGGGGGAGGGGCAGAAGAAGCAGGCGTTACACAGTTGTAGCCGATGCAGAAAGAA	chrX	12047599	12047835		8
Inflammation_2	chrx	TXA0447456	BCOR_t8_5	CAATCCTCGTCTTCCCCTGTG	CCCCCTCCCCCTCCGTA	197	55	CAATCCTCGTCTTCCCCTGTGCACAGCACATCTGTCTTCTGGCTTTCTTTAATTTTCTGCTGTTTGGCAGGCAGCCTTGAGGCTGGCGTGCAGCTTGGCTGAGTCTGCTTTTTGCCACTTGCATTGGTGGATGAAAGGCTCTTCATGGGCGGAGAGCCTGAGAGCACAGGCAAGCCTAAATACGGAGGGGGAGGGGG	chrX	12047574	12047770		6
Inflammation_2	BCOR	TXA0167257	BCOR_t8_4	AAGTGCTTGGTTTTGCACAGTC	CCTTTCATCCACCAATGCAAGTG	219	52	AAGTGCTTGGTTTTGCACAGTCTCTTCCCGGATGGCTTCTCGATGTTGTCTGTGTATTTTTGCAGCGGGGAGGCAGCCTGGCAATCCTCGTCTTCCCCTGTGCACAGCACATCTGTCTTCTGGCTTTCTTTAATTTTCTGCTGTTTGGCAGGCAGCCTTGAGGCTGGCGTGCAGCTTGGCTGAGTCTGCTTTTTGCCACTTGCATTGGTGGATGAAAGG	chrX	12047493	12047711		3
Inflammation_2	chrx	TXA0447455	BCOR_t8_3	GCAAGCTCCTCCTGGACT	AGACTCAGCCAAGCTGCAC	216	54	GCAAGCTCCTCCTGGACTCCTGAGGTATCAAGTGCTTGGTTTTGCACAGTCTCTTCCCGGATGGCTTCTCGATGTTGTCTGTGTATTTTTGCAGCGGGGAGGCAGCCTGGCAATCCTCGTCTTCCCCTGTGCACAGCACATCTGTCTTCTGGCTTTCTTTAATTTTCTGCTGTTTGGCAGGCAGCCTTGAGGCTGGCGTGCAGCTTGGCTGAGTCT	chrX	12047464	12047679		7
Inflammation_2	BCOR	TXA0167248	BCOR_t8_2	TTCATAAGAAGCAGGCACAAGGT	CACAGGGGAAGACGAGGATTG	216	53	TTCATAAGAAGCAGGCACAAGGTGGGGAGCAGGGCAGAAGGTACCTTAGTGTCAGTGTTCTCCACATAGTAGTCGCCTGTGATCTGCAAGCTCCTCCTGGACTCCTGAGGTATCAAGTGCTTGGTTTTGCACAGTCTCTTCCCGGATGGCTTCTCGATGTTGTCTGTGTATTTTTGCAGCGGGGAGGCAGCCTGGCAATCCTCGTCTTCCCCTGTG	chrX	12047379	12047594		4
Inflammation_2	chrx	TXA0447454	BCOR_t8_1	GAGTGCAGTCCAGGAAGATGG	CGCTGCAAAAATACACAGACAAC	210	52	GAGTGCAGTCCAGGAAGATGGGAGCTTCCTTCATAAGAAGCAGGCACAAGGTGGGGAGCAGGGCAGAAGGTACCTTAGTGTCAGTGTTCTCCACATAGTAGTCGCCTGTGATCTGCAAGCTCCTCCTGGACTCCTGAGGTATCAAGTGCTTGGTTTTGCACAGTCTCTTCCCGGATGGCTTCTCGATGTTGTCTGTGTATTTTTGCAGCG	chrX	12047350	12047559		1
Inflammation_2	BCOR	TXA0167224	BCOR_t7_6	CCACCGTTCTCTAAGGTGCAG	CACCCCATTGGTGCTATGTAAGA	233	45	CCACCGTTCTCTAAGGTGCAGCAAGTGGCGTTGCTTTTTAGGATGGAGCCCTGTTAATTCAATGCACACCTTCAGGTTGGTCAGCTCATTACAATGTGGGTCTTCTAAGTGGTTAGAGGAACTGTTTGTCATTTCCCTCTCAGGCCAGTCATCTAATGGAGAAATAACTACAAATTAATCAAAAAGCCCCATGGGGAGGAAAAAAACCTGTCTTACATAGCACCAATGGGGTG	chrX	12048496	12048728		5
Inflammation_2	chrx	TXA0447457	BCOR_t7_5	CTGCTGCTCCCACCGTT	TGGGGCTTTTTGATTAATTTGTAGTT	200	45	CTGCTGCTCCCACCGTTCTCTAAGGTGCAGCAAGTGGCGTTGCTTTTTAGGATGGAGCCCTGTTAATTCAATGCACACCTTCAGGTTGGTCAGCTCATTACAATGTGGGTCTTCTAAGTGGTTAGAGGAACTGTTTGTCATTTCCCTCTCAGGCCAGTCATCTAATGGAGAAATAACTACAAATTAATCAAAAAGCCCCA	chrX	12048487	12048686		2
Inflammation_2	BCOR	TXA0167232	BCOR_t7_4	CCAGGCTTCTCTTCAGTGATGTT	CCCACATTGTAATGAGCTGACCA	219	56	CCAGGCTTCTCTTCAGTGATGTTAGTCCCCTGGGAGGTGACCTCAGGCTGAACAGCCTGGGCCACTTCCTTCCTGCTTTGCCGGCCAGGTTTGCTCTCGGCTGCCGACACCTGCTGCTCCCACCGTTCTCTAAGGTGCAGCAAGTGGCGTTGCTTTTTAGGATGGAGCCCTGTTAATTCAATGCACACCTTCAGGTTGGTCAGCTCATTACAATGTGGG	chrX	12048377	12048595		8
Inflammation_2	chrx	TXA0447458	BCOR_t7_3	CTTTGGCCTCTGCCTTTTTCCTG	GTGCATTGAATTAACAGGGCTCC	209	56	CTTTGGCCTCTGCCTTTTTCCTGCCAGGCTTCTCTTCAGTGATGTTAGTCCCCTGGGAGGTGACCTCAGGCTGAACAGCCTGGGCCACTTCCTTCCTGCTTTGCCGGCCAGGTTTGCTCTCGGCTGCCGACACCTGCTGCTCCCACCGTTCTCTAAGGTGCAGCAAGTGGCGTTGCTTTTTAGGATGGAGCCCTGTTAATTCAATGCAC	chrX	12048354	12048562		4
Inflammation_2	chrx	TXA0447459	BCOR_t7_2	CATGACCTATCCTCTAGAAGCAC	TCACCTCCCAGGGGACTAA	168	52	CATGACCTATCCTCTAGAAGCACAGTGAGTAGCCAAGAGGTGGTCTCTGCATACCTTGCTCATTGTCACAGGATTTGAGCGACTCTTCAGACCAGCCTCTGTTGCCTTTGGCCTCTGCCTTTTTCCTGCCAGGCTTCTCTTCAGTGATGTTAGTCCCCTGGGAGGTGA	chrX	12048249	12048416		7
Inflammation_2	BCOR	TXA0167233	BCOR_t7_1	GTTCCCATGGAATGCATGACCTA	GGCAAAGCAGGAAGGAAGTGG	224	54	GTTCCCATGGAATGCATGACCTATCCTCTAGAAGCACAGTGAGTAGCCAAGAGGTGGTCTCTGCATACCTTGCTCATTGTCACAGGATTTGAGCGACTCTTCAGACCAGCCTCTGTTGCCTTTGGCCTCTGCCTTTTTCCTGCCAGGCTTCTCTTCAGTGATGTTAGTCCCCTGGGAGGTGACCTCAGGCTGAACAGCCTGGGCCACTTCCTTCCTGCTTTGCC	chrX	12048235	12048458		3
Inflammation_2	chrx	TXA0490455	BCOR_t6_5	AGGTGGCCTCTCCAAGAA	CCTGCCTACGCCCCAT	175	46	AGGTGGCCTCTCCAAGAAATACTTTTCCACAGGAAGATCTTTGTCCTCTGGGGCTTCAAAGAGATCATGTTTGTTTCCAGTGCTATACTCACCTGTGAGAACAGACAAAAAAAAAAAAATTCAGAAATCAGGATCTAGCTCCCTACATGGAGGCGGGCTATGGGGCGTAGGCAGG	chrX	12049161	12049335		4
Inflammation_2	BCOR	TXA0167243	BCOR_t6_4	TTTCCTGTCTAGCCGGAGGG	CCCATAGCCCGCCTCCAT	236	50	TTTCCTGTCTAGCCGGAGGGTGGGGCTGTGTGGCGTGTCCACCACCCCCTGGTCACTGGGTGGCTCACTCACAGGTGGCCTCTCCAAGAAATACTTTTCCACAGGAAGATCTTTGTCCTCTGGGGCTTCAAAGAGATCATGTTTGTTTCCAGTGCTATACTCACCTGTGAGAACAGACAAAAAAAAAAAAATTCAGAAATCAGGATCTAGCTCCCTACATGGAGGCGGGCTATGGG	chrX	12049089	12049324		7
Inflammation_2	chrx	TXA0447461	BCOR_t6_3	GTCACCTGACAGTTTGCGTTTC	ACATGATCTCTTTGAAGCCCCAG	160	56	GTCACCTGACAGTTTGCGTTTCCTGTCTAGCCGGAGGGTGGGGCTGTGTGGCGTGTCCACCACCCCCTGGTCACTGGGTGGCTCACTCACAGGTGGCCTCTCCAAGAAATACTTTTCCACAGGAAGATCTTTGTCCTCTGGGGCTTCAAAGAGATCATGT	chrX	12049071	12049230		8
Inflammation_2	chrx	TXA0447462	BCOR_t6_2	CAGGCAGTGGGAGCTGAC	GGTGGACACGCCACACA	164	60	CAGGCAGTGGGAGCTGACCACACTCACCTTTGGAGATCCGTCTTCGCTTGGCTTTCAGAGGGTCCTCAGCTAGCTCTTCCACAGCGGTCTCAGTGTGGGTGCTGTCACCTGACAGTTTGCGTTTCCTGTCTAGCCGGAGGGTGGGGCTGTGTGGCGTGTCCACC	chrX	12048968	12049131		1
Inflammation_2	BCOR	TXA0167223	BCOR_t6_1	ACACTCAATTGCGCCCTCTG	GTGAGTGAGCCACCCAGTGA	238	61	ACACTCAATTGCGCCCTCTGCGGCTGCATGCAAAGGCCTCCCAAGCAGGCAGTGGGAGCTGACCACACTCACCTTTGGAGATCCGTCTTCGCTTGGCTTTCAGAGGGTCCTCAGCTAGCTCTTCCACAGCGGTCTCAGTGTGGGTGCTGTCACCTGACAGTTTGCGTTTCCTGTCTAGCCGGAGGGTGGGGCTGTGTGGCGTGTCCACCACCCCCTGGTCACTGGGTGGCTCACTCAC	chrX	12048923	12049160		6
Inflammation_2	chrx	TXA0447463	BCOR_t5_4	GACTTTGGCTTCTTTTCCTGATT	CTTTATGGTAAGATGTTGTGTTTTTT	190	45	GACTTTGGCTTCTTTTCCTGATTTCCTTTCAACCTTTCCCAGTCGGCTGGGCTGAATTTGCACACCTCGGAGTCTTTGGTTGCTGGGTGGCTACCTTCTCTCTCTTTCATCTCCAACTCTGAGAAGCGCATCATTGCACGCTAGAAAGAAAACGAAGATGGAAAAAAAAACACAACATCTTACCATAAAG	chrX	12055016	12055205		3
Inflammation_2	BCOR	TXA0167241	BCOR_t5_3	CCTCTTCCAGGGTGACTGACTTT	GGCACATGAAATAGCCTTTATGGT	222	46	CCTCTTCCAGGGTGACTGACTTTGGCTTCTTTTCCTGATTTCCTTTCAACCTTTCCCAGTCGGCTGGGCTGAATTTGCACACCTCGGAGTCTTTGGTTGCTGGGTGGCTACCTTCTCTCTCTTTCATCTCCAACTCTGAGAAGCGCATCATTGCACGCTAGAAAGAAAACGAAGATGGAAAAAAAAACACAACATCTTACCATAAAGGCTATTTCATGTGCC	chrX	12054999	12055220		7
Inflammation_2	BCOR	TXA0167264	BCOR_t5_2	GCTCTCACCAATGTGATGCTACA	CGCTTCTCAGAGTTGGAGATGAA	221	52	GCTCTCACCAATGTGATGCTACAGCCCAGCTGCTCGGGTTACTTACATCTCTCACTGTCATTCTGGTCGGCAATGGCCTCTTCCAGGGTGACTGACTTTGGCTTCTTTTCCTGATTTCCTTTCAACCTTTCCCAGTCGGCTGGGCTGAATTTGCACACCTCGGAGTCTTTGGTTGCTGGGTGGCTACCTTCTCTCTCTTTCATCTCCAACTCTGAGAAGCG	chrX	12054923	12055143		4
Inflammation_2	chrx	TXA0447464	BCOR_t5_1	AGGGTGGCTCTGCTCTCA	AAGACTCCGAGGTGTGCAAATTC	180	52	AGGGTGGCTCTGCTCTCACCAATGTGATGCTACAGCCCAGCTGCTCGGGTTACTTACATCTCTCACTGTCATTCTGGTCGGCAATGGCCTCTTCCAGGGTGACTGACTTTGGCTTCTTTTCCTGATTTCCTTTCAACCTTTCCCAGTCGGCTGGGCTGAATTTGCACACCTCGGAGTCTT	chrX	12054912	12055091		5
Inflammation_2	chrx	TXA0447465	BCOR_t4_2	AACTCAAAAGGTTTATGGAAGATT	ATGCTGATAAAAATGGATGAAGT	168	33	AACTCAAAAGGTTTATGGAAGATTCTAGTAATAAAAATTTGAAGAACTGACCTCACAGTAAGCAGCGGGTAGACATAAAATACTGTCCTCTTGTAATCCTTCCATCTATGTAATTAAAATGGGCACTCAATGGATCATTTAGATAACTTCATCCATTTTTATCAGCAT	chrX	12055588	12055755		1
Inflammation_2	BCOR	TXA0167240	BCOR_t4_1	TGTACAATGAACAAAGACGACCA	ATGATCCATTGAGTGCCCATTTT	202	35	TGTACAATGAACAAAGACGACCATGGCCCACAAACTTCCCTTTGTATATTTGGAAATGAAATTTAACTCAAAAGGTTTATGGAAGATTCTAGTAATAAAAATTTGAAGAACTGACCTCACAGTAAGCAGCGGGTAGACATAAAATACTGTCCTCTTGTAATCCTTCCATCTATGTAATTAAAATGGGCACTCAATGGATCAT	chrX	12055524	12055725		2
Inflammation_2	chrx	TXA0447490	BCOR_t3_9	TGATTCGGCCCAGCTC	AGCGACAAACTGGTCTAC	190	55	TGATTCGGCCCAGCTCCTCTCTGAGGGAGATGAATTCACGGCGTTGTTGGATCACAGGGTCAGCTGAGGGCTTGGTGGCCTCGGTGTCCTGACCTACATTCTCGGCTACAAGGCCTGCTTTGGGTGCCCCTGCATCAGTTTTAGTGTCTGCTTCTTCTCGGAGAAGGTCTACGTAGACCAGTTTGTCGCT	chrX	12056766	12056955		4
Inflammation_2	chrx	TXA0447467	BCOR_t3_8	CTATCCTTGCCTAAGCTGAACA	GAAGCAGACACTAAAACTGATGC	224	54	CTATCCTTGCCTAAGCTGAACACTGGCTGGCTTGAGGCCTGTTTGAAAGTGAAAGATTCATGGAAGTCAGTGATTCGGCCCAGCTCCTCTCTGAGGGAGATGAATTCACGGCGTTGTTGGATCACAGGGTCAGCTGAGGGCTTGGTGGCCTCGGTGTCCTGACCTACATTCTCGGCTACAAGGCCTGCTTTGGGTGCCCCTGCATCAGTTTTAGTGTCTGCTTC	chrX	12056696	12056919		3
Inflammation_2	chrx	TXA0447496	BCOR_t3_7	CCAAGAATGGAGTTGCTACCT	CCACCAAGCCCTCAGC	207	53	CCAAGAATGGAGTTGCTACCTGCACACCCAGGTTCTCTTTGTTGGTTCCTGCTGCACCACTATCCTTGCCTAAGCTGAACACTGGCTGGCTTGAGGCCTGTTTGAAAGTGAAAGATTCATGGAAGTCAGTGATTCGGCCCAGCTCCTCTCTGAGGGAGATGAATTCACGGCGTTGTTGGATCACAGGGTCAGCTGAGGGCTTGGTGG	chrX	12056637	12056843		7
Inflammation_2	chrx	TXA0447473	BCOR_t3_6	GGTTTTACCAAAAGTCACAGCAG	ACCCTGTGATCCAACAACG	236	52	GGTTTTACCAAAAGTCACAGCAGGGCCCTCACTGCCCAGAGCTGTCTCCAAGAATGGAGTTGCTACCTGCACACCCAGGTTCTCTTTGTTGGTTCCTGCTGCACCACTATCCTTGCCTAAGCTGAACACTGGCTGGCTTGAGGCCTGTTTGAAAGTGAAAGATTCATGGAAGTCAGTGATTCGGCCCAGCTCCTCTCTGAGGGAGATGAATTCACGGCGTTGTTGGATCACAGGGT	chrX	12056590	12056825		1
Inflammation_2	chrx	TXA0447484	BCOR_t3_5	GGTGACATCCATGTTTGGAG	TTCACTTTCAAACAGGCCTCAAG	216	53	GGTGACATCCATGTTTGGAGGGGCACCGCCCACACAAAATGGTTTGGGATCCTCTTGGGTTTTACCAAAAGTCACAGCAGGGCCCTCACTGCCCAGAGCTGTCTCCAAGAATGGAGTTGCTACCTGCACACCCAGGTTCTCTTTGTTGGTTCCTGCTGCACCACTATCCTTGCCTAAGCTGAACACTGGCTGGCTTGAGGCCTGTTTGAAAGTGAA	chrX	12056533	12056748		2
Inflammation_2	chrx	TXA0447477	BCOR_t3_45	CAATCCACACAAGCCAGAATAA	CCAGGGCTGCTACTGTG	179	55	CAATCCACACAAGCCAGAATAAACGATGTTTCCAGGGACCCGGAGCCCTTCCCGGATGAGGCCTGTGCGGTCCATGCTCAGTGCTGCCAGGCCATCGATCCGATGGGCTCCACTGGTATCCACCTTTGTAAAAGAATAACACAAGTTACTTGGGACACCTGTCACAGTAGCAGCCCTGG	chrX	12059068	12059246		1
Inflammation_2	chrx	TXA0447466	BCOR_t3_44	TTCTTTCCGAAGAAAACCCAAG	GTGACAGGTGTCCCAAGTAA	232	54	TTCTTTCCGAAGAAAACCCAAGGCCACTGAGAGAGCTTGGGGTAGCCTCCCGACCTTTTTCTGAGCCCAATCCACACAAGCCAGAATAAACGATGTTTCCAGGGACCCGGAGCCCTTCCCGGATGAGGCCTGTGCGGTCCATGCTCAGTGCTGCCAGGCCATCGATCCGATGGGCTCCACTGGTATCCACCTTTGTAAAAGAATAACACAAGTTACTTGGGACACCTGTCAC	chrX	12059001	12059232		5
Inflammation_2	chrx	TXA0447476	BCOR_t3_43	ATATAGCACTGAAGCCATTTGGG	CTCATCCGGGAAGGGCTC	217	52	ATATAGCACTGAAGCCATTTGGGGGTTTTCCAGAGACAGCAGAAGCCTCCACTGTCTCGGGAGTATTCGGTTTGAATTGCATCTCTGGATTTCTTTCCGAAGAAAACCCAAGGCCACTGAGAGAGCTTGGGGTAGCCTCCCGACCTTTTTCTGAGCCCAATCCACACAAGCCAGAATAAACGATGTTTCCAGGGACCCGGAGCCCTTCCCGGATGAG	chrX	12058911	12059127		2
Inflammation_2	BCOR	TXA0167259	BCOR_t3_42	AGCTACAGCGCTCTTTTGTATCC	GGGTCCCTGGAAACATCGTTTAT	236	50	AGCTACAGCGCTCTTTTGTATCCCAGGCGGTGTTTTGTATATAGCACTGAAGCCATTTGGGGGTTTTCCAGAGACAGCAGAAGCCTCCACTGTCTCGGGAGTATTCGGTTTGAATTGCATCTCTGGATTTCTTTCCGAAGAAAACCCAAGGCCACTGAGAGAGCTTGGGGTAGCCTCCCGACCTTTTTCTGAGCCCAATCCACACAAGCCAGAATAAACGATGTTTCCAGGGACCC	chrX	12058873	12059108		7
Inflammation_2	chrx	TXA0447494	BCOR_t3_41	CGCAGGTAACTAGCACCATTGA	TCCAGAGATGCAATTCAAACCGA	207	50	CGCAGGTAACTAGCACCATTGATGTTGAGAGGGCTCTGTTTGTCACTGGCAGGCCTATCCAAACCCAAGCTTTCCGCTGTAGCTACAGCGCTCTTTTGTATCCCAGGCGGTGTTTTGTATATAGCACTGAAGCCATTTGGGGGTTTTCCAGAGACAGCAGAAGCCTCCACTGTCTCGGGAGTATTCGGTTTGAATTGCATCTCTGGA	chrX	12058793	12058999		1
Inflammation_2	chrx	TXA0447472	BCOR_t3_40	CAGTGAATACTTATTTGGCGAGT	ATGGCTTCAGTGCTATATACAAA	218	52	CAGTGAATACTTATTTGGCGAGTCGAGGAAAGGGTATATGGCTGGAGTGGCCCCCTCCATGTAAGGGTTGACCCAGGGCAGCCGCAGGTAACTAGCACCATTGATGTTGAGAGGGCTCTGTTTGTCACTGGCAGGCCTATCCAAACCCAAGCTTTCCGCTGTAGCTACAGCGCTCTTTTGTATCCCAGGCGGTGTTTTGTATATAGCACTGAAGCCAT	chrX	12058711	12058928		4
Inflammation_2	BCOR	TXA0167258	BCOR_t3_4	ACATAACCTGCCGAGTTAGCAAT	GTGCAGGTAGCAACTCCATTCTT	239	52	ACATAACCTGCCGAGTTAGCAATTCTCTTTGCCAGCTTGGATGGCTTGGGTTTCAGAACTTTGCCATCGTTGGATTCGGCCTCATCAGTTCCTTCTTTGGTATAGGCGGGGGTGACATCCATGTTTGGAGGGGCACCGCCCACACAAAATGGTTTGGGATCCTCTTGGGTTTTACCAAAAGTCACAGCAGGGCCCTCACTGCCCAGAGCTGTCTCCAAGAATGGAGTTGCTACCTGCAC	chrX	12056423	12056661		4
Inflammation_2	chrx	TXA0447482	BCOR_t3_39	GGACTGCTGAGGTAGCAAG	GGAAAGCTTGGGTTTGGATAGG	190	53	GGACTGCTGAGGTAGCAAGGCCTTGTACATATTCAGTGAATACTTATTTGGCGAGTCGAGGAAAGGGTATATGGCTGGAGTGGCCCCCTCCATGTAAGGGTTGACCCAGGGCAGCCGCAGGTAACTAGCACCATTGATGTTGAGAGGGCTCTGTTTGTCACTGGCAGGCCTATCCAAACCCAAGCTTTCC	chrX	12058678	12058867		8
Inflammation_2	BCOR	TXA0167255	BCOR_t3_38	ATGTGAGGGTTGACATAGTGTGG	ACATCAATGGTGCTAGTTACCTG	232	54	ATGTGAGGGTTGACATAGTGTGGGGGTGGCAGGTAGAGGAAGCGTTCCCCACTGGTGCAGACAGGAGAATACAGTGGCTGGGCCAAGCCGTAGGACTGCTGAGGTAGCAAGGCCTTGTACATATTCAGTGAATACTTATTTGGCGAGTCGAGGAAAGGGTATATGGCTGGAGTGGCCCCCTCCATGTAAGGGTTGACCCAGGGCAGCCGCAGGTAACTAGCACCATTGATGT	chrX	12058586	12058817		6
Inflammation_2	chrx	TXA0447489	BCOR_t3_37	TGGGTGAAGCCAAGGAGG	GCCATATACCCTTTCCTCGAC	190	54	TGGGTGAAGCCAAGGAGGAGGGGATGTGAGGGTTGACATAGTGTGGGGGTGGCAGGTAGAGGAAGCGTTCCCCACTGGTGCAGACAGGAGAATACAGTGGCTGGGCCAAGCCGTAGGACTGCTGAGGTAGCAAGGCCTTGTACATATTCAGTGAATACTTATTTGGCGAGTCGAGGAAAGGGTATATGGC	chrX	12058563	12058752		3
Inflammation_2	BCOR	TXA0167262	BCOR_t3_36	GGTTGACGCCCATCTTCCAT	CTTGCTACCTCAGCAGTCCTAC	224	59	GGTTGACGCCCATCTTCCATGGGAGGCTTTTGTCTGAGCAGTGGACGAGAGGTGGAATGGCCGCAGAGGCTGAAGGTGTGGAGAGCCTCATGGGTGAAGCCAAGGAGGAGGGGATGTGAGGGTTGACATAGTGTGGGGGTGGCAGGTAGAGGAAGCGTTCCCCACTGGTGCAGACAGGAGAATACAGTGGCTGGGCCAAGCCGTAGGACTGCTGAGGTAGCAAG	chrX	12058473	12058696		2
Inflammation_2	chrx	TXA0447497	BCOR_t3_35	GGTAACTGTGGGAATCTACTGGG	GCTTCCTCTACCTGCCACC	186	58	GGTAACTGTGGGAATCTACTGGGTTCCCAGGGTTGACGCCCATCTTCCATGGGAGGCTTTTGTCTGAGCAGTGGACGAGAGGTGGAATGGCCGCAGAGGCTGAAGGTGTGGAGAGCCTCATGGGTGAAGCCAAGGAGGAGGGGATGTGAGGGTTGACATAGTGTGGGGGTGGCAGGTAGAGGAAGC	chrX	12058443	12058628		1
Inflammation_2	BCOR	TXA0167252	BCOR_t3_34	GAGGTGAAGGAGGCAACAGG	CTCCTCCTTGGCTTCACCCAT	239	58	GAGGTGAAGGAGGCAACAGGAGAGCTGTGTCCCCTGGCAGGCCACTATTGACTGCCTTGGCAGAGGTCACCCGGGGCTGTTTACTGTTTTGGATGTGGGGGTAACTGTGGGAATCTACTGGGTTCCCAGGGTTGACGCCCATCTTCCATGGGAGGCTTTTGTCTGAGCAGTGGACGAGAGGTGGAATGGCCGCAGAGGCTGAAGGTGTGGAGAGCCTCATGGGTGAAGCCAAGGAGGAG	chrX	12058344	12058582		7
Inflammation_2	chrx	TXA0447491	BCOR_t3_33	CTGAGTTGGAAGGTGGACCC	CTCGTCCACTGCTCAGACAAAAG	210	59	CTGAGTTGGAAGGTGGACCCGGGCTGAGGGCCGAGGTGAAGGAGGCAACAGGAGAGCTGTGTCCCCTGGCAGGCCACTATTGACTGCCTTGGCAGAGGTCACCCGGGGCTGTTTACTGTTTTGGATGTGGGGGTAACTGTGGGAATCTACTGGGTTCCCAGGGTTGACGCCCATCTTCCATGGGAGGCTTTTGTCTGAGCAGTGGACGAG	chrX	12058312	12058521		5
Inflammation_2	BCOR	TXA0167254	BCOR_t3_32	GAGAACTCGCTATTGGCTGTCAT	CCCCCACATCCAAAACAGTAAAC	240	59	GAGAACTCGCTATTGGCTGTCATGTATGGCTTCGTCAGGGTGACTGAGGGAGAGGTGGAGATCCTGGGATAGTGCTTGTGGAACTCGGAGTAGGTCTCTGCAGCGGGCTGAGTTGGAAGGTGGACCCGGGCTGAGGGCCGAGGTGAAGGAGGCAACAGGAGAGCTGTGTCCCCTGGCAGGCCACTATTGACTGCCTTGGCAGAGGTCACCCGGGGCTGTTTACTGTTTTGGATGTGGGGG	chrX	12058205	12058444		4
Inflammation_2	chrx	TXA0447483	BCOR_t3_31	CCTGGATGTAGAGAACTCGCTATT	CCAGGGGACACAGCTCTC	186	59	CCTGGATGTAGAGAACTCGCTATTGGCTGTCATGTATGGCTTCGTCAGGGTGACTGAGGGAGAGGTGGAGATCCTGGGATAGTGCTTGTGGAACTCGGAGTAGGTCTCTGCAGCGGGCTGAGTTGGAAGGTGGACCCGGGCTGAGGGCCGAGGTGAAGGAGGCAACAGGAGAGCTGTGTCCCCTGG	chrX	12058195	12058380		1
Inflammation_2	chrx	TXA0447486	BCOR_t3_30	TGAGCCCCCATCTTTTCTGTC	ATCTCCACCTCTCCCTCAGTCA	180	55	TGAGCCCCCATCTTTTCTGTCTTGAACCGTTGTCTTCCGGGTGTGCCCAGGCATGGATTGAGCACAGTCGCCCCCATCTAGAGCCTTGGGGTACTTGCCATTGGACAGCCTGGATGTAGAGAACTCGCTATTGGCTGTCATGTATGGCTTCGTCAGGGTGACTGAGGGAGAGGTGGAGAT	chrX	12058087	12058266		6
Inflammation_2	chrx	TXA0447478	BCOR_t3_3	GAATCGGTCGCCCACATAA	AAAACCCAAGAGGATCCCAAA	186	52	GAATCGGTCGCCCACATAACCTGCCGAGTTAGCAATTCTCTTTGCCAGCTTGGATGGCTTGGGTTTCAGAACTTTGCCATCGTTGGATTCGGCCTCATCAGTTCCTTCTTTGGTATAGGCGGGGGTGACATCCATGTTTGGAGGGGCACCGCCCACACAAAATGGTTTGGGATCCTCTTGGGTTTT	chrX	12056410	12056595		5
Inflammation_2	BCOR	TXA0167261	BCOR_t3_29	ACATCTTTGGTAACGGTCTGCTT	CACAAGCACTATCCCAGGATCTC	236	54	ACATCTTTGGTAACGGTCTGCTTTTCCAACAGAGGTGGTGAGCCCCCATCTTTTCTGTCTTGAACCGTTGTCTTCCGGGTGTGCCCAGGCATGGATTGAGCACAGTCGCCCCCATCTAGAGCCTTGGGGTACTTGCCATTGGACAGCCTGGATGTAGAGAACTCGCTATTGGCTGTCATGTATGGCTTCGTCAGGGTGACTGAGGGAGAGGTGGAGATCCTGGGATAGTGCTTGTG	chrX	12058049	12058284		2
Inflammation_2	chrx	TXA0447492	BCOR_t3_28	GGGAGCCATCTTTTTCATGTGGT	CGACTGTGCTCAATCCATGCC	190	52	GGGAGCCATCTTTTTCATGTGGTCACCTTTGGAAGCGTCCGCATCCACCACTTTAGAAGACAGGTCAAGTGGTTTGTCTGTGACATCTTTGGTAACGGTCTGCTTTTCCAACAGAGGTGGTGAGCCCCCATCTTTTCTGTCTTGAACCGTTGTCTTCCGGGTGTGCCCAGGCATGGATTGAGCACAGTCG	chrX	12057967	12058156		3
Inflammation_2	BCOR	TXA0167237	BCOR_t3_27	CTCACTTCCAGAGAGCACTAAGC	CACACCCGGAAGACAACGG	219	52	CTCACTTCCAGAGAGCACTAAGCCACTTGCAGCCCGACTGTGAACCAGGACTGTGGGAGCCATCTTTTTCATGTGGTCACCTTTGGAAGCGTCCGCATCCACCACTTTAGAAGACAGGTCAAGTGGTTTGTCTGTGACATCTTTGGTAACGGTCTGCTTTTCCAACAGAGGTGGTGAGCCCCCATCTTTTCTGTCTTGAACCGTTGTCTTCCGGGTGTG	chrX	12057913	12058131		8
Inflammation_2	chrx	TXA0447487	BCOR_t3_26	CCCTGGCACCACCCAG	ACTTGACCTGTCTTCTAAAGTGG	220	50	CCCTGGCACCACCCAGGATGAGGGAGCAGTGCTGATGATCTCTGATCTATAGATAGAACATCCATTTCCTGGAGGAGATAGTGTTTCTTTCGGAATCTCACTTCCAGAGAGCACTAAGCCACTTGCAGCCCGACTGTGAACCAGGACTGTGGGAGCCATCTTTTTCATGTGGTCACCTTTGGAAGCGTCCGCATCCACCACTTTAGAAGACAGGTCAAGT	chrX	12057817	12058036		7
Inflammation_2	BCOR	TXA0167227	BCOR_t3_25	GTGACAGACTTTTGCCATTGTTCT	GCTTCCAAAGGTGACCACATGA	226	49	GTGACAGACTTTTGCCATTGTTCTCTTCATTAGGACTTGGCCCTGGCACCACCCAGGATGAGGGAGCAGTGCTGATGATCTCTGATCTATAGATAGAACATCCATTTCCTGGAGGAGATAGTGTTTCTTTCGGAATCTCACTTCCAGAGAGCACTAAGCCACTTGCAGCCCGACTGTGAACCAGGACTGTGGGAGCCATCTTTTTCATGTGGTCACCTTTGGAAGC	chrX	12057777	12058002		5
Inflammation_2	chrx	TXA0447475	BCOR_t3_24	CCAGTCCAAAGCCTTGTTTTTC	GATTCCGAAAGAAACACTATCTCC	160	46	CCAGTCCAAAGCCTTGTTTTTCAGTGACAGACTTTTGCCATTGTTCTCTTCATTAGGACTTGGCCCTGGCACCACCCAGGATGAGGGAGCAGTGCTGATGATCTCTGATCTATAGATAGAACATCCATTTCCTGGAGGAGATAGTGTTTCTTTCGGAATC	chrX	12057754	12057913		4
Inflammation_2	BCOR	TXA0167222	BCOR_t3_23	CGTCCTGAGCTGGACACG	TCCTCCAGGAAATGGATGTTCTA	234	53	CGTCCTGAGCTGGACACGGACCCTGAAACATTAGTGACCACGGCATCTGTGCCACCCATGCGGGGACACGAGGAACTCCGCTGTTGCGGTATTGCCCAGTCCAAAGCCTTGTTTTTCAGTGACAGACTTTTGCCATTGTTCTCTTCATTAGGACTTGGCCCTGGCACCACCCAGGATGAGGGAGCAGTGCTGATGATCTCTGATCTATAGATAGAACATCCATTTCCTGGAGGA	chrX	12057659	12057892		2
Inflammation_2	chrx	TXA0447474	BCOR_t3_22	GGTCTTGGTGCCATCTGCAT	GGGCCAAGTCCTAATGAAGAGAA	219	57	GGTCTTGGTGCCATCTGCATTGGCGTTGGCGTTGGGGGCTGGTGATGCAGAGGCTGGGCGTCCTGAGCTGGACACGGACCCTGAAACATTAGTGACCACGGCATCTGTGCCACCCATGCGGGGACACGAGGAACTCCGCTGTTGCGGTATTGCCCAGTCCAAAGCCTTGTTTTTCAGTGACAGACTTTTGCCATTGTTCTCTTCATTAGGACTTGGCCC	chrX	12057601	12057819		8
Inflammation_2	BCOR	TXA0167230	BCOR_t3_21	TTGGCAGGCGTGGATGAG	CAAGGCTTTGGACTGGGCAATAC	240	61	TTGGCAGGCGTGGATGAGGGCTGGCCCACATGCTGGATGACTGATGGCGTGGTATCCACCGAGCTCCTGCTGGTCTTGGTGCCATCTGCATTGGCGTTGGCGTTGGGGGCTGGTGATGCAGAGGCTGGGCGTCCTGAGCTGGACACGGACCCTGAAACATTAGTGACCACGGCATCTGTGCCACCCATGCGGGGACACGAGGAACTCCGCTGTTGCGGTATTGCCCAGTCCAAAGCCTTG	chrX	12057530	12057769		6
Inflammation_2	chrx	TXA0447493	BCOR_t3_20	TGAAGCTCGGTTCTGGGTTG	ACTAATGTTTCAGGGTCCGTGTC	220	61	TGAAGCTCGGTTCTGGGTTGGCTTTGGCTCCCTTGCTGCTGGTGCTGCCACCGTGCTTGGCAGGCGTGGATGAGGGCTGGCCCACATGCTGGATGACTGATGGCGTGGTATCCACCGAGCTCCTGCTGGTCTTGGTGCCATCTGCATTGGCGTTGGCGTTGGGGGCTGGTGATGCAGAGGCTGGGCGTCCTGAGCTGGACACGGACCCTGAAACATTAGT	chrX	12057474	12057693		1
Inflammation_2	BCOR	TXA0167249	BCOR_t3_2	CCCCCAAATCCCCTTTGTACATT	GAATCCAACGATGGCAAAGTTCT	230	50	CCCCCAAATCCCCTTTGTACATTACAAAAACTGACAACTGATAAAGTTAGTGAAATTCGGGTTGGGGGGCTCACCTGCAATGCCCGCTGCTCTCGGCTGAGCTGACTGGAATCTGCATACAGTTCGGTGGTGACACACTTGAATCGGTCGCCCACATAACCTGCCGAGTTAGCAATTCTCTTTGCCAGCTTGGATGGCTTGGGTTTCAGAACTTTGCCATCGTTGGATTC	chrX	12056270	12056499		8
Inflammation_2	BCOR	TXA0167265	BCOR_t3_19	ACTCCTAGGGTAGGGAATTGCTG	CCAATGCAGATGGCACCAAGA	239	57	ACTCCTAGGGTAGGGAATTGCTGGGGACCTGAATGCTTCATTTGGAGATAGAAATATTGAGGTTGGCGGGAGGCCATTCTCACTCGCTTTGAAGCTCGGTTCTGGGTTGGCTTTGGCTCCCTTGCTGCTGGTGCTGCCACCGTGCTTGGCAGGCGTGGATGAGGGCTGGCCCACATGCTGGATGACTGATGGCGTGGTATCCACCGAGCTCCTGCTGGTCTTGGTGCCATCTGCATTGG	chrX	12057385	12057623		3
Inflammation_2	chrx	TXA0447485	BCOR_t3_18	GTGCTGCGTAAGGGAGGTAA	GATACCACGCCATCAGTCATCC	220	56	GTGCTGCGTAAGGGAGGTAACTCCTAGGGTAGGGAATTGCTGGGGACCTGAATGCTTCATTTGGAGATAGAAATATTGAGGTTGGCGGGAGGCCATTCTCACTCGCTTTGAAGCTCGGTTCTGGGTTGGCTTTGGCTCCCTTGCTGCTGGTGCTGCCACCGTGCTTGGCAGGCGTGGATGAGGGCTGGCCCACATGCTGGATGACTGATGGCGTGGTATC	chrX	12057366	12057585		8
Inflammation_2	chrx	TXA0447479	BCOR_t3_17	AGGCTTTGGGGCAAGGTG	CTCCCGCCAACCTCAATATTTCT	204	51	AGGCTTTGGGGCAAGGTGCCCAGGAAACAGACTGCCATTGGGTAACAAAACTGGGTGAGGATACACAGGTCCTTTGCCATGTAAAGAGAGGGGACTTAGAGCGATGCCTTCTGGTGCTGCGTAAGGGAGGTAACTCCTAGGGTAGGGAATTGCTGGGGACCTGAATGCTTCATTTGGAGATAGAAATATTGAGGTTGGCGGGAG	chrX	12057253	12057456		1
Inflammation_2	chrx	TXA0447470	BCOR_t3_16	GCATCTTGGTAGGTCACAAATTC	CTCCAAATGAAGCATTCAGGTC	235	54	GCATCTTGGTAGGTCACAAATTCTGGCCTGCTCGTATGCAGCCCGTAAGGCAGGCCAGGCTTTGGGGCAAGGTGCCCAGGAAACAGACTGCCATTGGGTAACAAAACTGGGTGAGGATACACAGGTCCTTTGCCATGTAAAGAGAGGGGACTTAGAGCGATGCCTTCTGGTGCTGCGTAAGGGAGGTAACTCCTAGGGTAGGGAATTGCTGGGGACCTGAATGCTTCATTTGGAG	chrX	12057197	12057431		7
Inflammation_2	chrx	TXA0447495	BCOR_t3_15	CTCTCCGGCTTCTCCTCTTTT	TTACCCAATGGCAGTCTGTTTC	179	57	CTCTCCGGCTTCTCCTCTTTTGTGATCTCAATGGGCGTGTGTGGGATCAACATGGGATGGACCATGCCCAGGCCCAGGGCATCTTGGTAGGTCACAAATTCTGGCCTGCTCGTATGCAGCCCGTAAGGCAGGCCAGGCTTTGGGGCAAGGTGCCCAGGAAACAGACTGCCATTGGGTAA	chrX	12057119	12057297		2
Inflammation_2	chrx	TXA0447468	BCOR_t3_14	CATAACGGGCTCTCTCATGG	TGTATCCTCACCCAGTTTTGTTA	231	57	CATAACGGGCTCTCTCATGGGAGCGGGAGCGTCTCTCCGGCTTCTCCTCTTTTGTGATCTCAATGGGCGTGTGTGGGATCAACATGGGATGGACCATGCCCAGGCCCAGGGCATCTTGGTAGGTCACAAATTCTGGCCTGCTCGTATGCAGCCCGTAAGGCAGGCCAGGCTTTGGGGCAAGGTGCCCAGGAAACAGACTGCCATTGGGTAACAAAACTGGGTGAGGATACA	chrX	12057087	12057317		4
Inflammation_2	chrx	TXA0447480	BCOR_t3_13	GTTCTTGTCAGTGGGGACTTC	CATGGTCCATCCCATGTTGA	184	55	GTTCTTGTCAGTGGGGACTTCTGGATGCAGTTTGGTGCTGCTAGCTTCCAACATCTCAGAAAACCGGCTACGGAGGGTTGGGTCCTCATAACGGGCTCTCTCATGGGAGCGGGAGCGTCTCTCCGGCTTCTCCTCTTTTGTGATCTCAATGGGCGTGTGTGGGATCAACATGGGATGGACCATG	chrX	12057001	12057184		1
Inflammation_2	chrx	TXA0447469	BCOR_t3_12	CTAGAGTTTGGCTTCAGGTTCT	GAATTTGTGACCTACCAAGATGC	236	55	CTAGAGTTTGGCTTCAGGTTCTTGTCAGTGGGGACTTCTGGATGCAGTTTGGTGCTGCTAGCTTCCAACATCTCAGAAAACCGGCTACGGAGGGTTGGGTCCTCATAACGGGCTCTCTCATGGGAGCGGGAGCGTCTCTCCGGCTTCTCCTCTTTTGTGATCTCAATGGGCGTGTGTGGGATCAACATGGGATGGACCATGCCCAGGCCCAGGGCATCTTGGTAGGTCACAAATTC	chrX	12056984	12057219		5
Inflammation_2	chrx	TXA0447481	BCOR_t3_11	GTGCCCCTGCATCAGTT	CCTCCGTAGCCGGTTTTC	188	51	GTGCCCCTGCATCAGTTTTAGTGTCTGCTTCTTCTCGGAGAAGGTCTACGTAGACCAGTTTGTCGCTTTTGACCCCAGTCTTCCCTTGATTCCAGCTAGAGTTTGGCTTCAGGTTCTTGTCAGTGGGGACTTCTGGATGCAGTTTGGTGCTGCTAGCTTCCAACATCTCAGAAAACCGGCTACGGAGG	chrX	12056889	12057076		8
Inflammation_2	chrx	TXA0447471	BCOR_t3_10	GTGTCCTGACCTACATTCTCG	GTTTTCTGAGATGTTGGAAGCTA	216	50	GTGTCCTGACCTACATTCTCGGCTACAAGGCCTGCTTTGGGTGCCCCTGCATCAGTTTTAGTGTCTGCTTCTTCTCGGAGAAGGTCTACGTAGACCAGTTTGTCGCTTTTGACCCCAGTCTTCCCTTGATTCCAGCTAGAGTTTGGCTTCAGGTTCTTGTCAGTGGGGACTTCTGGATGCAGTTTGGTGCTGCTAGCTTCCAACATCTCAGAAAAC	chrX	12056849	12057064		6
Inflammation_2	chrx	TXA0447488	BCOR_t3_1	CTACCACGTTCCCCCAAATCC	TCTGAAACCCAAGCCATCCAAG	220	50	CTACCACGTTCCCCCAAATCCCCTTTGTACATTACAAAAACTGACAACTGATAAAGTTAGTGAAATTCGGGTTGGGGGGCTCACCTGCAATGCCCGCTGCTCTCGGCTGAGCTGACTGGAATCTGCATACAGTTCGGTGGTGACACACTTGAATCGGTCGCCCACATAACCTGCCGAGTTAGCAATTCTCTTTGCCAGCTTGGATGGCTTGGGTTTCAGA	chrX	12056260	12056479		6
Inflammation_2	chrx	TXA0490456	BCOR_t2_2	TTGATTACAAATCACTGAGAGCC	AGATGAAAGATATATTCAGCAAGAAA	193	44	TTGATTACAAATCACTGAGAGCCACCCTATCAAGAGAGACCATCCATCCCTTACCACGCTGTGACTCAGGGGAGTCTCCTCCCTCAGCTCCAGCCTGGCTTTTGAAGCGTCGCCATCATTCACAGGAATTTTCCTATTTAAAAAGACACACCAATTTCATGAAAACATTTCTTGCTGAATATATCTTTCATCT	chrX	12060076	12060268		4
Inflammation_2	BCOR	TXA0167244	BCOR_t2_1	cacacTCCCTAATTACACACAAACT	GGTCCGGGGAGATAGATGAAAGA	240	44	cacacTCCCTAATTACACACAAACTAATGCATAGTTGATTACAAATCACTGAGAGCCACCCTATCAAGAGAGACCATCCATCCCTTACCACGCTGTGACTCAGGGGAGTCTCCTCCCTCAGCTCCAGCCTGGCTTTTGAAGCGTCGCCATCATTCACAGGAATTTTCCTATTTAAAAAGACACACCAATTTCATGAAAACATTTCTTGCTGAATATATCTTTCATCTATCTCCCCGGACC	chrX	12060042	12060281	One primer sits in the repeat region	3
Inflammation_2	chrx	TXA0447443	BCOR_t14_5	TTGAGACCTGTCGGTAAAACT	ACTGTAGTACCTTTCCATTTGGC	189	46	TTGAGACCTGTCGGTAAAACTCCGCCTCTGCAATGGTGACAATTTCCAGATTGGGAAAATTGCTACGGAATATCCGGGAGGACATTTTCAACTTCTTGAGCACGTCTGAGAGCAGAAGCCAGTTTCGTGGCCTAGAAAATAGAAAGGGGTGGGACTTAGATTTCTGGCCAAATGGAAAGGTACTACAGT	chrX	12037787	12037975		4
Inflammation_2	BCOR	TXA0167226	BCOR_t14_4	AACAGCTCCTTGCTTTCAGGATT	TTGGCCAGAAATCTAAGTCCCAC	235	48	AACAGCTCCTTGCTTTCAGGATTGAAGGCTTCCAGGTCTTTGGGGCAGGAGAACAAGAGACTTGTTGAGACCTGTCGGTAAAACTCCGCCTCTGCAATGGTGACAATTTCCAGATTGGGAAAATTGCTACGGAATATCCGGGAGGACATTTTCAACTTCTTGAGCACGTCTGAGAGCAGAAGCCAGTTTCGTGGCCTAGAAAATAGAAAGGGGTGGGACTTAGATTTCTGGCCAA	chrX	12037723	12037957		8
Inflammation_2	chrx	TXA0447442	BCOR_t14_3	CAGCAGTGTCTGGAGCTCATT	TCCCGGATATTCCGTAGCAATTTT	183	49	CAGCAGTGTCTGGAGCTCATTGGTGAATTCCACCAGATCCAACAGCTCCTTGCTTTCAGGATTGAAGGCTTCCAGGTCTTTGGGGCAGGAGAACAAGAGACTTGTTGAGACCTGTCGGTAAAACTCCGCCTCTGCAATGGTGACAATTTCCAGATTGGGAAAATTGCTACGGAATATCCGGGA	chrX	12037683	12037865		2
Inflammation_2	BCOR	TXA0167234	BCOR_t14_2	GCACAAGGATTAACACTATAACACAC	GGAGTTTTACCGACAGGTCTCAA	240	53	GCACAAGGATTAACACTATAACACACTGTACACAGTGGGTGGGCGGGGCAGGTGGCTCACCAGTAGTTTTCATGGCCCGTGTCACTAGGGTGGAGCCACTCCACAGAGGAGCCCAGCAGTGTCTGGAGCTCATTGGTGAATTCCACCAGATCCAACAGCTCCTTGCTTTCAGGATTGAAGGCTTCCAGGTCTTTGGGGCAGGAGAACAAGAGACTTGTTGAGACCTGTCGGTAAAACTCC	chrX	12037570	12037809		7
Inflammation_2	chrx	TXA0447444	BCOR_t14_1	TTGTATTATGACACATATGCACAAGG	AAAGACCTGGAAGCCTTCAATCC	212	51	TTGTATTATGACACATATGCACAAGGATTAACACTATAACACACTGTACACAGTGGGTGGGCGGGGCAGGTGGCTCACCAGTAGTTTTCATGGCCCGTGTCACTAGGGTGGAGCCACTCCACAGAGGAGCCCAGCAGTGTCTGGAGCTCATTGGTGAATTCCACCAGATCCAACAGCTCCTTGCTTTCAGGATTGAAGGCTTCCAGGTCTTT	chrX	12037552	12037763		1
Inflammation_2	chrx	TXA0447446	BCOR_t13_3	TTATAACACGGCAAGAGGGAGC	GGCTGAAATCTTCTGTAGTTAACGG	187	44	TTATAACACGGCAAGAGGGAGCTTTCAGCAAACTCAAACTCAAACAAATCGCTATAGGTATCCTCTTCCTCATCTGGGTCTTCTGGTCCTGGGGGATTAGCCAAAACATCGTACCCACTTTCGTCATCTGGTTCTAATGTAAGACAAATGAGAGAGAGGGATCCGTTAACTACAGAAGATTTCAGCC	chrX	12038936	12039122		5
Inflammation_2	BCOR	TXA0167260	BCOR_t13_2	TAGAAGCAGCTTGGCCACTTT	AACGGATCCCTCTCTCTCATTTG	235	47	TAGAAGCAGCTTGGCCACTTTGTGCCAGAAATAGCCATGCTCACCCCTGAGCGACAGACACTTGGATGTTATAACACGGCAAGAGGGAGCTTTCAGCAAACTCAAACTCAAACAAATCGCTATAGGTATCCTCTTCCTCATCTGGGTCTTCTGGTCCTGGGGGATTAGCCAAAACATCGTACCCACTTTCGTCATCTGGTTCTAATGTAAGACAAATGAGAGAGAGGGATCCGTT	chrX	12038868	12039102		6
Inflammation_2	chrx	TXA0447445	BCOR_t13_1	CCTTCATCTGCCTAATGGGACAA	ACCCAGATGAGGAAGAGGATACC	177	48	CCTTCATCTGCCTAATGGGACAAACTGCCTTAGAAGCAGCTTGGCCACTTTGTGCCAGAAATAGCCATGCTCACCCCTGAGCGACAGACACTTGGATGTTATAACACGGCAAGAGGGAGCTTTCAGCAAACTCAAACTCAAACAAATCGCTATAGGTATCCTCTTCCTCATCTGGGT	chrX	12038838	12039014		3
Inflammation_2	chrx	TXA0447447	BCOR_t12_2	TAGGCATAGACATTGGAAGCCAT	GTTGTGCGACACCACACCTA	183	50	TAGGCATAGACATTGGAAGCCATCCACTCCCCACAATAAAAAGCTGCTTACCACACACAGAGCTGCCATAGAACTCCCAAGCGCCGCTGGTGTCATCTTCACTGCGACCCTGCAGGTCATTTAAATAGTCTGCAGAGAAACAGGGGTAGTGATGGAAGATCActaggtgtggtgtcgcacaac	chrX	12039199	12039381	One primer sits in the repeat region	8
Inflammation_2	BCOR	TXA0167245	BCOR_t12_1	CACCACATCCAGACCTCTAACAA	gTGATCTTCCATCACTACCCCTG	235	52	CACCACATCCAGACCTCTAACAATCTTCTCCAGTGACCAAGTTTTTCCAGTGCCCACCGCCCTCCCTCCGGGTAGGCATAGACATTGGAAGCCATCCACTCCCCACAATAAAAAGCTGCTTACCACACACAGAGCTGCCATAGAACTCCCAAGCGCCGCTGGTGTCATCTTCACTGCGACCCTGCAGGTCATTTAAATAGTCTGCAGAGAAACAGGGGTAGTGATGGAAGATCAc	chrX	12039127	12039361	One primer sits in the repeat region	2
Inflammation_2	BCOR	TXA0167263	BCOR_t11_4	TTTCATGATGGTTCTCCCTGAGT	TTTGACTTTGAGCCAGTCGTTTA	239	46	TTTCATGATGGTTCTCCCTGAGTATGTGGCCAAAGTAGGGTCAGCACCATAGGAAAGAAGCAATCGTACAATTTCTAAGTGGTCATTCTCCACAGCATCATGCAGAGGCCTGGGAAGAGACACACAGTGACATTAAGCTTGTGTGAATACACACACACACACACCACCTTCTAAGCTAGAAGCAAAGACACACCACCTACAGTGAGCACCCGGGTATAAACGACTGGCTCAAAGTCAAA	chrX	12040422	12040660		3
Inflammation_2	chrx	TXA0447449	BCOR_t11_3	GTGGGTCATTTTCATGATGGTTC	TCTAGCTTAGAAGGTGGTGTG	189	46	GTGGGTCATTTTCATGATGGTTCTCCCTGAGTATGTGGCCAAAGTAGGGTCAGCACCATAGGAAAGAAGCAATCGTACAATTTCTAAGTGGTCATTCTCCACAGCATCATGCAGAGGCCTGGGAAGAGACACACAGTGACATTAAGCTTGTGTGAATACACACACACACACACCACCTTCTAAGCTAGA	chrX	12040413	12040601		7
Inflammation_2	chrx	TXA0447448	BCOR_t11_2	TGCCCGAAACCATACTGTGC	TGCTTCTTTCCTATGGTGCTGAC	169	42	tgcccgaaaccatacTGTGCACAGGTGAGTCAAACTTTTGAGTAAGATTATTCATTGGACTACATCATACCTGTTAAAAACTTCTCCATAAGTTCACTGTGGGTCATTTTCATGATGGTTCTCCCTGAGTATGTGGCCAAAGTAGGGTCAGCACCATAGGAAAGAAGCA	chrX	12040315	12040483	One primer sits in the repeat region	4
Inflammation_2	BCOR	TXA0167229	BCOR_t11_1	CTAGGACTGTAGGTGCCCGAAA	GCTGTGGAGAATGACCACTTAGA	216	43	ctaggactgtaggtgcccgaaaccatacTGTGCACAGGTGAGTCAAACTTTTGAGTAAGATTATTCATTGGACTACATCATACCTGTTAAAAACTTCTCCATAAGTTCACTGTGGGTCATTTTCATGATGGTTCTCCCTGAGTATGTGGCCAAAGTAGGGTCAGCACCATAGGAAAGAAGCAATCGTACAATTTCTAAGTGGTCATTCTCCACAGC	chrX	12040302	12040517	One primer sits in the repeat region	1
Inflammation_2	chrx	TXA0447451	BCOR_t10_4	GCGCCATATTCAAGGAGGTGG	TCCTTGTGAGGTGACTGTGTG	190	52	GCGCCATATTCAAGGAGGTGGCGCACGATGTTGAGCCATCCCCTGGCGCAAGCTTCATGCAGAGCACAGTAGCCAGCATTGTCTCGATGATTGACATCACAGACCTTGTTCTCCAGGCAATATAAGACCACTTCCTGTGGGGAGGGAACAGGAAATACCATCCAATCACCACACAGTCACCTCACAAGGA	chrX	12041535	12041724		8
Inflammation_2	BCOR	TXA0167225	BCOR_t10_3	CAAGGAGACACACCACTGACC	GGATGGTATTTCCTGTTCCCTCC	216	53	CAAGGAGACACACCACTGACCTGGTTCCATCCTGGGCACTGCAGTTGACATCAGCGCCATATTCAAGGAGGTGGCGCACGATGTTGAGCCATCCCCTGGCGCAAGCTTCATGCAGAGCACAGTAGCCAGCATTGTCTCGATGATTGACATCACAGACCTTGTTCTCCAGGCAATATAAGACCACTTCCTGTGGGGAGGGAACAGGAAATACCATCC	chrX	12041482	12041697		6
Inflammation_2	chrx	TXA0447450	BCOR_t10_2	AGAGCTACCGTCTGTTCCTCTAA	CAATGCTGGCTACTGTGCTCT	173	55	AGAGCTACCGTCTGTTCCTCTAAAGGAAGGATGAGGATGCAAGGAGACACACCACTGACCTGGTTCCATCCTGGGCACTGCAGTTGACATCAGCGCCATATTCAAGGAGGTGGCGCACGATGTTGAGCCATCCCCTGGCGCAAGCTTCATGCAGAGCACAGTAGCCAGCATTG	chrX	12041443	12041615		2
Inflammation_2	BCOR	TXA0167239	BCOR_t10_1	TCTCTGCATCCCCTTAGAGCTAC	TATTGCCTGGAGAACAAGGTCTG	229	53	TCTCTGCATCCCCTTAGAGCTACCGTCTGTTCCTCTAAAGGAAGGATGAGGATGCAAGGAGACACACCACTGACCTGGTTCCATCCTGGGCACTGCAGTTGACATCAGCGCCATATTCAAGGAGGTGGCGCACGATGTTGAGCCATCCCCTGGCGCAAGCTTCATGCAGAGCACAGTAGCCAGCATTGTCTCGATGATTGACATCACAGACCTTGTTCTCCAGGCAATA	chrX	12041428	12041656		5
Inflammation_2	chrx	TXA0447500	BCOR_t1_2	GGAGTGTGGAGGAGAAGACCC	GCCCTCCCCCCTTTCTTTTTT	216	56	GGAGTGTGGAGGAGAAGACCCGCCCGTTCTCCCTCACCAGGCCTGGCCCTGGAGACTATTCACCTGTCTTCACTTGTTCCACACATGCGGACCCTCTCGCTGTTCATCCAGCTGTGAACGTTCCCATACAGAGGGGTTGCAGAAAGCATGTCGCCCCTTGGATGGCAGCTTGGCTTCAAGCGTCTAGTCTGTTTAAAAAAAGAAAGGGGGGAGGGC	chrX	12061459	12061674		8
Inflammation_2	BCOR	TXA0167242	BCOR_t1_1	CTCTCTGGCTGTGAGGAGATGA	GAAGCCAAGCTGCCATCCAAG	230	59	CTCTCTGGCTGTGAGGAGATGAGGGGGGCTTGGGTATGCATGGGCTCTGCTCAGGAGTGTGGAGGAGAAGACCCGCCCGTTCTCCCTCACCAGGCCTGGCCCTGGAGACTATTCACCTGTCTTCACTTGTTCCACACATGCGGACCCTCTCGCTGTTCATCCAGCTGTGAACGTTCCCATACAGAGGGGTTGCAGAAAGCATGTCGCCCCTTGGATGGCAGCTTGGCTTC	chrX	12061406	12061635		6
